# Supplementary material for: Identification of organophosphorus simulants for the development of next-generation detection technologies
Source: Royal Society of Chemistry journal article supplement (doi:10.1039/d0ob02523b), 2021-01-01
Supplement: d0ob02523b1.pdf [file d0ob02523b1.pdf]

## Identification of organophosphorus simulants for the development of next-generation detection technologies

Rebecca J. Ellaby,<sup>a</sup> Ewan R. Clark,<sup>\*a</sup> Nyasha Allen,<sup>b</sup> Faith R. Taylor,<sup>a</sup> Kendrick K. L. Ng,<sup>a</sup> Dominique F. Chu,<sup>c</sup> Milan Dimitrovski,<sup>a</sup> Daniel P. Mulvihill<sup>b</sup> and Jennifer R. Hiscock<sup>\*a</sup>

<sup>a</sup> School of Physical Sciences, University of Kent, Park Wood Road, Canterbury, Kent, CT2 7NH, UK. E-mail: J.R.Hiscock@Kent.ac.uk; Tel: +44(0) 1227 816467. E-mail: J.R.Hiscock@Kent.ac.uk; Tel: +44(0) 1227 816467. E-mail: E.R.Clark@Kent.ac.uk; Tel: +44(0) 1227 816152.

<sup>b</sup> School of Biosciences, University of Kent, Park Wood Road, Canterbury, Kent, CT2 7NH, UK.

<sup>c</sup> School of Computing, University of Kent, Darwin Road, Canterbury, CT2 7NF.

### Table of contents

|                                                                       |     |
|-----------------------------------------------------------------------|-----|
| Chemical structures.....                                              | 2   |
| Experimental.....                                                     | 3   |
| General remarks:.....                                                 | 3   |
| Proton NMR titration method:.....                                     | 3   |
| Association constant determination:.....                              | 3   |
| Job Plot analysis method:.....                                        | 3   |
| Experimental for compounds 1-26.....                                  | 4   |
| NMR characterisation.....                                             | 9   |
| <sup>1</sup> H NMR titration results.....                             | 25  |
| Job Plot analysis.....                                                | 47  |
| Single crystal X-ray structure information.....                       | 51  |
| Biological testing.....                                               | 52  |
| <i>Schizosaccharomyces pombe</i> toxicity screening experimental..... | 52  |
| <i>S. Pombe</i> screening Results.....                                | 54  |
| Low level PM6 modelling.....                                          | 65  |
| Low level DFT (B3LYP/6-31G*) modelling.....                           | 78  |
| High-level DFT modelling.....                                         | 85  |
| Exhaustive parameter search.....                                      | 160 |
| Two Parameter Fits.....                                               | 161 |
| Three Parameter Fits.....                                             | 167 |
| Free energy contributions and Parametric fitting.....                 | 172 |
| References.....                                                       | 173 |

## Chemical structures

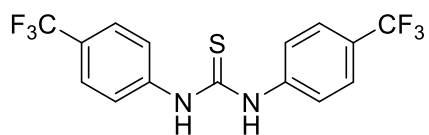

**1**

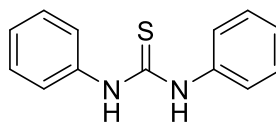

**2**

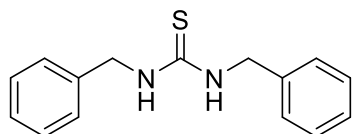

**3**

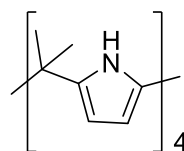

**4**

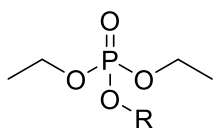

**5** R = a; **6** R = b  
**7** R = c; **8** R = d  
**9** R = e; **10** R = f

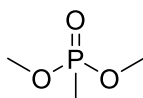

**11**  
(DMMP)

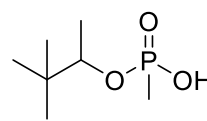

**12**  
(PMP)

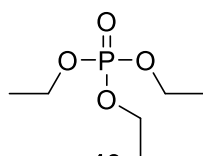

**13**  
(TEP)

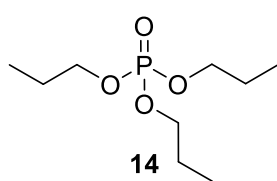

**14**  
(TnPP)

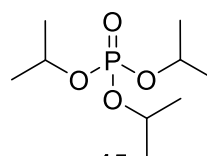

**15**  
(TiPP)

### R Group

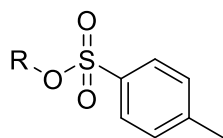

**16** R = b; **17** R = c  
**18** R = d; **19** R = e  
**20** R = f

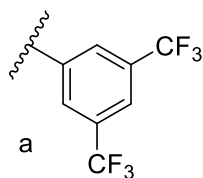

a

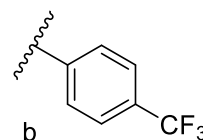

b

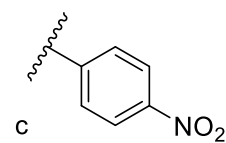

c

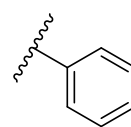

d

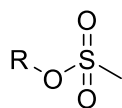

**21** R = a; **22** R = b  
**23** R = c; **24** R = d  
**25** R = e; **26** R = f

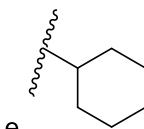

e

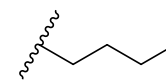

f

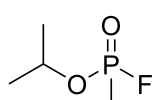

sarin

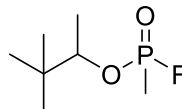

soman

## Experimental

**General remarks:** All reactions were performed under slight positive pressure of nitrogen using oven dried glassware. NMR spectra were determined using a Bruker AV II or NEO 400 MHz spectrometer with chemical shifts reported in parts per million (ppm) and calibrated to the centre of the solvent peak set. Herein: br = broad; s = singlet; d = doublet; t = triplet; q = quartet, sept = septet and; m = multiplet. All solvents and starting materials were purchased from commercial sources or chemical stores where available and, used as purchased unless stated otherwise. High resolution mass spectra were collected using a Bruker microTOF-Q mass spectrometer or a SYNAPT G2-S Mass Spectrometer. Infrared spectra were recorded on a Shimadzu IR-Affinity 1 and reported in wavenumbers ( $\text{cm}^{-1}$ ). The melting point for each compound was determined using Stuart SMP10 melting point apparatus. *Schizosaccharomyces pombe* screening was carried out using 96 well plates and the Thermo Scientific™, Multiskan™ GO Microplate Spectrophotometer or CLARIOstar high performance plate reader with optical density reading taken at 600 nm every 15 minutes for 45 hours. A Neubauer Improved Bright-Line Cell Counting Chamber Hemocytometer was used in all cell density measurements. Tensiometry measurements were undertaken using the Biolin Scientific Theta Attension optical tensiometer.

**Proton NMR titration method:** Firstly, a solution of receptor **1-4** (1.5 mL, 0.01 M) was prepared. Of this solution 0.5 mL was placed in an NMR tube. The remaining 1 mL of the receptor solution was used to prepare a 0.15 M solution of the guest (**5-26**). The guest-receptor stock solution was titrated into the NMR tube and a  $^1\text{H}$  NMR taken before/after each addition of the stock solution.

**Association constant determination:** All association constants were calculated using Bindfit v0.5 (<http://app.supramolecular.org/bindfit/>). All data relating to the calculation of the association constants can be accessed online, through the links given for each association event.

**Job Plot analysis method:** Two solutions were produced; the first solution was a 3 mL, 0.01 M solution of the receptor and the second was a 3 mL, 0.01 M solution of the simulant. Of the receptor solution 0.5 mL was added to a NMR tube. The amount of receptor solution was then decreased by 0.05 mL and the amount of simulant solution increased by 0.05 mL for each successive NMR tubes until a 9:1 simulant:receptor ratio was reached. A  $^1\text{H}$  NMR spectra was taken for each of the ten NMR tubes and calibrated to the solvent peak. The data was then used to produce a job plot, in accordance with the methods described by Job.<sup>1</sup>

## Experimental for compounds 1-26

**Compound 1:** A solution of 4-(trifluoromethyl)phenyl isothiocyanate (1.57 g, 7.16 mmol) and 4-(trifluoromethyl)aniline (0.90 mL, 7.16 mmol) in pyridine (4 mL) was stirred at room temperature overnight. The pyridine solution was then added to water (30 mL) to precipitate a white solid. This solid was collected by filtration and washed with water and then dried to give the final product as a white solid (1.92 g, 5.26 mmol) in a yield of 73.5 %. <sup>1</sup>H NMR: (400 MHz, 298 K, DMSO-*d*<sub>6</sub>): δ: 7.72 (dd, *J*<sub>1</sub> = 8.80 Hz, *J*<sub>2</sub> = 16.40 Hz, 8H), 10.37 (s, 2NH).

This compound has been previously synthesised by Gale and co-workers.<sup>1</sup> The <sup>1</sup>H NMR data provided was found to match these previously published data.

**Compound 2:** A solution of phenyl isothiocyanate (1.45 g, 10.74 mmol) and aniline (0.98 mL, 10.74 mmol) in pyridine (4 mL) was stirred at room temperature overnight. The pyridine solution was then added to water (30 mL) to precipitate a white solid. This solid was collected by filtration and washed with water and dried to give the final product as a white solid (2.07 g, 9.06 mmol) in a yield of 84.4 %. <sup>1</sup>H NMR: (400 MHz, 298 K, DMSO-*d*<sub>6</sub>): δ: 7.12 (t, *J* = 7.40 Hz, 2H), 7.33 (t, *J*<sub>1</sub> = 8.28 Hz, 4H), 7.47 (d, *J* = 7.52 Hz, 4H), 9.80 (s, 2NH).

This compound has been previously synthesised by Gale and co-workers.<sup>1</sup> The <sup>1</sup>H NMR data provided was found to match these previously published data.

**Compound 3:** A solution of benzyl isothiocyanate (1.24 mL, 9.33 mmol) and benzylamine (1 mL, 9.33 mmol) in pyridine (4 mL) was stirred at room temperature overnight. The pyridine solution was then added to water (30 mL) to precipitate a white solid. The white solid was then collected by filtration and washed with water and dried to give the pure product (1.74 g, 6.79 mmol) in a yield of 72.8 %. <sup>1</sup>H NMR: (400 MHz, 298 K, CDCl<sub>3</sub>): δ: 4.66 (s, 4H), 7.25-7.34 (m, 12H). <sup>1</sup>H NMR: (400 MHz, 298 K, CD<sub>3</sub>CN): δ: 4.69 (br s, 2H), 6.77 (br s, 2NH), 7.24-7.35 (m, 10H).

This compound has been previously synthesised by Lui and co-workers.<sup>2</sup> The <sup>1</sup>H NMR data provided was found to match previously these published data. Proton NMR was also obtained in CD<sub>3</sub>CN (Figure S4) to allow accurate integration.

**Compound 4:** Acetone (5.00 mL, 67.15 mmol) was added to pyrrole (1.00 mL, 14.04 mmol), followed with a few drops of HCl. The solution was left to stir for 30 minutes. A yellow precipitate formed which was collected by filtration, washed with methanol and then dried to give the final product as a white solid (0.858 g, 2.00 mmol) in a yield of 57.1 %. <sup>1</sup>H NMR: (400 MHz, 298 K, CDCl<sub>3</sub>): δ: 7.00 (s, 4NH), 5.90 (d, *J* = 2.72 Hz, 8H), 1.51 (s, 24H).

This compound has been previously synthesised by Chauhan and co-workers.<sup>3</sup> The <sup>1</sup>H NMR data provided was found to match these previously published data.

**Compound 5:** Diethyl chlorophosphate (0.45 mL, 3.08 mmol) was added to a stirring solution of 3,5-(trifluoromethyl)phenol (0.47 mL, 3.08 mmol) and triethylamine (0.43 mL, 3.08 mmol) in chloroform (10 mL). The mixture was then allowed to stir at room temperature overnight. The organic phase was then washed with an aqueous 0.3M NaOH solution (30 mL). The organic layer was then taken to dryness to give this final product as a colourless oil (0.73 g, 2.00 mmol) with a yield of 64.9 %. <sup>1</sup>H{<sup>31</sup>P} NMR: (400 MHz, 298 K, CDCl<sub>3</sub>): δ: 1.32 (t, *J* = 7.08 Hz, 6H), 4.22 (q, *J* = 7.12 Hz, 4H), 7.64 (br s, 3H); <sup>13</sup>C{<sup>1</sup>H} NMR: (100 MHz, 298 K, CDCl<sub>3</sub>): δ: 16.0 (d, *J* = 6.49 Hz, CH<sub>3</sub>), 65.3 (d, *J* = 6.12 Hz, CH<sub>2</sub>), 118.7 (sept, *J* = 3.61 Hz, ArCH), 120.8 (m, ArCH), 122.6 (q, *J* = 271.42 Hz, CF<sub>3</sub>), 133.3 (q, *J* = 33.94 Hz, ArC), 151.4

(d,  $J = 6.31$  Hz, ArC). IR (film):  $\nu = (\text{cm}^{-1})$ : 831 (P-O stretch), 1275 (P=O stretch); HRMS ( $\text{C}_{12}\text{H}_{13}\text{F}_6\text{O}_4\text{P}$ ) ( $\text{ESI}^+$ ):  $m/z$ : act: 367.0652  $[\text{M} + \text{H}]^+$ , cal: 367.0534  $[\text{M} + \text{H}]^+$ .

**Compound 6:** Diethyl chlorophosphate (0.59 g, 3.08 mmol) was added to a stirring solution of 4-(trifluoromethyl)phenol (0.50 g, 3.08 mmol) and triethylamine (0.43 mL, 3.08 mmol) in chloroform (10 mL). The mixture was then allowed to stir at room temperature overnight. The organic phase was then washed with an aqueous 0.3M NaOH solution (30 mL). The organic layer was then taken to dryness to give the final product as a colourless oil (0.83 g, 2.78 mmol) in a yield of 90.3 %.  $^1\text{H}\{^{31}\text{P}\}$  NMR: (400 MHz, 298 K,  $\text{CDCl}_3$ ):  $\delta$ : 1.39 (t,  $J = 7.08$  Hz, 6H), 4.26 (q,  $J = 7.08$  Hz, 4H), 7.36 (d,  $J = 8.56$  Hz, 2H), 7.64 (d,  $J = 8.64$  Hz, 2H);  $^{13}\text{C}\{^1\text{H}\}$  NMR: (100 MHz, 298 K,  $\text{CDCl}_3$ ):  $\delta$ : 16.0 (d,  $J = 7.22$  Hz,  $\text{CH}_3$ ), 64.9 (d,  $J = 5.77$  Hz,  $\text{CH}_2$ ), 120.2 (d,  $J = 5.05$ , ArCH), 122.5 (q,  $J = 270.08$  Hz,  $\text{CF}_3$ ), 127.1 (q,  $J = 3.61$  Hz, ArCH), 127.2 (q,  $J = 33.22$  Hz, ArC), 153.2 (dd,  $J_1 = 1.59$  Hz,  $J_2 = 6.50$  Hz, ArC); IR (film):  $\nu = (\text{cm}^{-1})$ : 820 (P-O stretch), 1277 (P=O stretch). HRMS ( $\text{C}_{11}\text{H}_{14}\text{F}_3\text{O}_4\text{P}$ ) ( $\text{ESI}^+$ ):  $m/z$ : act: 299.0762  $[\text{M} + \text{H}]^+$ , cal: 299.0660  $[\text{M} + \text{H}]^+$ .

**Compound 7:** Diethyl chlorophosphate (0.52 mL, 3.59 mmol) was added to a stirring solution of 4-nitrophenol (0.50 g, 3.59 mmol) and triethylamine (0.50 mL, 3.59 mmol) in chloroform (10 mL). This mixture was then allowed to stir at room temperature overnight. The organic phase was then washed with an aqueous 0.3M NaOH solution (30 mL). The organic layer was then taken to dryness to give the pure product as a clear yellow oil (0.86 g, 2.86 mmol) in a yield of 79.7 %.  $^1\text{H}$  NMR: (400 MHz, 298 K,  $\text{CDCl}_3$ ):  $\delta$ : 1.31 (t,  $J = 7.08$  Hz, 6H), 4.19 (q,  $J = 7.08$ , 4H), 7.31 (d,  $J = 9.20$  Hz, 2H), 8.18 (d,  $J = 9.16$ , 2H).

This compound has been previously synthesised by Kuei and co-workers.<sup>4</sup> The  $^1\text{H}$  NMR data provided was found to match previously these published data.

**Compound 8:** Diethyl chlorophosphate (0.77 mL, 5.31 mmol) was added to a stirring solution of phenol (0.5 g, 5.31 mmol) and triethylamine (0.74 mL, 5.31 mmol) in chloroform (10 mL). The mixture was then allowed to stir at room temperature overnight. The mixture was then allowed to stir at room temperature overnight. The organic phase was then washed with an aqueous 0.3M NaOH solution (30 mL). The organic layer was then taken to dryness to give the pure product as a colourless oil (0.77 g, 3.37 mmol) with a yield of 63.5 %.  $^1\text{H}\{^{31}\text{P}\}$  NMR: (400 MHz, 298 K,  $\text{CDCl}_3$ ):  $\delta$ : 1.34 (t,  $J = 7.08$  Hz, 6H), 4.20 (q,  $J = 7.08$  Hz, 4H), 7.14 – 7.22 (m, 3H), 7.33 (t,  $J = 8.58$  Hz, 2H).

This compound has been previously synthesised by Katritzky and co-workers.<sup>5</sup> The  $^1\text{H}$  NMR data provided was found to match previously these published data.

**Compound 9:** Diethyl chlorophosphate (2.20 mL, 15.0 mmol) in pyridine (1.20 mL, 15.0 mmol) was added to a stirring solution of cyclohexanol (1.00 g, 9.98 mmol) in dichloromethane (10 mL). The solution was stirred at 0 °C then allowed to warm up to room temperature overnight. The reaction was then quenched with methanol (50 mL) and concentrated in vacuo. The resulting white solid was then dissolved in ethyl acetate (50 mL) and washed with 1M HCl (50 mL), saturated  $\text{NaHCO}_3$  solution (50 mL). The organic layer was then taken to dryness to give a colourless oil (1.93 g, 8.17 mmol) with a yield of 81.7 %.  $^1\text{H}\{^{31}\text{P}\}$  NMR (298 K,  $\text{CDCl}_3$ , 400 MHz):  $\delta$ : 1.24-1.99 (m, 18H), 4.11 (q,  $J = 7.08$ , 4H), 4.34-4.41 (m, 1H).

This compound has been previously synthesised by Kang et al.<sup>6</sup> The  $^1\text{H}$  NMR data provided was found to match previously these published data.

**Compound 10:** Diethyl chlorophosphate (0.97 mL, 6.74 mmol) was added to a stirring solution of butanol (0.50 g, 6.74 mmol) and triethylamine (0.94 mL, 6.74 mmol) in chloroform (10 mL). The mixture was then allowed to stir at room temperature overnight. The organic phase was then washed with an aqueous 0.3M NaOH solution (30 mL). The organic layer was then taken to dryness to give the pure product as a colourless oil (1.21 g, 5.74 mmol) in a yield of 85.2 %.  $^1\text{H}\{^{31}\text{P}\}$  NMR: (400 MHz, 298 K,  $\text{CDCl}_3$ ):  $\delta$ : 0.93 (t,  $J = 7.36$  Hz, 3H), 1.32 – 1.46 (m, 8H), 1.63 – 1.70 (m, 2H), 4.02 – 4.13 (m, 6H);  $^{13}\text{C}\{^1\text{H}\}$  NMR: (100 MHz, 298 K,  $\text{DMSO}-d_6$ ):  $\delta$ : 13.9 ( $\text{CH}_3$ ), 16.4 ( $\text{CH}_2$ ), 18.6 ( $\text{CH}_2$ ), 32.2 (d,  $J = 6.54$  Hz,  $\text{CH}_3$ ), 63.5 (d,  $J = 5.80$  Hz,  $\text{CH}_2$ ), 67.0 (d,  $J = 5.95$  Hz,  $\text{CH}_2$ ); IR (film):  $\nu = (\text{cm}^{-1})$ : 802 (P-O stretch), 1275 (P=O stretch); HRMS ( $\text{C}_8\text{H}_{19}\text{O}_4\text{P}$ ) ( $\text{ESI}^+$ ):  $m/z$ : act: 211.1142 [ $\text{M} + \text{H}$ ] $^+$ , cal: 211.1099 [ $\text{M} + \text{H}$ ] $^+$ .

**Compound 16:** *p*-Toluene sulfonylchloride (0.588 g, 3.08 mmol) was added to a stirring solution of 4-(trifluoromethyl)phenol (0.75 g, 4.62 mmol) and triethylamine (0.43 mL, 4.62 mmol) in chloroform (10 mL). The mixture was then allowed to stir at room temperature overnight and then washed with an aqueous 0.3M NaOH solution (30 mL). The organic layer was then taken to dryness under reduced pressure to give the pure product as a white solid (0.58 g, 1.82 mmol) in a yield of 59.1 %.  $^1\text{H}$  NMR: (400 MHz, 298 K,  $\text{CDCl}_3$ ):  $\delta$ : 2.44 (s, 3H), 7.10 (d,  $J = 8.36$  Hz, 2H), 7.32 (d,  $J = 8.00$  Hz, 2H), 7.55 (d,  $J = 8.52$  Hz, 2H), 7.70 (d,  $J = 8.40$  Hz, 2H).  $^{13}\text{C}\{^1\text{H}\}$  NMR: (100 MHz, 298 K,  $\text{CDCl}_3$ ):  $\delta$ : 21.7 ( $\text{CH}_3$ ), 122.9 (ArCH), 122.2 (q,  $J = 270.81$  Hz,  $\text{CF}_3$ ), 127.0 (q,  $J = 3.61$  Hz, ArCH), 128.5 (ArC), 129.2 (q,  $J = 33.22$  Hz, ArC), 129.9 (ArCH), 132.0 (ArC), 145.8 (ArC), 151.9 (ArC); IR (film):  $\nu = (\text{cm}^{-1})$ : 849 (S-O stretch), 1184 and 1352 (S=O stretch); HRMS ( $\text{C}_{14}\text{H}_{11}\text{F}_3\text{O}_3\text{S}$ ) ( $\text{ESI}^+$ ):  $m/z$ : act: 339.0286 [ $\text{M} + \text{Na}$ ] $^+$ , cal: 339.0279 [ $\text{M} + \text{Na}$ ] $^+$ .

**Compound 17:** *p*-Toluene sulfonylchloride (0.69 g, 3.59 mmol) was added to a stirring solution of 4-nitrophenol (0.50 g, 3.59 mmol) and triethylamine (0.50 mL, 3.59 mmol) in chloroform (10 mL). This mixture was allowed to stir at room temperature overnight, then washed with an aqueous 0.3M NaOH solution (30 mL), and the organic layer was then taken to dryness to give the pure product as a pale yellow solid (0.84 g, 2.88 mmol) in a yield of 80.2 %.  $^1\text{H}$  NMR: (400 MHz, 298 K,  $\text{CDCl}_3$ ):  $\delta$ : 2.50 (s, 3H), 7.21 (d,  $J = 9.20$  Hz, 2H), 7.38 (d,  $J = 8.04$  Hz, 2H), 7.76 (d,  $J = 8.40$  Hz, 2H), 8.22 (d,  $J = 9.20$  Hz, 2H).

This compound has been previously synthesised by Wei and co-workers.<sup>7</sup> The  $^1\text{H}$  NMR data provided was found to match these previously published data.

**Compound 18:** *p*-Toluene sulfonylchloride (1.01 g, 5.31 mmol) was added to a stirring solution of phenol (0.50 g, 5.31 mmol) and triethylamine (0.74 mL, 5.31 mmol) in chloroform (10 mL) and, stirred at room temperature overnight. The solution was then washed with an aqueous 0.3M NaOH solution (30 mL), and the organic layer was then taken to dryness to give the pure product as a white solid (1.27 g, 5.10 mmol) in a yield of 96.0 %.  $^1\text{H}$  NMR: (400 MHz, 298 K,  $\text{CDCl}_3$ ):  $\delta$ : 2.42 (s, 3H), 7.00 (d,  $J = 8.16$  Hz, 2H), 7.31 (t,  $J = 7.36$  Hz, 1H), 7.38 (t,  $J = 7.12$  Hz, 2H), 7.46 (d,  $J = 7.96$  Hz, 2H), 7.72 (d,  $J = 8.32$  Hz, 2H).

This compound has been previously synthesised by Gibson and co-workers.<sup>8</sup> The  $^1\text{H}$  NMR data provided was found to match these previously published data.

**Compound 19:** *p*-Toluenesulfonyl chloride (2.85 g, 15.00 mmol) in pyridine (1.20 mL, 15.00 mmol) was added to a stirring solution of cyclohexanol (1.00 g, 9.98 mmol) in dichloromethane (10 mL). The solution was stirred at 0 °C and allowed to warm to room temperature overnight. The reaction was then quenched with methanol (50 mL) and concentrated in vacuo. The resulting white solid was then dissolved in ethyl acetate (50 mL) and washed with 1M HCl (50

mL), saturated NaHCO<sub>3</sub> solution (50 mL). The organic layer was taken to dryness to give a colourless oil (1.82 g, 7.16 mmol) with a yield 71.6 %. <sup>1</sup>H NMR (298 K, CDCl<sub>3</sub>, 400 MHz): δ; 0.85-1.81 (m, 12H), 2.46 (s, 3H), 4.49 – 4.55 (m, 1H), 7.34 (d, J = 7.96 Hz, 2H), 7.34 (d, J = 8.32 Hz, 2H).

This compound has been previously synthesised by Wei and co-workers.<sup>7</sup> The <sup>1</sup>H NMR data provided was found to match those previously published data.

**Compound 20:** *p*-Toluene sulfonylchloride (1.29 g, 6.74 mmol) was added to a stirring solution of butanol (0.62 mL, 6.74 mmol) and triethylamine (0.94 mL, 6.74 mmol) in chloroform (10 mL). This mixture was allowed to stir at room temperature overnight, then washed with an aqueous 0.3M NaOH solution (30 mL), and the organic layer was then taken to dryness to give the pure product as a colourless oil (1.32 g, 5.78 mmol) in a yield of 85.8 %. <sup>1</sup>H NMR: (400 MHz, 298 K, CDCl<sub>3</sub>): δ: 0.85 (t, J = 7.40 Hz, 3H), 1.29-1.39 (m, 2H), 1.59-1.66 (m, 2H), 2.45 (s, CH<sub>3</sub>), 4.03 (t, J = 6.74 Hz, 2H), 7.35 (d, J = 8.00 Hz, 2H), 7.79 (d, J = 7.79 Hz, 2H).

This compound has been previously synthesised by Wei and co-workers.<sup>7</sup> The <sup>1</sup>H NMR data provided was found to match these previously published data.

**Compound 21:** To a stirring solution of 3,5-bis(trifluoromethyl) phenol (1.00 g, 4.34 mmol) in chloroform (10 mL) and trimethylamine (0.86 ml, 6.17 mmol), was added methylsulfonyl chloride (0.34 mL, 4.34 mmol). The solution was stirred at room temperature for three hours, washed with an aqueous 0.3M NaOH solution (30 mL), and the organic layer taken to dryness to give a white solid (1.31 g, 4.25 mmol) with a yield of 98.5 % . <sup>1</sup>H NMR (298 K, CDCl<sub>3</sub>, 400 MHz): δ; 3.31 (s, 3H), 7.79 (s, 2H), 7.89 (s, 2H).

This compound has been previously synthesised by Seayad and co-workers.<sup>9</sup> The <sup>1</sup>H NMR data provided was found to match previously these published data.

**Compound 22:** Methylsulfonyl chloride (0.13 mL, 1.58 mmol) was added to a stirring solution of 4-trifluoromethyl phenol (0.26 g, 1.58 mmol) in chloroform (10 mL) and trimethylamine (0.22 ml, 1.58 mmol). The solution was stirred at room temperature for three hours, washed with an aqueous 0.3M NaOH solution (30 mL), and the organic layer taken to dryness to give a pale yellow solid (0.35 g, 1.44 mmol) with a yield of 91.2 %, mp 49-51 °C. <sup>1</sup>H NMR (298 K, CDCl<sub>3</sub>, 400 MHz): δ; 3.23 (s, 3H), 7.44 (d, J = 8.52 Hz, 2H), 7.73 (d, J = 8.52 Hz, 2H); <sup>13</sup>C{<sup>1</sup>H} NMR: (100 MHz, 298 K, CDCl<sub>3</sub>): δ: 37.8 (CH<sub>3</sub>), 122.2 (q, J = 270.84 Hz, CF<sub>3</sub>), 122.6 (ArCH), 127.5 (q, J = 3.69 Hz, ArCH), 129.37 (q, J = 32.93 Hz, ArC), 151.3 (ArC). IR (film): ν = (cm<sup>-1</sup>): 851 (S-O stretch), 1175 and 1364 (S=O stretch).

**Compound 23:** Methylsulfonyl chloride (0.56 mL, 7.19 mmol) was added to a stirring solution of 4-nitrophenol (1.00 g, 7.19 mmol) in chloroform (10 mL) and trimethylamine (0.50 ml, 3.56 mmol). The solution was stirred at room temperature for three hours, washed with an aqueous 0.3M NaOH solution (30 mL), and the organic layer taken to dryness to give a white solid (0.94 g, 4.35 mmol) with a yield of 60.5 % . <sup>1</sup>H NMR (298 K, CDCl<sub>3</sub>, 400 MHz): δ; 3.23 (s, 3H), 7.50 (d, J = 9.20 Hz, 2H), 8.34 (d, J = 9.16 Hz, 2H).

This compound has been previously synthesised by Tokuyama and co-workers.<sup>10</sup> The <sup>1</sup>H NMR data provided was found to match previously these published data.

**Compound 24:** Methylsulfonyl chloride (0.82 mL, 10.63 mmol) was added to a stirring solution of phenol (1.00 g, 10.63 mmol) in chloroform (10 mL) and trimethylamine (0.50 mL, 3.56 mmol). The solution was stirred at room temperature for three hours, washed with an aqueous 0.3M NaOH solution (30 mL), and the organic layer taken to dryness to give a white solid (0.96 g, 5.56 mmol) with a yield of 52.3 %. <sup>1</sup>H NMR (298 K, CDCl<sub>3</sub>, 400 MHz): δ; 3.16 (s, 3H), 7.31 – 7.38 (m, 3H), 7.45 (t, J = 7.28 Hz, 2H).

This compound has been previously synthesised by Seayad and co-workers.<sup>9</sup> The <sup>1</sup>H NMR data provided was found to match previously these published data.

**Compound 25:** Methylsulfonyl chloride (0.78 mL, 10.10 mmol) in pyridine (0.82 mL, 10.10 mmol) was added to a stirring solution of cyclohexanol (1.00 g, 9.98 mmol) in dichloromethane (10 mL). The solution was stirred at 0 °C and allowed to warm to room temperature. The reaction was then quenched with methanol (50 mL) and concentrated in vacuo. The resulting white solid was then dissolved in ethyl acetate (50 mL) and washed with 1M HCl (50 mL), saturated NaHCO<sub>3</sub> solution (50 mL). The organic layer was then taken to dryness to give a yellow oil (1.68 g, 9.42 mmol) with a yield of 94.4 %. <sup>1</sup>H NMR (298 K, CDCl<sub>3</sub>, 400 MHz): δ; 1.29-2.03 (m, 10H), 3.02 (s, 3H), 4.72 (m, 1H).

This compound has been previously synthesised by Martín and co-workers.<sup>11</sup> The <sup>1</sup>H NMR data provided was found to match previously these published data.

**Compound 26:** Methylsulfonyl chloride (1.56 mL, 20.20 mmol) in pyridine (1.64 mL, 20.20 mmol) was added to a stirring solution of butanol (1.00 g, 13.4 mmol) in dichloromethane (10 mL). The solution was stirred at 0 °C and allowed to warm to room temperature. The reaction was then quenched with methanol (50 mL) and concentrated in vacuo. The resulting white solid was then dissolved in ethyl acetate (50 mL) and washed with 1M HCl (50 mL), saturated NaHCO<sub>3</sub> solution (50 mL) organic layer taken to dryness to give a yellow oil (1.43 g, 9.39 mmol) with a yield of 70.1 %. <sup>1</sup>H NMR (298 K, CDCl<sub>3</sub>, 400 MHz): δ; 0.89 (t, J = 7.36 Hz, 3H), 1.37 (m, 2H), 1.67 (m, 2H), 2.93 (s, 3H), 4.17 (t, J = 6.56 Hz, 2H).

This compound has been previously synthesised by Li and co-workers.<sup>12</sup> The <sup>1</sup>H NMR data provided was found to match previously these published data.



## NMR characterisation

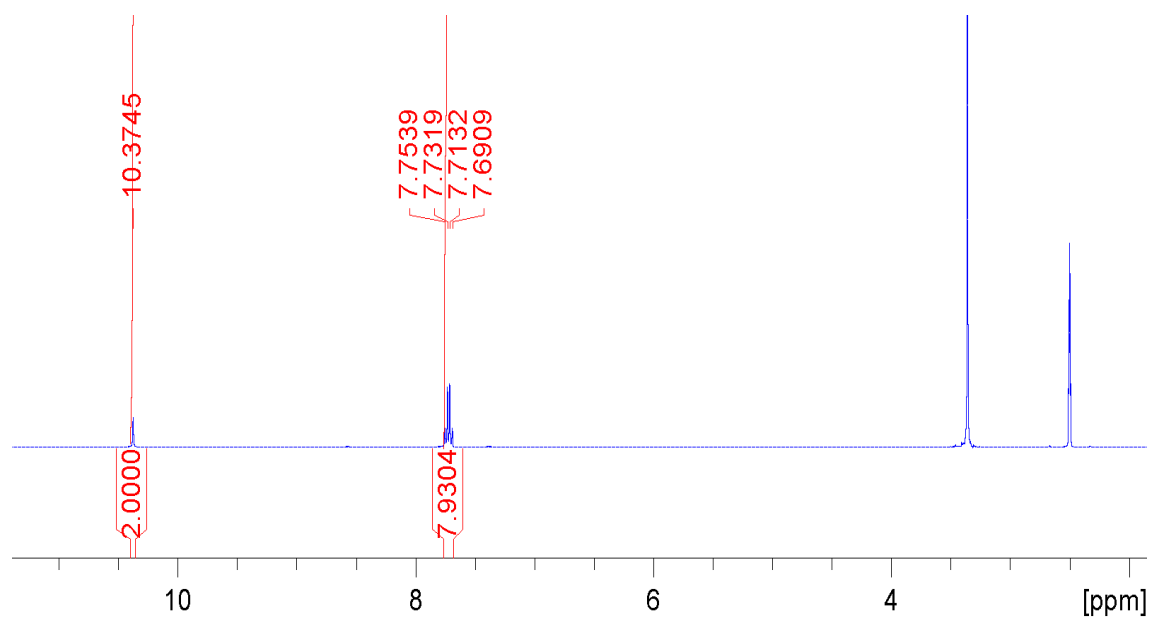

Figure S1: <sup>1</sup>H NMR spectra of compound **1** in DMSO-*d*<sub>6</sub> conducted at 298 K.

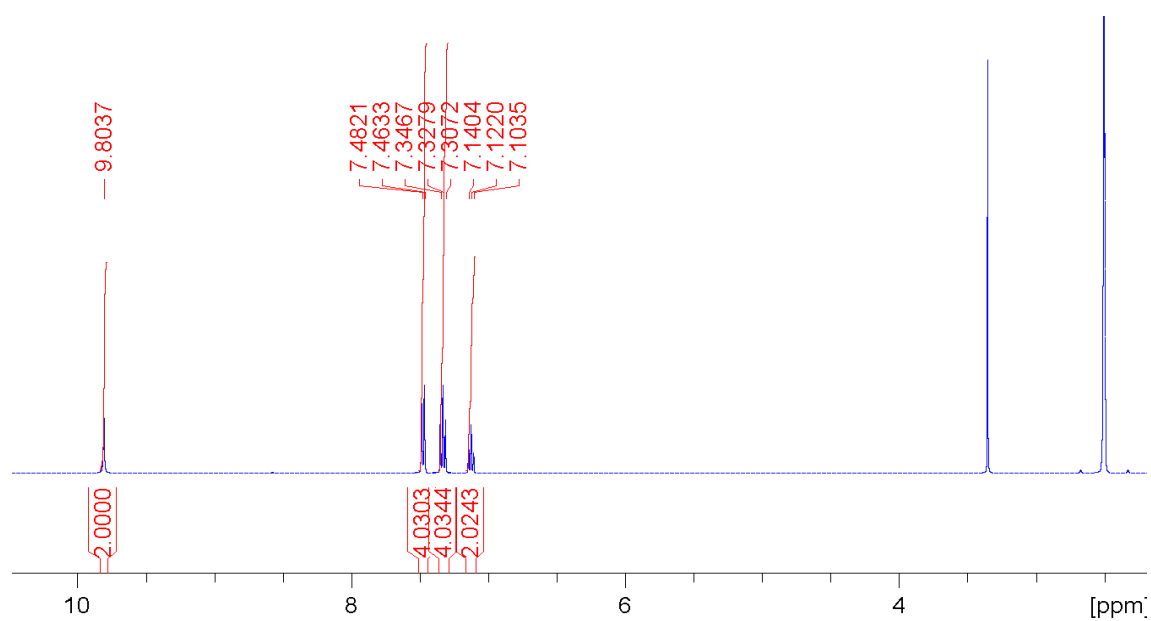

Figure S2: <sup>1</sup>H NMR spectra of compound **2** in DMSO-*d*<sub>6</sub> conducted at 298 K.

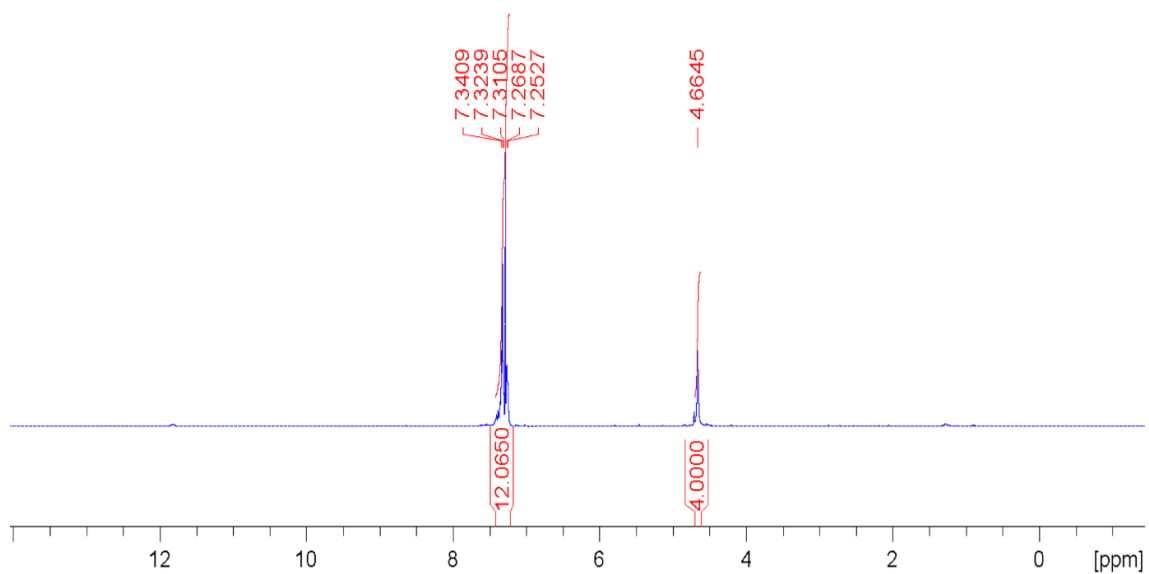

Figure S3:  $^1\text{H}$  NMR spectra of compound **3** in  $\text{CDCl}_3$  conducted at 298 K.

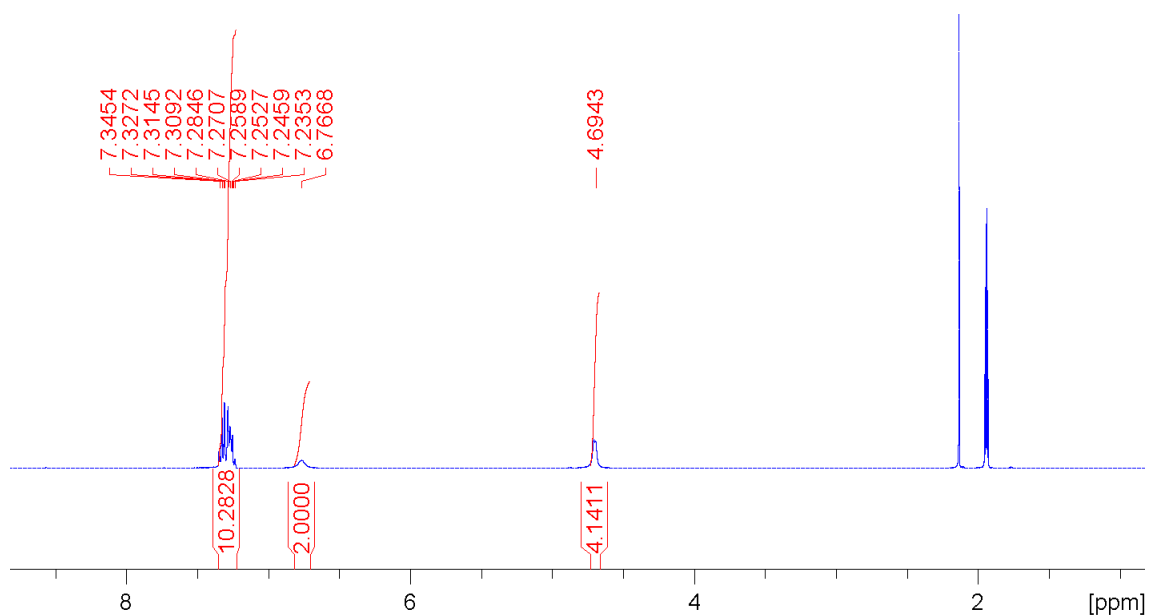

Figure S4:  $^1\text{H}$  NMR spectra of compound **3** in  $\text{CD}_3\text{CN}$  conducted at 298 K.

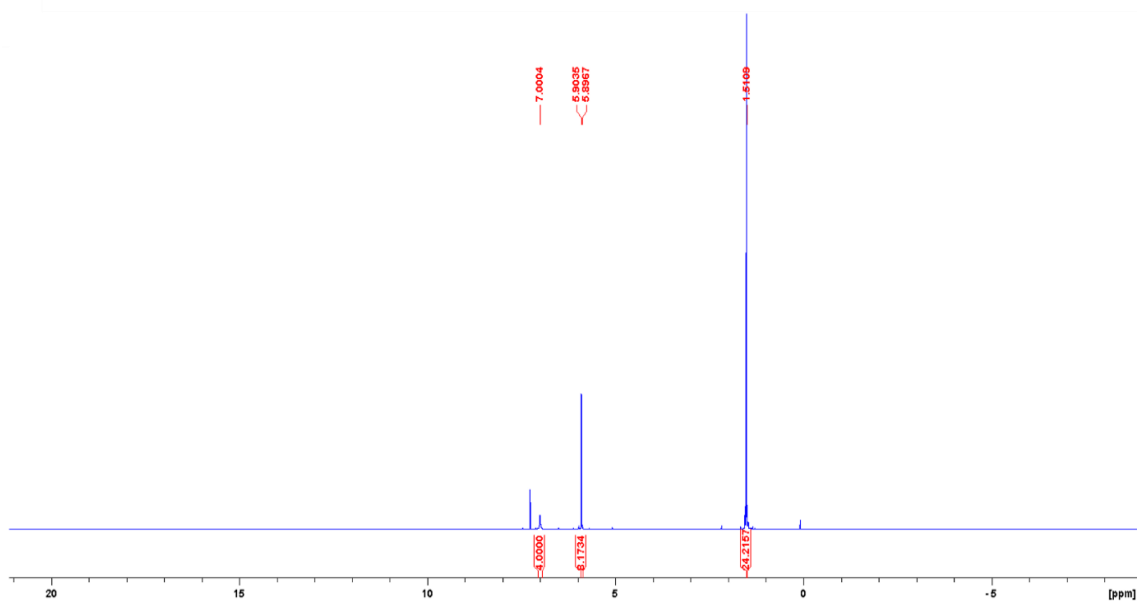

Figure S5:  $^1\text{H}$  NMR spectra of compound **4** in  $\text{CDCl}_3$  conducted at 298 K.

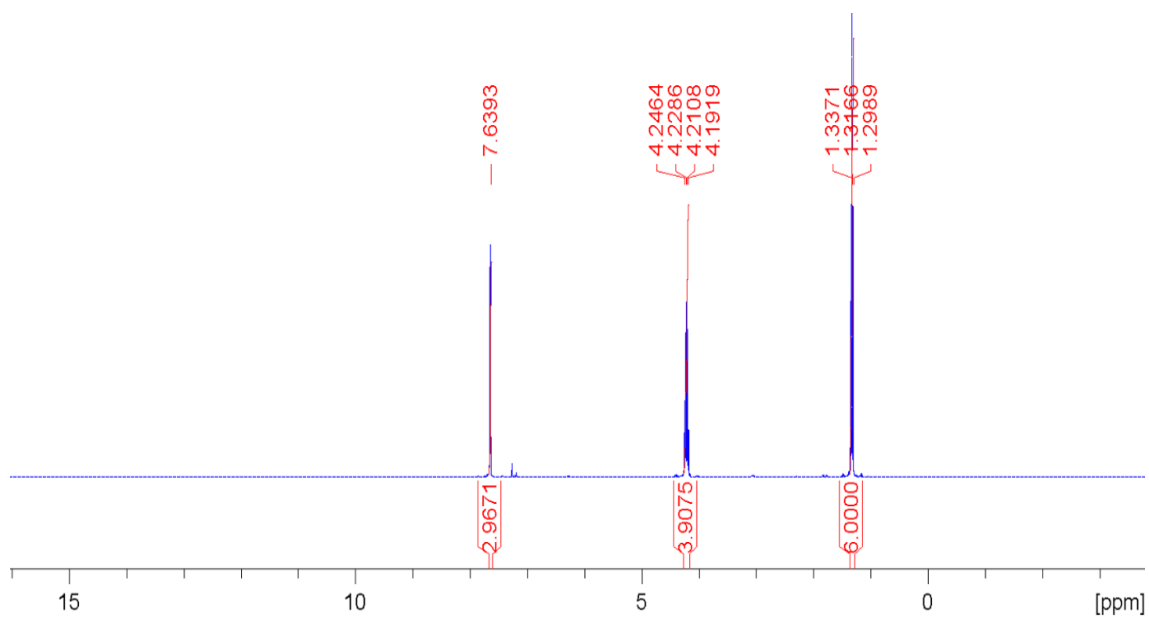

Figure S6:  $^1\text{H}\{^{31}\text{P}\}$  NMR spectra of compound **5** in  $\text{CDCl}_3$  conducted at 298 K.

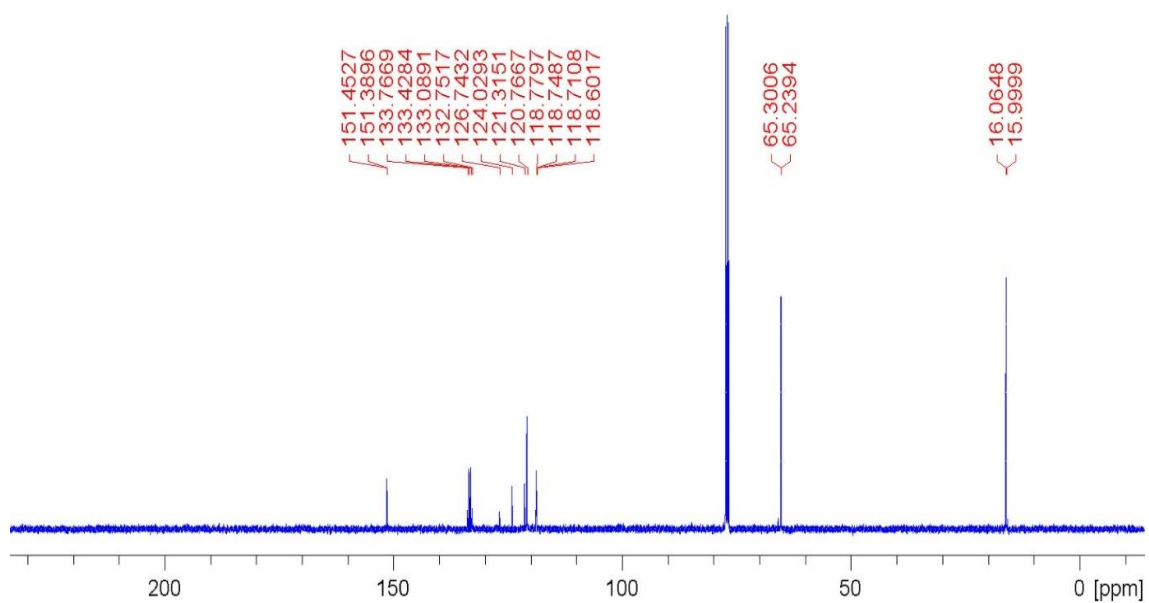

Figure S7:  $^{13}\text{C}\{^1\text{H}\}$  NMR spectra of compound **5** in  $\text{CDCl}_3$  conducted at 298 K.

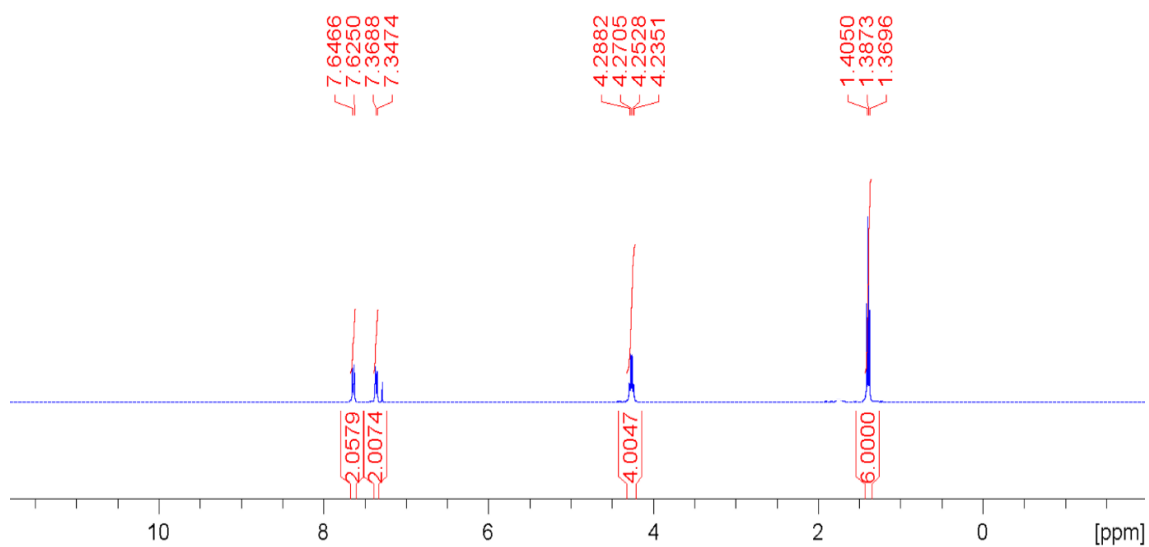

Figure S8:  $^1\text{H}\{^{31}\text{P}\}$  NMR spectra of compound **6** in  $\text{CDCl}_3$  conducted at 298 K.

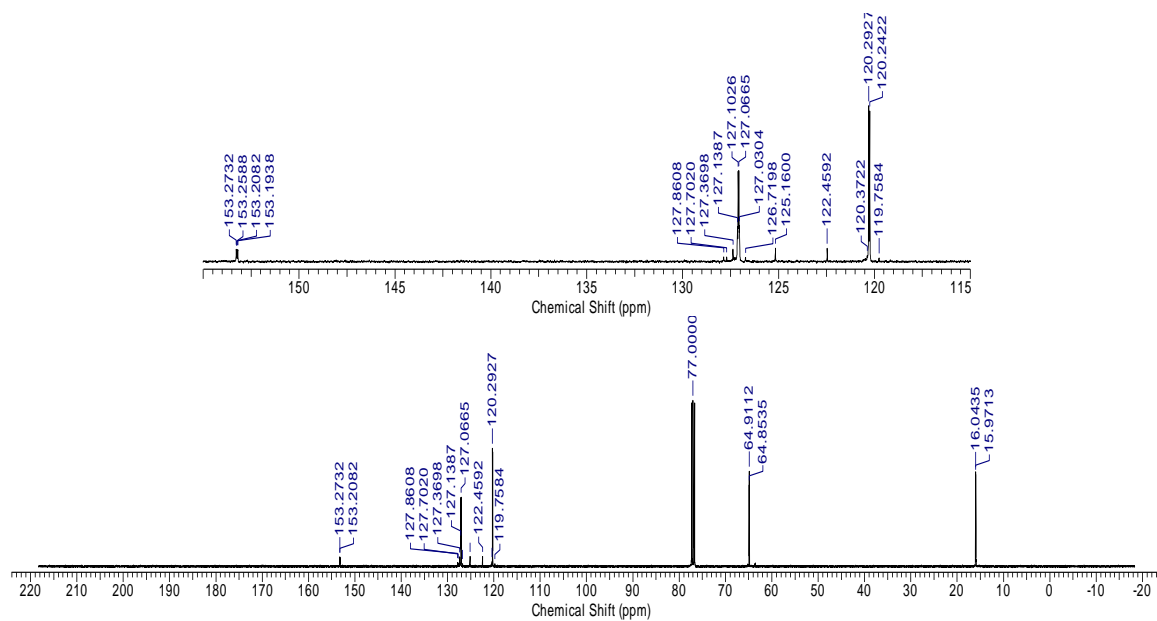

Figure S9:  $^{13}\text{C}\{^1\text{H}\}$  NMR spectra of compound **6** in  $\text{CDCl}_3$  conducted at 298 K.

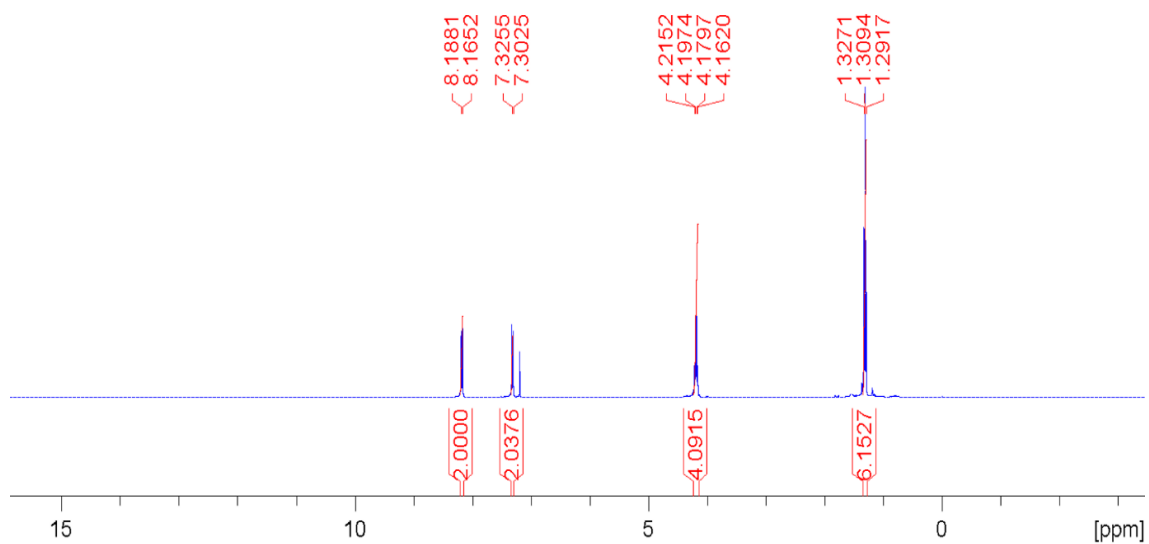

Figure S10:  $^1\text{H}\{^{31}\text{P}\}$  NMR spectra of compound **7** in  $\text{CDCl}_3$  conducted at 298 K.

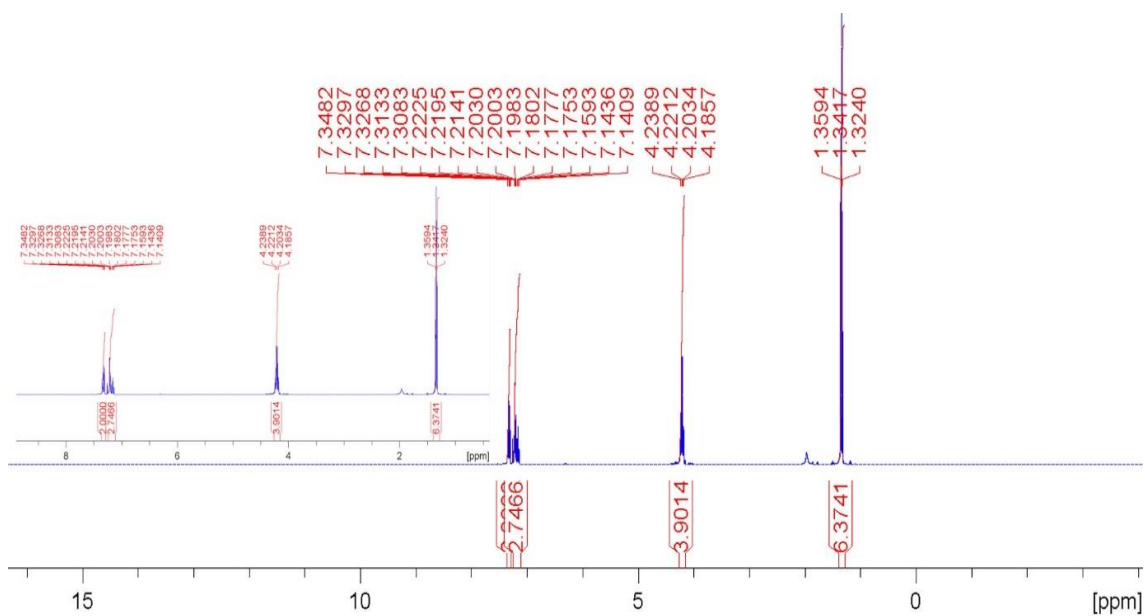

Figure S11: <sup>1</sup>H{<sup>31</sup>P} NMR spectra of compound **8** in CDCl<sub>3</sub> conducted at 298 K.

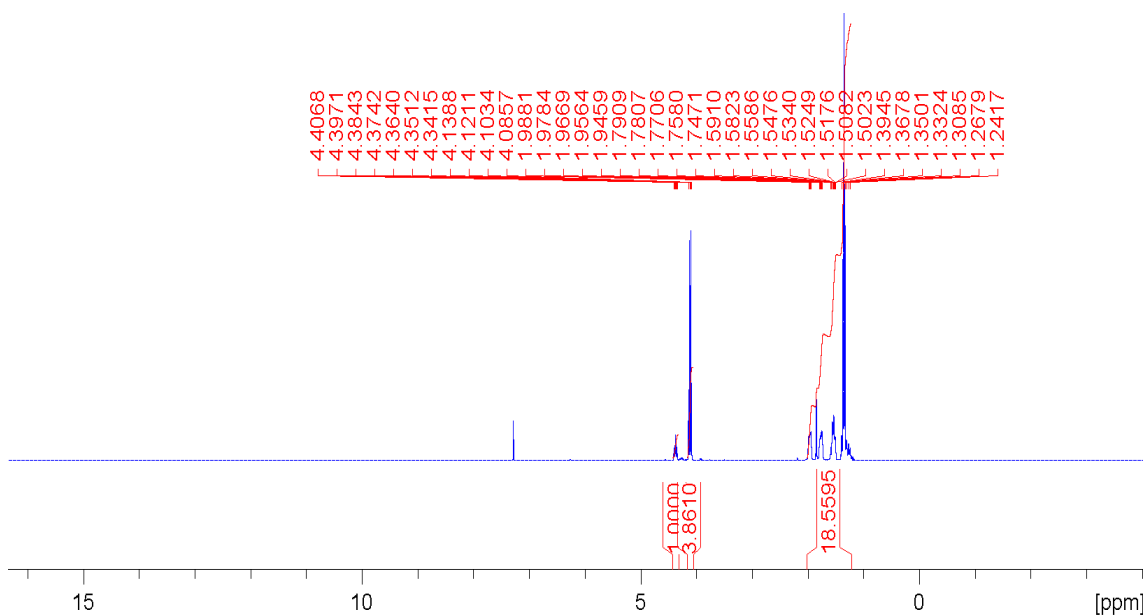

Figure S12: <sup>1</sup>H NMR spectra of **9** in CDCl<sub>3</sub> at 298 K. Residual H<sub>2</sub>O present within the aliphatic region increasing the expected integration by two.

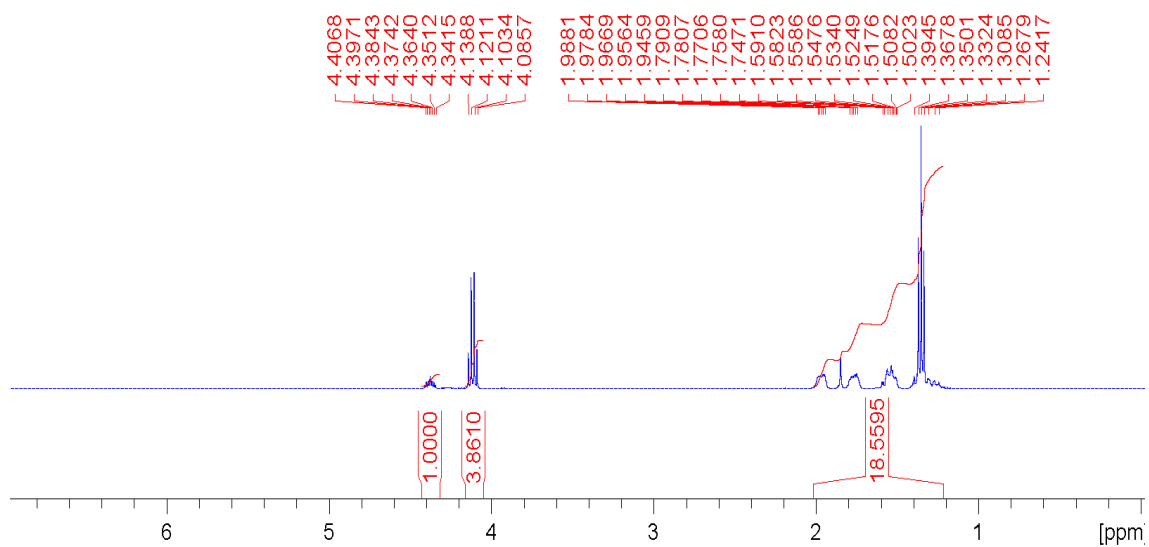

Figure S13: Zoomed in  $^1\text{H}$  NMR spectra of **9** in  $\text{CDCl}_3$  at 298 K. Residual  $\text{H}_2\text{O}$  present within the aliphatic region increasing the expected integration by two.

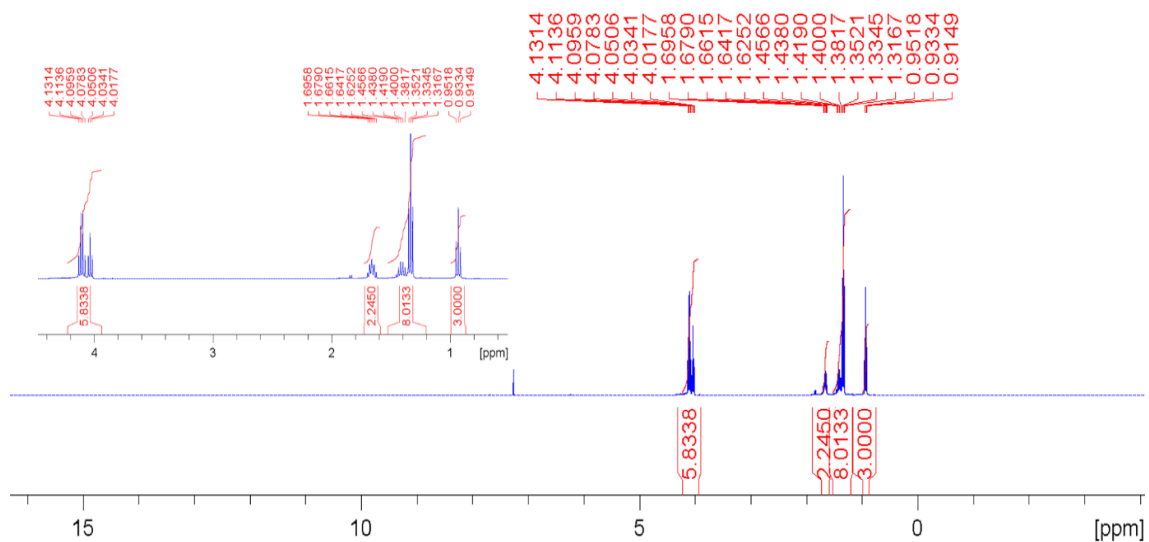

Figure S14:  $^1\text{H}\{^{31}\text{P}\}$  NMR spectra of compound **10** in  $\text{CDCl}_3$  conducted at 298 K.

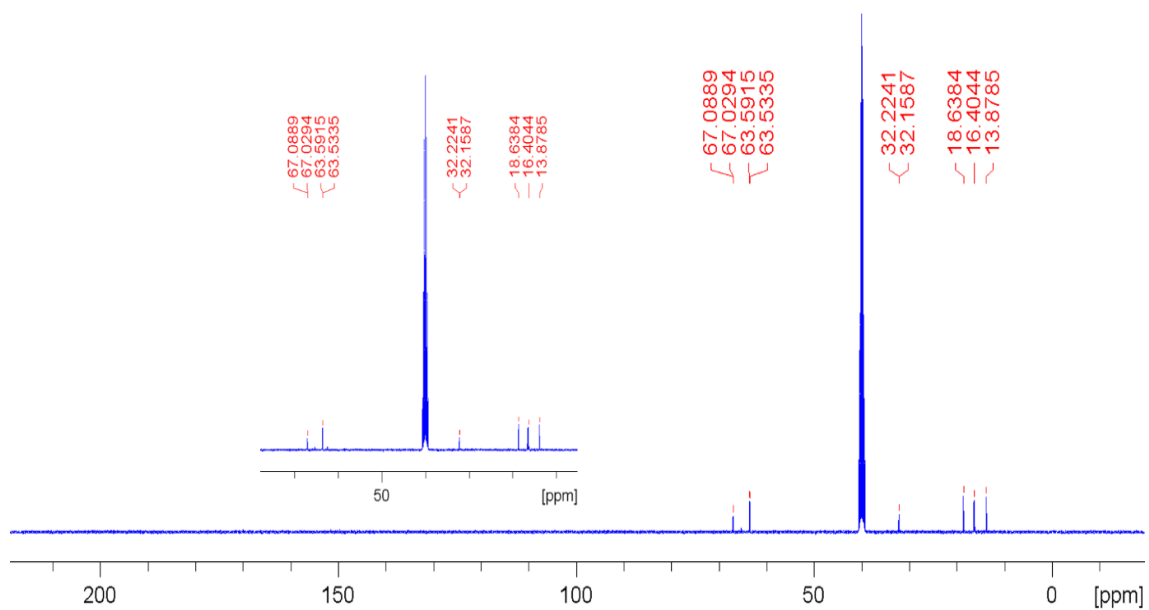

Figure S15:  $^{13}\text{C}\{^1\text{H}\}$  NMR spectra of compound **10** in  $\text{DMSO-}d_6$  conducted at 298 K.

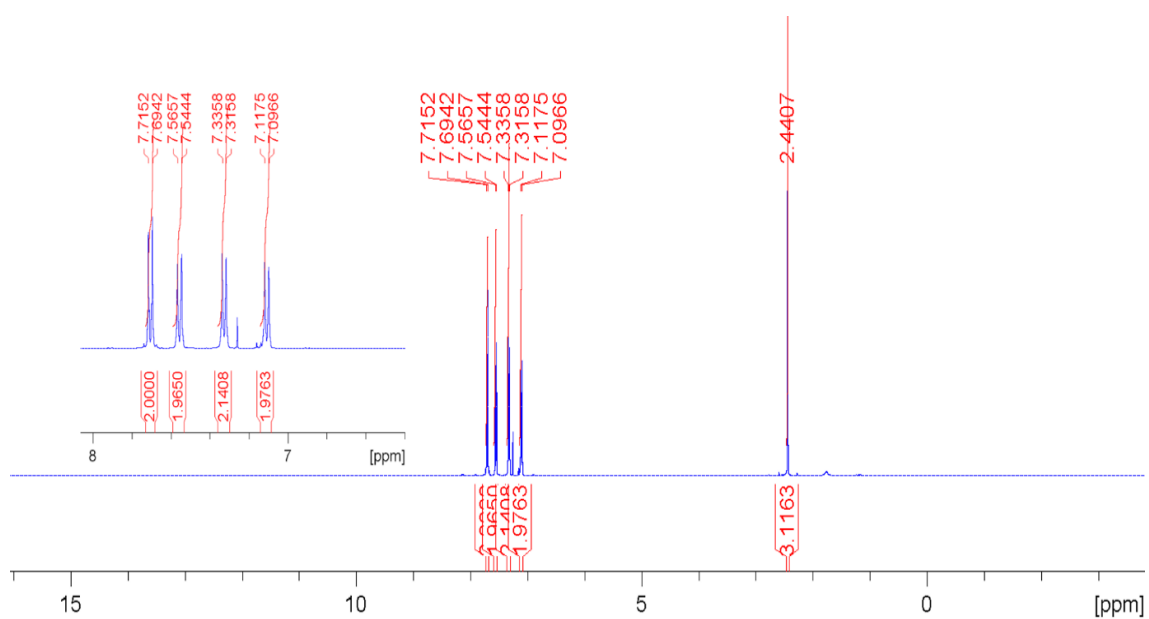

Figure S16:  $^1\text{H}$  NMR spectra of compound **16** in  $\text{CDCl}_3$  conducted at 298 K.





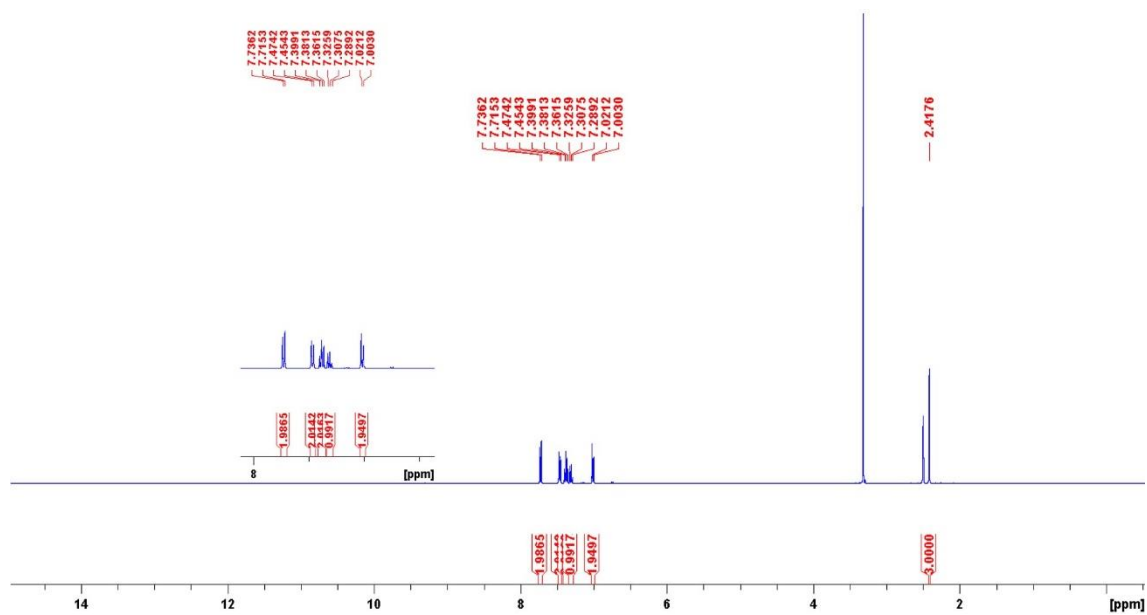

Figure S19:  $^1\text{H}$  NMR spectra of compound **18** in  $\text{DMSO-}d_6$  conducted at 298 K.

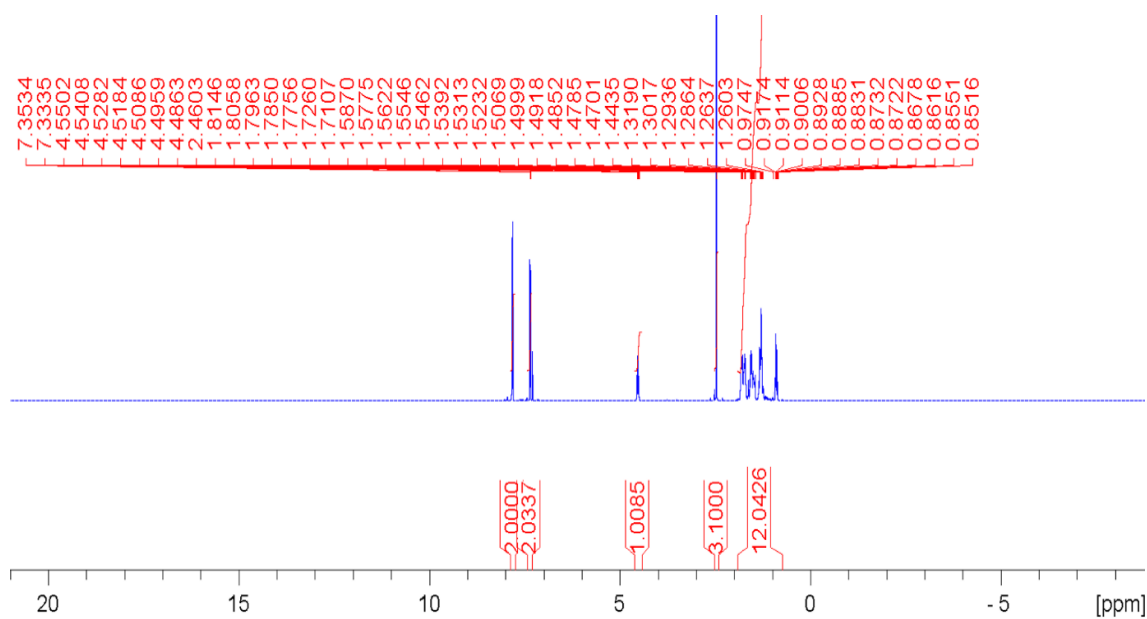

Figure S20:  $^1\text{H}$  NMR spectra of **19** in  $\text{CDCl}_3$  at 298 K.

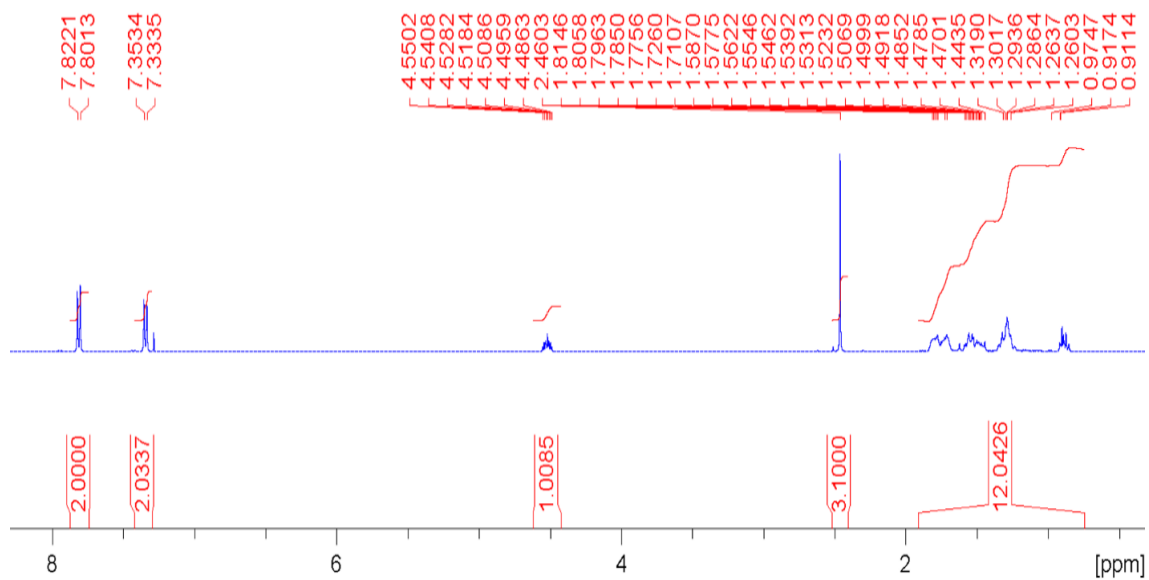

Figure S21: Zoomed in  $^1\text{H}$  NMR spectra of **19** in  $\text{CDCl}_3$  at 298 K.

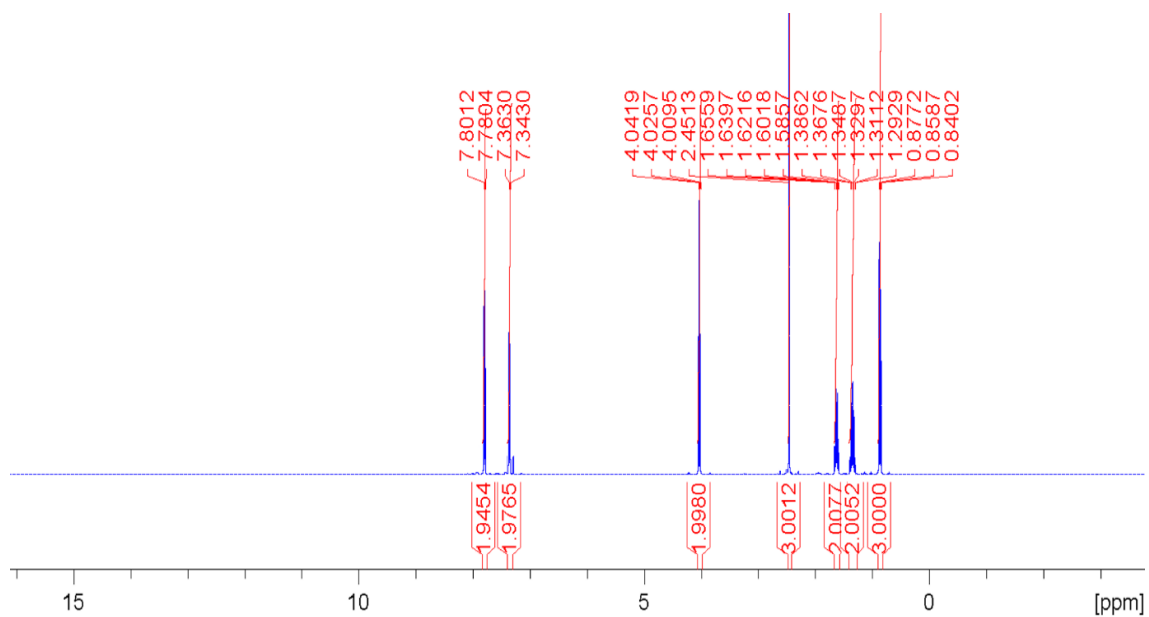

Figure S22:  $^1\text{H}$  NMR spectra of compound **20** in  $\text{CDCl}_3$  conducted at 298 K.

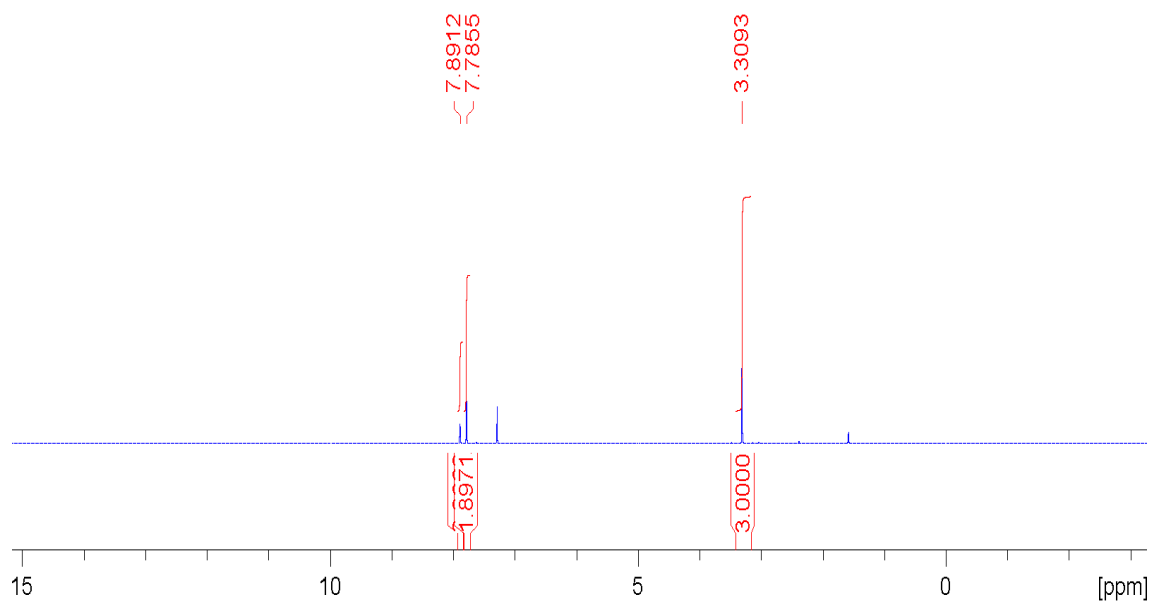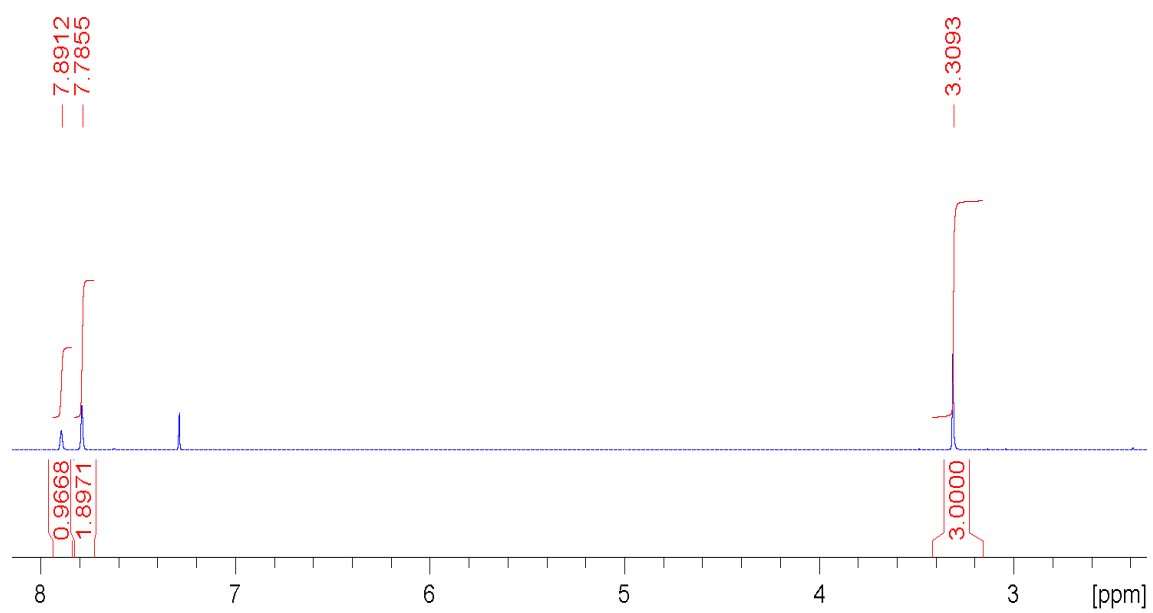

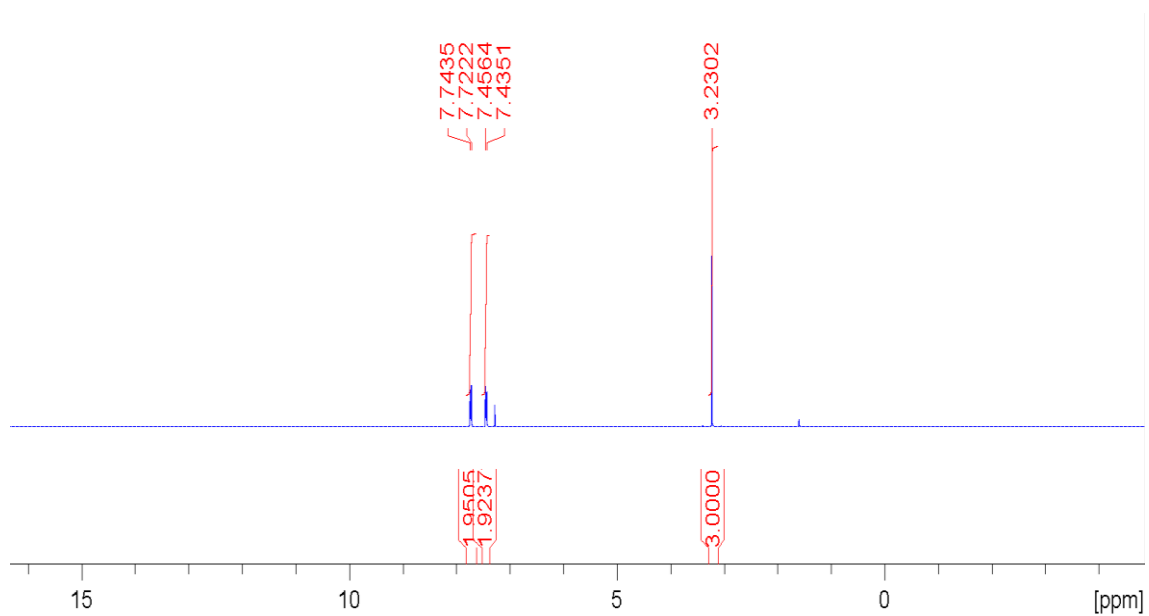

Figure S25:  $^1\text{H}$  NMR spectra of **22** in  $\text{CDCl}_3$  at 298 K.

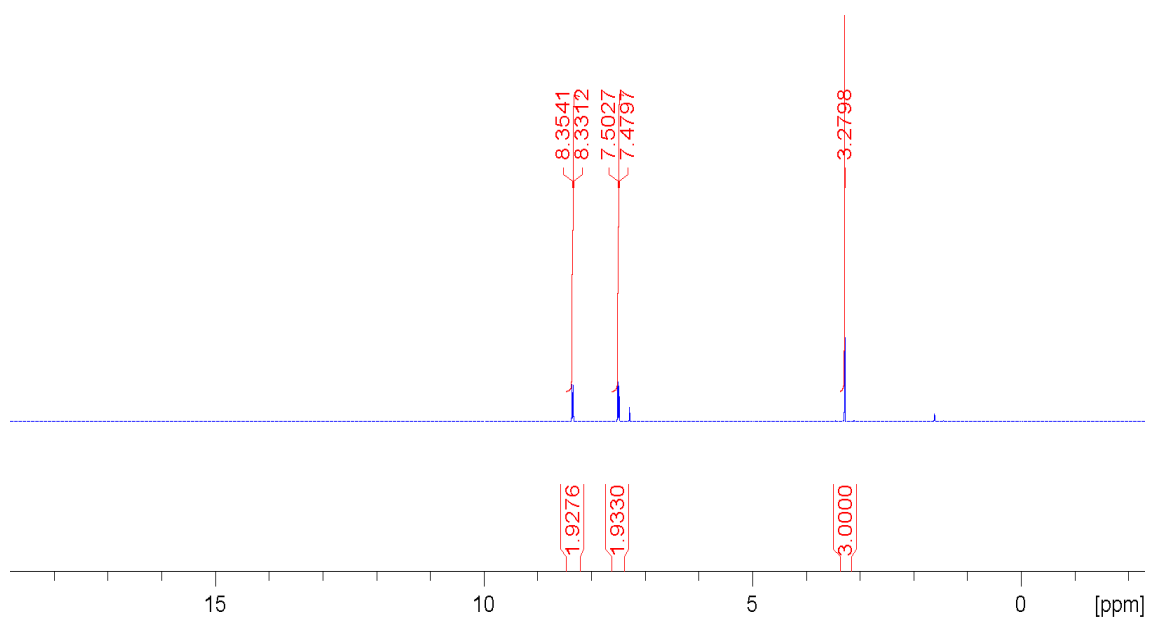

Figure S26:  $^1\text{H}$  NMR spectra of **23** in  $\text{CDCl}_3$  at 298 K.

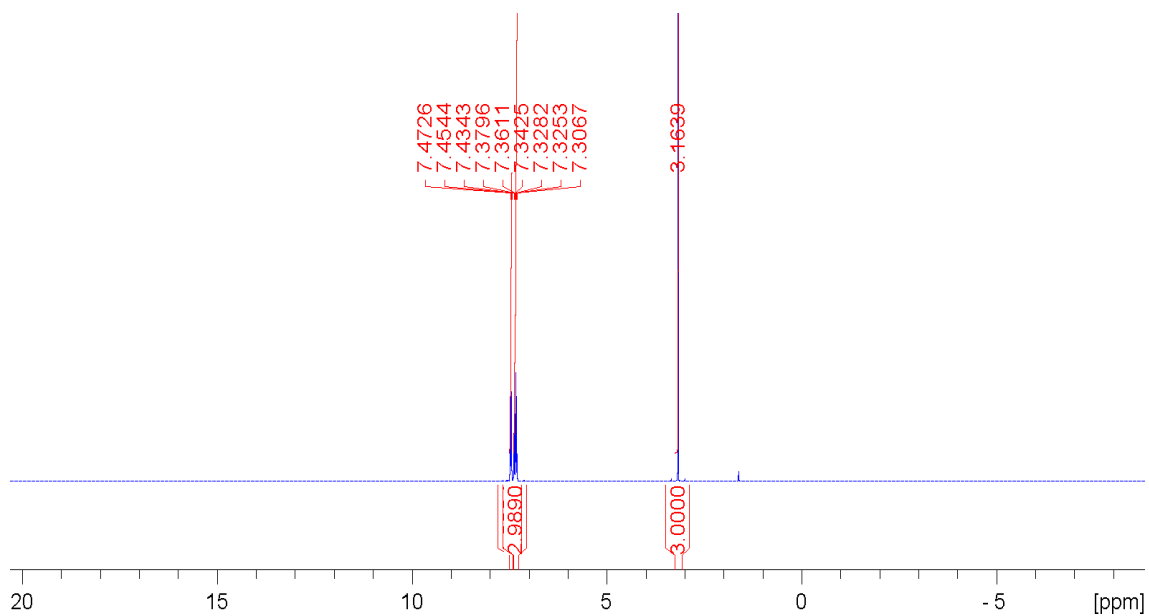

Figure S27:  $^1\text{H}$  NMR spectra of **24** in  $\text{CDCl}_3$  at 298 K.

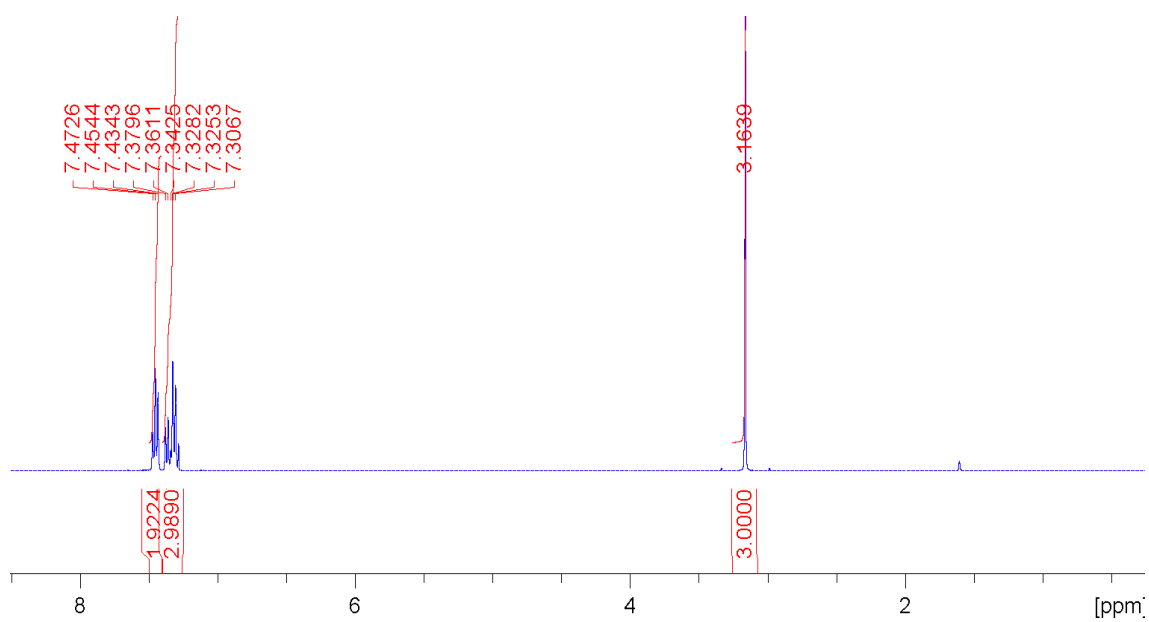

Figure S28: Zoomed in  $^1\text{H}$  NMR spectra of **24** in  $\text{CDCl}_3$  at 298 K.

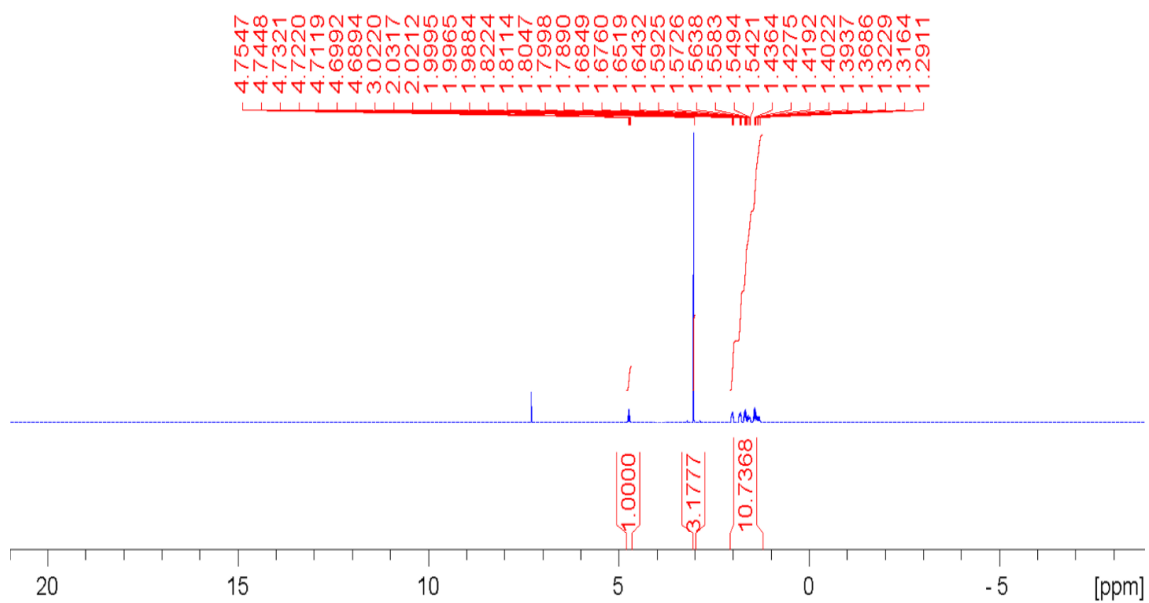

Figure S29:  $^1\text{H}$  NMR spectra of **25** in  $\text{CDCl}_3$  at 298 K.

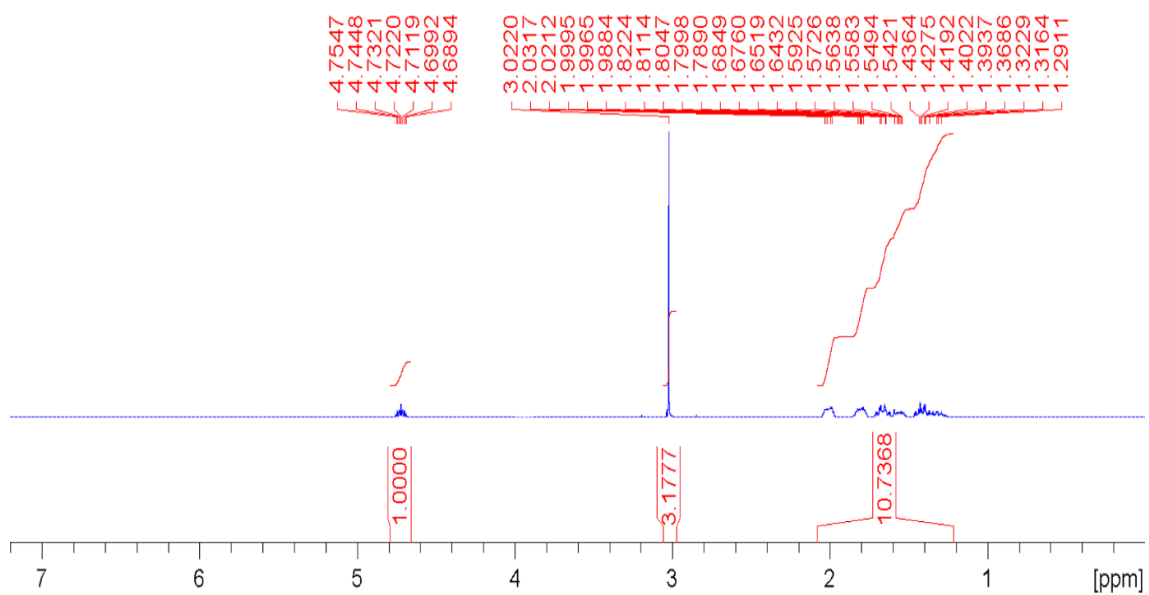

Figure S30: Zoomed in  $^1\text{H}$  NMR spectra of **25** in  $\text{CDCl}_3$  at 298 K.

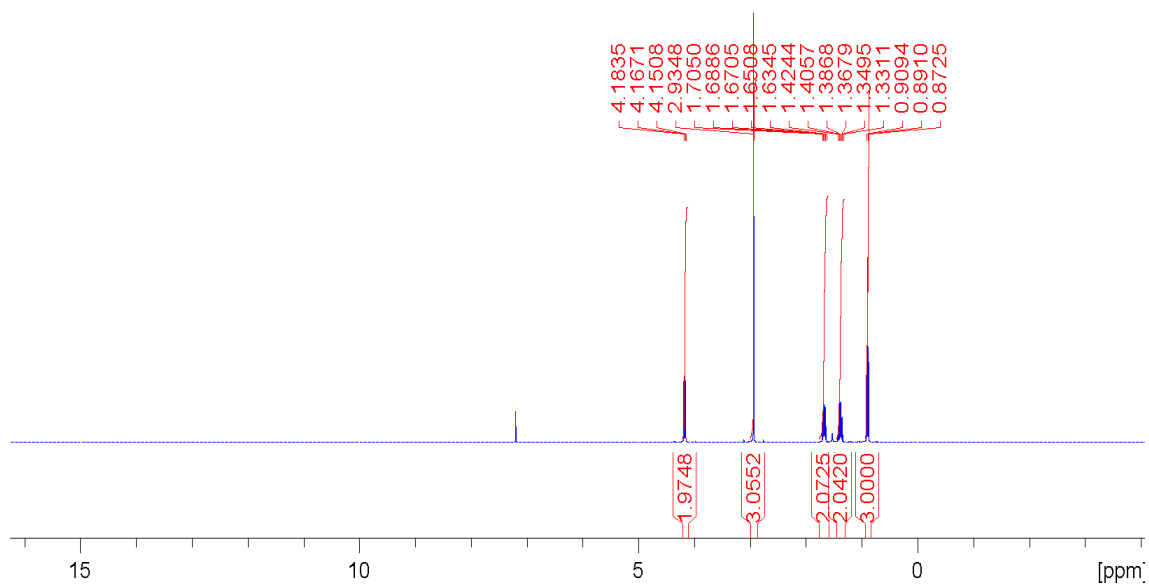

Figure S31:  $^1\text{H}$  NMR spectra of **26** in  $\text{CDCl}_3$  at 298 K.

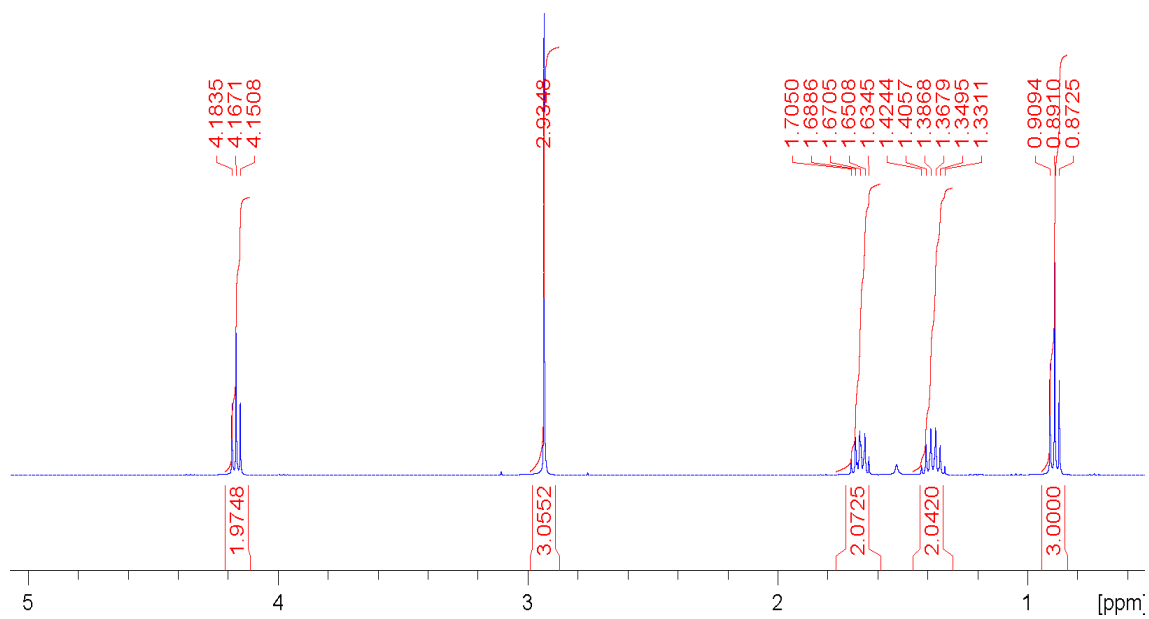

Figure S32: Zoomed in  $^1\text{H}$  NMR spectra of **26** in  $\text{CDCl}_3$  at 298 K.



## $^1\text{H}$ NMR titration results

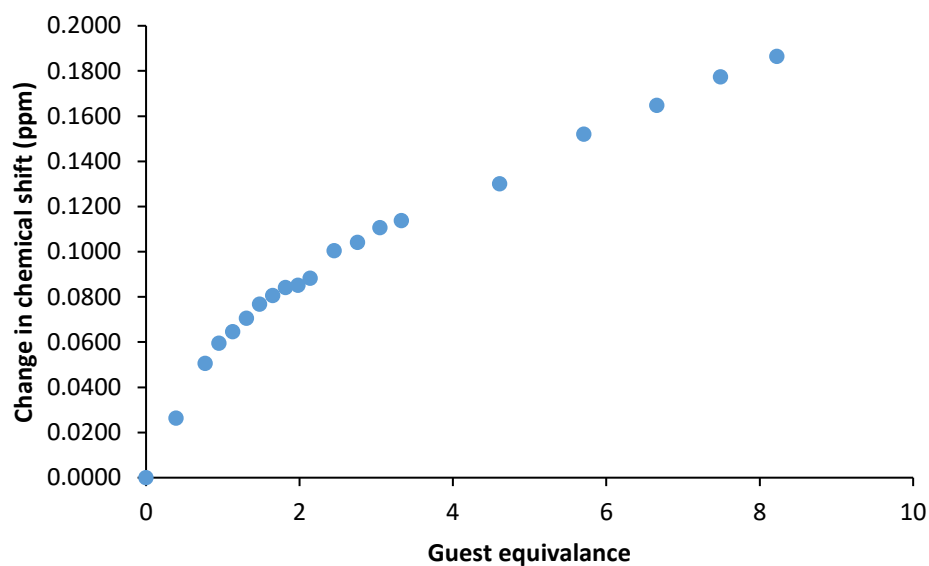

Figure S33: Change in chemical shift for the NH resonance of **1** (host) upon the addition of **5** (guest) in  $\text{CD}_3\text{CN}$  at 298 K.  $K_{\text{ass}} = 36.23 \text{ M}^{-1} \pm 6.27 \%$ .

Bindfit link: <http://app.supramolecular.org/bindfit/view/d3e53f5f-0820-41cb-bce8-157734b6a3c6>

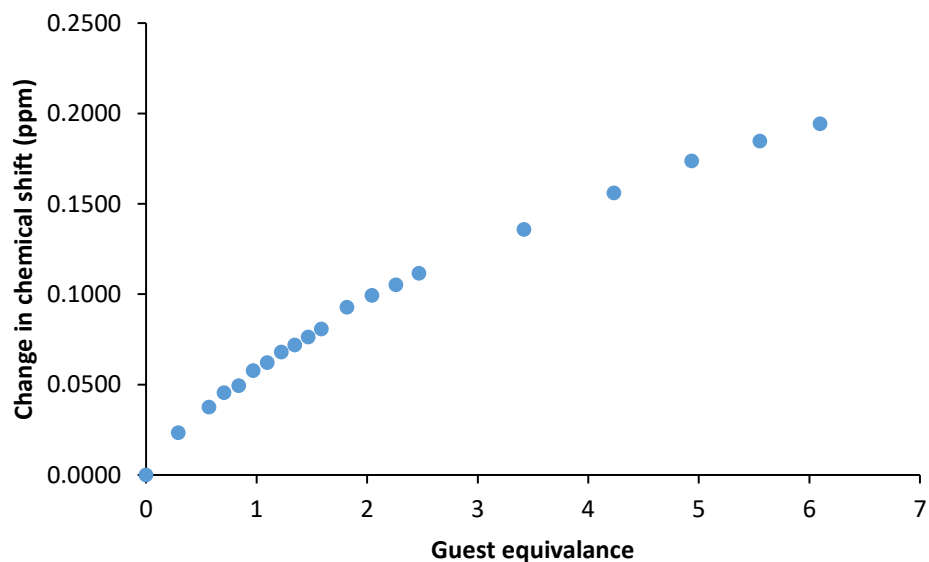

Figure S34: Change in chemical shift for the NH resonance of **1** (host) upon the addition of **6** (guest) in  $\text{CD}_3\text{CN}$  at 298 K.  $K_{\text{ass}} = 17.05 \text{ M}^{-1} \pm 1.18 \%$ .

Bindfit link: <http://app.supramolecular.org/bindfit/view/ce076885-b08d-447a-a86d-170d30bff745>

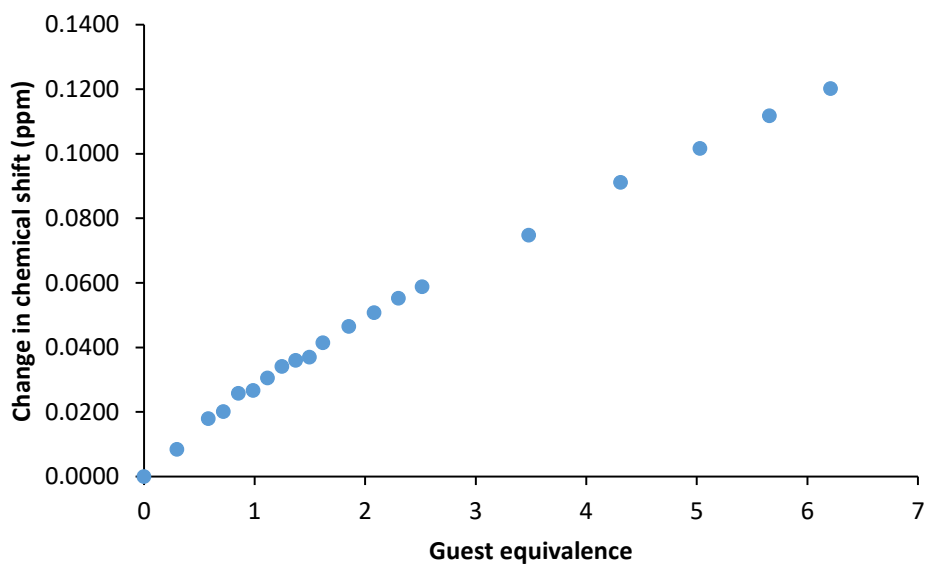

Figure S35: Change in chemical shift for the NH resonance of **1** (host) upon the addition of **7** (guest) in CD<sub>3</sub>CN at 298 K.  $K_{ass} = 7.65 \text{ M}^{-1} \pm 1.41 \%$ .

Bindfit link: <http://app.supramolecular.org/bindfit/view/0b460b86-0754-4ce5-88f9-49c7e2df295c>

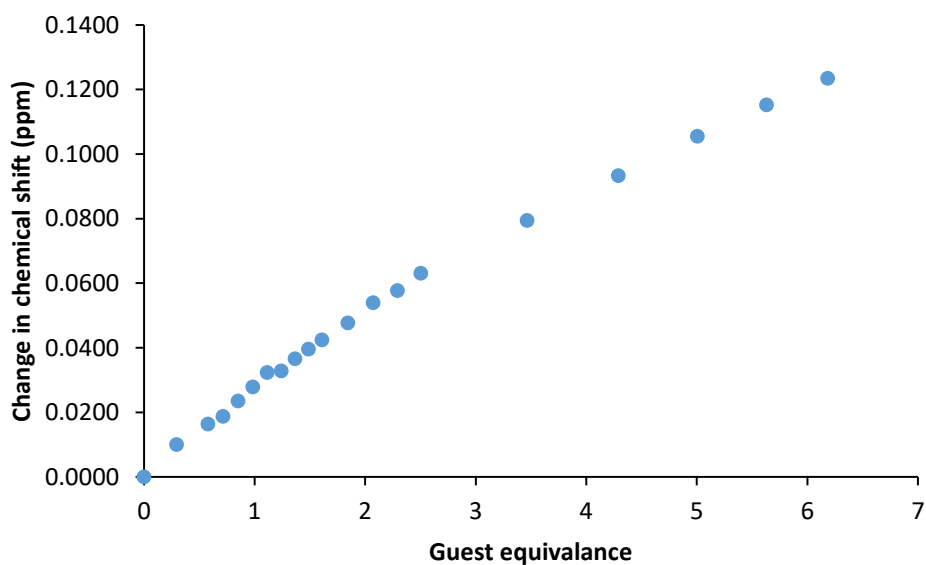

Figure S36: Change in chemical shift for the NH resonance of **1** (host) upon the addition of **8** (guest) in CD<sub>3</sub>CN at 298 K.  $K_{ass} = 9.01 \text{ M}^{-1} \pm 1.07 \%$ .

Bindfit link: <http://app.supramolecular.org/bindfit/view/0c5b133c-b224-4a73-8c31-e604d6ecd956>

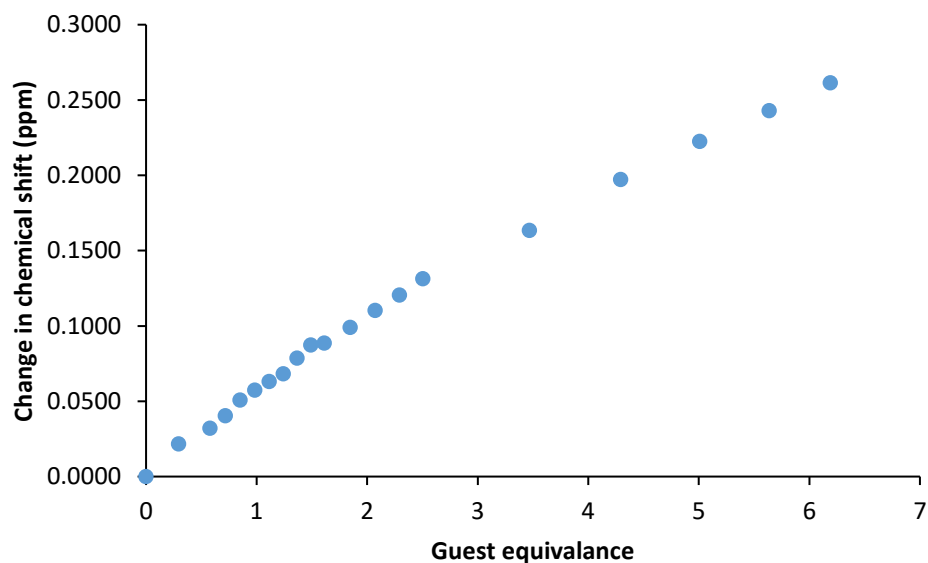

Figure S37: Change in chemical shift for the NH resonance of **1** (host) upon the addition of **9** (guest) in CD<sub>3</sub>CN at 298 K.  $K_{ass} = 8.06 \text{ M}^{-1} \pm 1.26 \%$ .

Bindfit link: <http://app.supramolecular.org/bindfit/view/38ae6a9a-f202-459e-934d-9525ea1eafe6>

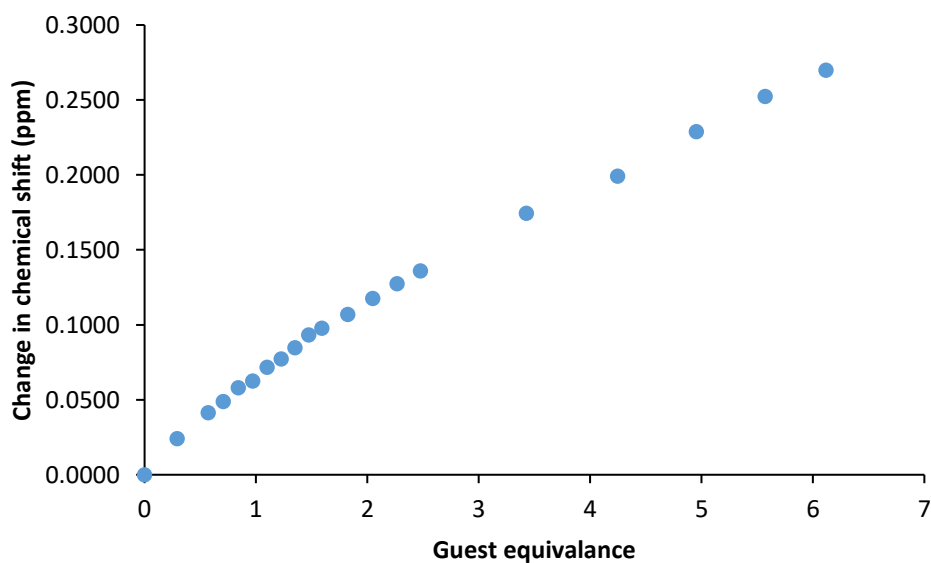

Figure S38: Change in chemical shift for the NH resonance of **1** (host) upon the addition of **10** (guest) in CD<sub>3</sub>CN at 298 K.  $K_{ass} = 9.40 \text{ M}^{-1} \pm 1.58 \%$ .

Bindfit link: <http://app.supramolecular.org/bindfit/view/763f2ac2-6c56-4fea-8f1a-95a01b6206b2>

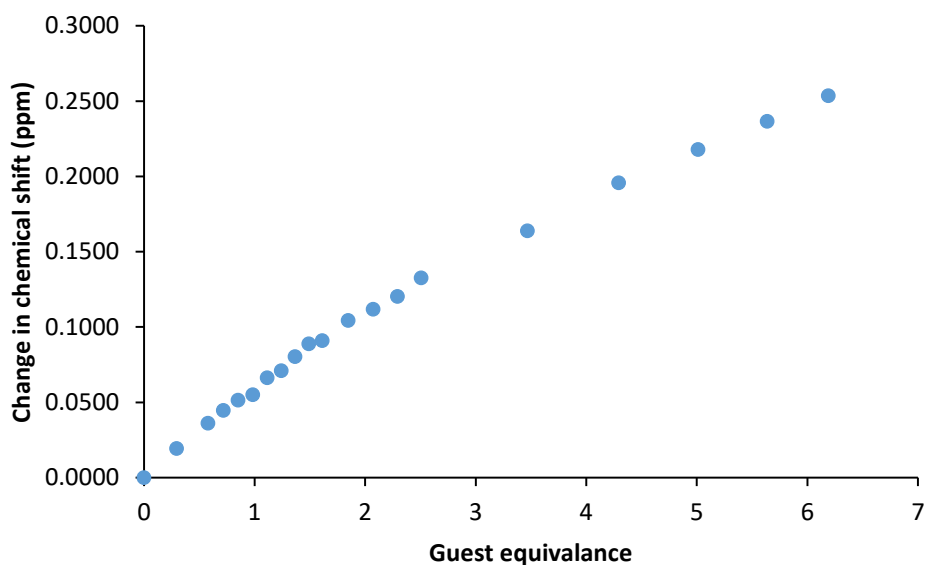

Figure S39: Change in chemical shift for the NH resonance for **1** (host) upon the addition of **11** (guest) in CD<sub>3</sub>CN at 298 K.  $K_{ass} = 10.99 \text{ M}^{-1} \pm 1.23 \%$ .

Bindfit link: <http://app.supramolecular.org/bindfit/view/11cabb05-29a8-423b-afd8-f5842f895a29>

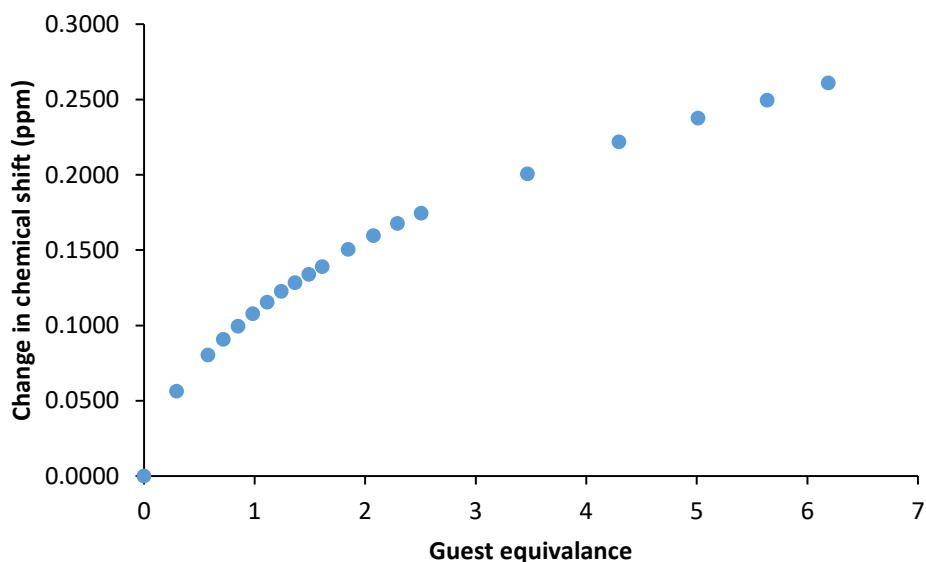

Figure S40: Change in chemical shift for the NH resonance for **1** (host) upon the addition of **12** (guest) in CD<sub>3</sub>CN at 298 K.  $K_{ass} = 51.82 \text{ M}^{-1} \pm 5.73 \%$ .

Bindfit link: <http://app.supramolecular.org/bindfit/view/3caad220-a2c3-4733-8d8f-1f69889d2fd0>

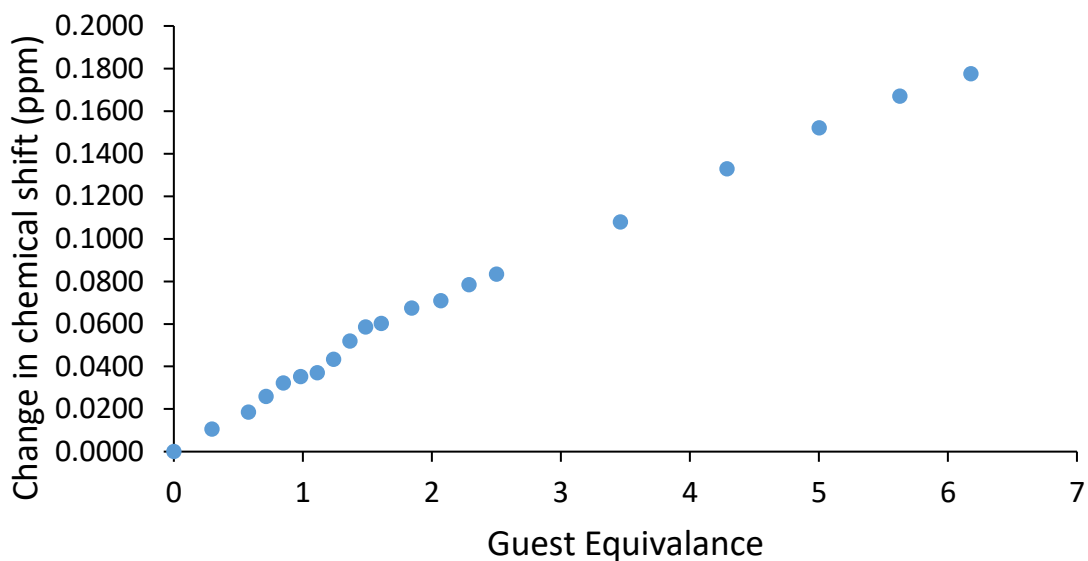

Figure S41: Change in chemical shift for the NH resonance of **1** (host) upon the addition of **13** (guest) in CD<sub>3</sub>CN at 298 K.  $K_{\text{ass}} = 5.52 \text{ M}^{-1} \pm 1.8257\%$ .

Bindfit link: <http://app.supramolecular.org/bindfit/view/512087b6-a539-452f-a9ba-2f4ddd672556>

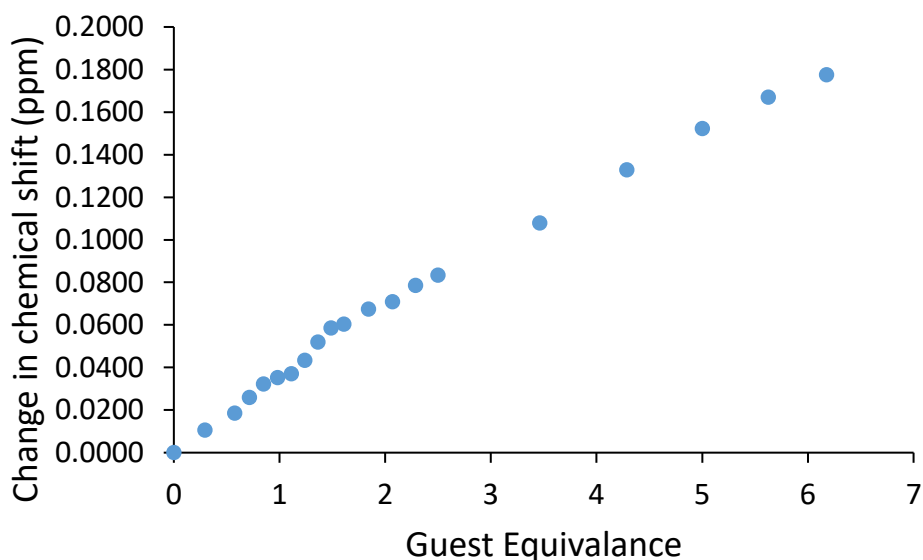

Figure S42: Change in chemical shift for the NH resonance of **1** (host) upon the addition of **14** (guest) in CD<sub>3</sub>CN at 298 K.  $K_{\text{ass}} = 6.42 \text{ M}^{-1} \pm 1.8261\%$ .

Bindfit link: <http://app.supramolecular.org/bindfit/view/78d2596d-6e0a-4c8d-928f-fb27a33d9e48>

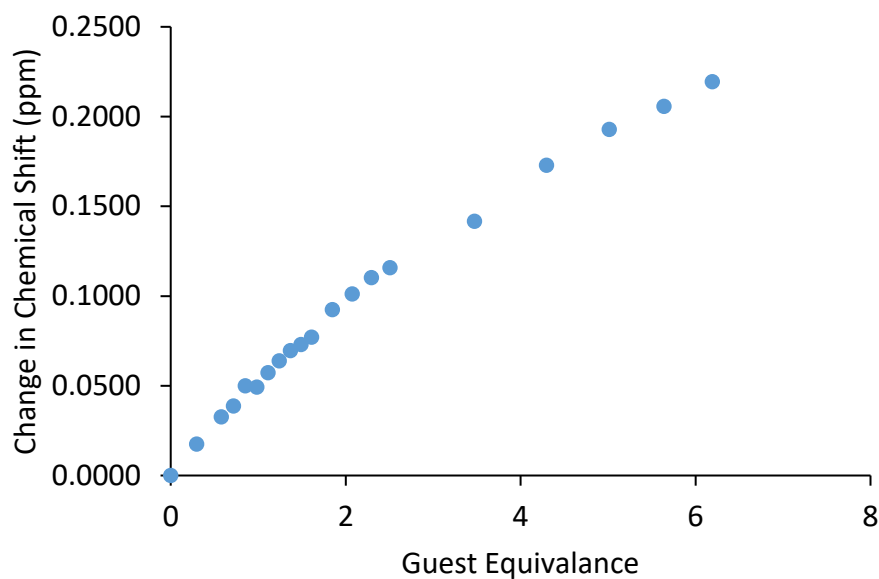

Figure S43: Change in chemical shift for the NH resonance of **1** (host) upon the addition of **15** (guest) in CD<sub>3</sub>CN at 298 K.  $K_{ass} = 11.73 \text{ M}^{-1} \pm 1.6087\%$ .

Bindfit link: <http://app.supramolecular.org/bindfit/view/aa2cacf0-ce0a-4c3f-a4f0-8f355b318757>

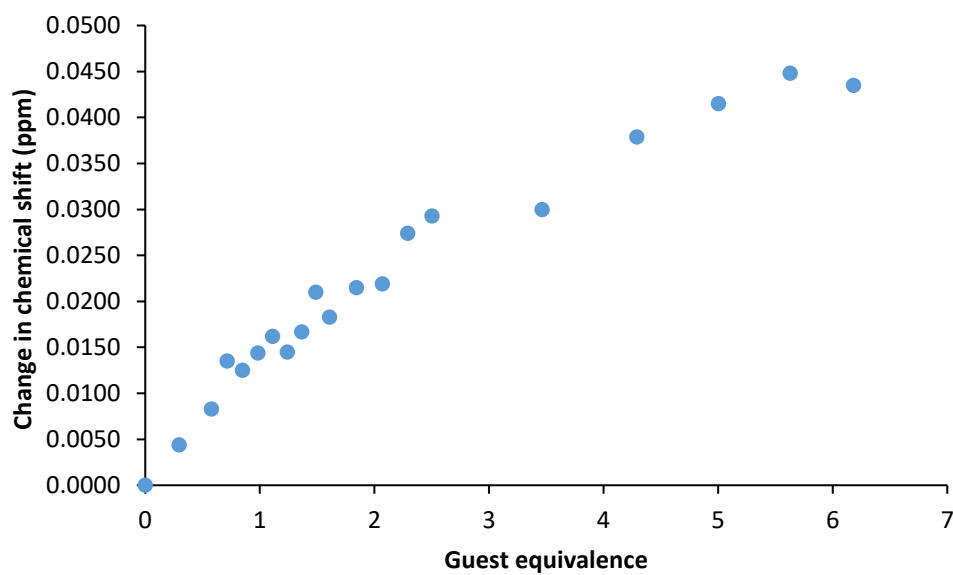

Figure S44: Change in chemical shift for the NH resonance for **1** (host) upon the addition of **16** (guest) in CD<sub>3</sub>CN at 298 K.  $K_{ass} = 25.48 \text{ M}^{-1} \pm 6.7612 \%$ .

Bindfit link: <http://app.supramolecular.org/bindfit/view/f15d44d5-ae97-426d-a6c2-0c354641444c>

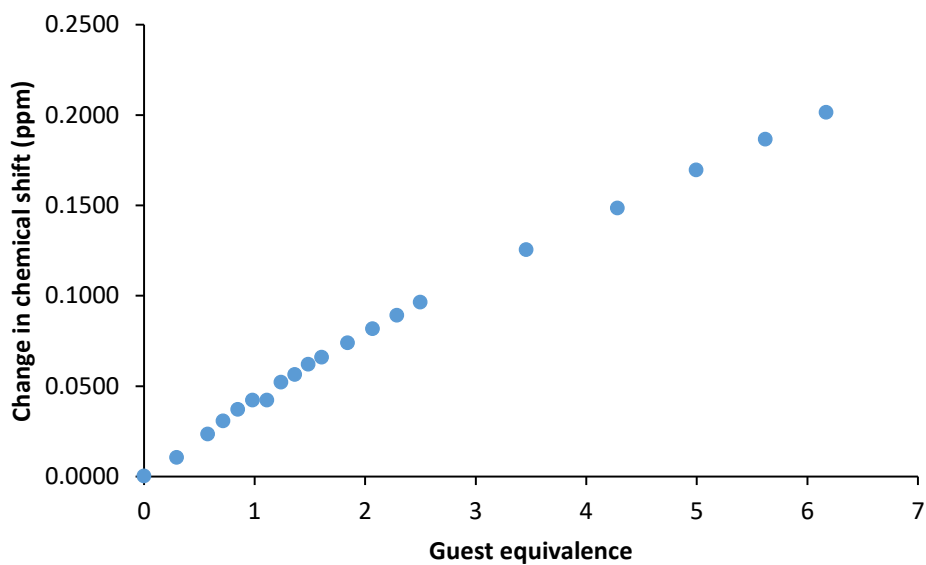

Figure S45: Change in chemical shift for the NH resonance for **1** (host) upon the addition of **17** (guest) in CD<sub>3</sub>CN at 298 K.  $K_{ass} = 6.62 \text{ M}^{-1} \pm 1.05 \%$ .

Bindfit link: <http://app.supramolecular.org/bindfit/view/0c7ec2db-9812-4b5e-b2ee-d0cc6e5509ff>

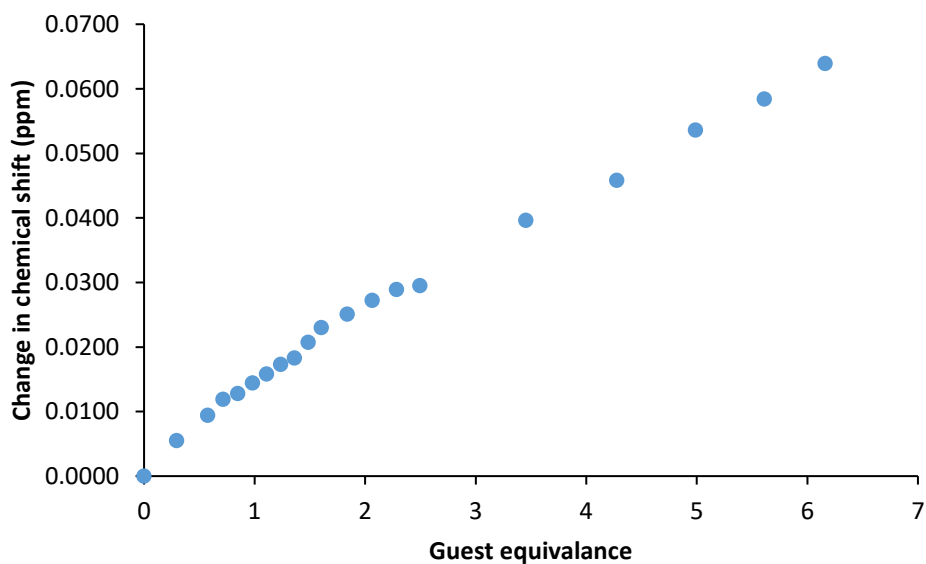

Figure S46: Change in chemical shift for the NH resonance for **1** (host) upon the addition of **18** (guest) in CD<sub>3</sub>CN at 298 K.  $K_{ass} = 6.68 \text{ M}^{-1} \pm 2.14 \%$ .

Bindfit link: <http://app.supramolecular.org/bindfit/view/14708252-2d56-468a-a787-b9ce2633f96a>

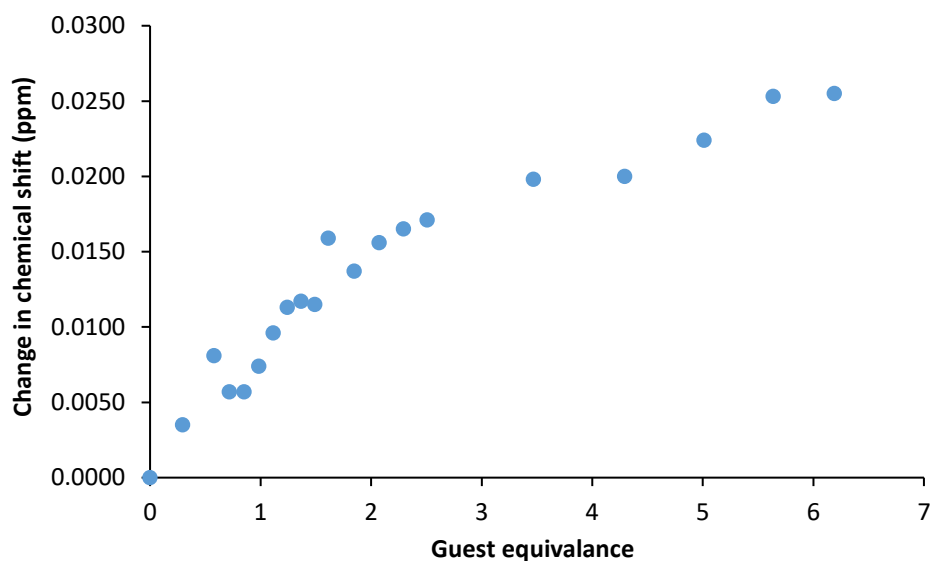

Figure S47: Change in chemical shift for the NH resonance of **1** (host) upon the addition of **19** (guest) in CD<sub>3</sub>CN at 298 K.  $K_{ass} = 48.16 \text{ M}^{-1} \pm 10.77 \%$ .

Bindfit link: <http://app.supramolecular.org/bindfit/view/36b5a7a0-f745-4184-86b3-8d9cefd66414>

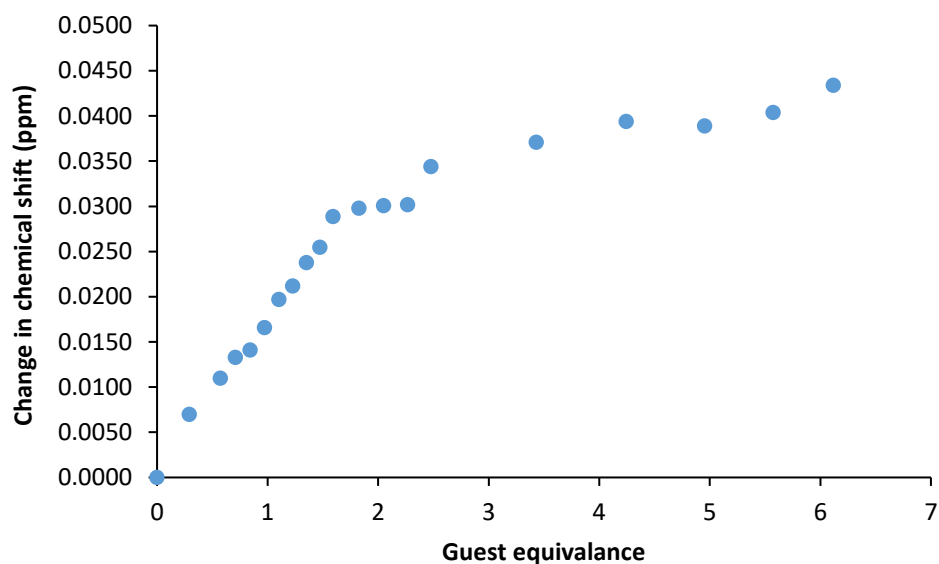

Figure S48: Change in chemical shift for the NH resonance for **1** (host) upon the addition of **20** (guest) in CD<sub>3</sub>CN at 298 K.  $K_{ass} = 106.25 \text{ M}^{-1} \pm 8.39 \%$ .

Bindfit link: <http://app.supramolecular.org/bindfit/view/a305aa1a-78d0-40bb-9a4d-329131551e8c>



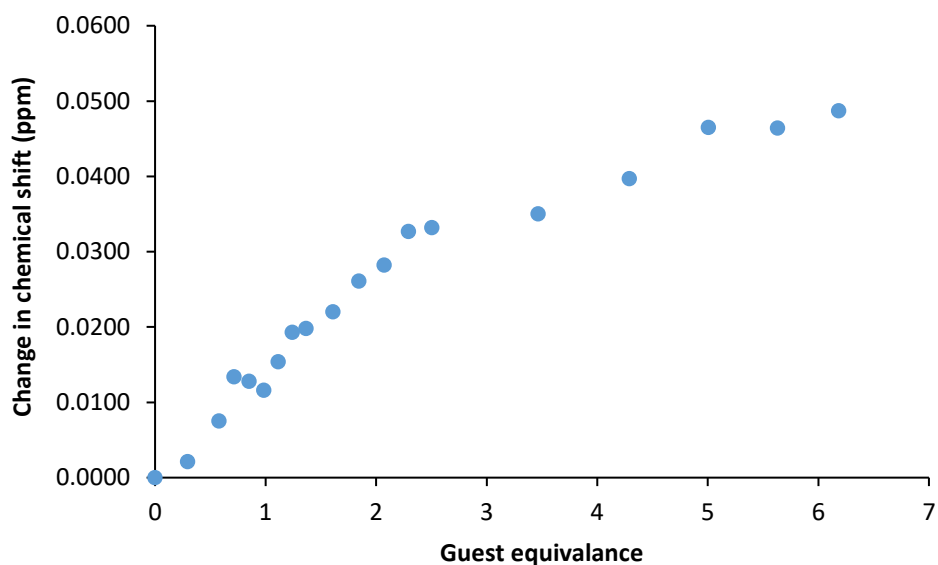

Figure S49: Change in chemical shift for the NH resonance of **1** (host) upon the addition of **21** (guest) in CD<sub>3</sub>CN at 298 K.  $K_{ass} = 40.71 \text{ M}^{-1} \pm 7.49 \%$ .

BindFit link: <http://app.supramolecular.org/bindfit/view/8188c0f2-93d6-467d-acda-460dd2cba42d>

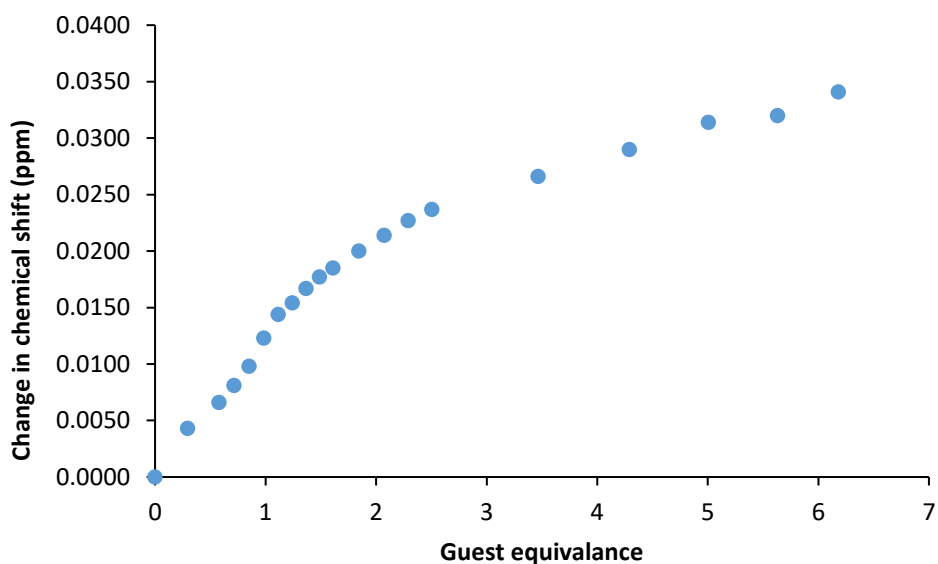

Figure S50: Change in chemical shift for the NH resonance of **1** (host) upon the addition of **22** (guest) in CD<sub>3</sub>CN at 298 K.  $K_{ass} = 63.85 \text{ M}^{-1} \pm 4.71 \%$ .

BindFit link: <http://app.supramolecular.org/bindfit/view/7b3ab354-e64d-4402-a617-6b079312a03d>

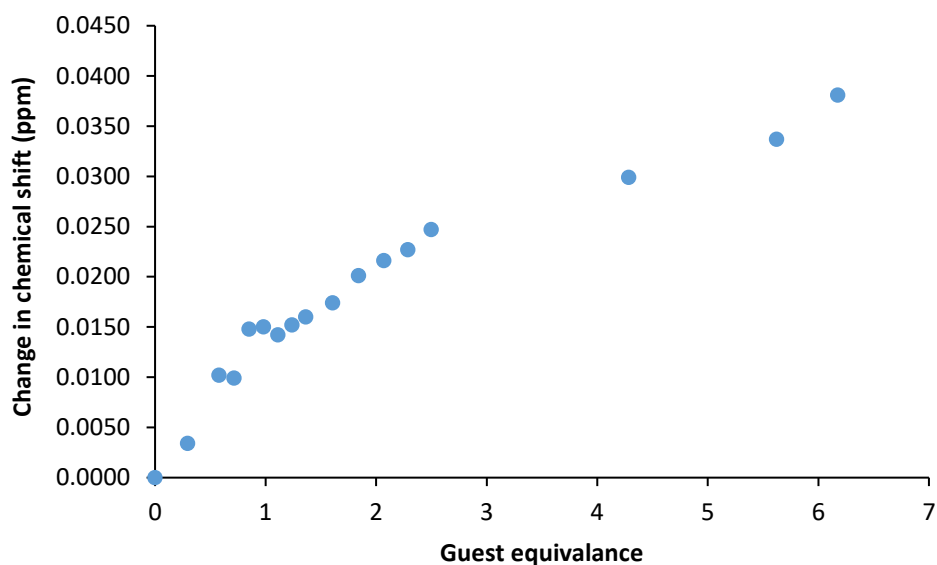

Figure S51: Change in chemical shift for the NH resonance of **1** (host) upon the addition of **23** (guest) in CD<sub>3</sub>CN at 298 K.  $K_{ass} = 45.92 \text{ M}^{-1} \pm 9.40 \%$ .

BindFit link: <http://app.supramolecular.org/bindfit/view/735b8368-12d3-448e-bd48-b88ae4b2706f>

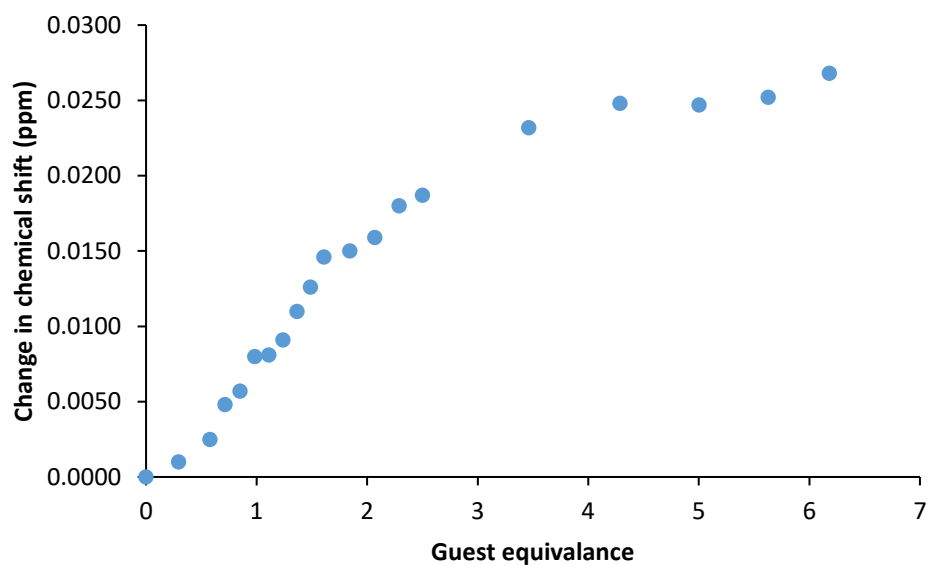

Figure S52: Change in chemical shift for the NH resonance of **1** (host) upon the addition of **24** (guest) in CD<sub>3</sub>CN at 298 K.  $K_{ass} = 75.61 \text{ M}^{-1} \pm 6.28 \%$ .

BindFit link: <http://app.supramolecular.org/bindfit/view/c58dce05-522a-47ad-8fac-f282d82ea662>

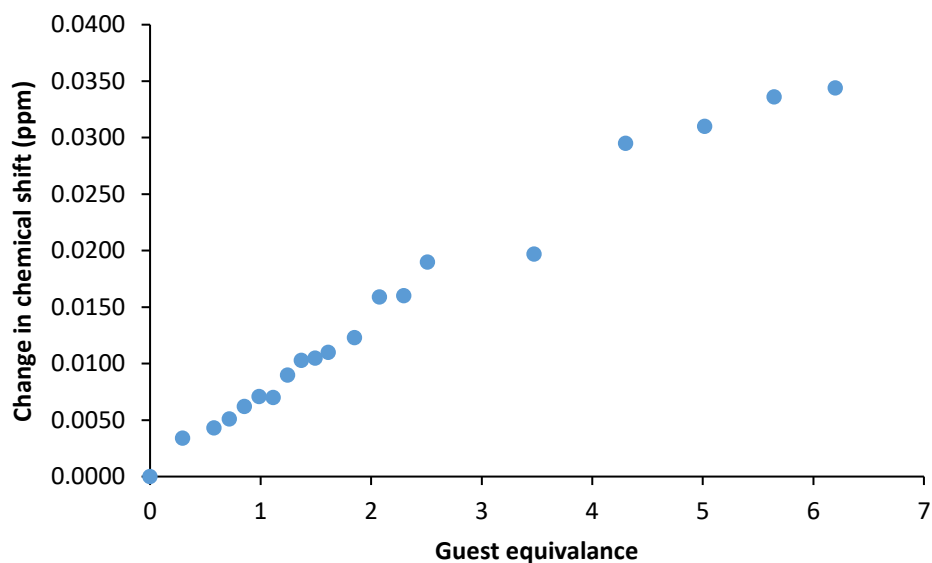

Figure S53: Change in chemical shift for the NH resonance of **1** (host) upon the addition of **25** (guest) in CD<sub>3</sub>CN at 298 K.  $K_{ass} = 7.00 \text{ M}^{-1} \pm 4.56 \%$ .

Bindfit link: <http://app.supramolecular.org/bindfit/view/f31130c3-bf58-44f3-9b61-d32412f719d6>

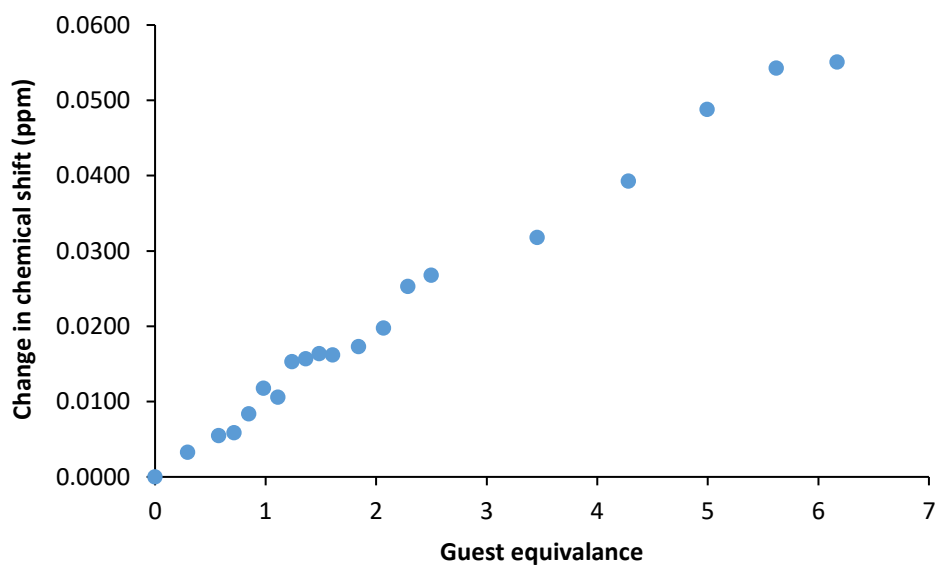

Figure S54: Change in chemical shift for the NH resonance of **1** (host) upon the addition of **26** (guest) in CD<sub>3</sub>CN at 298 K.  $K_{ass} = 3.42 \text{ M}^{-1} \pm 3.54 \%$ .

Bindfit link: <http://app.supramolecular.org/bindfit/view/91a3c6af-f387-4bea-a131-ce52c0330a2c>

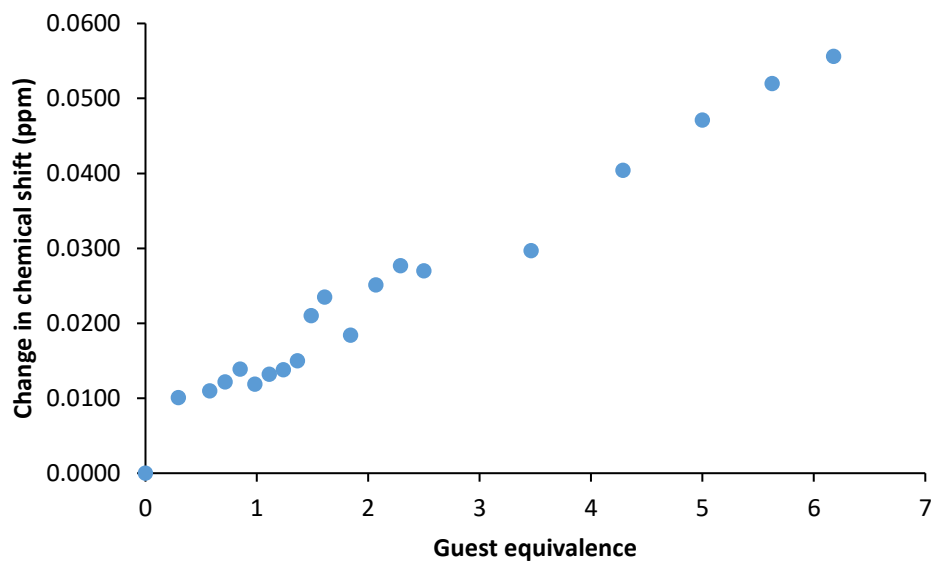

Figure S55: Change in chemical shift for the NH resonance for **2** (host) upon the addition of **5** (guest) in CD<sub>3</sub>CN at 298 K.  $K_{ass} = 3.10 \text{ M}^{-1} \pm 6.22 \%$ .

Bindfit link: <http://app.supramolecular.org/bindfit/view/f45551ee-0a63-47bf-8032-0672ef69cca9>

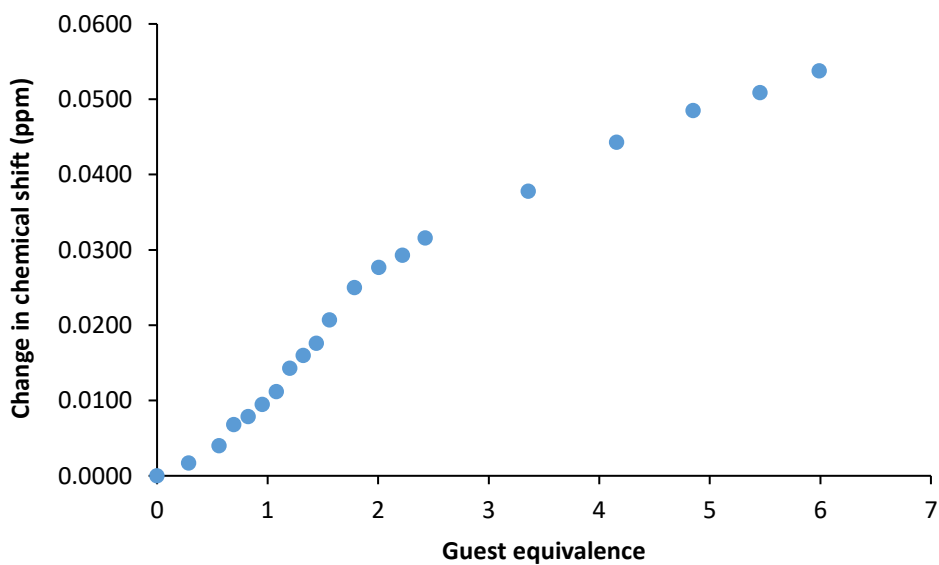

Figure S56: Change in chemical shift for the NH resonance for **2** (host) upon the addition of **6** (guest) in CD<sub>3</sub>CN at 298 K.  $K_{ass} = 20.03 \text{ M}^{-1} \pm 5.08 \%$ .

Bindfit link: <http://app.supramolecular.org/bindfit/view/42016e96-e306-4b94-b283-1656839596d6>

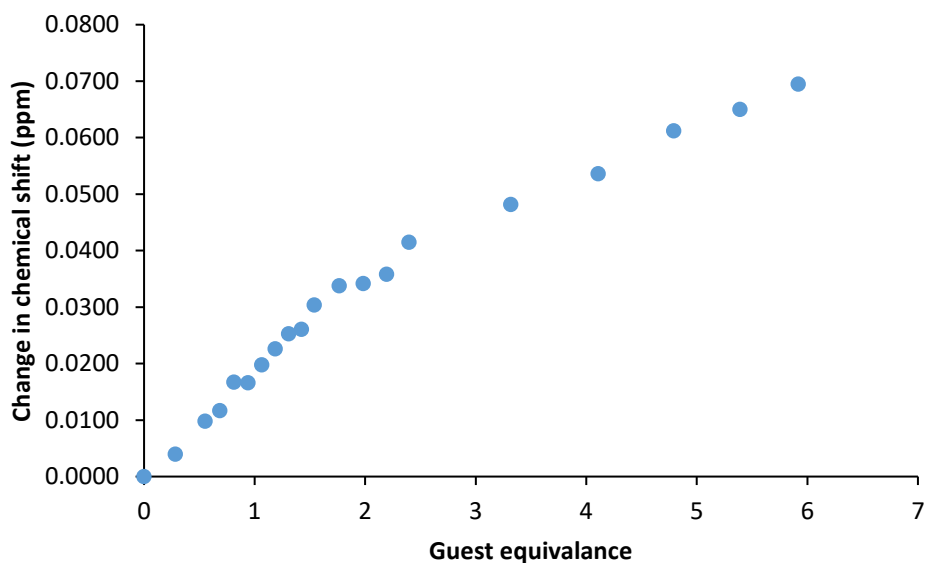

Figure S57: Change in chemical shift for the NH resonance for **2** (host) upon the addition of **8** (guest) in CD<sub>3</sub>CN at 298 K.  $K_{ass} = 23.46 \text{ M}^{-1} \pm 3.58 \%$ .

Bindfit link: <http://app.supramolecular.org/bindfit/view/53fdddce-f2b3-450d-be29-b28429b45d41>

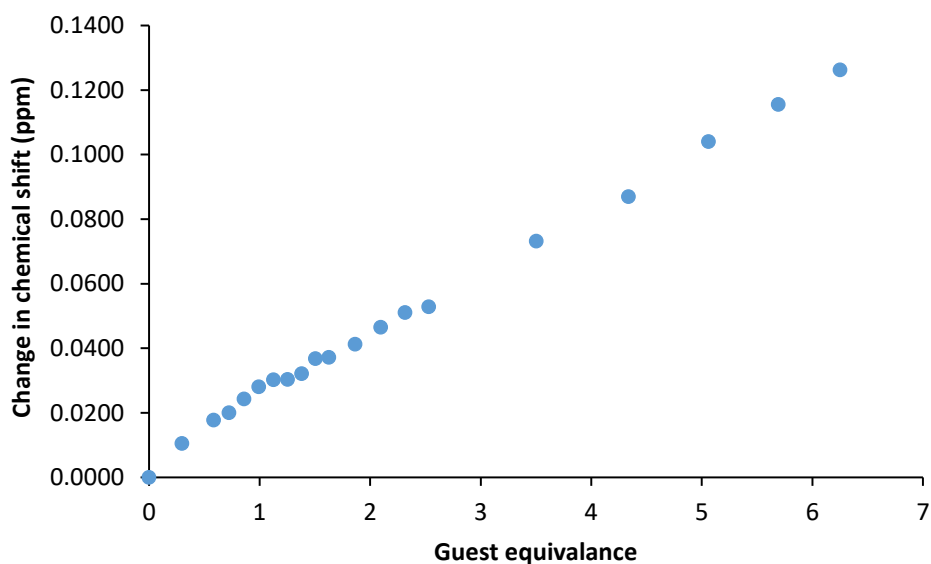

Figure S58: Change in chemical shift for the NH resonance for **2** (host) upon the addition of **10** (guest) in CD<sub>3</sub>CN at 298 K.  $K_{ass} = 32.01 \text{ M}^{-1} \pm 7.48 \%$ .

Bindfit link: <http://app.supramolecular.org/bindfit/view/6e90f221-199d-4eff-aa7c-7b860a44307a>

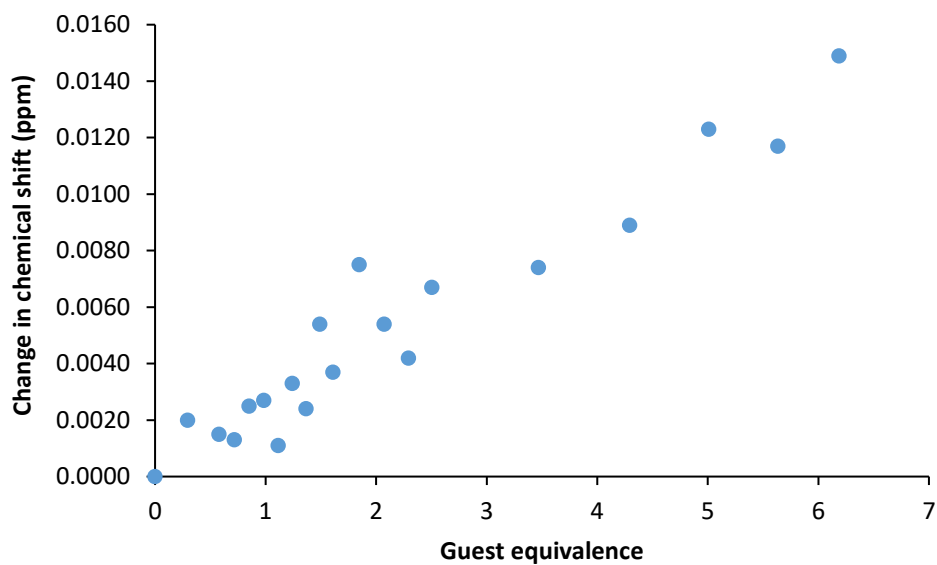

Figure S59: Change in chemical shift for the NH resonance for **2** (host) upon the addition of **16** (guest) in CD<sub>3</sub>CN at 298 K. This data could not be fitted to a 1:1, 2:1 or 1:2 binding isotherm.

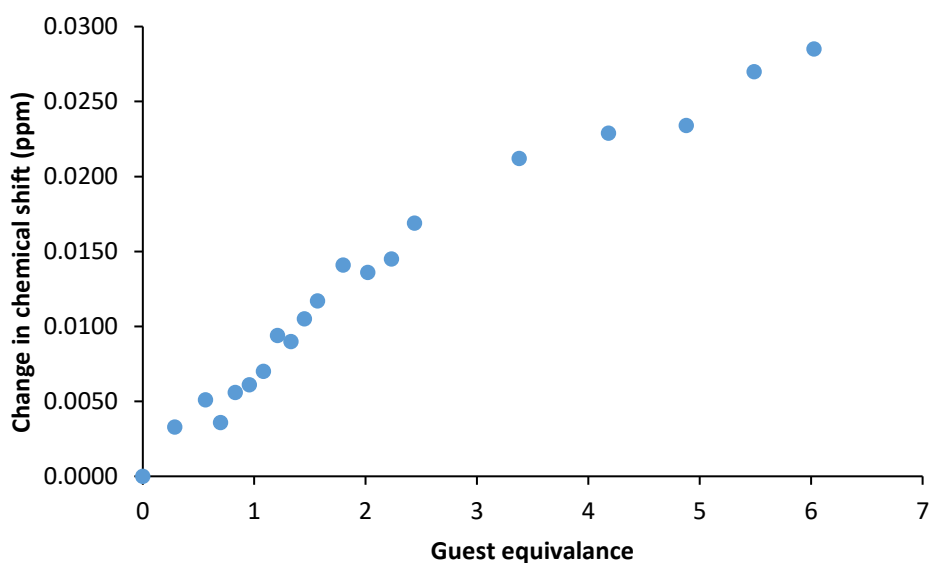

Figure S60: Change in chemical shift for the NH resonance for **2** (host) upon the addition of **18** (guest) in CD<sub>3</sub>CN at 298 K.  $K_{ass} = 19.35 \text{ M}^{-1} \pm 5.62 \%$ .

Bindfit link: <http://app.supramolecular.org/bindfit/view/71b379ff-c9b0-43c6-9bd6-fddca0148f09>

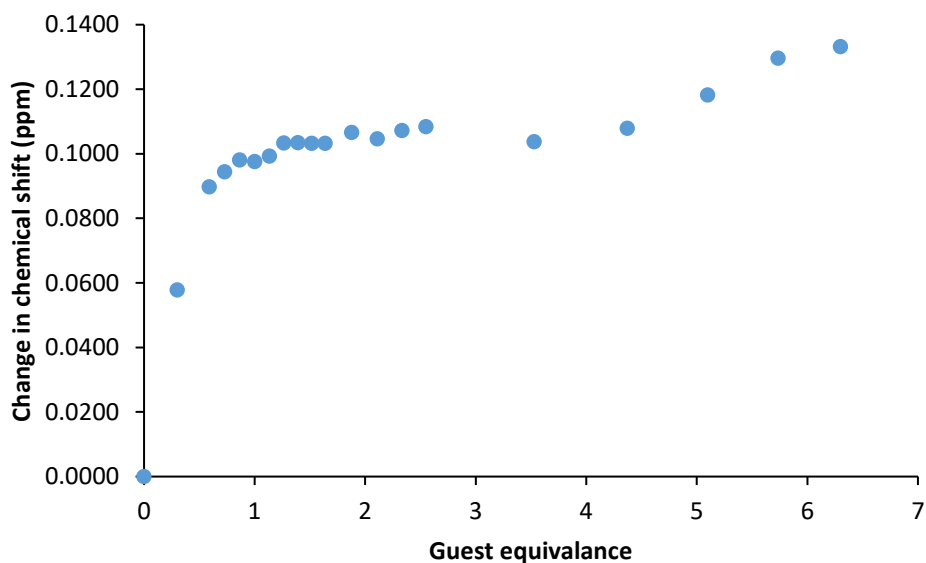

Figure S61: Change in chemical shift for the NH resonance for **2** (host) upon the addition of **20** (guest) in CD<sub>3</sub>CN at 298 K. This data could not be fitted to a 1:1, 2:1 or 1:2 binding isotherm.

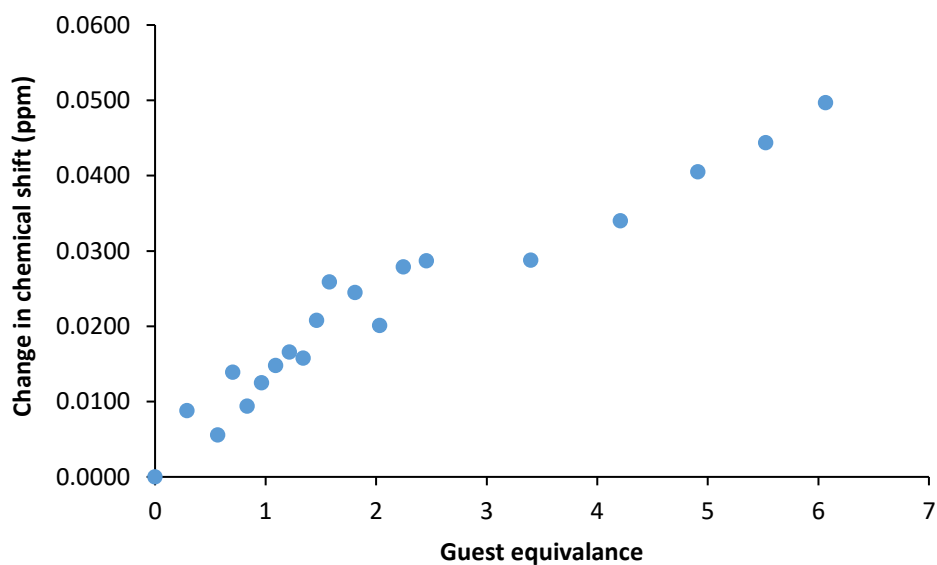

Figure S62: Change in chemical shift for the NH resonance for **3** (host) upon the addition of **5** (guest) in CD<sub>3</sub>CN at 298 K.  $K_{ass} = 19.32 \text{ M}^{-1} \pm 11.33 \%$ .

Bindfit link: <http://app.supramolecular.org/bindfit/view/1de2d3e9-4f52-4511-950d-da5b76976e7b>

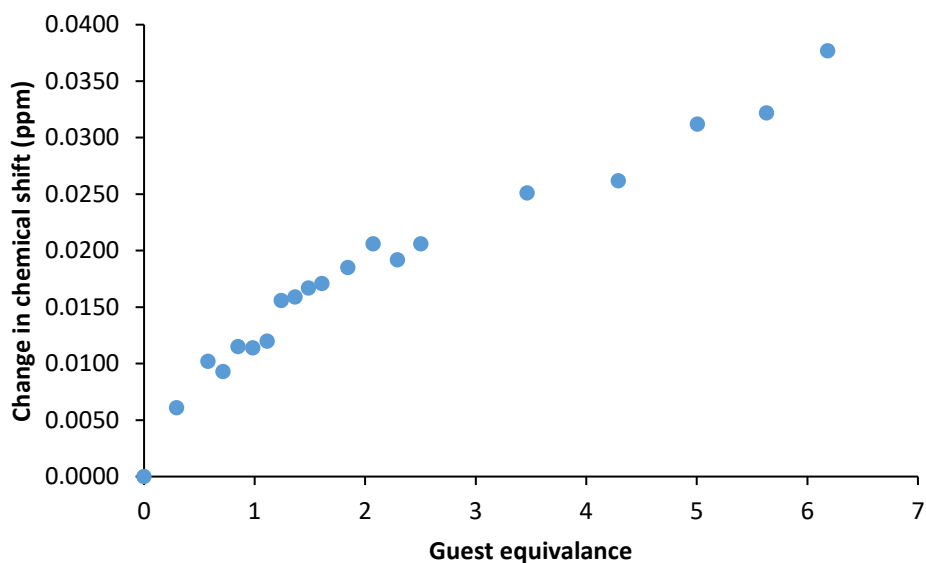

Figure S63: Change in chemical shift for the NH resonance for **3** (host) upon the addition of **6** (guest) in CD<sub>3</sub>CN at 298 K.  $K_{ass} = 27.28 \text{ M}^{-1} \pm 8.69 \%$ .

Bindfit link: <http://app.supramolecular.org/bindfit/view/1f70a889-a047-406c-b11f-0d866a5898f8>

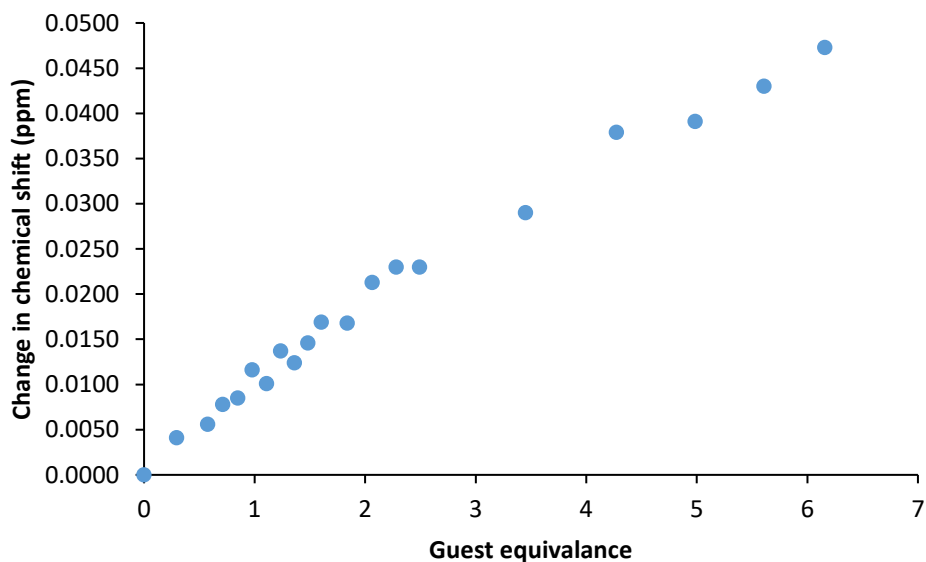

Figure S64: Change in chemical shift for the NH resonance for **3** (host) upon the addition of **8** (guest) in CD<sub>3</sub>CN at 298 K.  $K_{ass} = 8.76 \text{ M}^{-1} \pm 3.37 \%$ .

Bindfit link: <http://app.supramolecular.org/bindfit/view/e17ebb8e-4bfd-4e99-b1e6-f2f640c1da32>



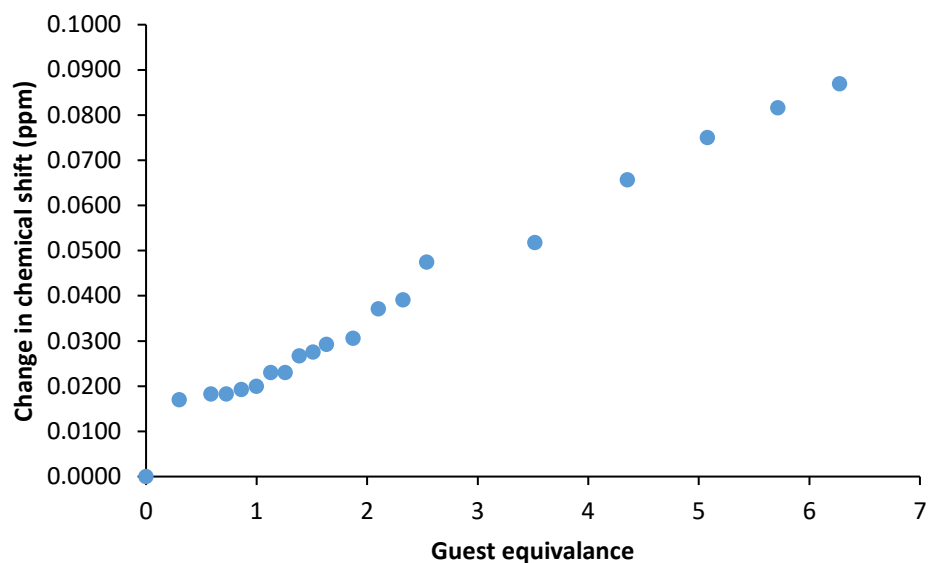

Figure S65: Change in chemical shift for the NH resonance for **3** (host) upon the addition of **10** (guest) in CD<sub>3</sub>CN at 298 K.  $K_{ass} = 3.16 \text{ M}^{-1} \pm 4.25 \%$ .

Bindfit link: <http://app.supramolecular.org/bindfit/view/1d99c38f-3cf1-43af-a322-8f4a8415f495>

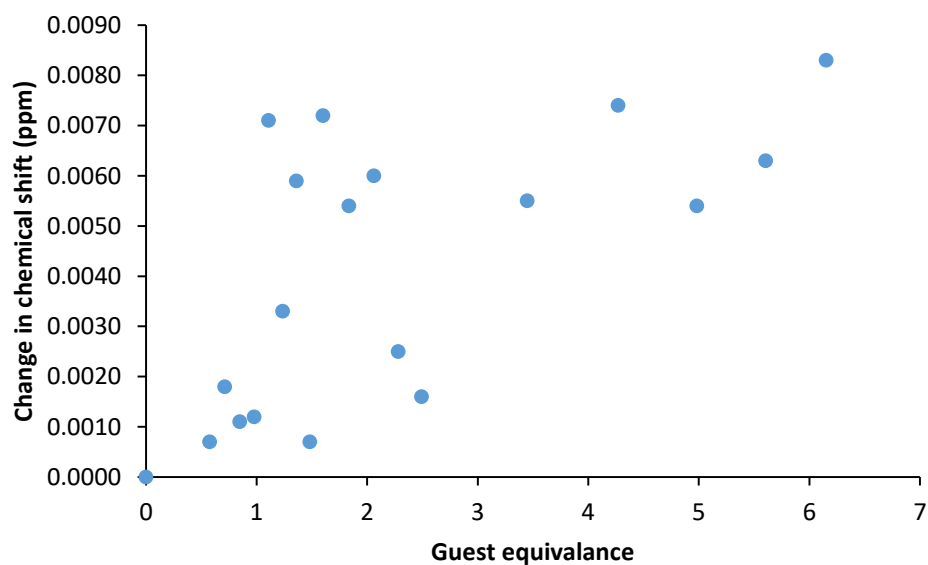

Figure S66: Change in chemical shift for the NH resonance for **3** (host) upon the addition of **16** (guest) in CD<sub>3</sub>CN at 298 K. This data could not be fitted to a 1:1, 2:1 or 1:2 binding isotherm.

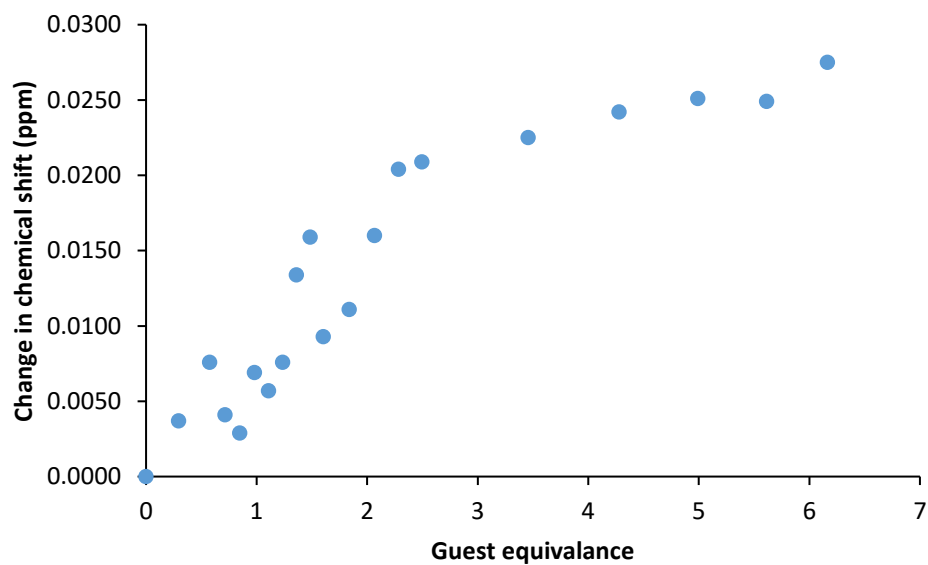

Figure S67: Change in chemical shift for the NH resonance for **3** (host) upon the addition of **18** (guest) in CD<sub>3</sub>CN at 298 K. This data could not be fitted to a 1:1, 2:1 or 1:2 binding isotherm.

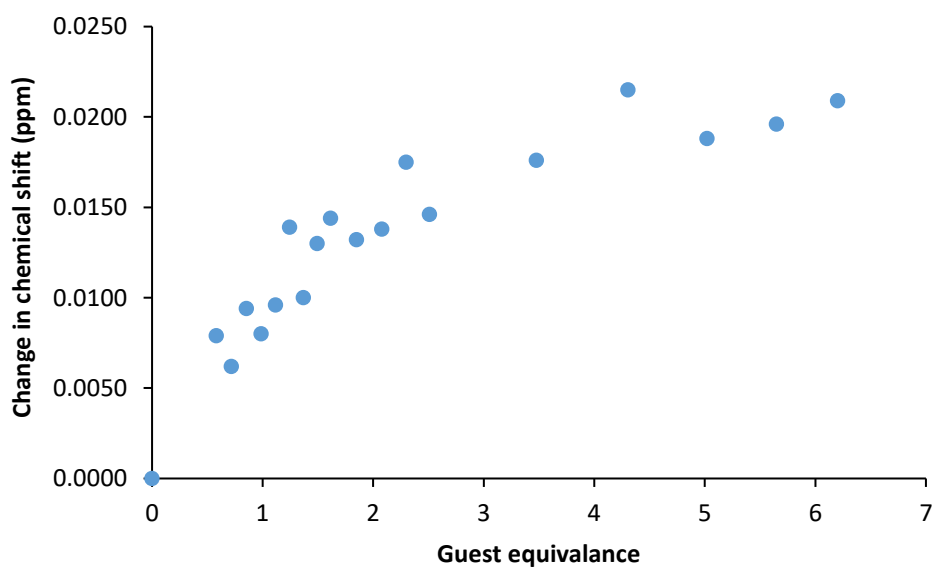

Figure S68: Change in chemical shift for the NH resonance for **3** (host) upon the addition of **20** (guest) in CD<sub>3</sub>CN at 298 K. This data could not be fitted to a 1:1, 2:1 or 1:2 binding isotherm.

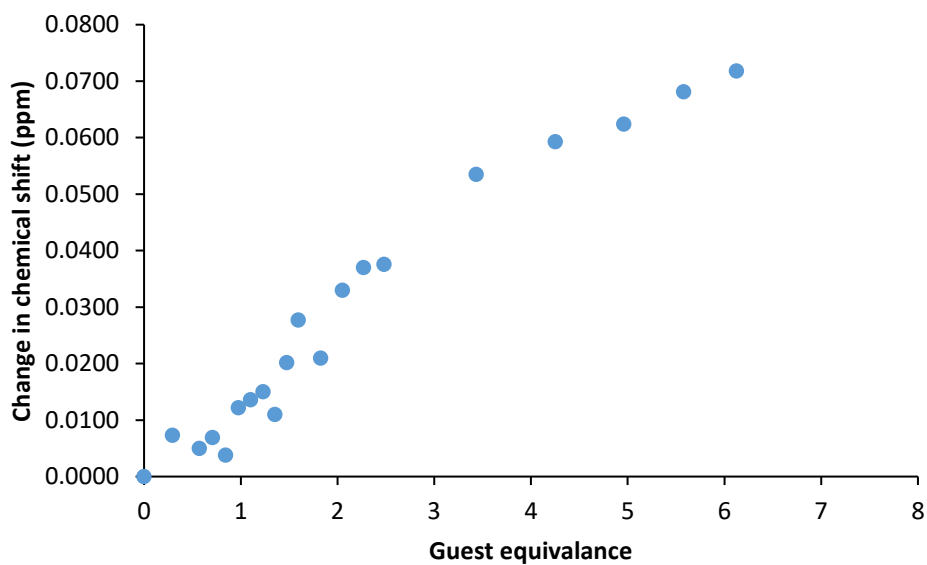

Figure S69: Change in chemical shift for the NH resonance for **4** (host) upon the addition of **5** (guest) in CD<sub>3</sub>CN at 298 K.  $K_{\text{ass}} = 9.80 \text{ M}^{-1} \pm 7.71 \%$ .

Bindfit link: <http://app.supramolecular.org/bindfit/view/5841178c-5c2c-463a-83a4-2f9bd97dad7c>

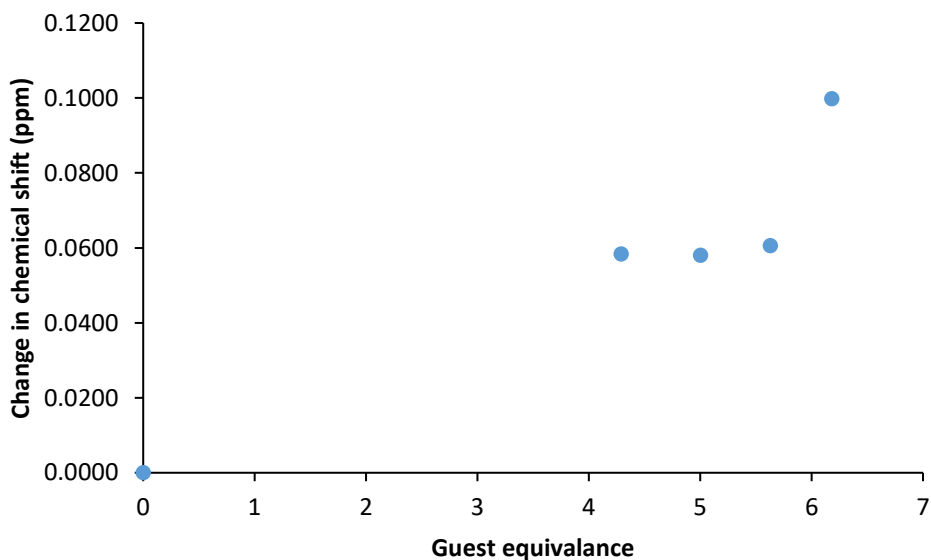

Figure S70: Change in chemical shift for the NH resonance for **4** (host) upon the addition of **6** (guest) in CD<sub>3</sub>CN at 298 K. Due to peak overlap, the chemical shift for the NH resonance could not be followed accurately.

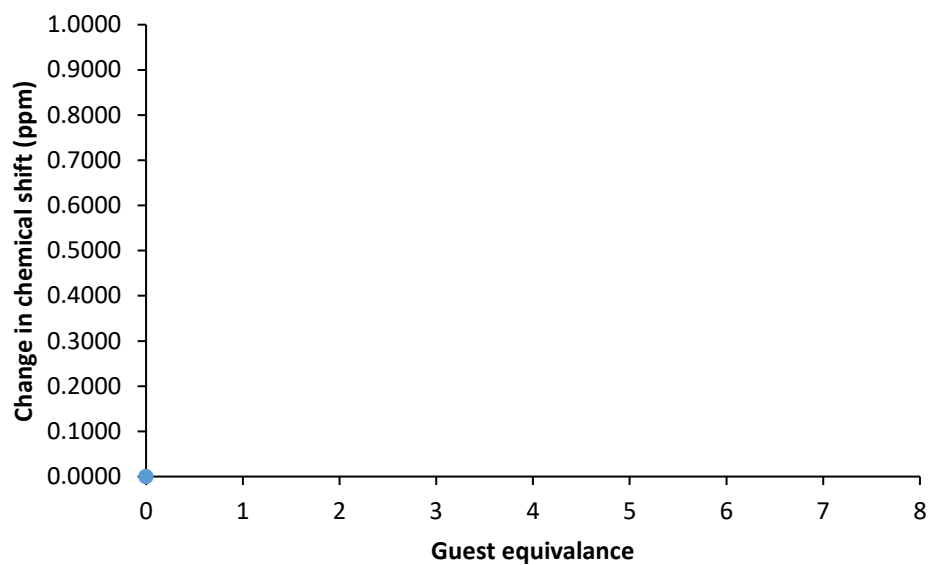

Figure S71: Change in chemical shift for the NH resonance for **4** (host) upon the addition of **8** (guest) in  $\text{CD}_3\text{CN}$  at 298 K. Due to peak overlap, the chemical shift for the NH resonance could not be followed accurately.

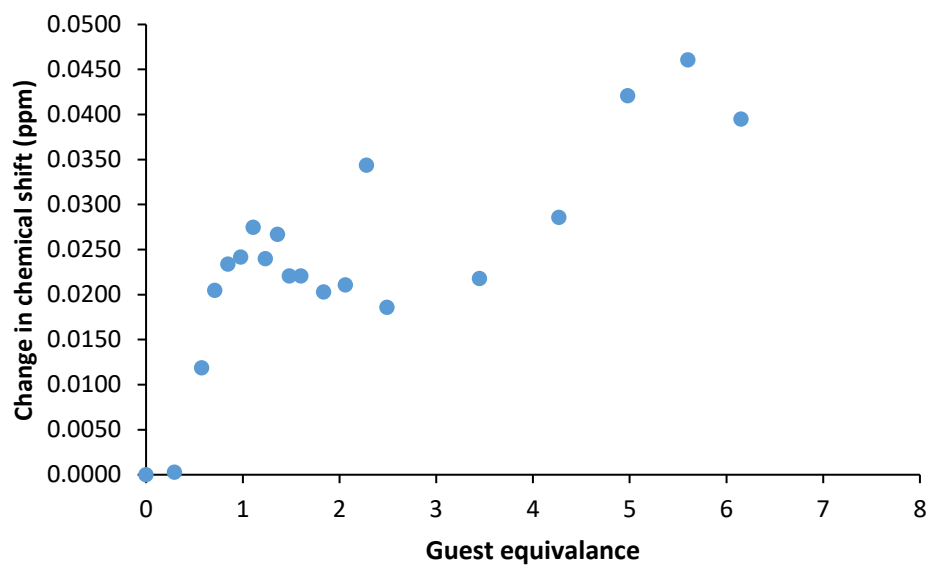

Figure S72: Change in chemical shift for the NH resonance for **4** (host) upon the addition of **10** (guest) in  $\text{CD}_3\text{CN}$  at 298 K. This data could not be fitted to a 1:1, 2:1 or 1:2 binding isotherm.

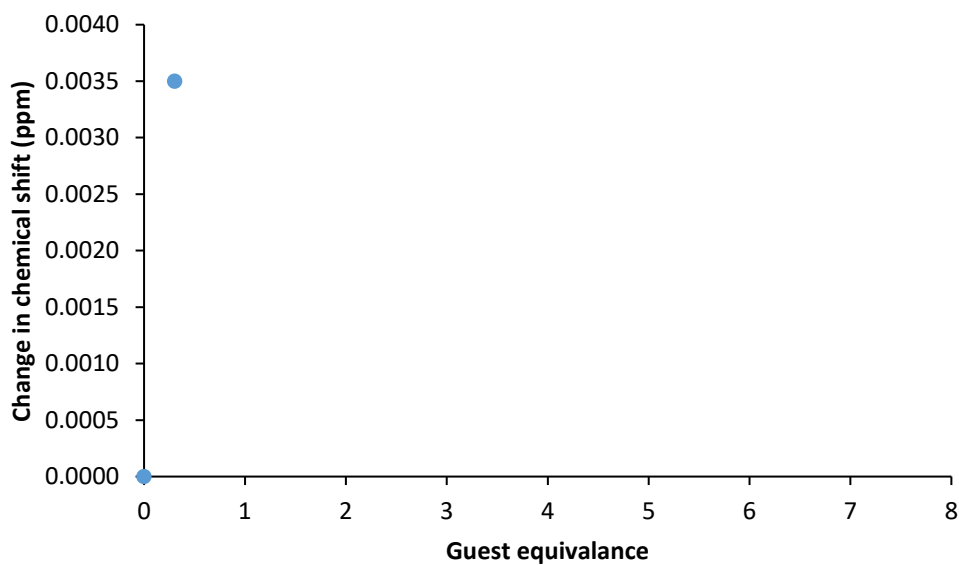

Figure S73: Change in chemical shift for the NH resonance for **4** (host) upon the addition of **16** (guest) in CD<sub>3</sub>CN at 298 K. Due to peak overlap, the chemical shift for the NH resonance could not be followed accurately.

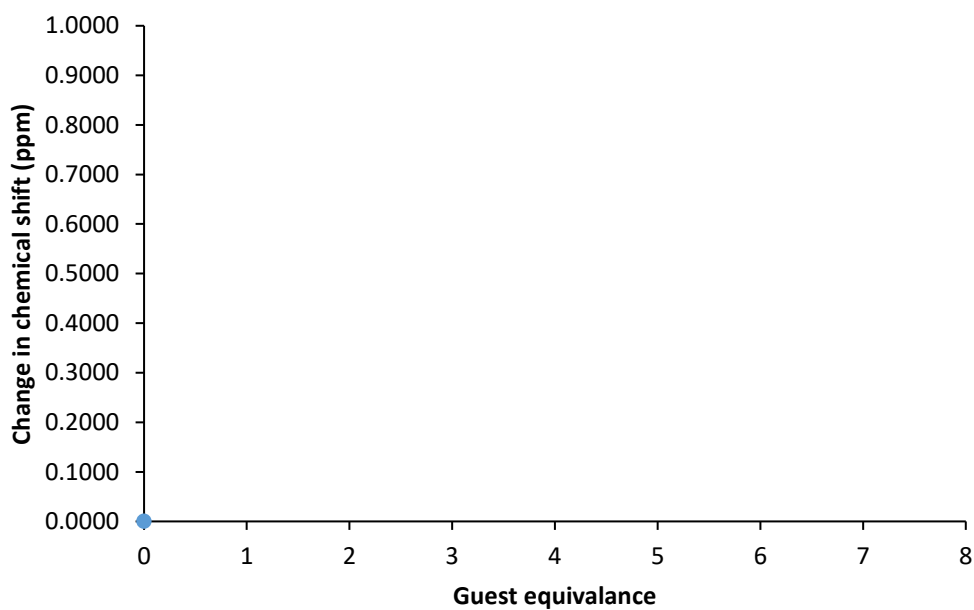

Figure S74: Change in chemical shift for the NH resonance for **4** (host) upon the addition of **18** (guest) in CD<sub>3</sub>CN at 298 K. Due to peak overlap, the chemical shift for the NH resonance could not be followed accurately.

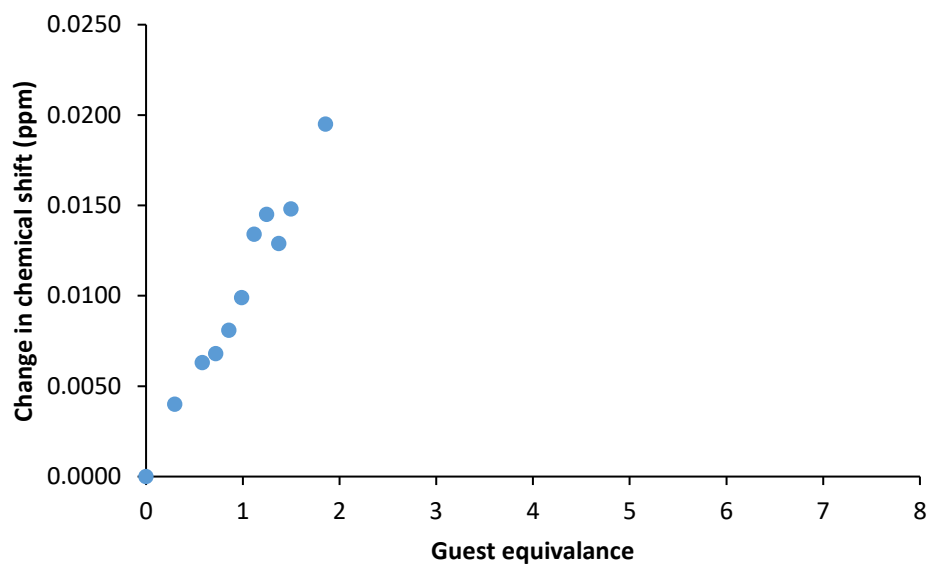

Figure S75: Change in chemical shift for the NH resonance for **4** (host) upon the addition of **20** (guest) in  $\text{CD}_3\text{CN}$  at 298 K. Due to peak overlap, the chemical shift for the NH resonance could not be followed accurately.

## Job Plot analysis

Two solutions were produced; the first solution was a 3 mL, 0.01 M solution of the receptor and the second was a 3 mL, 0.01 M solution of the simulant. Of the receptor solution 0.5 mL was added to a NMR tube. The amount of receptor solution was then decreased by 0.05 mL and the amount of simulant solution increased by 0.05 mL for each successive NMR tubes until a 9:1 simulant:receptor ratio was reached. A  $^1\text{H}$  NMR spectra was taken for each of the ten NMR tubes and calibrated to the solvent peak. The data was then used to produce a job plot, in accordance with the methods described by Job. Plotting the molar fraction of the receptor against the values given in the formula:

$$\frac{\delta_{obs} - \delta_{int}}{\delta_{fin} - \delta_{int}} \times \chi_r$$

Where  $\delta_{obs}$  is the observed chemical shift,  $\delta_{int}$  is the initial chemical shift,  $\delta_{fin}$  is the final chemical shift and  $\chi_r$  is the molar fraction of the receptor

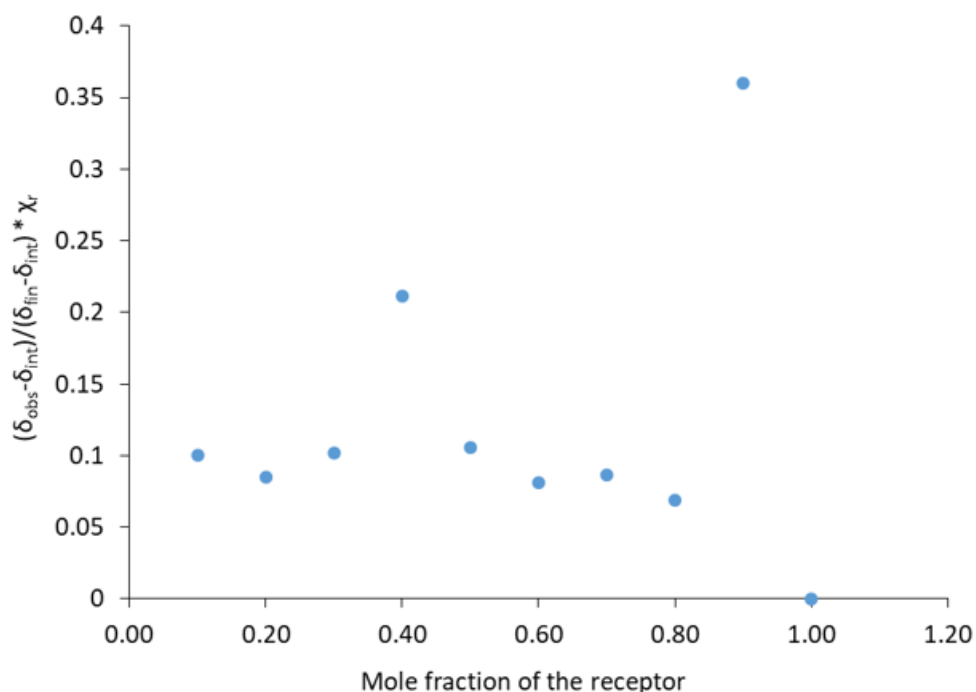

Figure S76: Job plot analysis for receptor **1** and compound **16**.

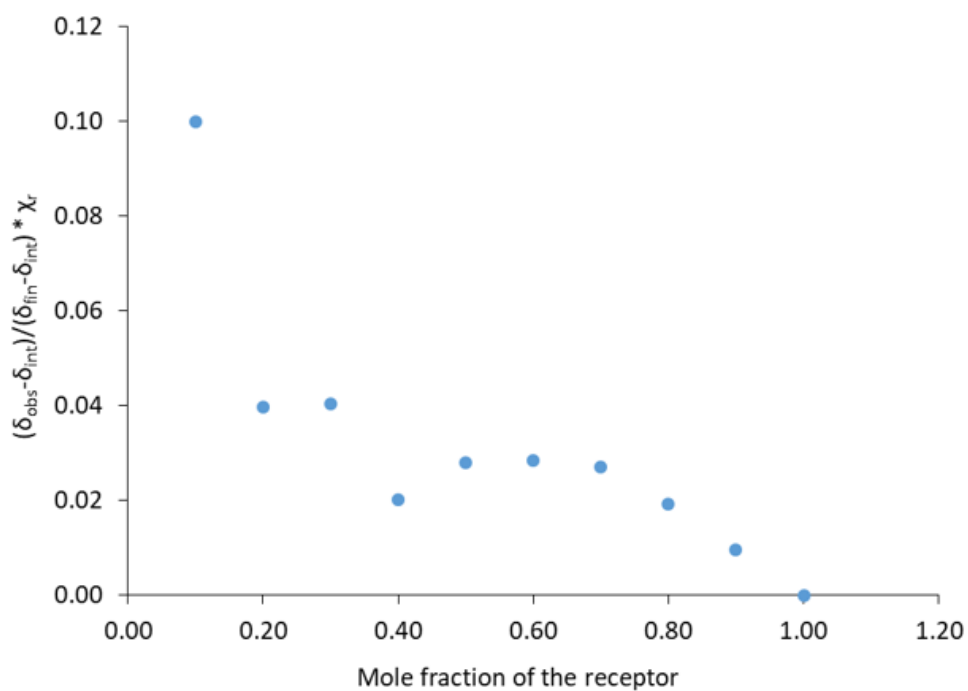

Figure S77: Job plot analysis for receptor **1** and compound **20**.

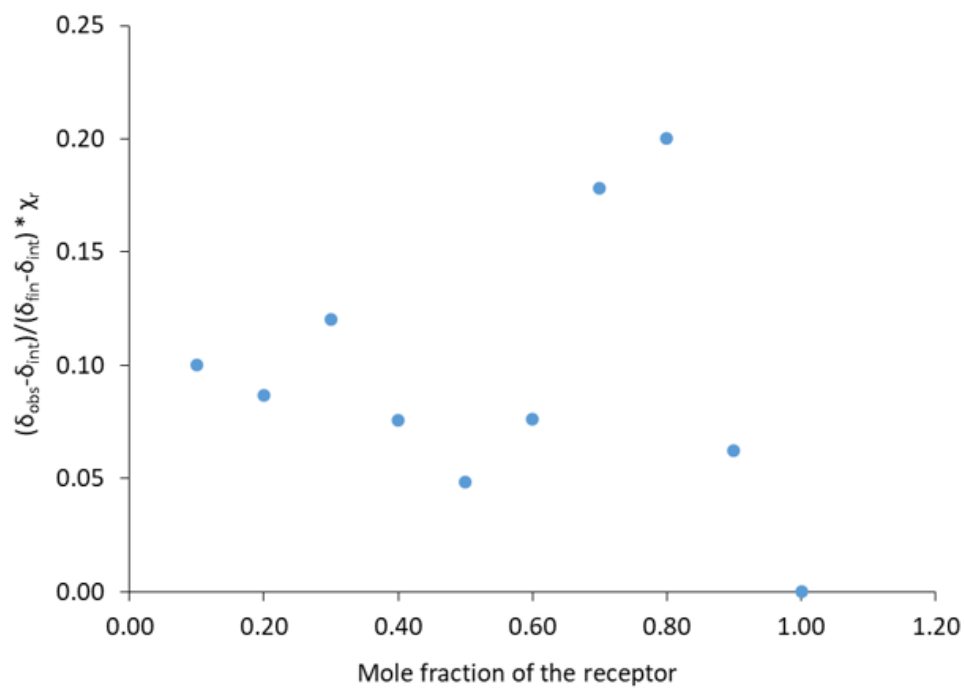

Figure S78: Job plot analysis for receptor **1** and compound **22**.



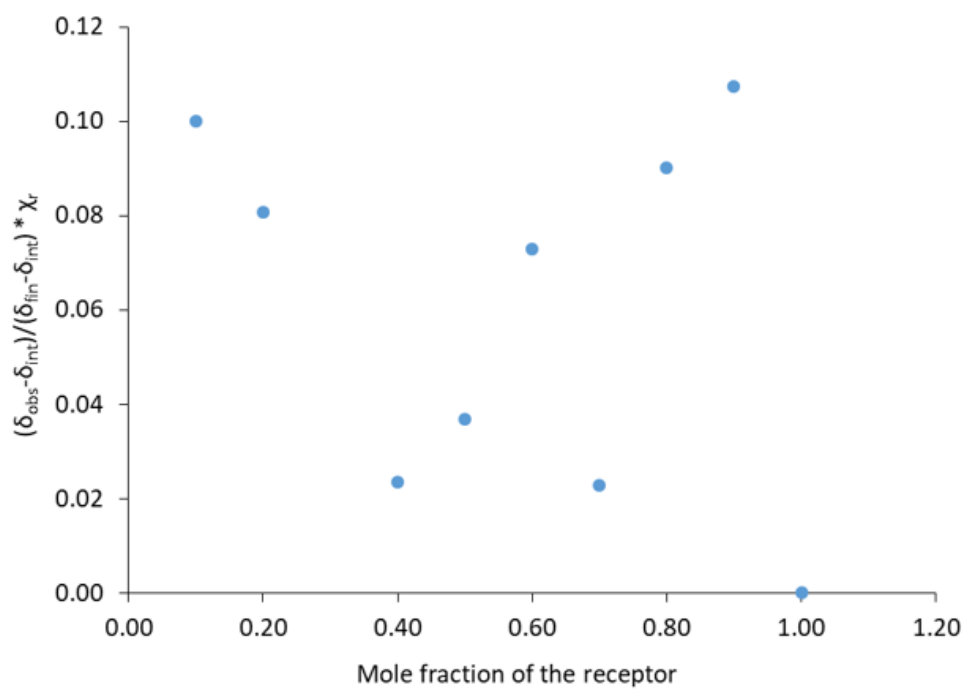

Figure S79: Job plot analysis for receptor **1** and compound **23**.

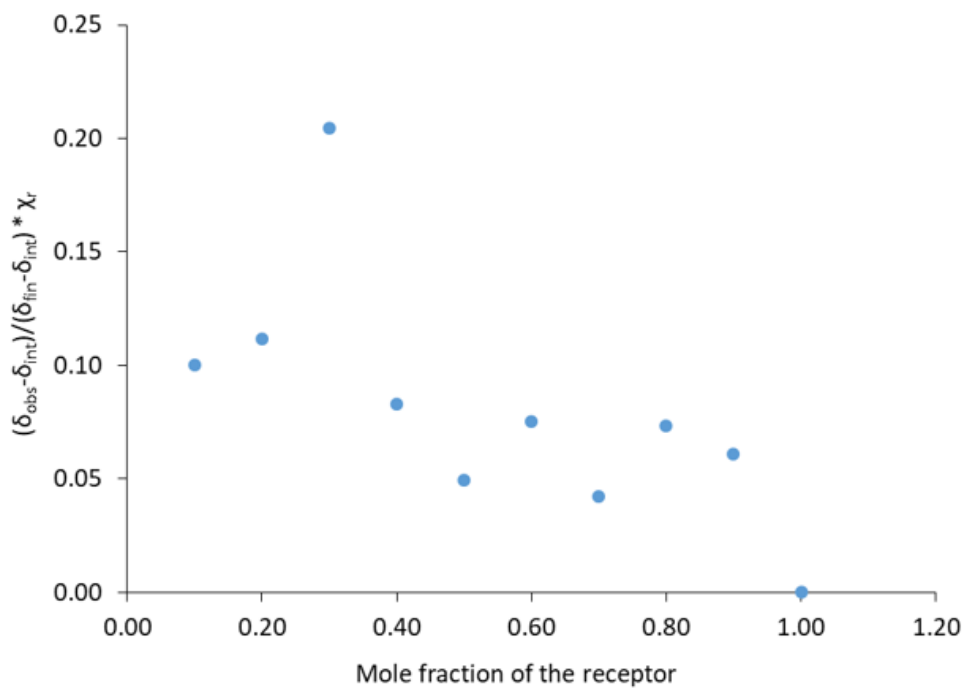

Figure S80: Job plot analysis for receptor **1** and compound **24**.

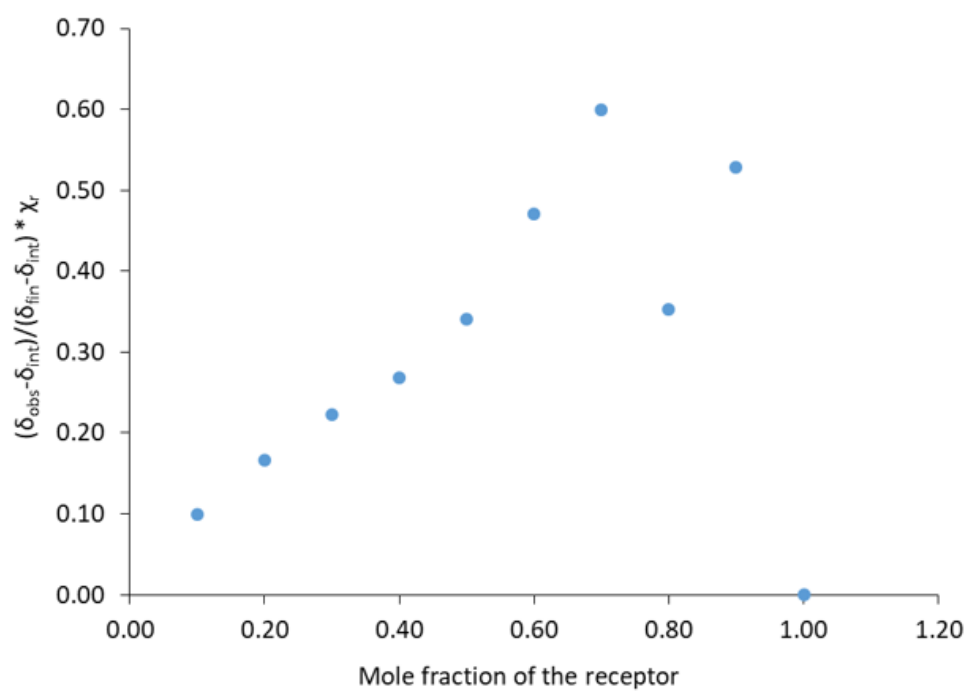

Figure S81: Job plot analysis for receptor **2** and compound **6**.

## Single crystal X-ray structure information

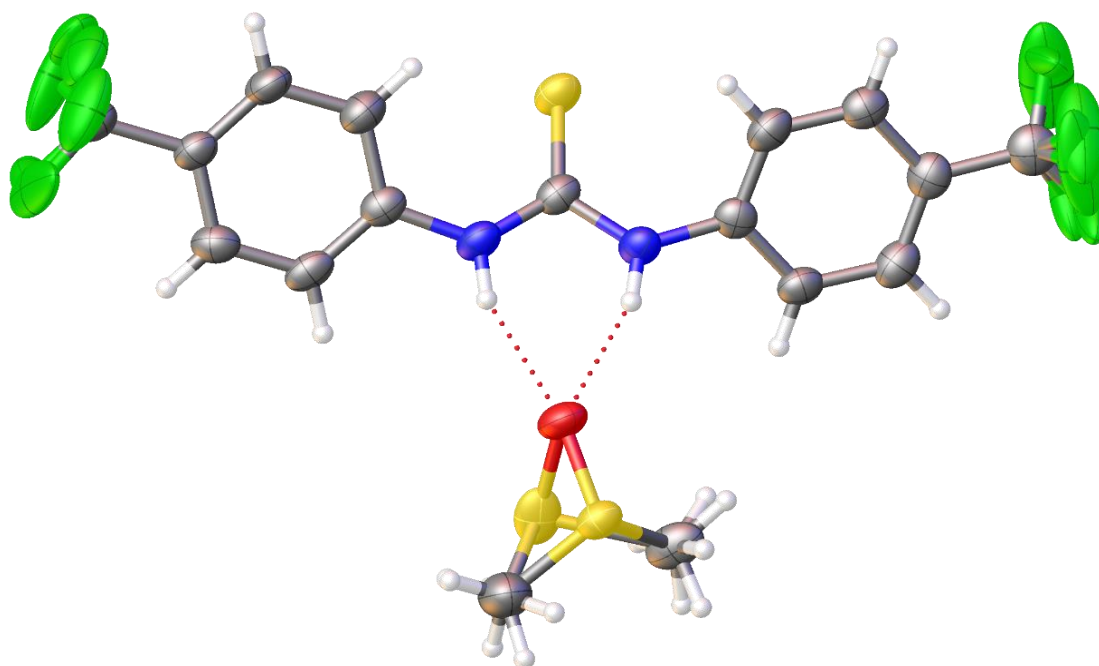

Figure S82: Crystal data for compound **1**: red = oxygen; yellow = sulfur; blue = nitrogen; white = hydrogen; grey = carbon; green = fluorine. CCDC 1855728, C<sub>17</sub>H<sub>16</sub>F<sub>6</sub>N<sub>2</sub>OS<sub>2</sub> (M = 442.44): monoclinic, space group P 21/c, a = 9.5039(12) Å, b = 8.281(2) Å, c = 24.124(8) Å,  $\alpha = 90^\circ$ ,  $\beta = 96.83(2)^\circ$ ,  $\gamma = 90^\circ$ , V = 1885.1(8) Å<sup>3</sup>, Z = 4, T = 100(1) K, CuK $\alpha$  = 1.5418 Å, D<sub>calc</sub> = 1.559 g/cm<sup>3</sup>, 11491 reflections measured (7.382 ≤ 2 $\theta$  ≤ 133.200), 3331 unique (R<sub>int</sub> = 0.1420, R<sub>sigma</sub> = 0.1376) which were used in all calculations. The final R<sub>1</sub> was 0.0709 (I > 2 $\sigma$ (I)) and wR<sub>2</sub> was 0.1800 (all data).

### Hydrogen bonding table from single crystal X-ray structure

Table S1: Hydrogen bond distances and angles observed for hydrogen bonded complex formation, calculated from single crystal X-ray structure, Figure S95.

| Compound | Hydrogen bond donor | Hydrogen atom | Hydrogen bond acceptor | Hydrogen bond length (D...A) (Å) | Hydrogen bond angle (D-H...A) (°) |
|----------|---------------------|---------------|------------------------|----------------------------------|-----------------------------------|
| <b>1</b> | N1                  | H1            | O1                     | 2.875 (6)                        | 156.8 (3)                         |
| <b>1</b> | N2                  | H2            | O1                     | 2.808 (6)                        | 164.6 (2)                         |

## Biological testing

### *Schizosaccharomyces pombe* toxicity screening experimental

**Preparation of amino acid solution:** Adenine (5.63 g, 41.66 mmol), leucine (5.63 g, 41.00 mmol), histidine (5.63 g, 36.26 mmol) and uracil (5.63 g, 46.07 mmol) were dissolved into distilled H<sub>2</sub>O (500 mL), autoclaved then allowed to cool to room temperature.

**Preparation of agar plates and initial cell growth:** Yeast extract (10 g) and glucose (60.0 g, 333.03 mmol) were dissolved in distilled H<sub>2</sub>O (2000 mL). This stock solution was then divided equally into five bottles. Agar (6 g) was then dissolved into each 400 mL YES media stock solution. The bottles were autoclaved then allowed to cool to room temperature and to each stock solution was added the pre-prepared amino acid solution (8 mL). This solution was then immediately poured into sterile Petri dishes under sterile conditions. The plates were then left to set and stored at 4 °C. Prototroph *Schizosaccharomyces pombe* cells were then streaked onto the agar plates under sterile conditions, sealed using Parafilm then grown at 25 °C for two days.

**EMMG (Edinburg minimal media with glutamic acid) media preparation:** EMM powder without nitrogen (27.30 g) and L-glutamic acid monosodium salt hydrate (3.38 g, 19.99 mmol) were dissolved in distilled H<sub>2</sub>O (1000 mL). The EMMG media was then poured into bottles, autoclaved and allowed to cool to room temperature before use.

**Preparation of 96 well plates for *S. pombe* toxicity screening:** EMMG media (20 mL) was inoculated in a sterile Falcon using single colonies from the YES plate and incubated overnight at 25 °C with shaking. The cell density was calculated using a haemocytometer on the following day and the number of generation times were calculated using equation 1. The cell suspension was then diluted using equation 2 to reach a cell density of 2x10<sup>6</sup> cells/mL when grown for a further 20 hours. After 20 hours a final dilution with EMMG media was carried out to produce a cell suspension with a density of 0.5x10<sup>6</sup> cells/mL when grown for a further 20 hours. Once the suspension had reached a cell density of 0.5x10<sup>6</sup> cells/mL, an aliquot of the suspension (120 µL) was added to each well of the 96 well plate.

$$\text{Number of generation times} = \frac{\text{Incubation Time}}{\text{Generation time}}$$

Equation 1: Equation to calculate the number of generation times, calculated by dividing the time the culture is growing in EMMG media by the number generation time. Our cell suspensions were grown over 20 hours (incubation time) and the generation time was 4.

$$\text{Volume of Suspension needed for dilution} = 1000 \times \left[ \left( \frac{\text{Desired volume (mL)} \times \text{Desired Cell Density (cells/mL)}}{2^{\text{Number of Generation times}}} \right) \div \text{Current Density} \right]$$

Equation 2: The dilution equation to calculate the volume of suspension needed to inoculate a specific volume to a specific concentration after a specific period of time. The desired volume used was 20 mL, the desired cell density as stated in text and the number of generation times was calculated using Equation 1.

A 10mM stock solution of each compound (5-26) to be tested was prepared in a sterile 1:19 Ethanol: Distilled water mixture no longer than 2 hours before the start of the toxicity screening

experiment. An aliquot (60  $\mu$ L) of an appropriate compound stock solution was then added to a single well on the pre-prepared 96 well plate. Each experiment was repeated three times. A baseline for cell growth in the absence of compounds **5-26** was obtained through the addition of an aliquot of a sterile 1:19 Ethanol: Distilled water mixture (60  $\mu$ L) to twelve wells of the 96 well plate, to ensure stable growth. The 96 well plates were then sealed using Parafilm and incubated in a plate reader at 25°C with shaking. An absorbance reading at 600 nm was taken every 15 minutes for 45 hours.

## *S. Pombe* screening Results

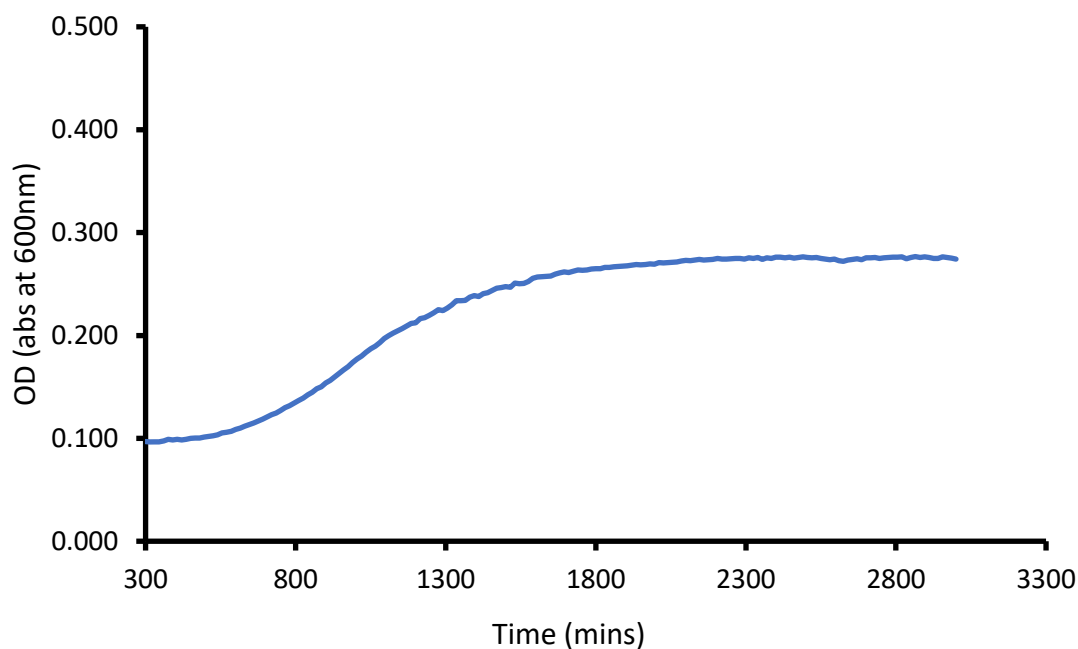

Figure S83: *S. pombe* growth curve. Data shown represents an average of six experiments. Graph shows the addition of a 1:19 EtOH:H<sub>2</sub>O **control** solution (60  $\mu$ L) to a suspension of cells (density =  $0.5 \times 10^6$  cells/mL) in EMMG media (120  $\mu$ L). Data displayed from 300 minutes due to initial plate reader calibration.

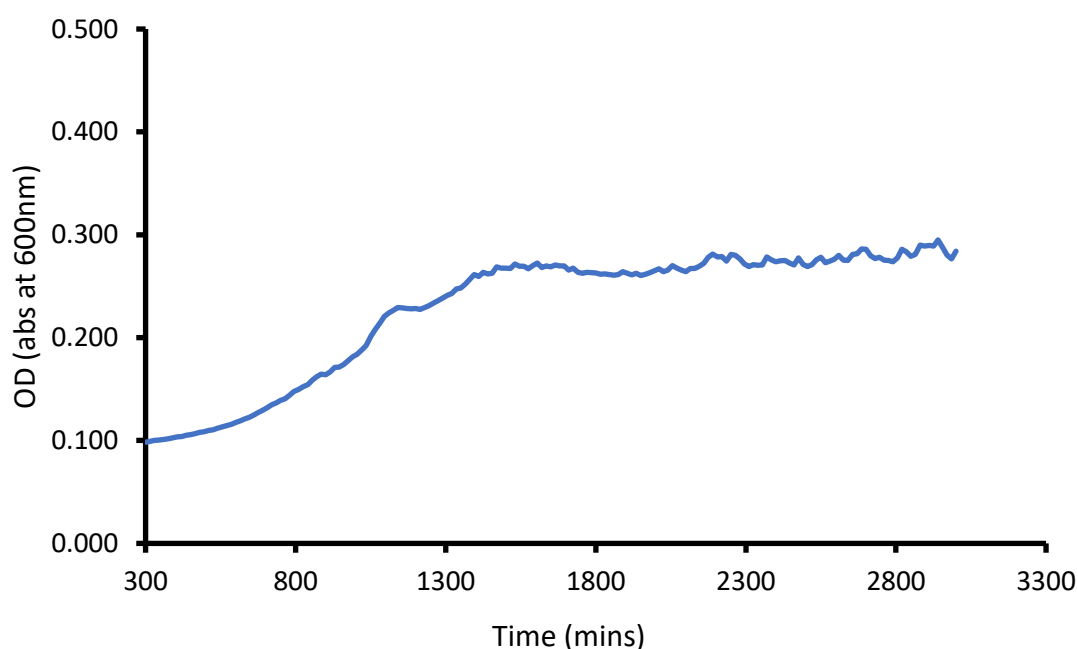

Figure S84: *S. pombe* growth curve. Data shown represents an average of three experiments. Graph shows the addition of 1:19 EtOH:H<sub>2</sub>O solution of **5** (10 mM, 60  $\mu$ L) to a suspension of cells (density =  $0.5 \times 10^6$  cells/mL) in EMMG media (120  $\mu$ L). Data displayed from 300 minutes due to initial plate reader calibration.

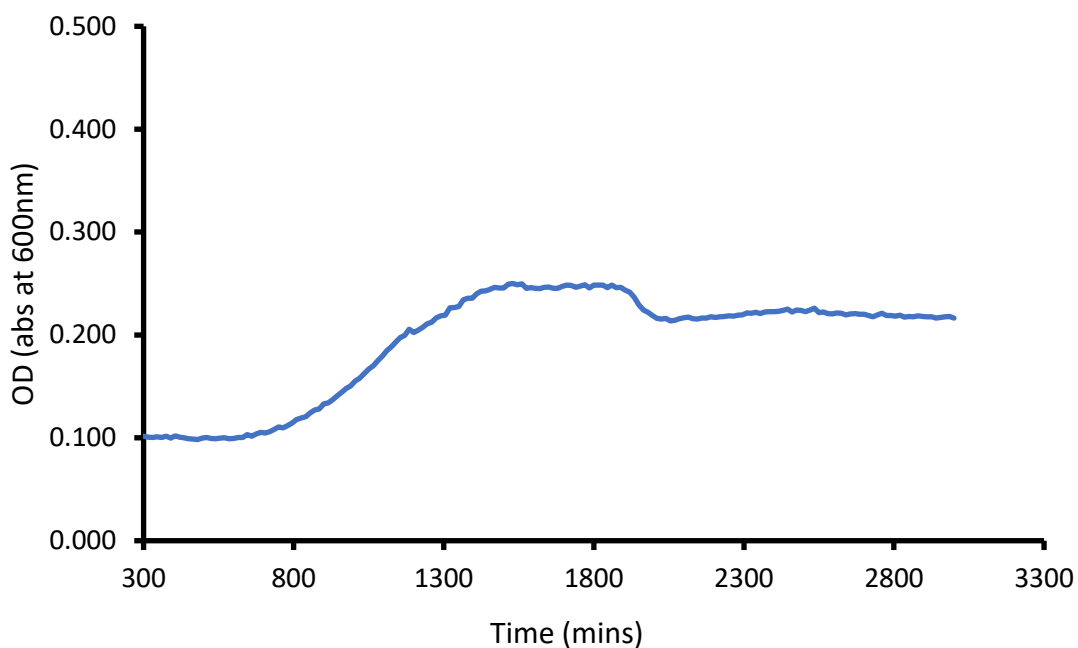

Figure S85: *S. pombe* growth curve. Data shown represents an average of three experiments. Graph shows the addition of 1:19 EtOH:H<sub>2</sub>O solution of **6** (10 mM, 60  $\mu$ L) to a suspension of cells (density =  $0.5 \times 10^6$  cells/mL) in EMMG media (120  $\mu$ L). Data displayed from 300 minutes due to initial plate reader calibration.

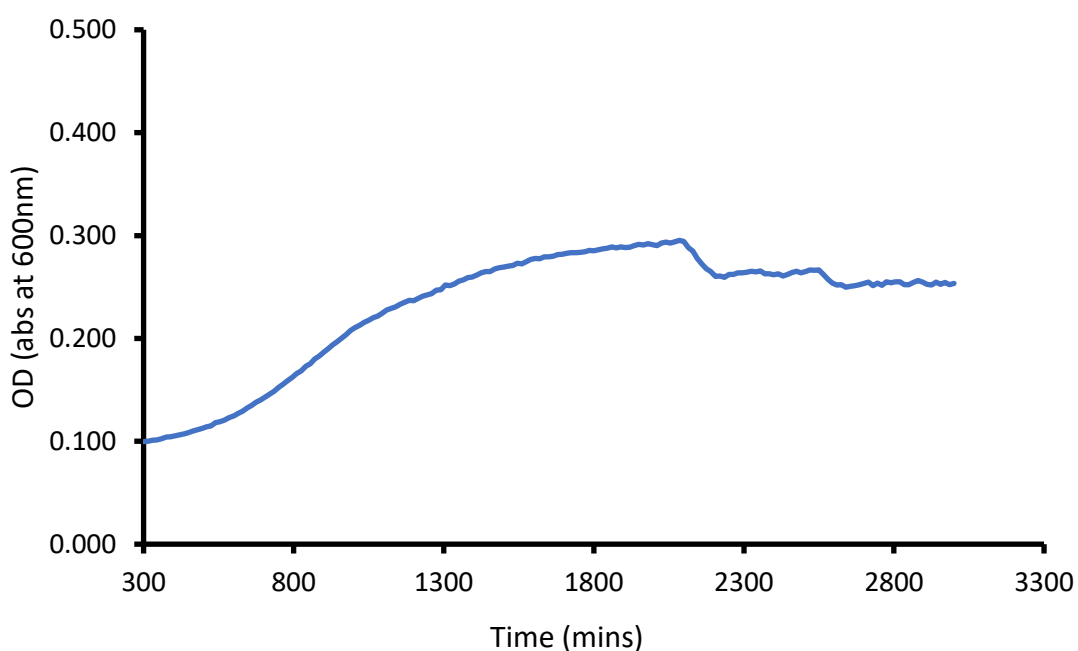

Figure S86: *S. pombe* growth curve. Data shown represents an average of three experiments. Graph shows the addition of 1:19 EtOH:H<sub>2</sub>O solution of **7** (10 mM, 60  $\mu$ L) to a suspension of cells (density =  $0.5 \times 10^6$  cells/mL) in EMMG media (120  $\mu$ L). Data displayed from 200 minutes due to initial plate reader calibration.

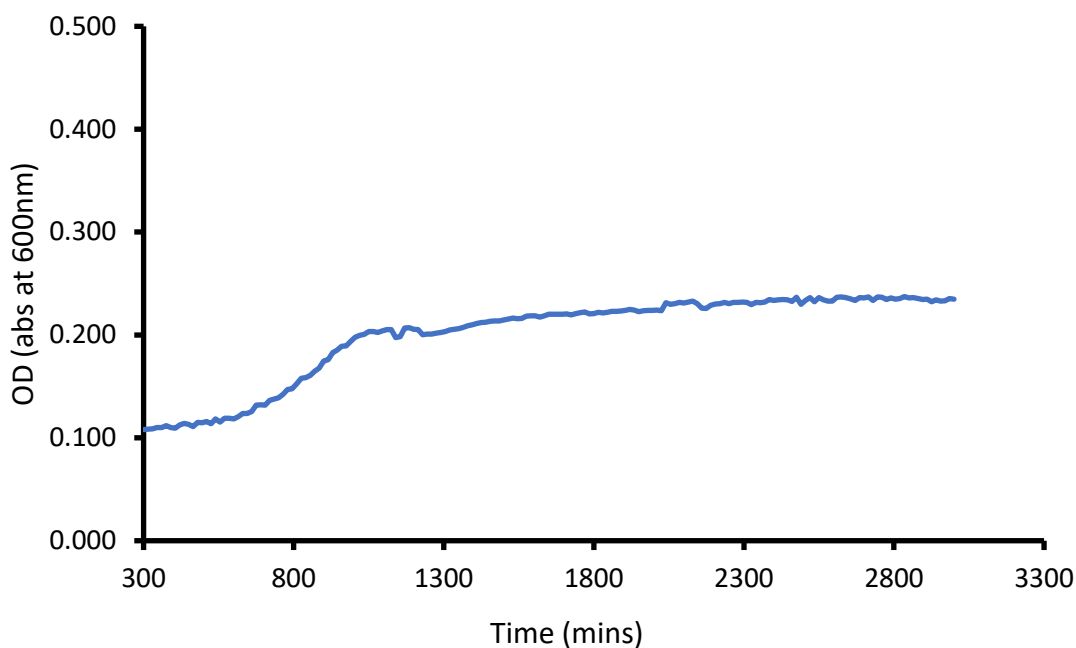

Figure S87: *S. pombe* growth curve. Data shown represents an average of three experiments. Graph shows the addition of 1:19 EtOH:H<sub>2</sub>O solution of **8** (10 mM, 60  $\mu$ L) to a suspension of cells (density =  $0.5 \times 10^6$  cells/mL) in EMMG media (120  $\mu$ L). Data displayed from 300 minutes due to initial plate reader calibration.

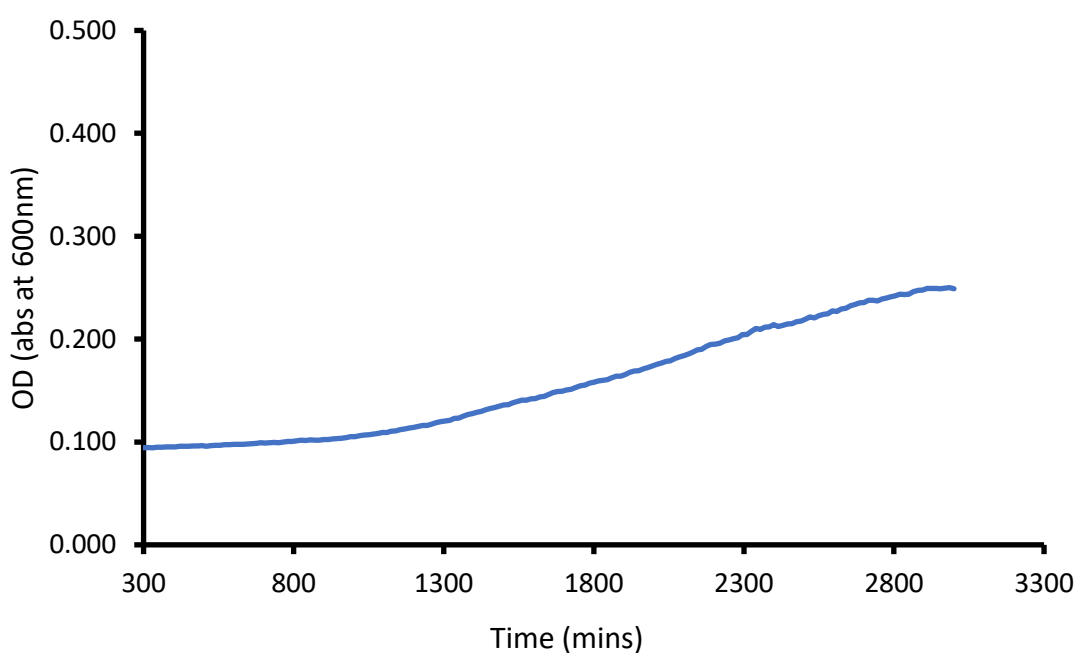

Figure S88: *S. pombe* growth curve. Data shown represents an average of three experiments. Graph shows the addition of 1:19 EtOH:H<sub>2</sub>O solution of **9** (10 mM, 60  $\mu$ L) to a suspension of cells (density =  $0.5 \times 10^6$  cells/mL) in EMMG media (120  $\mu$ L). Data displayed from 300 minutes due to initial plate reader calibration.



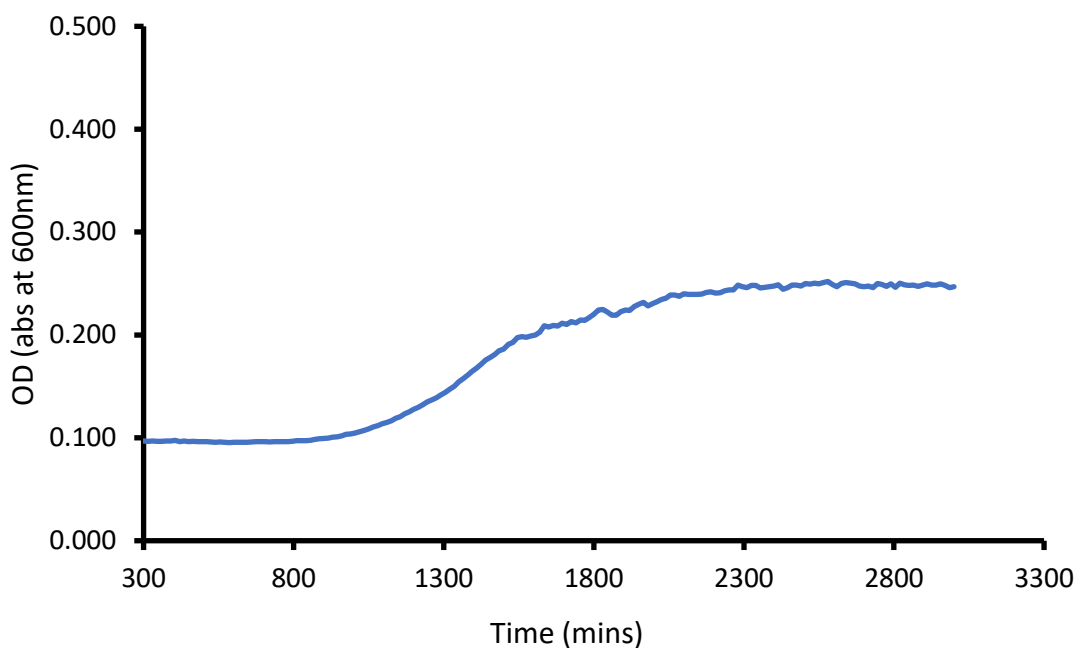

Figure S89: *S. pombe* toxicity screening study. Data shown represents an average of three experiments. Graph shows the addition of 1:19 EtOH:H<sub>2</sub>O solution of **10** (10 mM, 60  $\mu$ L) to a suspension of cells (density =  $0.5 \times 10^6$  cells/mL) in EMMG media (120  $\mu$ L). Data displayed from 300 minutes due to initial plate reader calibration.

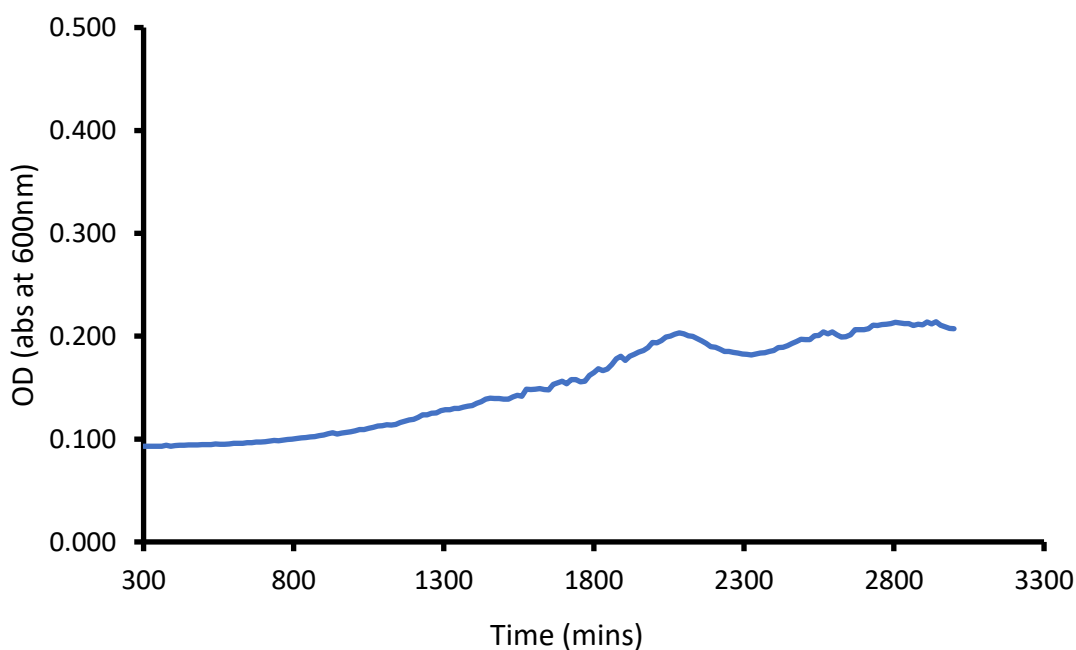

Figure S90: *S. pombe* growth curve. Data shown represents an average of three experiments. Graph shows the addition of 1:19 EtOH:H<sub>2</sub>O solution of **11** (10 mM, 60  $\mu$ L) to a suspension of cells (density =  $0.5 \times 10^6$  cells/mL) in EMMG media (120  $\mu$ L). Data displayed from 300 minutes due to initial plate reader calibration.

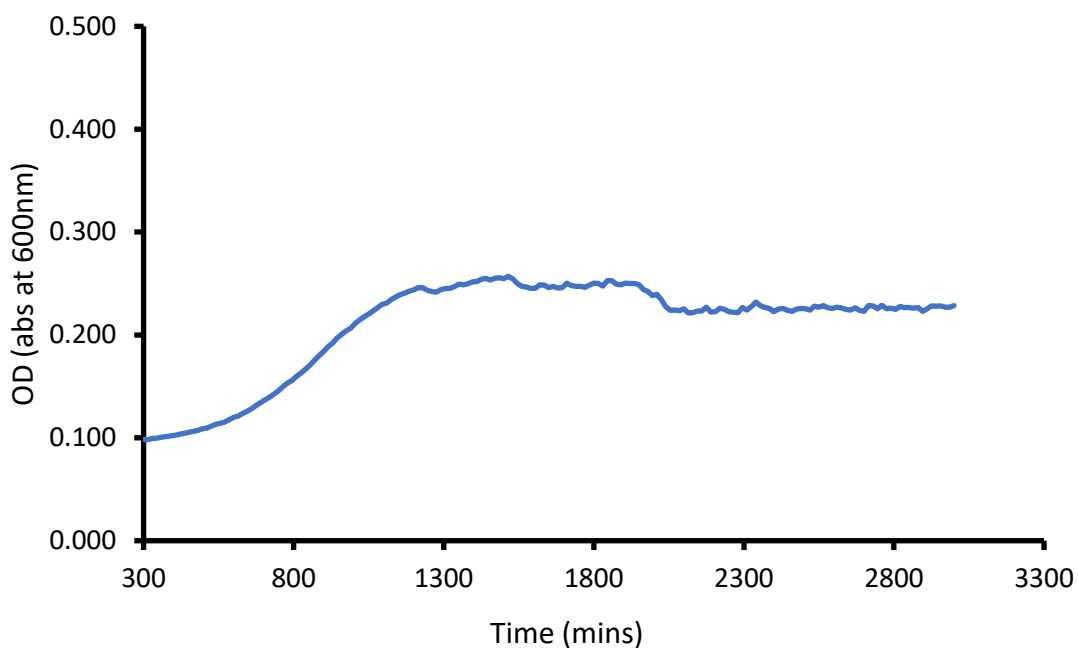

Figure S91: *S. pombe* growth curve. Data shown represents an average of three experiments. Graph shows the addition of 1:19 EtOH:H<sub>2</sub>O solution of **12** (10 mM, 60  $\mu$ L) to a suspension of cells (density =  $0.5 \times 10^6$  cells/mL) in EMMG media (120  $\mu$ L). Data displayed from 300 minutes due to initial plate reader calibration.

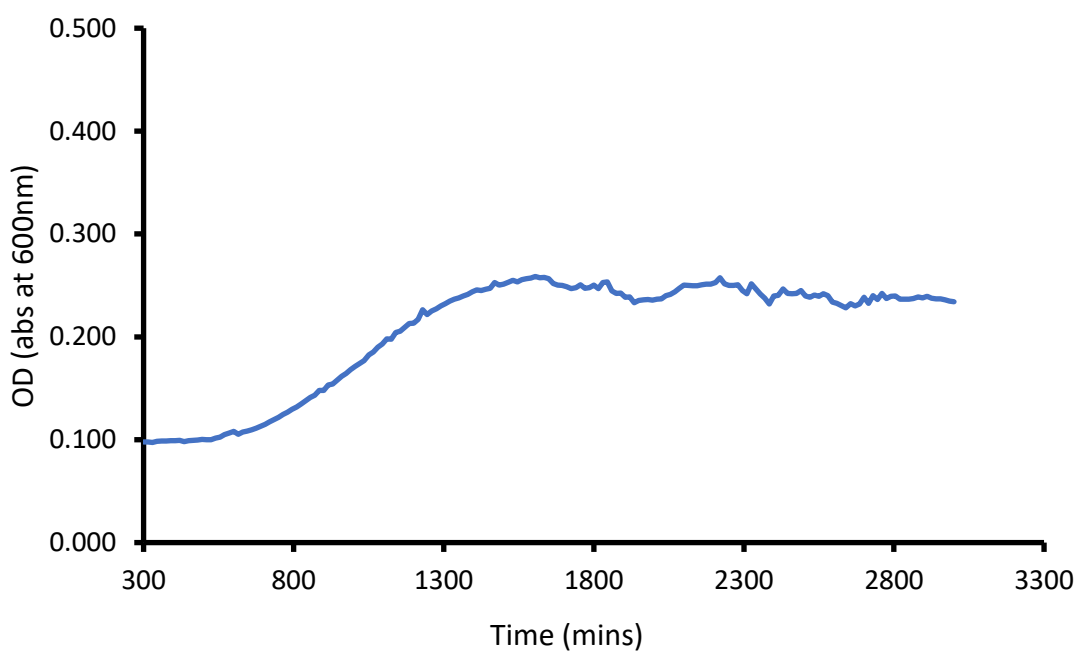

Figure S92: *S. pombe* growth curve. Data shown represents an average of three experiments. Graph shows the addition of 1:19 EtOH:H<sub>2</sub>O solution of **16** (10 mM, 60  $\mu$ L) to a suspension of cells (density =  $0.5 \times 10^6$  cells/mL) in EMMG media (120  $\mu$ L). Data displayed from 300 minutes due to initial plate reader calibration.

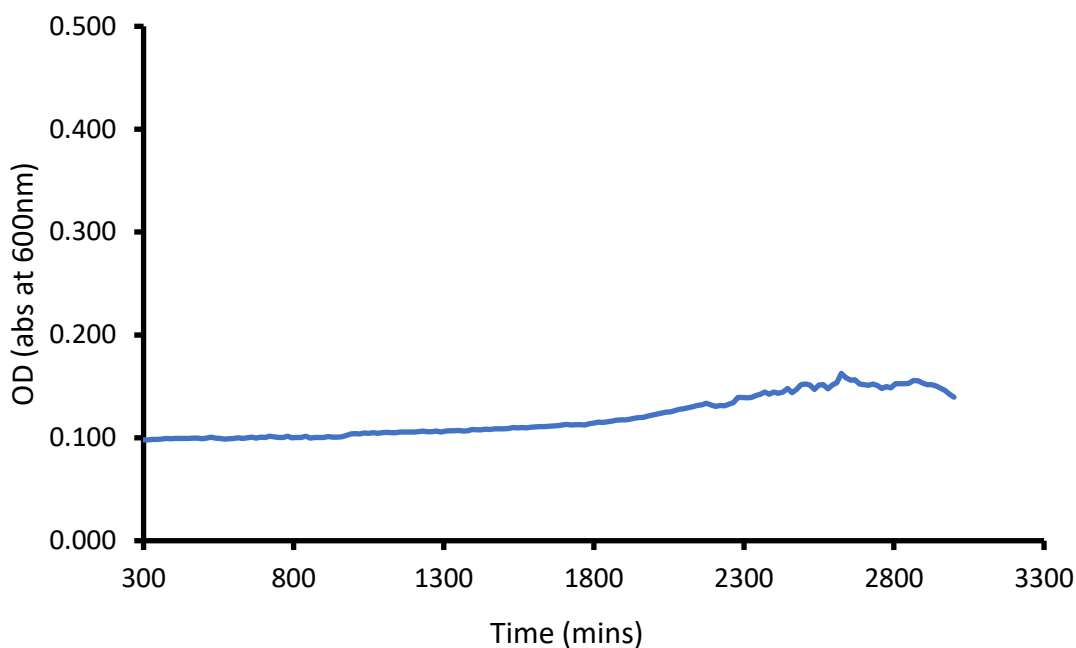

Figure S93: *S. pombe* growth curve. Data shown represents an average of three experiments. Graph shows the addition of 1:19 EtOH:H<sub>2</sub>O solution of **17** (10 mM, 60  $\mu$ L) to a suspension of cells (density =  $0.5 \times 10^6$  cells/mL) in EMMG media (120  $\mu$ L). Data displayed from 300 minutes due to initial plate reader calibration.

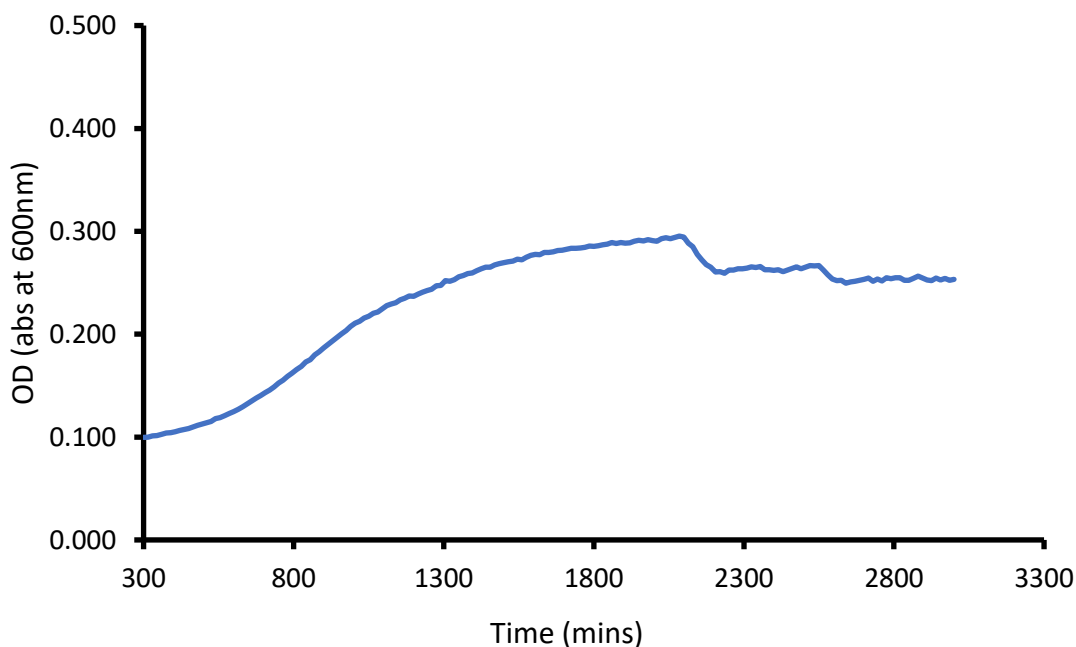

Figure S94: *S. pombe* growth curve. Data shown represents an average of three experiments. Graph shows the addition of 1:19 EtOH:H<sub>2</sub>O solution of **18** (10 mM, 60  $\mu$ L) to a suspension of cells (density =  $0.5 \times 10^6$  cells/mL) in EMMG media (120  $\mu$ L). Data displayed from 300 minutes due to initial plate reader calibration.

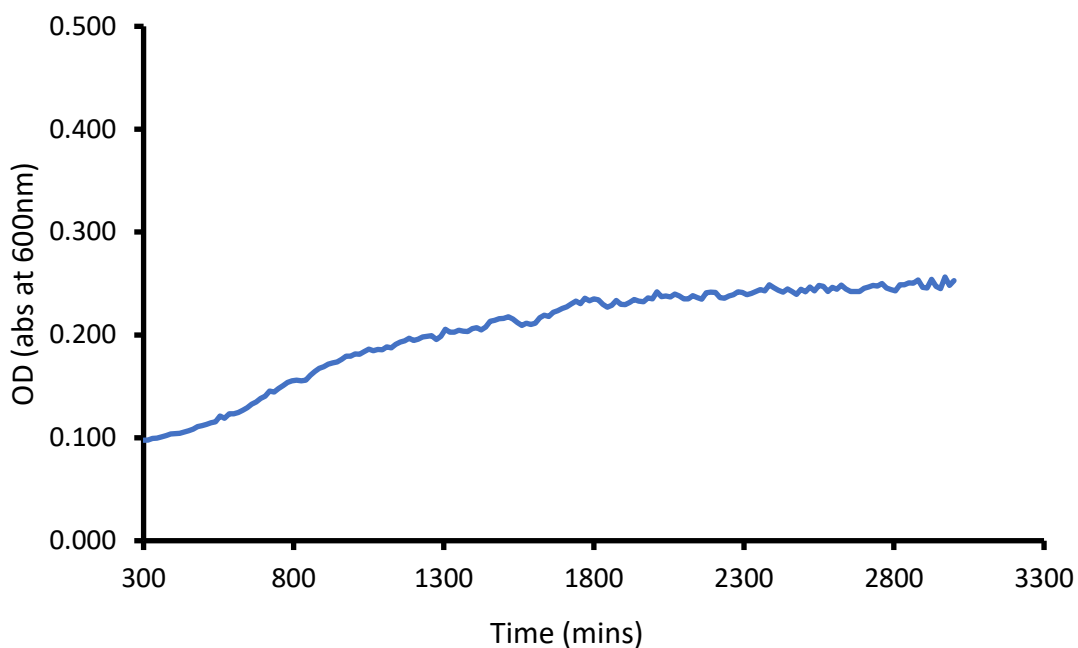

Figure S95: *S. pombe* growth curve. Data shown represents an average of three experiments. Graph shows the addition of 1:19 EtOH:H<sub>2</sub>O solution of **19** (10 mM, 60  $\mu$ L) to a suspension of cells (density =  $0.5 \times 10^6$  cells/mL) in EMMG media (120  $\mu$ L). Data displayed from 300 minutes due to initial plate reader calibration.

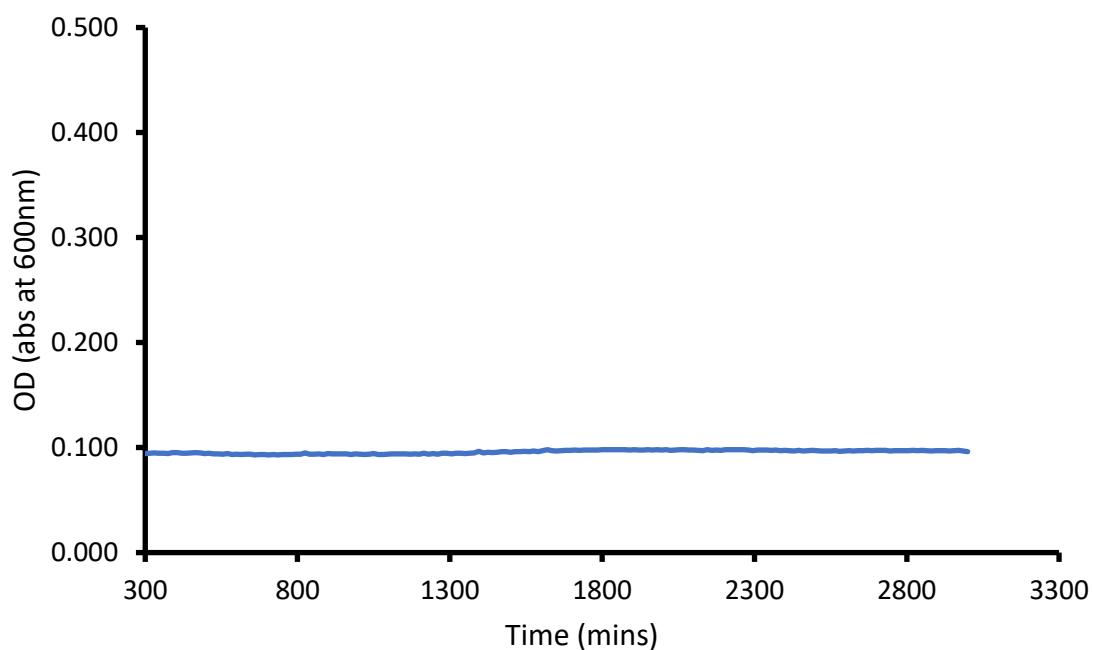

Figure S96: *S. pombe* growth curve. Data shown represents an average of three experiments. Graph shows the addition of 1:19 EtOH:H<sub>2</sub>O solution of **20** (10 mM, 60  $\mu$ L) to a suspension of cells (density =  $0.5 \times 10^6$  cells/mL) in EMMG media (120  $\mu$ L). Data displayed from 300 minutes due to initial plate reader calibration.

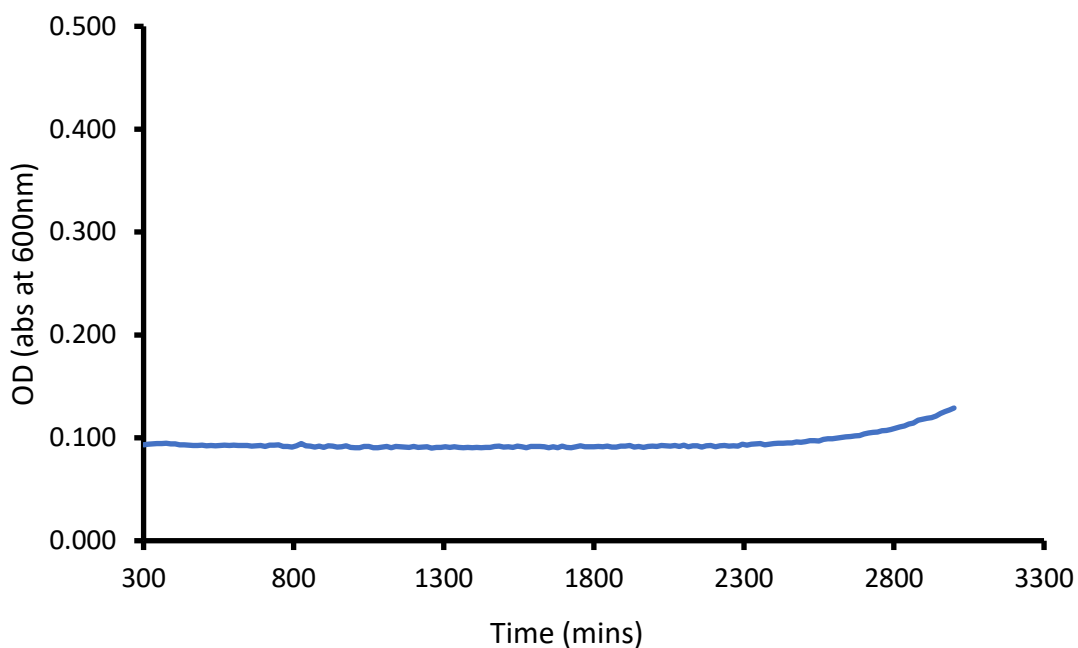

Figure S97: *S. pombe* growth curve. Data shown represents an average of three experiments. Graph shows the addition of 1:19 EtOH:H<sub>2</sub>O solution of **21** (10 mM, 60  $\mu$ L) to a suspension of cells (density =  $0.5 \times 10^6$  cells/mL) in EMMG media (120  $\mu$ L). Data displayed from 300 minutes due to initial plate reader calibration.

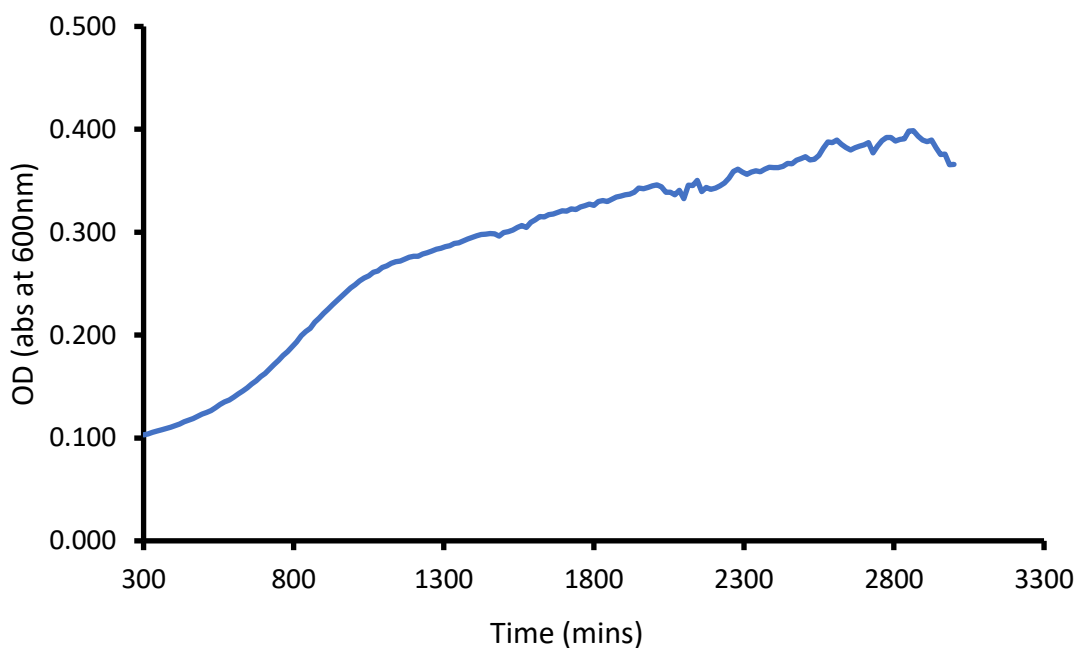

Figure S98: *S. pombe* growth curve. Data shown represents an average of three experiments. Graph shows the addition of 1:19 EtOH:H<sub>2</sub>O solution of **22** (10 mM, 60  $\mu$ L) to a suspension of cells (density =  $0.5 \times 10^6$  cells/mL) in EMMG media (120  $\mu$ L). Data displayed from 300 minutes due to initial plate reader calibration.

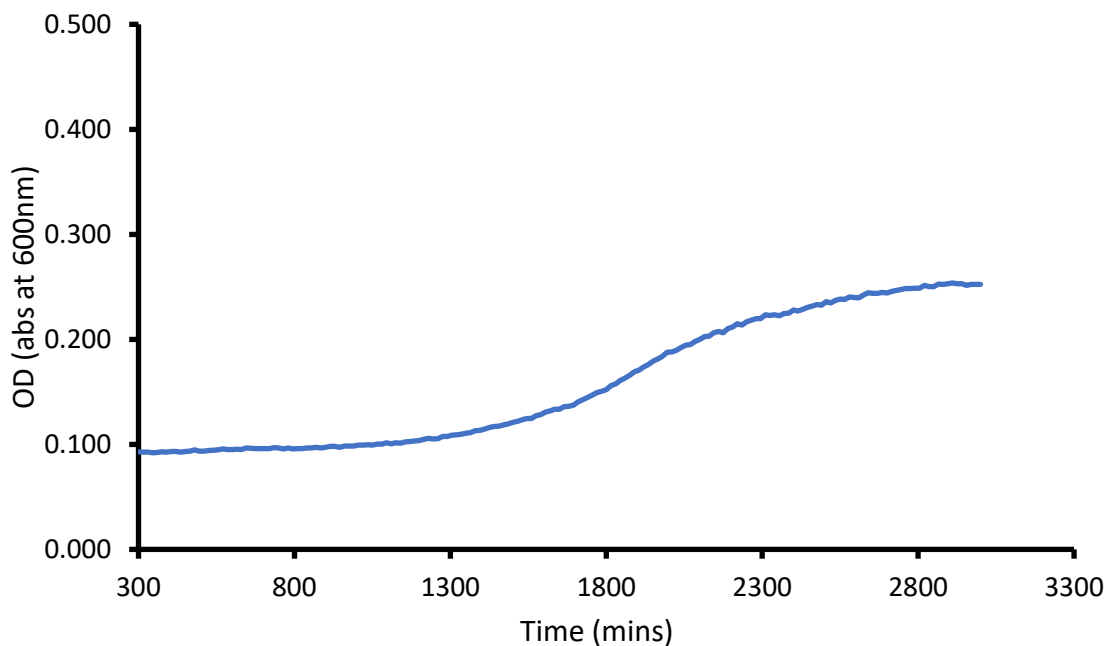

Figure S99: *S. pombe* growth curve. Data shown represents an average of three experiments. Graph shows the addition of 1:19 EtOH:H<sub>2</sub>O solution of **23** (10 mM, 60  $\mu$ L) to a suspension of cells (density =  $0.5 \times 10^6$  cells/mL) in EMMG media (120  $\mu$ L). Data displayed from 300 minutes due to initial plate reader calibration.

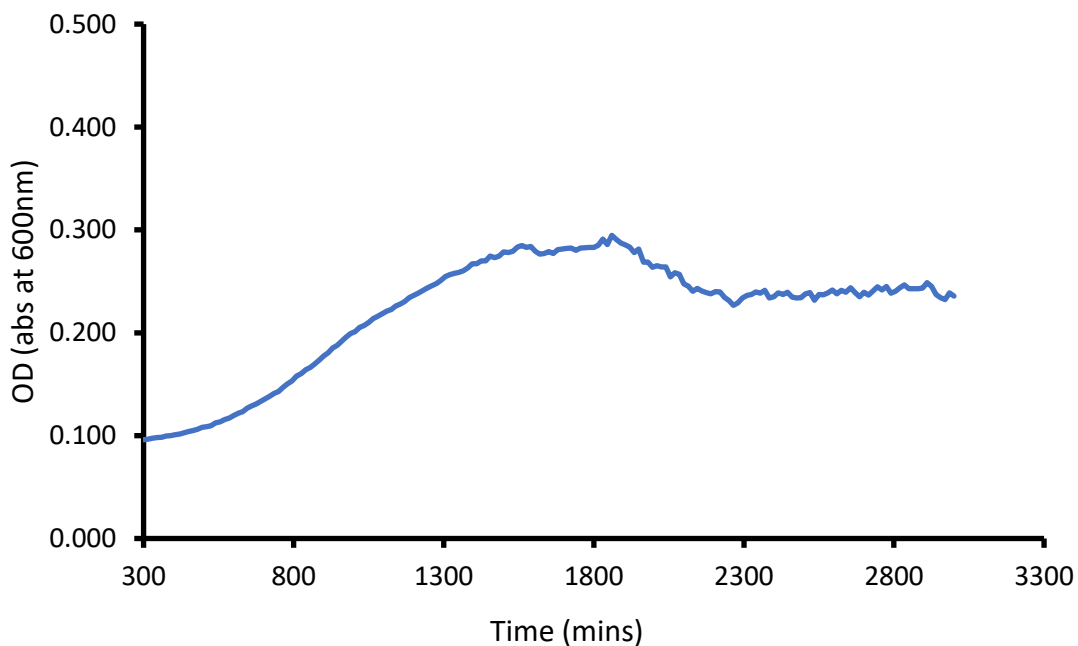

Figure S100: *S. pombe* growth curve. Data shown represents an average of three experiments. Graph shows the addition of 1:19 EtOH:H<sub>2</sub>O solution of **24** (10 mM, 60  $\mu$ L) to a suspension of cells (density =  $0.5 \times 10^6$  cells/mL) in EMMG media (120  $\mu$ L). Data displayed from 300 minutes due to initial plate reader calibration.

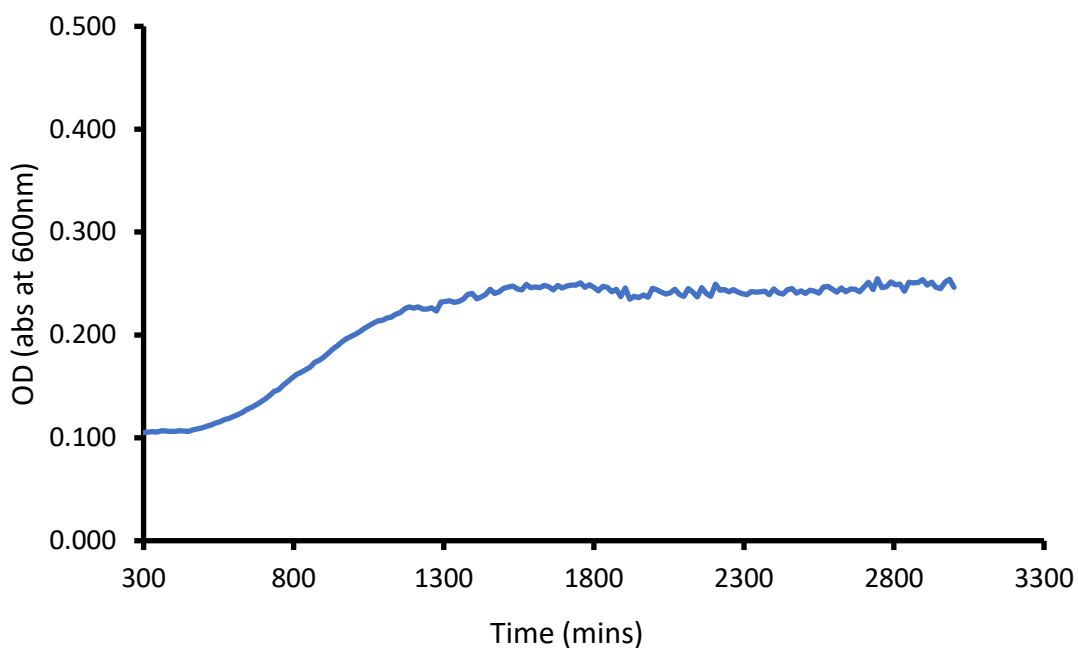

Figure S101: *S. pombe* growth curve. Data shown represents an average of three experiments. Graph shows the addition of 1:19 EtOH:H<sub>2</sub>O solution of **25** (10 mM, 60  $\mu$ L) to a suspension of cells (density =  $0.5 \times 10^6$  cells/mL) in EMMG media (120  $\mu$ L). Data displayed from 300 minutes due to initial plate reader calibration.

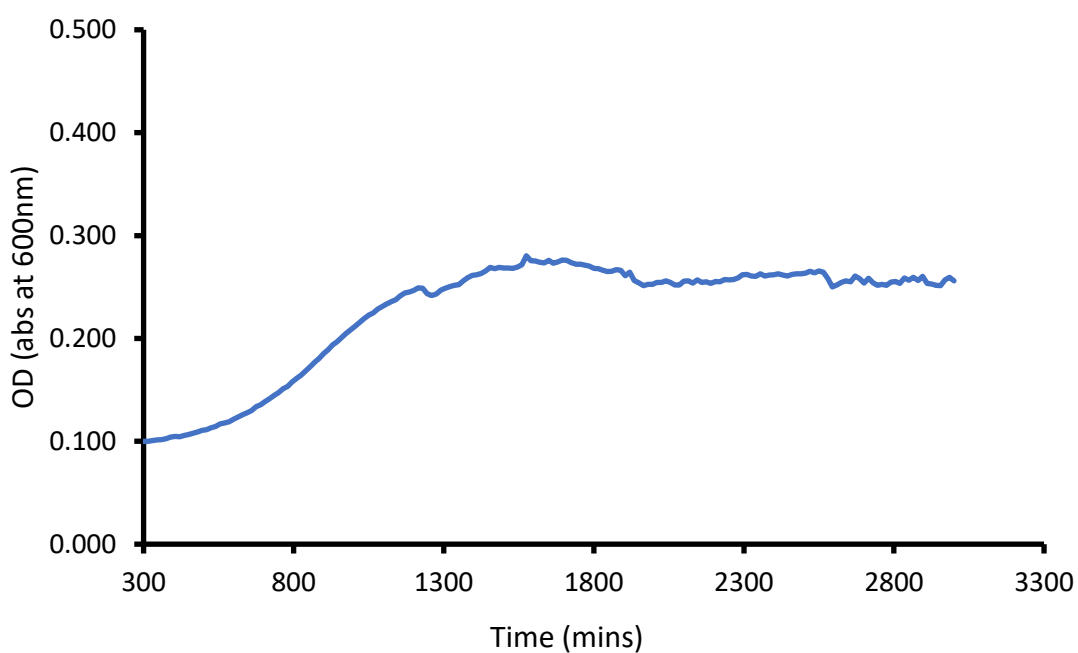

Figure S102: *S. pombe* growth curve. Data shown represents an average of three experiments. Graph shows the addition of 1:19 EtOH:H<sub>2</sub>O solution of **26** (10 mM, 60  $\mu$ L) to a suspension of cells (density =  $0.5 \times 10^6$  cells/mL) in EMMG media (120  $\mu$ L). Data displayed from 300 minutes due to initial plate reader calibration.

Table S2: Summary of the *S. pombe* growth curve results showing the percentage cellular growth in comparison to a control solution after 45 hours.

| No        | %    | No        | %     | No        | %     | No        | %    |
|-----------|------|-----------|-------|-----------|-------|-----------|------|
| <b>5</b>  | 92.5 | <b>11</b> | 77.7  | <b>20</b> | 95.4  | <b>26</b> | 92.9 |
| <b>6</b>  | 77.9 | <b>12</b> | 83.5  | <b>21</b> | 49.2  |           |      |
| <b>7</b>  | 79.1 | <b>16</b> | 93.5  | <b>22</b> | 131.7 |           |      |
| <b>8</b>  | 82.2 | <b>17</b> | 101   | <b>23</b> | 94.1  |           |      |
| <b>9</b>  | 92.4 | <b>18</b> | 92.0  | <b>24</b> | 86.9  |           |      |
| <b>10</b> | 90.7 | <b>19</b> | 103.6 | <b>25</b> | 87.5  |           |      |



## Low level PM6 modelling

Computational calculations to identify primary hydrogen bond donating and accepting sites were conducted in line with studies reported by Hunter using Spartan 16'.<sup>13</sup> Calculations were performed using semi-empirical PM6 methods, after energy minimisation calculations, to identify  $E_{\min}$  and polarizability values. PM6 was used over AM1 in line with research conducted by Stewart.<sup>14</sup> To estimate the accessibility of the principle HBA site towards supramolecular coordination, the area of the ESPM within  $1/8^{\text{th}}$  of the  $E_{\min}$  for the principle HBA group, and has been termed the 'steric weighting factor' (SWF) for ease of reference. The SWF was considered for either one or two sulfonate oxygen atoms for **16-26**.

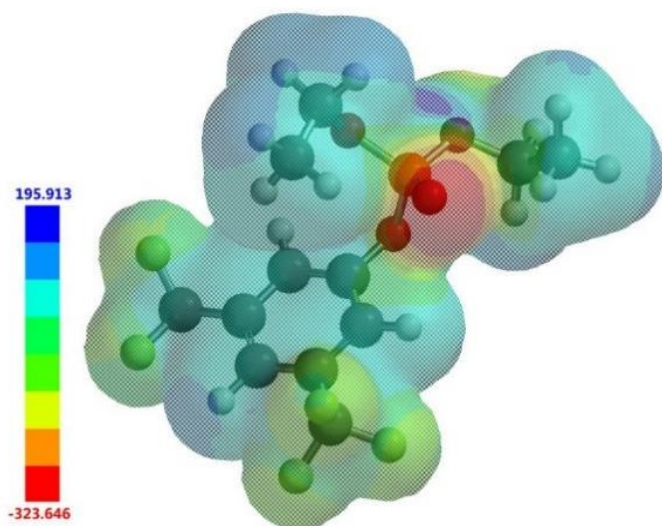

Figure S103: Electrostatic potential map calculated for compound **5**.  $E_{\max}$  (deep blue) and  $E_{\min}$  (bright red) values depicted in the Figure legends are given in kJ/mol. The area of the electrostatic potential map displayed in red is within  $1/8^{\text{th}}$  of the  $E_{\min}$  and is termed the 'steric weighting factor' (SWF). The area of the electrostatic potential map displayed in deep blue is within  $1/8^{\text{th}}$  of the  $E_{\max}$  and is termed the 'steric accessibility factor' (SAF).

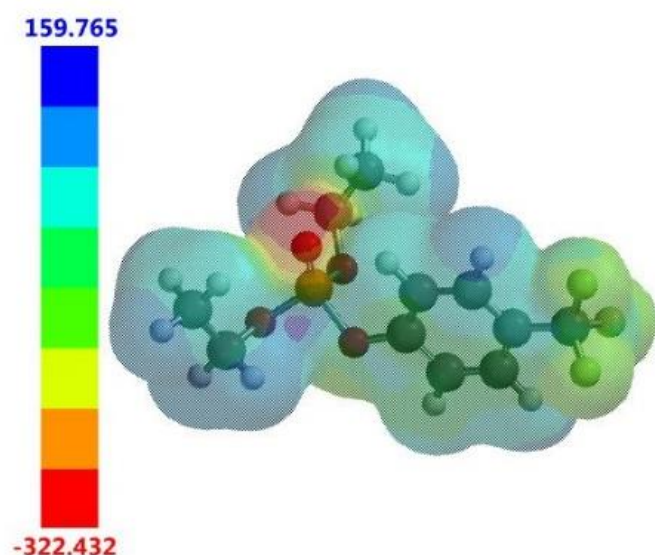

Figure S104: Electrostatic potential map calculated for compound **6**.  $E_{\max}$  and  $E_{\min}$  values depicted in the Figure legends are given in kJ/mol. The area of the electrostatic potential map displayed in red is within  $1/8^{\text{th}}$  of the  $E_{\min}$  and is termed the 'steric weighting factor' (SWF). The area of the electrostatic potential map displayed in deep blue is within  $1/8^{\text{th}}$  of the  $E_{\max}$  and is termed the 'steric accessibility factor' (SAF).

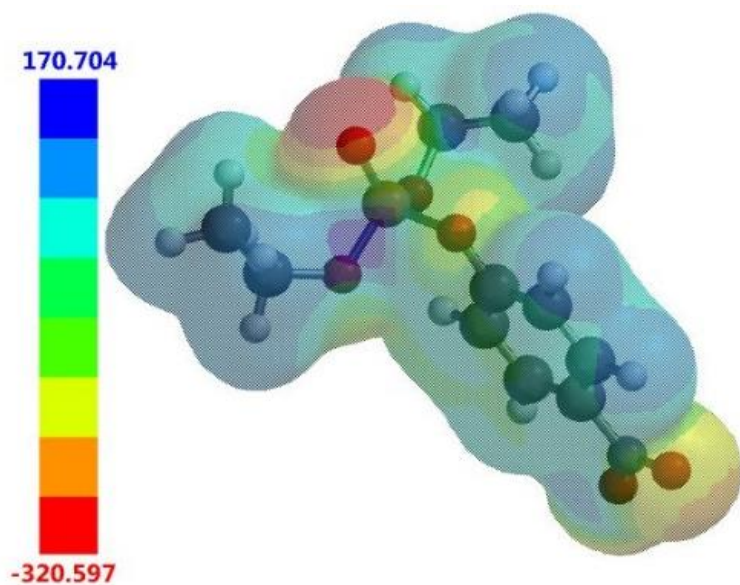

Figure S105: Electrostatic potential map calculated for compound **7**.  $E_{\max}$  and  $E_{\min}$  values depicted in the Figure legends are given in kJ/mol. The area of the electrostatic potential map displayed in red is within  $1/8^{\text{th}}$  of the  $E_{\min}$  and is termed the ‘steric weighting factor’ (SWF). The area of the electrostatic potential map displayed in deep blue is within  $1/8^{\text{th}}$  of the  $E_{\max}$  and is termed the ‘steric accessibility factor’ (SAF).

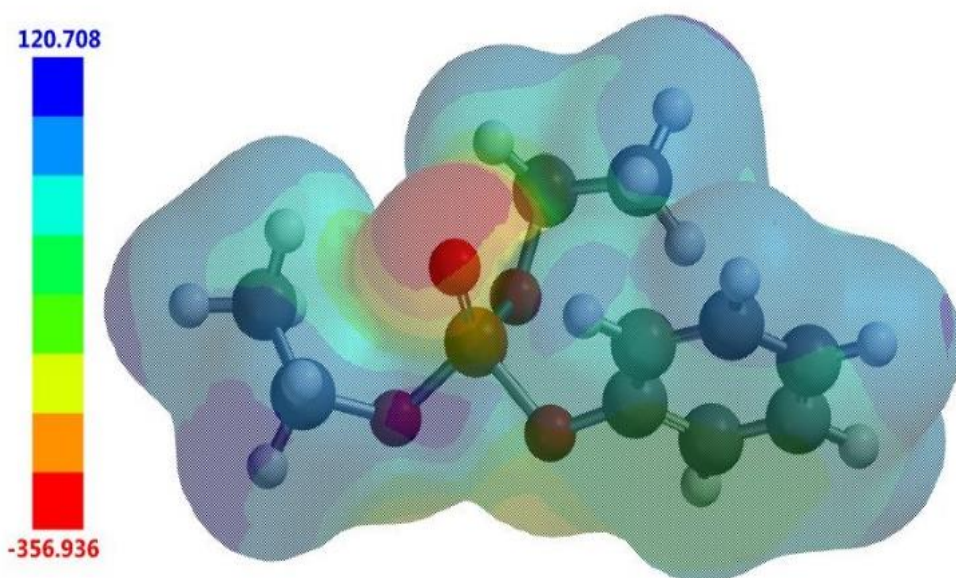

Figure S106: Electrostatic potential map calculated for compound **8**.  $E_{\max}$  and  $E_{\min}$  values depicted in the Figure legends are given in kJ/mol. The area of the electrostatic potential map displayed in red is within  $1/8^{\text{th}}$  of the  $E_{\min}$  and is termed the ‘steric weighting factor’ (SWF). The area of the electrostatic potential map displayed in deep blue is within  $1/8^{\text{th}}$  of the  $E_{\max}$  and is termed the ‘steric accessibility factor’ (SAF).

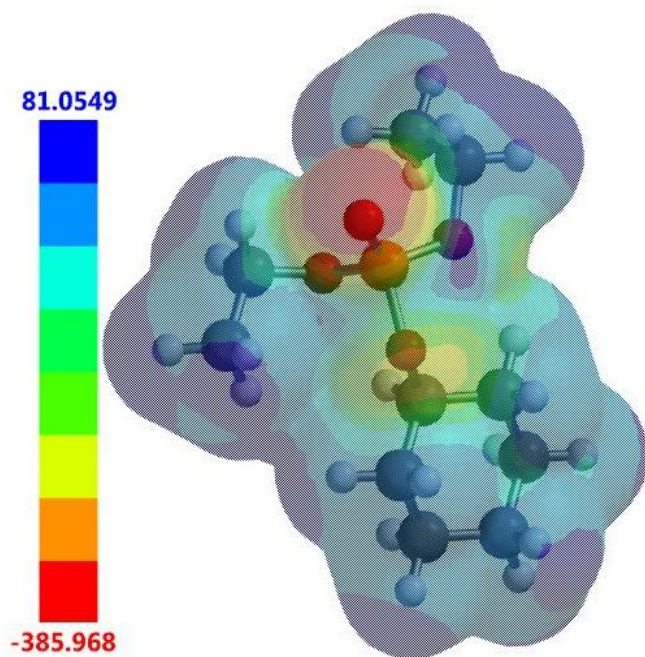

Figure S107: Electrostatic potential map calculated for compound **9**.  $E_{\max}$  and  $E_{\min}$  values depicted in the Figure legends are given in kJ/mol. The area of the electrostatic potential map displayed in red is within  $1/8^{\text{th}}$  of the  $E_{\min}$  and is termed the ‘steric weighting factor’ (SWF). The area of the electrostatic potential map displayed in deep blue is within  $1/8^{\text{th}}$  of the  $E_{\max}$  and is termed the ‘steric accessibility factor’ (SAF).

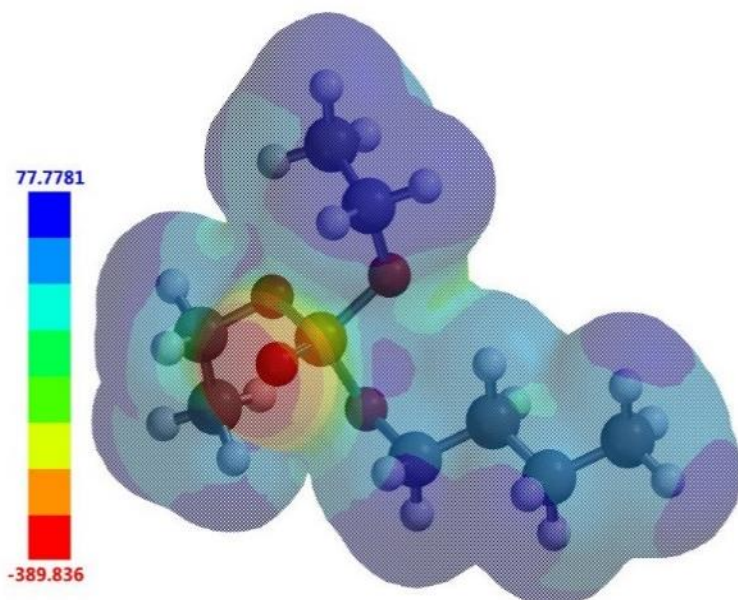

Figure S108: Electrostatic potential map calculated for compound **10**.  $E_{\max}$  and  $E_{\min}$  values depicted in the Figure legends are given in kJ/mol. The area of the electrostatic potential map displayed in red is within  $1/8^{\text{th}}$  of the  $E_{\min}$  and is termed the ‘steric weighting factor’ (SWF). The area of the electrostatic potential map displayed in deep blue is within  $1/8^{\text{th}}$  of the  $E_{\max}$  and is termed the ‘steric accessibility factor’ (SAF).



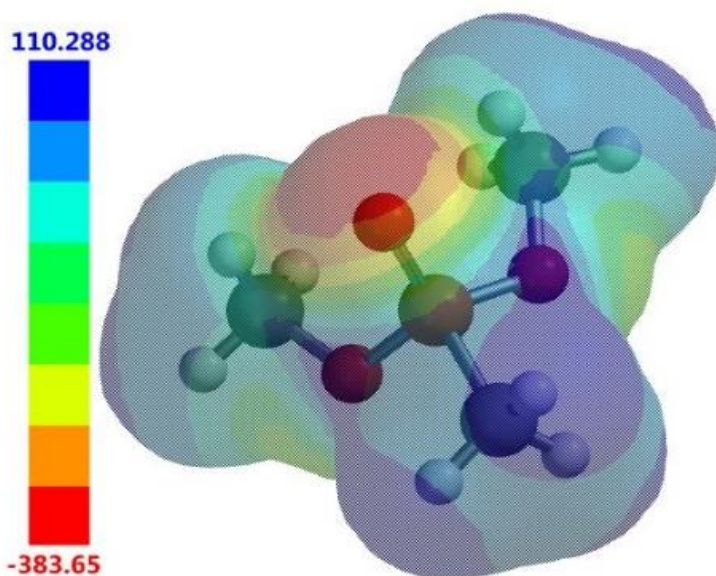

Figure S109: Electrostatic potential map calculated for compound **11**.  $E_{\max}$  and  $E_{\min}$  values depicted in the Figure legends are given in kJ/mol. The area of the electrostatic potential map displayed in red is within 1/8<sup>th</sup> of the  $E_{\min}$  and is termed the ‘steric weighting factor’ (SWF). The area of the electrostatic potential map displayed in deep blue is within 1/8<sup>th</sup> of the  $E_{\max}$  and is termed the ‘steric accessibility factor’ (SAF).

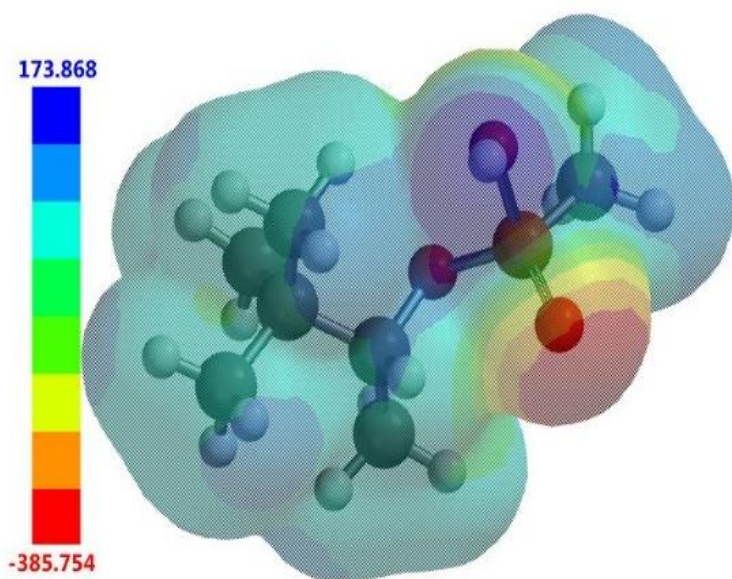

Figure S110: Electrostatic potential map calculated for compound **12**.  $E_{\max}$  and  $E_{\min}$  values depicted in the Figure legends are given in kJ/mol. The area of the electrostatic potential map displayed in red is within 1/8<sup>th</sup> of the  $E_{\min}$  and is termed the ‘steric weighting factor’ (SWF). The area of the electrostatic potential map displayed in deep blue is within 1/8<sup>th</sup> of the  $E_{\max}$  and is termed the ‘steric accessibility factor’ (SAF).

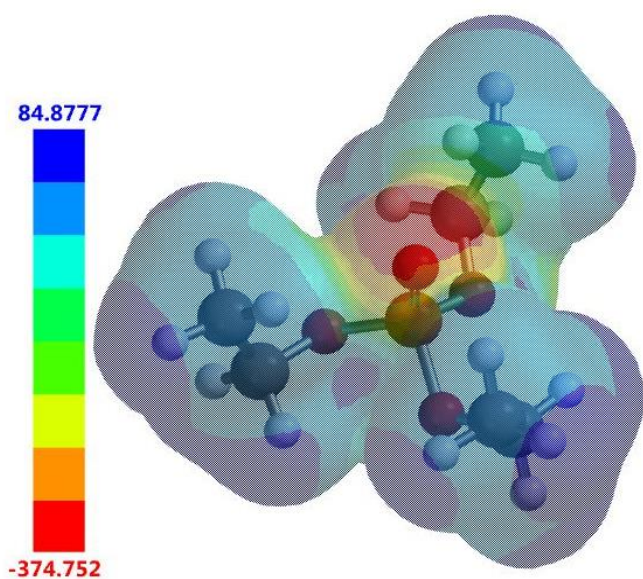

Figure S111: Electrostatic potential map calculated for compound **13**.  $E_{\max}$  and  $E_{\min}$  values depicted in the Figure legends are given in kJ/mol. The area of the electrostatic potential map displayed in red is within  $1/8^{\text{th}}$  of the  $E_{\min}$  and is termed the ‘steric weighting factor’ (SWF). The area of the electrostatic potential map displayed in deep blue is within  $1/8^{\text{th}}$  of the  $E_{\max}$  and is termed the ‘steric accessibility factor’ (SAF).

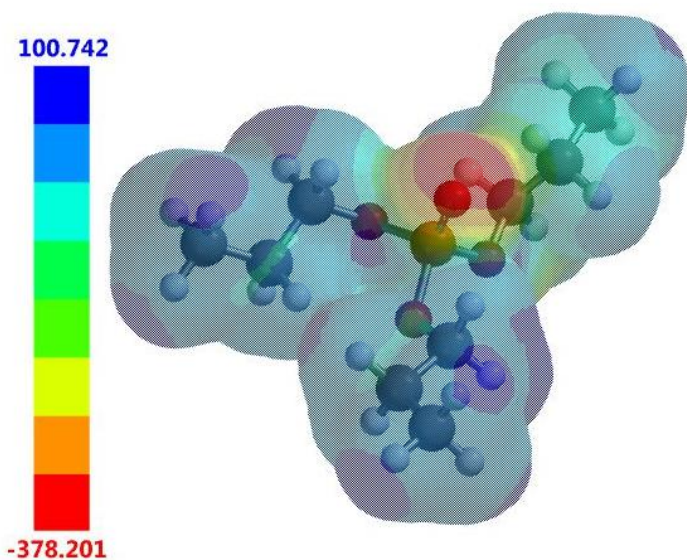

Figure S112: Electrostatic potential map calculated for compound **14**.  $E_{\max}$  and  $E_{\min}$  values depicted in the Figure legends are given in kJ/mol. The area of the electrostatic potential map displayed in red is within  $1/8^{\text{th}}$  of the  $E_{\min}$  and is termed the ‘steric weighting factor’ (SWF). The area of the electrostatic potential map displayed in deep blue is within  $1/8^{\text{th}}$  of the  $E_{\max}$  and is termed the ‘steric accessibility factor’ (SAF).



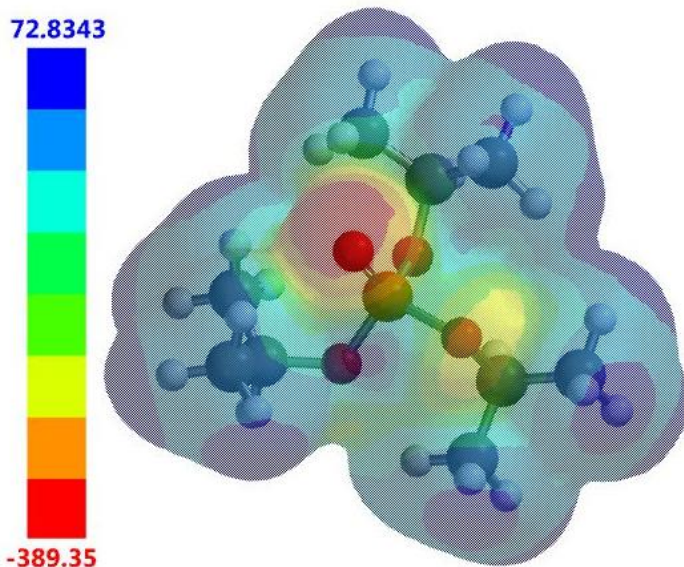

Figure S113: Electrostatic potential map calculated for compound **15**.  $E_{\max}$  and  $E_{\min}$  values depicted in the Figure legends are given in kJ/mol. The area of the electrostatic potential map displayed in red is within  $1/8^{\text{th}}$  of the  $E_{\min}$  and is termed the ‘steric weighting factor’ (SWF). The area of the electrostatic potential map displayed in deep blue is within  $1/8^{\text{th}}$  of the  $E_{\max}$  and is termed the ‘steric accessibility factor’ (SAF).

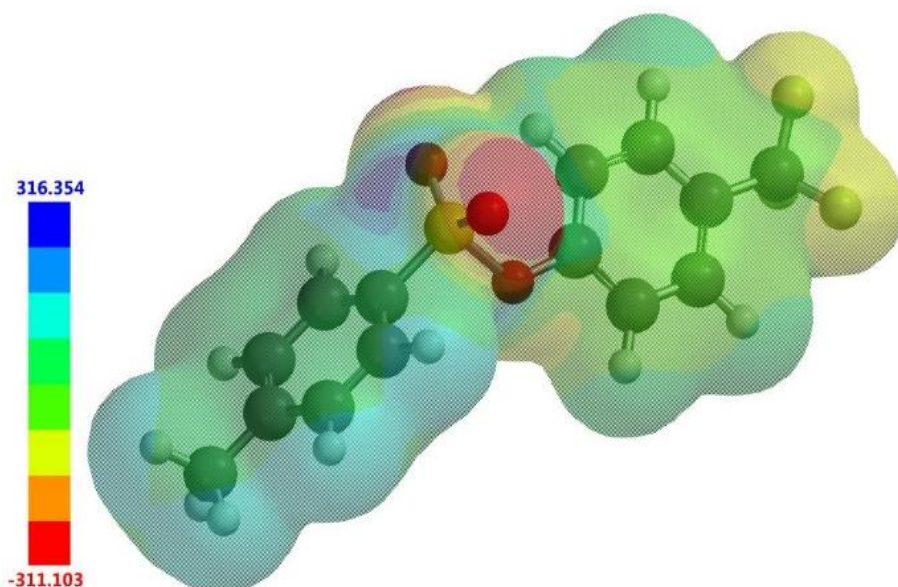

Figure S114: Electrostatic potential map calculated for compound **16**.  $E_{\max}$  and  $E_{\min}$  values depicted in the Figure legends are given in kJ/mol. The area of the electrostatic potential map displayed in red is within  $1/8^{\text{th}}$  of the  $E_{\min}$  and is termed the ‘steric weighting factor’ (SWF). The area of the electrostatic potential map displayed in deep blue is within  $1/8^{\text{th}}$  of the  $E_{\max}$  and is termed the ‘steric accessibility factor’ (SAF).

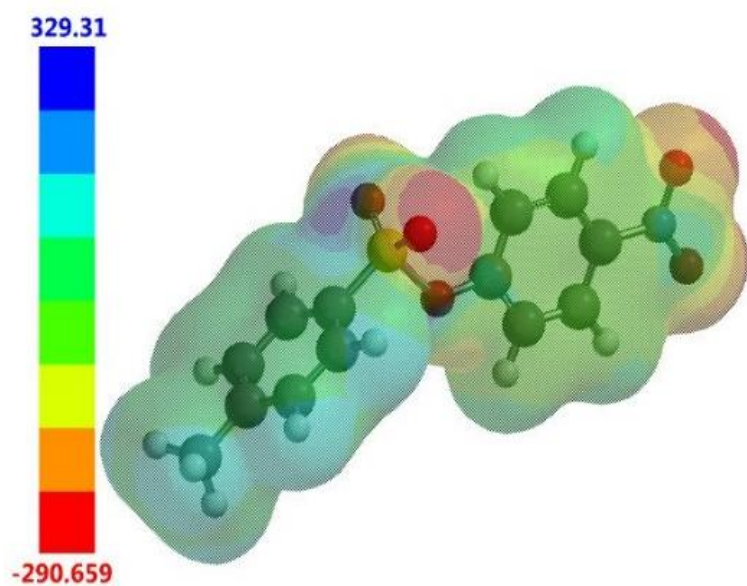

Figure S115: Electrostatic potential map calculated for compound **17**.  $E_{\max}$  and  $E_{\min}$  values depicted in the Figure legends are given in kJ/mol. The area of the electrostatic potential map displayed in red is within 1/8<sup>th</sup> of the  $E_{\min}$  and is termed the ‘steric weighting factor’ (SWF). The area of the electrostatic potential map displayed in deep blue is within 1/8<sup>th</sup> of the  $E_{\max}$  and is termed the ‘steric accessibility factor’ (SAF).

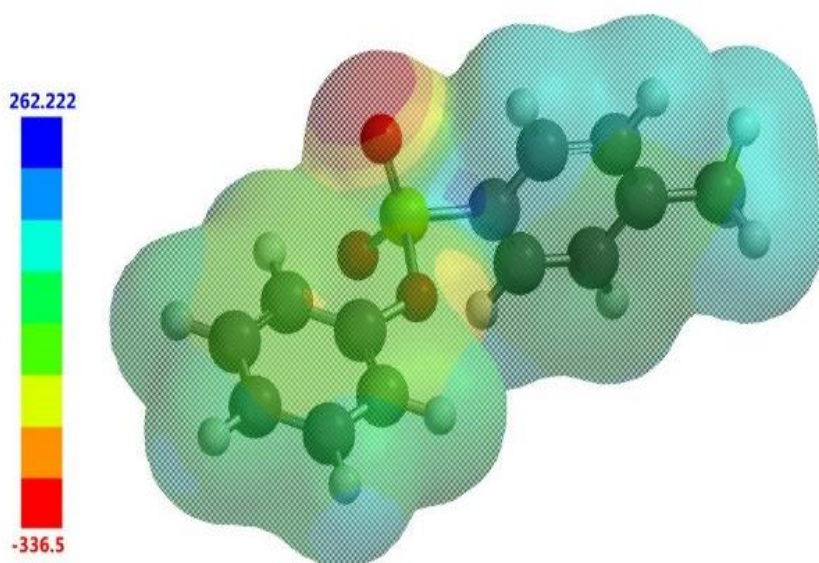

Figure S116: Electrostatic potential map calculated for compound **18**.  $E_{\max}$  and  $E_{\min}$  values depicted in the Figure legends are given in kJ/mol. The area of the electrostatic potential map displayed in red is within 1/8<sup>th</sup> of the  $E_{\min}$  and is termed the ‘steric weighting factor’ (SWF). The area of the electrostatic potential map displayed in deep blue is within 1/8<sup>th</sup> of the  $E_{\max}$  and is termed the ‘steric accessibility factor’ (SAF).

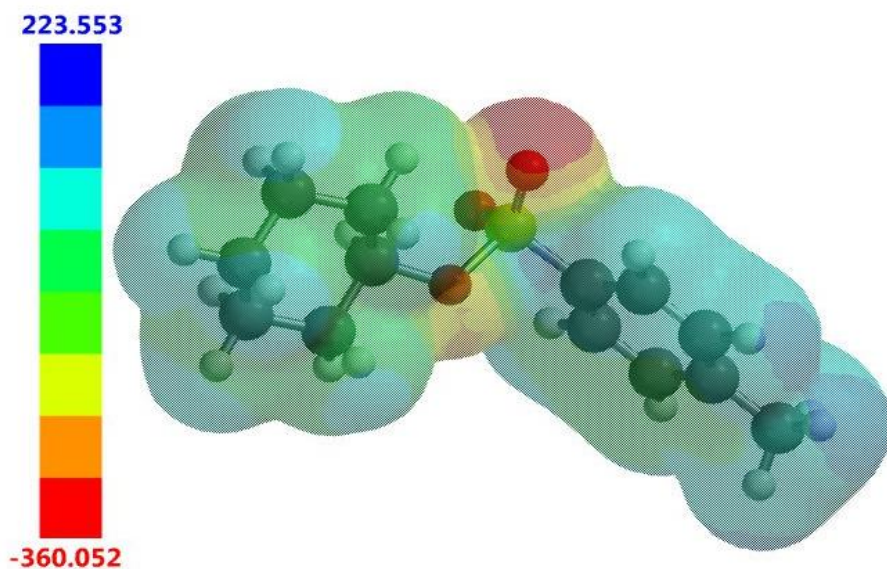

Figure S117: Electrostatic potential map calculated for compound **19**.  $E_{\max}$  and  $E_{\min}$  values depicted in the Figure legends are given in kJ/mol. The area of the electrostatic potential map displayed in red is within  $1/8^{\text{th}}$  of the  $E_{\min}$  and is termed the ‘steric weighting factor’ (SWF). The area of the electrostatic potential map displayed in deep blue is within  $1/8^{\text{th}}$  of the  $E_{\max}$  and is termed the ‘steric accessibility factor’ (SAF).

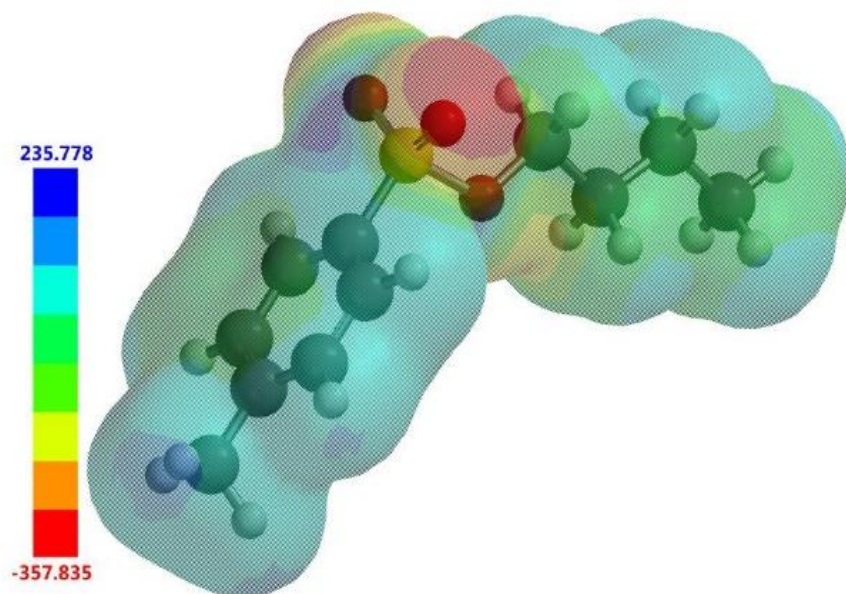

Figure S118: Electrostatic potential map calculated for compound **20**.  $E_{\max}$  and  $E_{\min}$  values depicted in the Figure legends are given in kJ/mol. The area of the electrostatic potential map displayed in red is within  $1/8^{\text{th}}$  of the  $E_{\min}$  and is termed the ‘steric weighting factor’ (SWF). The area of the electrostatic potential map displayed in deep blue is within  $1/8^{\text{th}}$  of the  $E_{\max}$  and is termed the ‘steric accessibility factor’ (SAF).



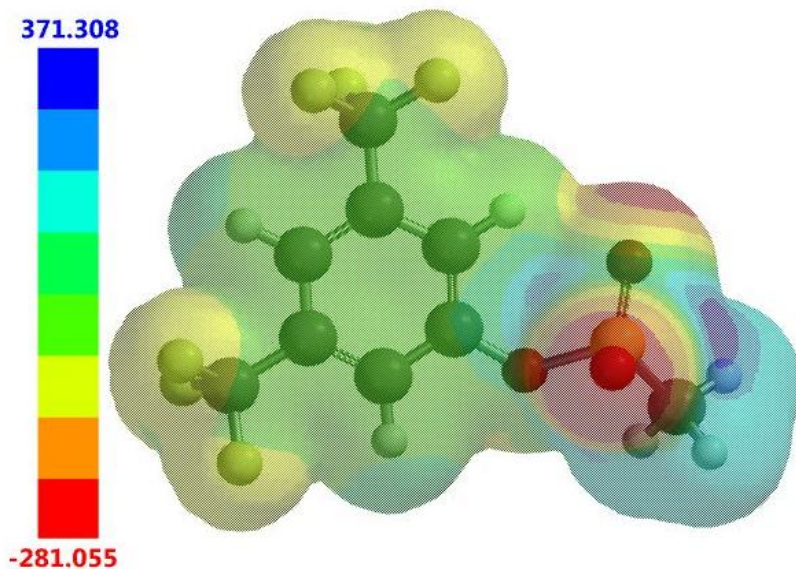

Figure S119: Electrostatic potential map calculated for compound **21**.  $E_{\max}$  and  $E_{\min}$  values depicted in the Figure legends are given in kJ/mol. The area of the electrostatic potential map displayed in red is within  $1/8^{\text{th}}$  of the  $E_{\min}$  and is termed the ‘steric weighting factor’ (SWF). The area of the electrostatic potential map displayed in deep blue is within  $1/8^{\text{th}}$  of the  $E_{\max}$  and is termed the ‘steric accessibility factor’ (SAF).

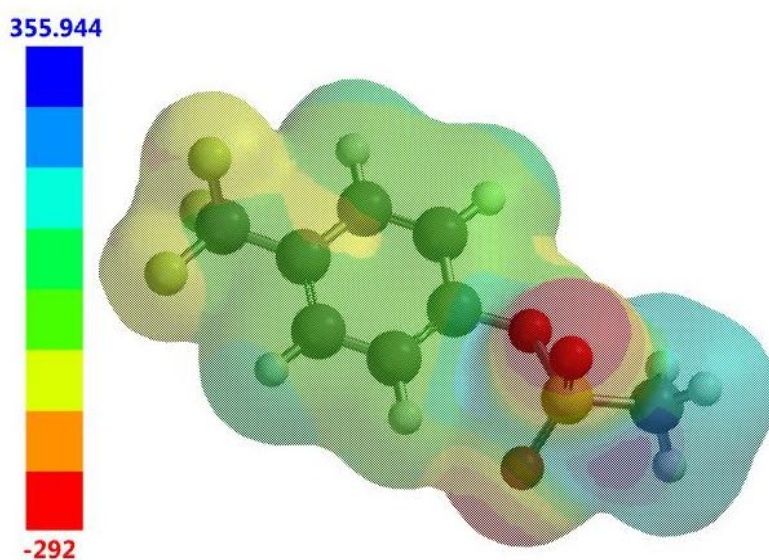

Figure S120: Electrostatic potential map calculated for compound **22**.  $E_{\max}$  and  $E_{\min}$  values depicted in the Figure legends are given in kJ/mol. The area of the electrostatic potential map displayed in red is within  $1/8^{\text{th}}$  of the  $E_{\min}$  and is termed the ‘steric weighting factor’ (SWF). The area of the electrostatic potential map displayed in deep blue is within  $1/8^{\text{th}}$  of the  $E_{\max}$  and is termed the ‘steric accessibility factor’ (SAF).

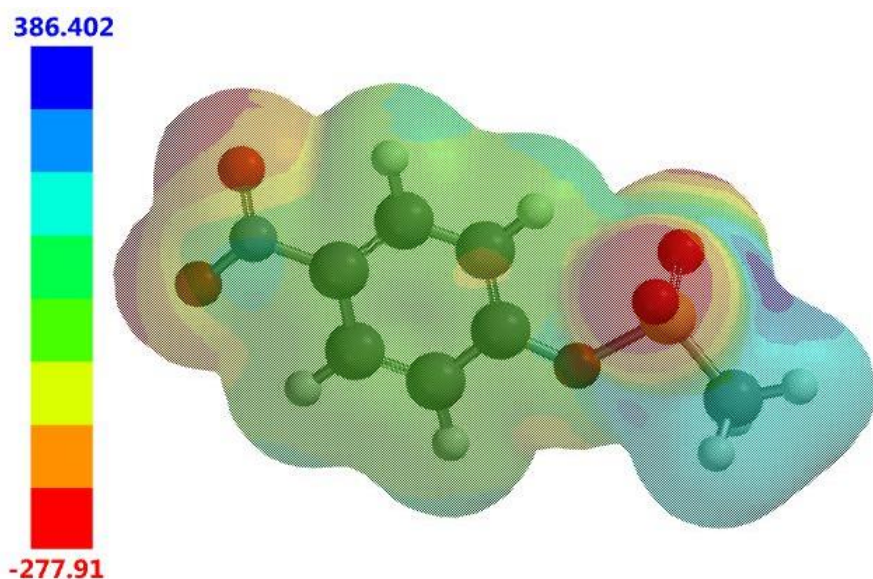

Figure S121: Electrostatic potential map calculated for compound **23**.  $E_{\max}$  and  $E_{\min}$  values depicted in the Figure legends are given in kJ/mol. The area of the electrostatic potential map displayed in red is within  $1/8^{\text{th}}$  of the  $E_{\min}$  and is termed the ‘steric weighting factor’ (SWF). The area of the electrostatic potential map displayed in deep blue is within  $1/8^{\text{th}}$  of the  $E_{\max}$  and is termed the ‘steric accessibility factor’ (SAF).

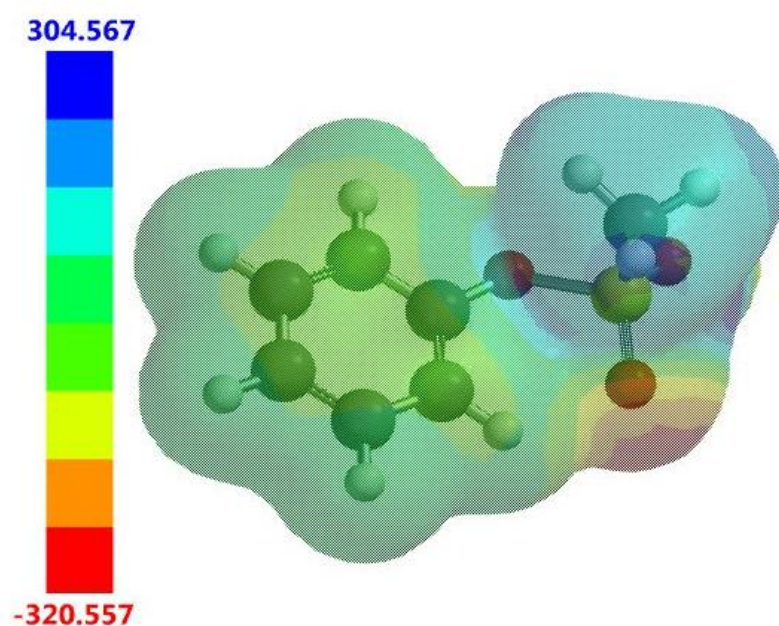

Figure S122: Electrostatic potential map calculated for compound **24**.  $E_{\max}$  and  $E_{\min}$  values depicted in the Figure legends are given in kJ/mol. The area of the electrostatic potential map displayed in red is within  $1/8^{\text{th}}$  of the  $E_{\min}$  and is termed the ‘steric weighting factor’ (SWF). The area of the electrostatic potential map displayed in deep blue is within  $1/8^{\text{th}}$  of the  $E_{\max}$  and is termed the ‘steric accessibility factor’ (SAF).



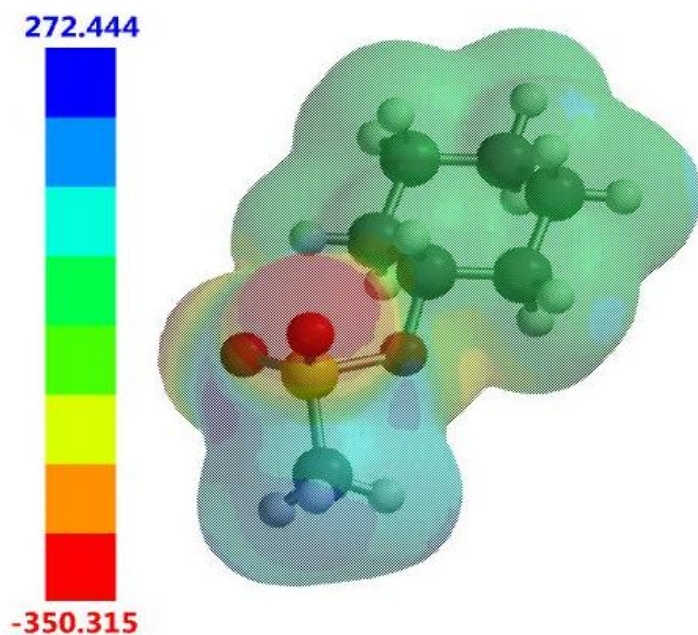

Figure S123: Electrostatic potential map calculated for compound **25**.  $E_{\max}$  and  $E_{\min}$  values depicted in the Figure legends are given in kJ/mol. The area of the electrostatic potential map displayed in red is within  $1/8^{\text{th}}$  of the  $E_{\min}$  and is termed the ‘steric weighting factor’ (SWF). The area of the electrostatic potential map displayed in deep blue is within  $1/8^{\text{th}}$  of the  $E_{\max}$  and is termed the ‘steric accessibility factor’ (SAF).

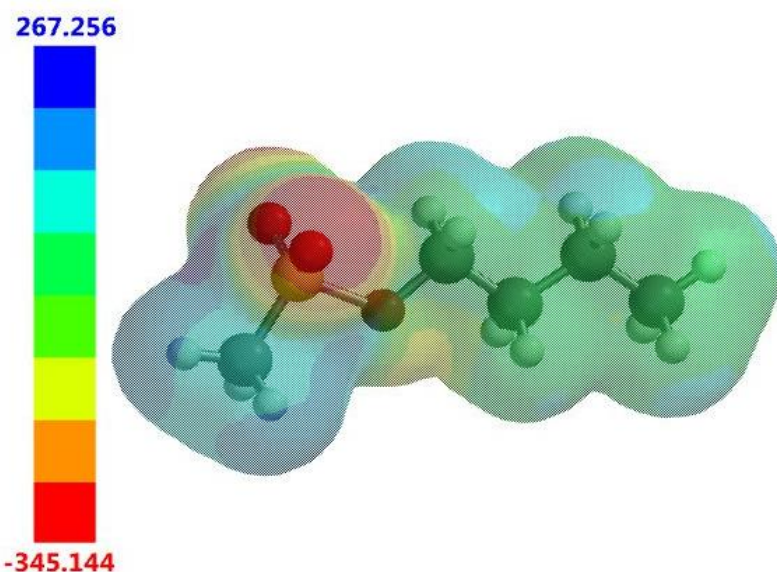

Figure S124: Electrostatic potential map calculated for compound **26**.  $E_{\max}$  and  $E_{\min}$  values depicted in the Figure legends are given in kJ/mol. The area of the electrostatic potential map displayed in red is within  $1/8^{\text{th}}$  of the  $E_{\min}$  and is termed the ‘steric weighting factor’ (SWF). The area of the electrostatic potential map displayed in deep blue is within  $1/8^{\text{th}}$  of the  $E_{\max}$  and is termed the ‘steric accessibility factor’ (SAF).

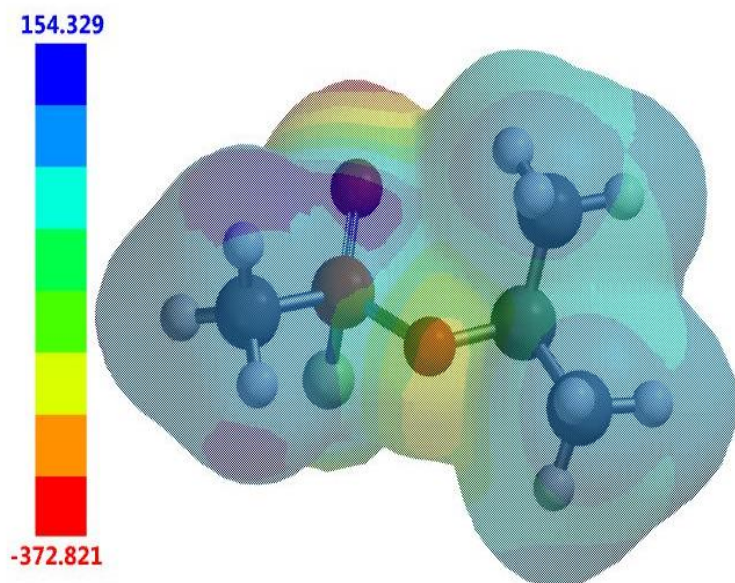

Figure S125: Electrostatic potential map calculated for sarin.  $E_{\max}$  and  $E_{\min}$  values depicted in the Figure legends are given in kJ/mol. The area of the electrostatic potential map displayed in red is within  $1/8^{\text{th}}$  of the  $E_{\min}$  and is termed the ‘steric weighting factor’ (SWF). The area of the electrostatic potential map displayed in deep blue is within  $1/8^{\text{th}}$  of the  $E_{\max}$  and is termed the ‘steric accessibility factor’ (SAF).

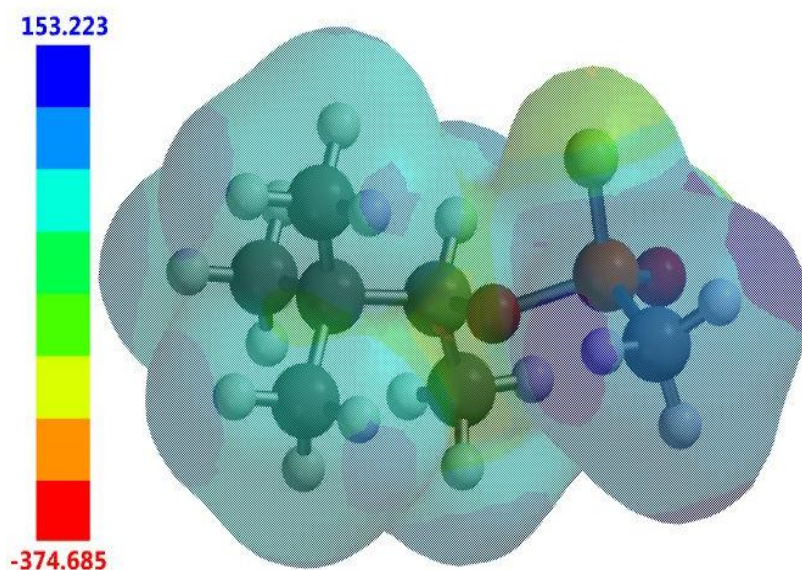

Figure S126: Electrostatic potential map calculated for soman.  $E_{\max}$  and  $E_{\min}$  values depicted in the Figure legends are given in kJ/mol. The area of the electrostatic potential map displayed in red is within  $1/8^{\text{th}}$  of the  $E_{\min}$  and is termed the ‘steric weighting factor’ (SWF). The area of the electrostatic potential map displayed in deep blue is within  $1/8^{\text{th}}$  of the  $E_{\max}$  and is termed the ‘steric accessibility factor’ (SAF).

Table S3: Summary of calculated parameters derived from the electrostatic potential maps calculated by Spartan '16 for compounds **5-27**, sarin and soman.

| Simulant  | $E_{\max}$ (kJmol <sup>-1</sup> ) | $E_{\min}$ (kJmol <sup>-1</sup> ) |
|-----------|-----------------------------------|-----------------------------------|
| <b>5</b>  | 195.91                            | -323.65                           |
| <b>6</b>  | 159.77                            | -322.43                           |
| <b>7</b>  | 170.70                            | -320.59                           |
| <b>8</b>  | 120.71                            | -356.94                           |
| <b>9</b>  | 81.05                             | -385.97                           |
| <b>10</b> | 77.78                             | -389.84                           |
| <b>11</b> | 110.29                            | -383.65                           |
| <b>12</b> | 173.87                            | -385.75                           |
| <b>16</b> | 316.35                            | -311.10                           |
| <b>17</b> | 329.31                            | -290.66                           |
| <b>18</b> | 262.22                            | -336.50                           |
| <b>19</b> | 223.55                            | -360.05                           |
| <b>20</b> | 235.78                            | -357.85                           |
| <b>21</b> | 371.31                            | -281.06                           |
| <b>22</b> | 355.94                            | -292.00                           |
| <b>23</b> | 304.57                            | -320.56                           |
| <b>24</b> | 386.40                            | -277.91                           |
| <b>25</b> | 272.44                            | -350.32                           |
| <b>26</b> | 267.26                            | -343.14                           |
| sarin     | 154.00                            | -373.00                           |
| soman     | 153.00                            | -375.00                           |

## Low level DFT (B3LYP/6-31G\*) modelling

Calculations were performed using low level DFT (B3LYP/6-31G\*), after energy minimisation calculations for compounds **5-26**, sarin and soman, along with complexes of **1** and compounds **5-26**, sarin and soman, in the gas phase using Spartan '16. Data from these calculations were compared to that of the semi-empirical PM6 calculations to determine which calculation method should be used for each parameter.

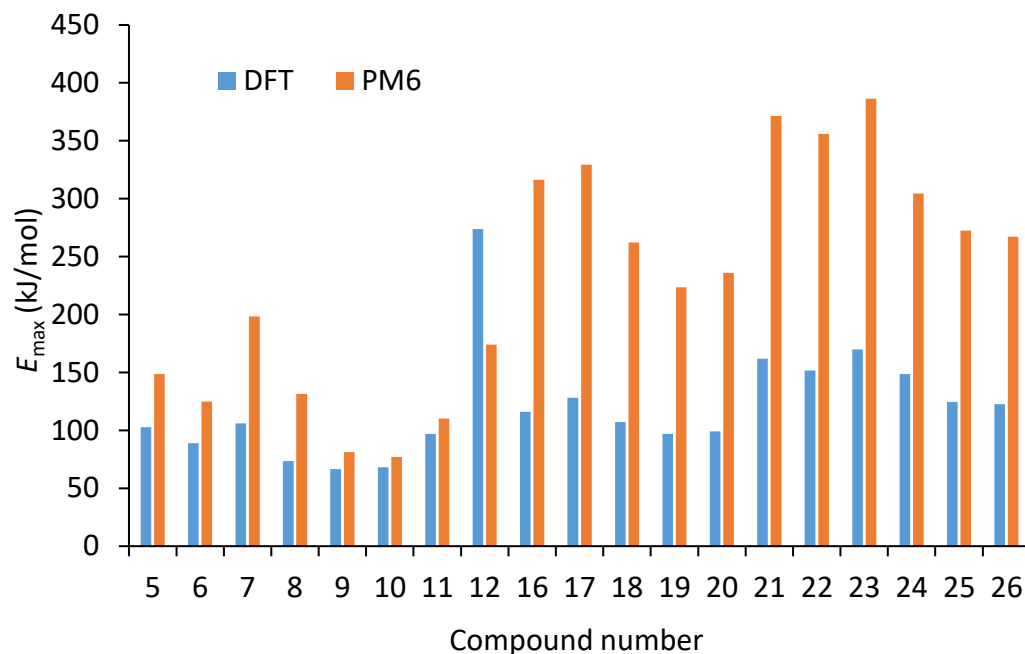

Figure S127: Comparison of data attained from DFT (B3LYP/6-31G\*) and semi-empirical PM6 modelling methods for the parameter  $E_{\max}$ .

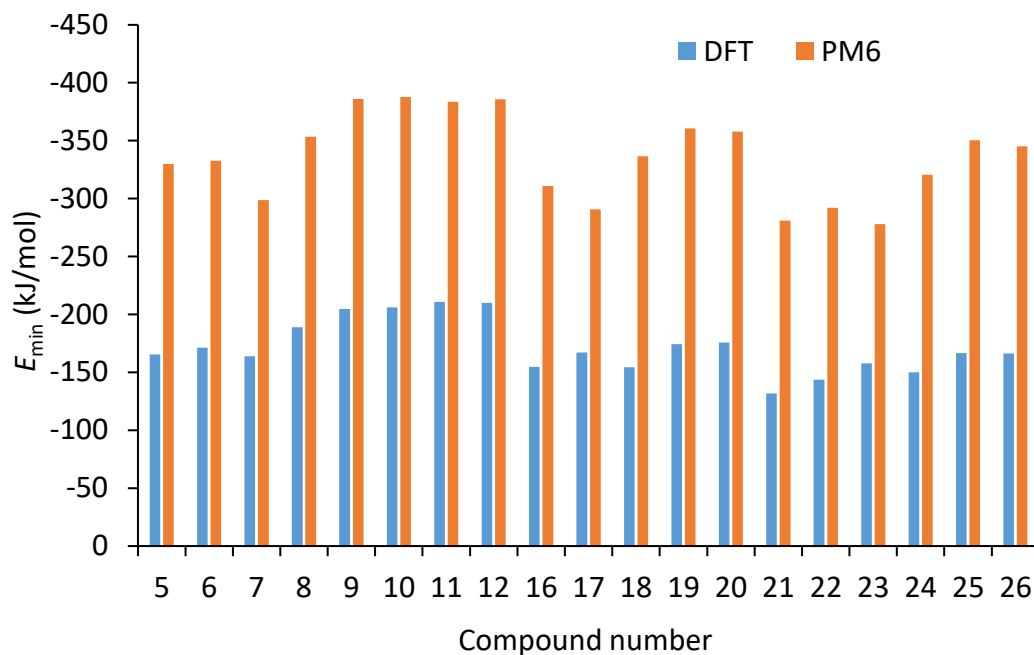

Figure S128: Comparison of data attained from DFT (B3LYP/6-31G\*) and semi-empirical PM6 modelling methods for the parameter  $E_{\min}$ .

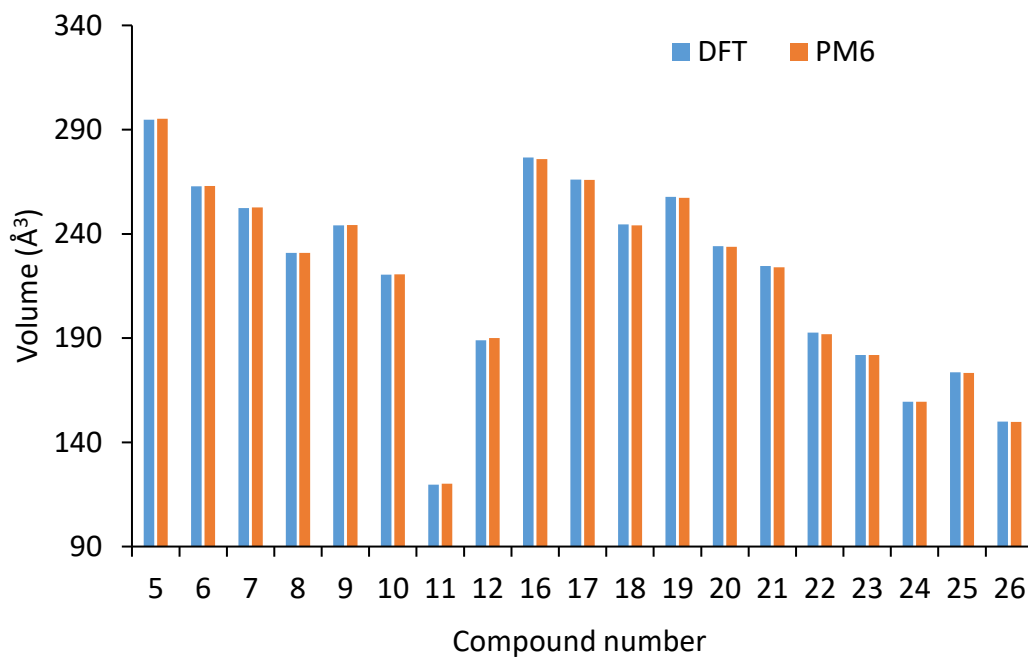

Figure S129: Comparison of data attained from DFT (B3LYP/6-31G\*) and semi-empirical PM6 modelling methods for the parameter volume.

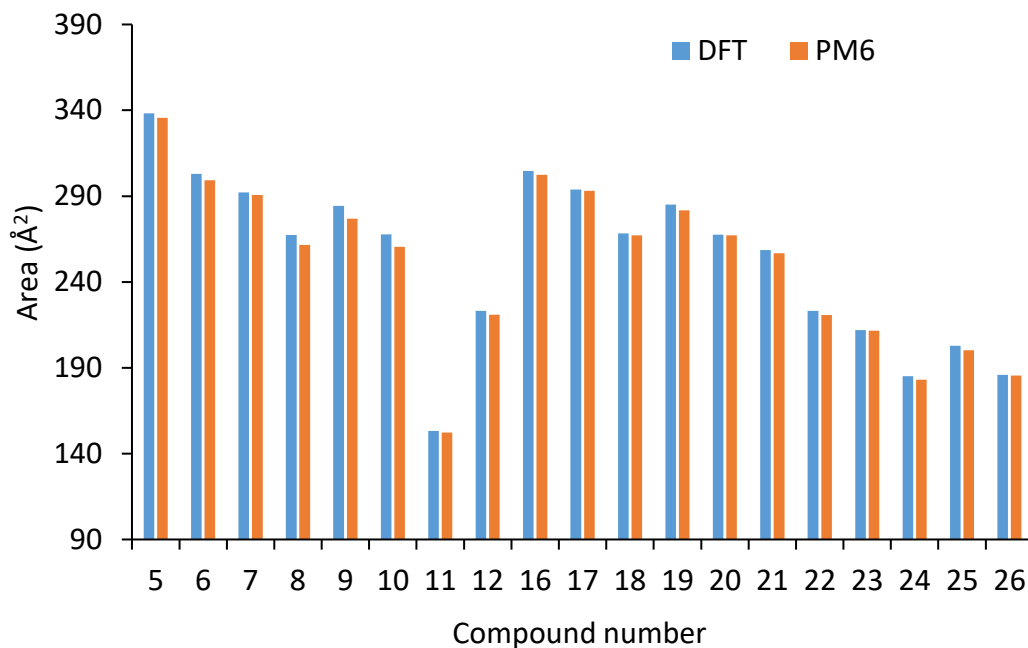

Figure S130: Comparison of data attained from DFT (B3LYP/6-31G\*) and semi-empirical PM6 modelling methods for the parameter area.

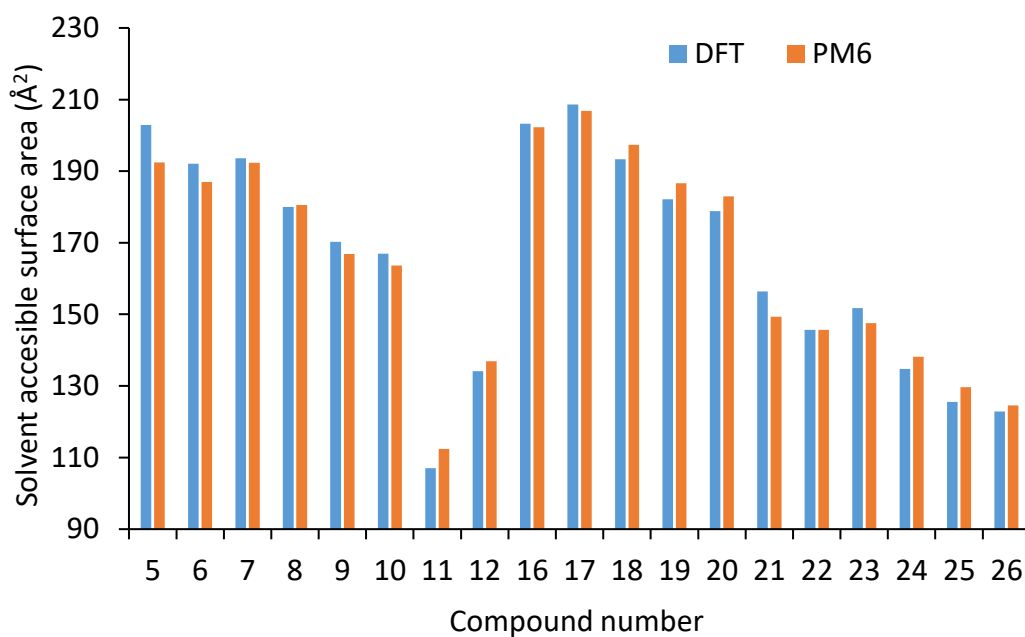

Figure S131: Comparison of data attained from DFT (B3LYP/6-31G\*) and semi-empirical PM6 modelling methods for the parameter solvent accessible surface area.



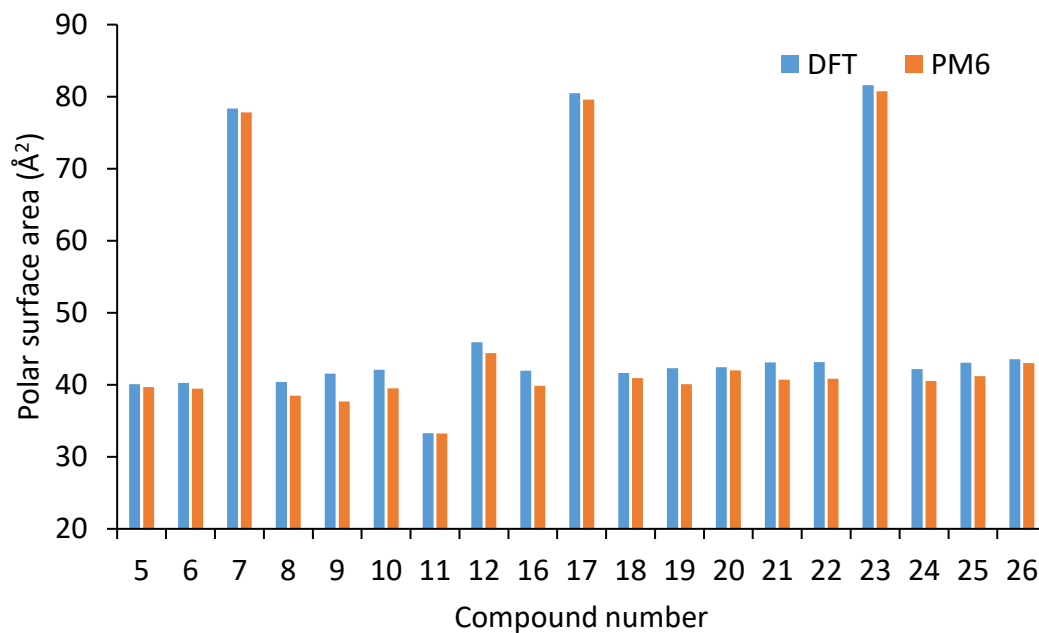

Figure S132: Comparison of data attained from DFT (B3LYP/6-31G\*) and semi-empirical PM6 modelling methods for the parameter polar surface area.

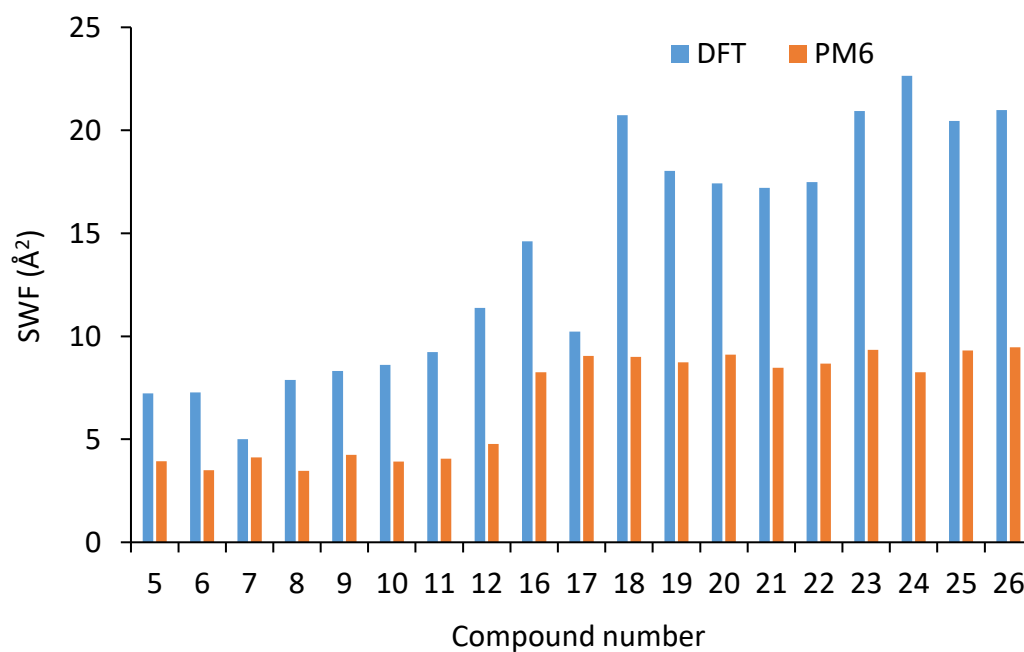

Figure S133: Comparison of data attained from DFT (B3LYP/6-31G\*) and semi-empirical PM6 modelling methods for the parameter steric weighting factor (SWF).

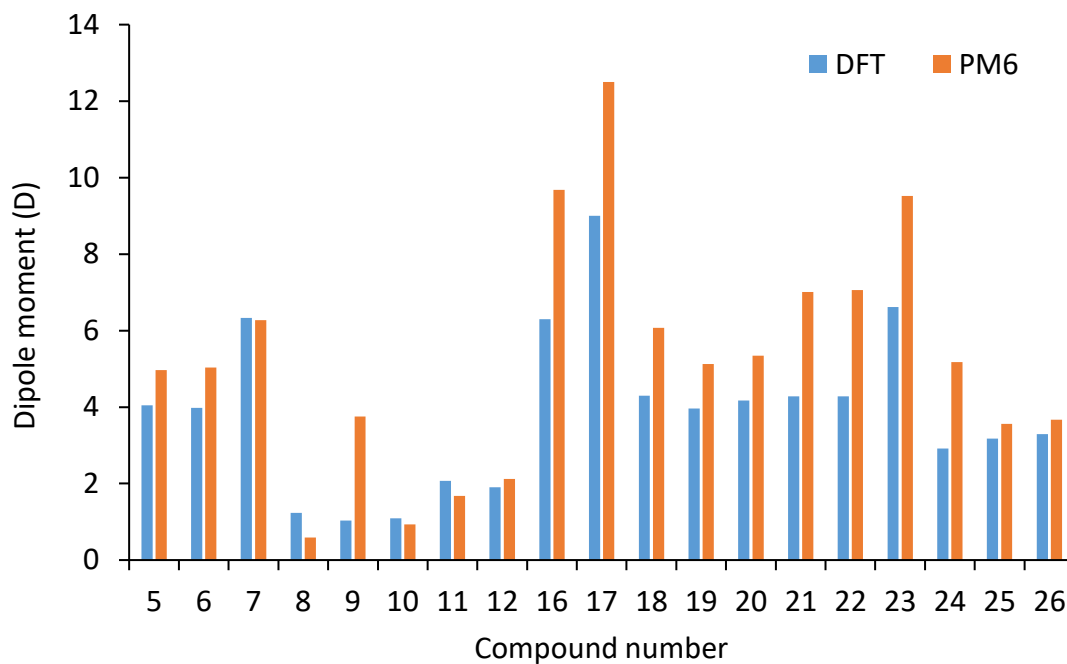

Figure S134: Comparison of data attained from DFT (B3LYP/6-31G\*) and semi-empirical PM6 modelling methods for the parameter dipole moment.

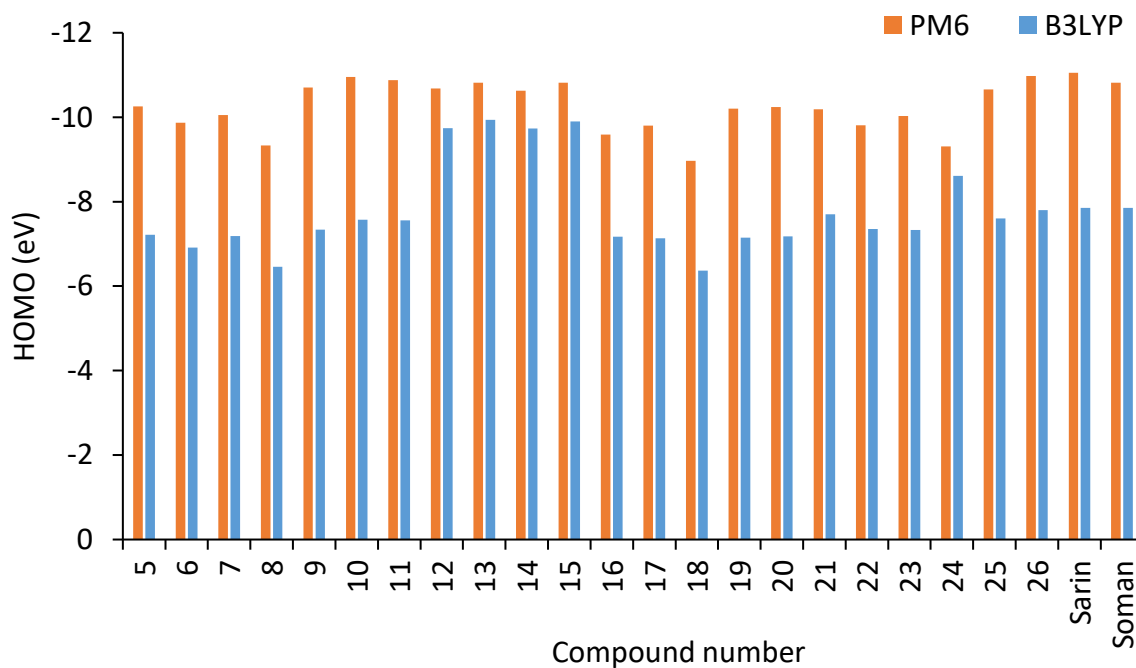

Figure S135: Comparison of data attained from DFT (B3LYP/6-31G\*) and semi-empirical PM6 modelling methods for the parameter HOMO.

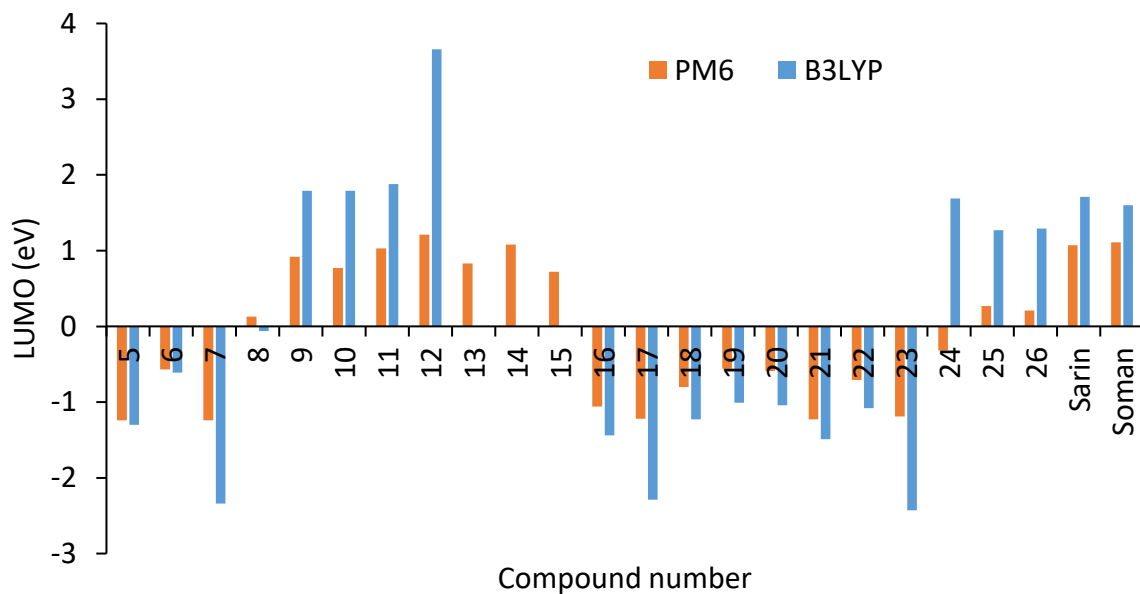

Figure S136: Comparison of data attained from DFT (B3LYP/6-31G\*) and semi-empirical PM6 modelling methods for the parameter LUMO.

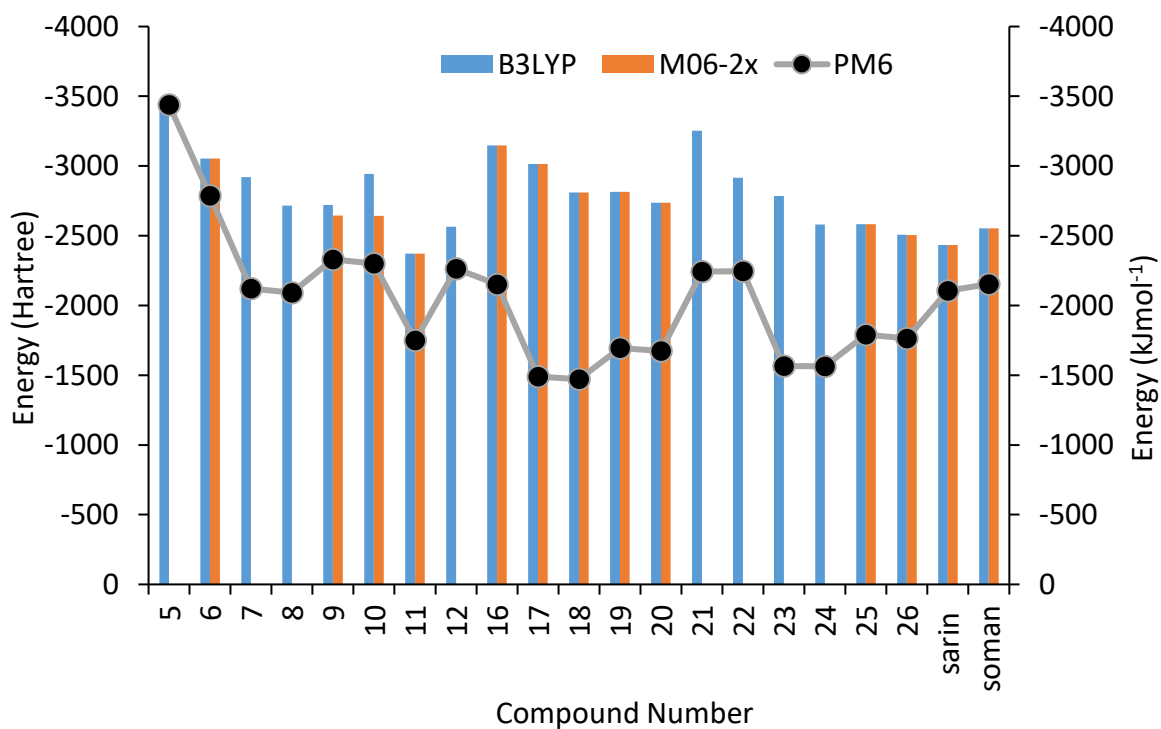

Figure S137: Comparison of data attained from DFT (B3LYP/6-31G\*), semi-empirical PM6 and DFT (M06-2X/6-311g(d,p)) modelling methods for the parameter energy.

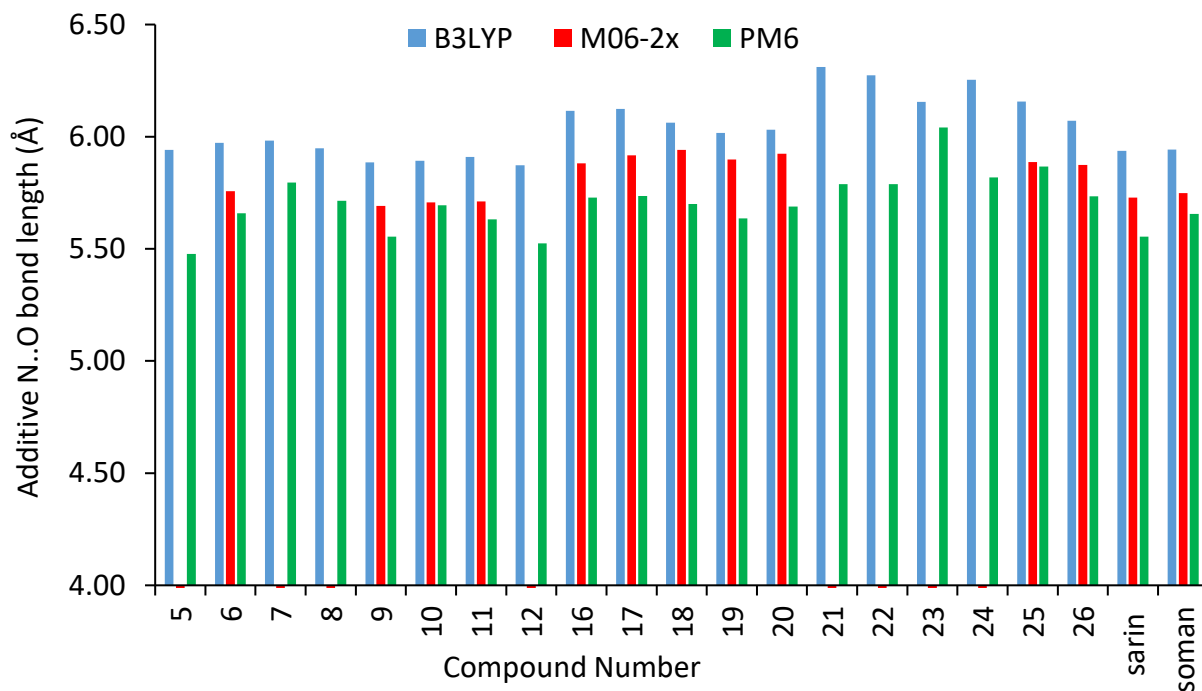

Figure S138: Comparison of data attained from DFT (B3LYP/6-31G\*), semi-empirical PM6 and DFT (M06-2X/6-311g(d,p)) modelling methods for the additive N..O bond length.

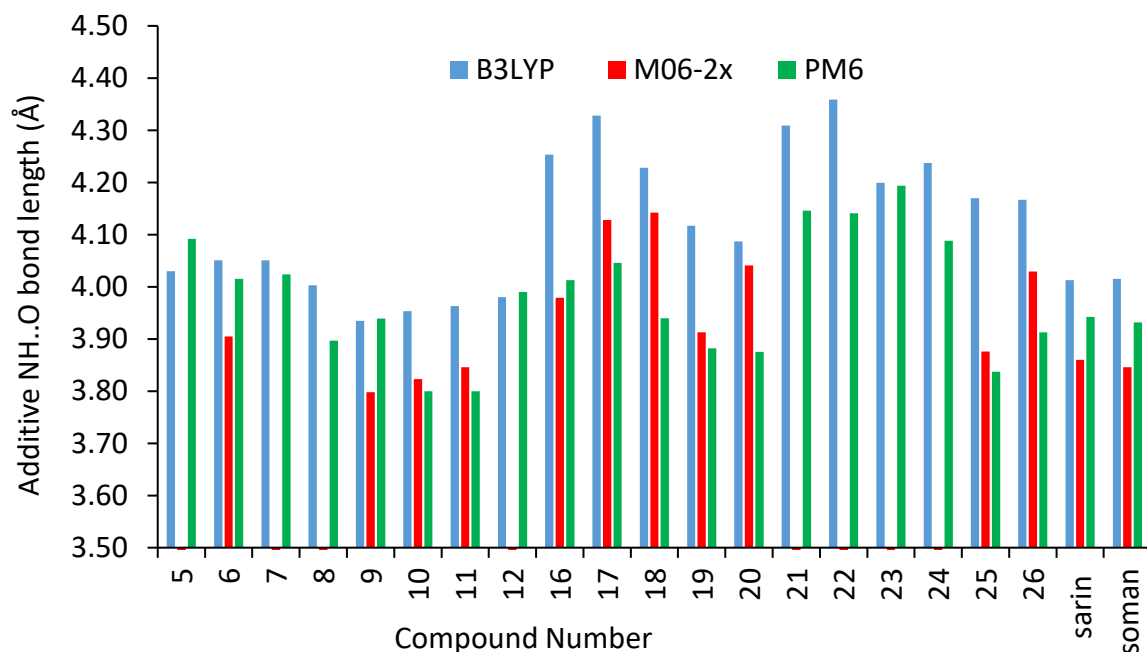

Figure S139: Comparison of data attained from DFT (B3LYP/6-31G\*), semi-empirical PM6 and DFT (M06-2X/6-311g(d,p)) modelling methods for the additive NH..O bond length.

## High-level DFT modelling

Each individual compound was pre-optimised in the gas phase at the PM6 level<sup>15</sup> using Spartan '16<sup>18</sup> before further geometry optimisation at the M06-2X level<sup>16</sup> and the 6-311g(d,p) basis set<sup>15</sup> using Gaussian16<sup>17</sup> with a PCM solvent model for acetonitrile. This functional was chosen as it is known to provide good results for main group elements and systems where hydrogen bonding is important and includes dispersion corrections to account for cumulative weak forces of interaction.<sup>18</sup> All structures were confirmed as energy minima by frequency analysis. Adducts were modelled by combining the appropriate M06-2X geometries. For each compound, initial geometries for appropriate coordination modes to **1** were chosen and allowed to freely optimise. Initial geometries for coordination via single oxygen atom (P=O or S=O), or via two oxygen atoms simultaneously (RO-P=O or O=S=O) were considered for **6**, **9**, **10**, **11**, **16-20**, **25**, **26**, sarin, soman; for **9**, the optimised geometry precluded a 2-oxygen coordination mode and so only the 1-oxygen mode was considered. Given the potential for the partial negative charge on fluorine in sarin and soman to engage in hydrogen bonding, an additional mode of association with the receptor via both the fluorine and P=O simultaneously (F-P=O association mode) was allowed to optimise for these systems. For sulfonates, stable binding modes were located utilising both S=O groups, but for all other compounds, the geometries instead converged on alternative binding modes involving only a single E=O (E = P, S) indicating that the RO-P=O or F-P=O binding modes are less favoured in these cases. In some cases, stable binding modes were located which utilised not only hydrogen bonding but also additional  $\pi$ -stacking interactions. In the images provided, dotted bonds are shown to indicate close contacts between relevant hydrogen bond donor and acceptor species; these are indicative only and should not be interpreted as inferring bond strengths.

From these results, energies of complex formation could be determined by assessing the energy change for the reaction:

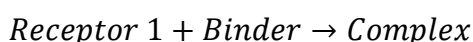

These energies are found to be broadly comparable (see Table S4) but are not suitable for evaluating binding constants as solvation effects are not fully modelled and these are known to be significant in such hydrogen-bonded arrays.

It can clearly be seen that two binding modes are anomalously stable (**6**, Mode 2) and (**17**, Mode 1), with forming complexes  $\sim 84 \text{ kJmol}^{-1}$  more stable than the free substrate and receptor, whilst the remaining structures fall in a narrow range of 49 to  $66 \text{ kJmol}^{-1}$  more stable. Notable, both the anomalously stable modes are those in which  $\pi$ -stacking is observed in addition to hydrogen-bonding interactions.

Table S4: Relative energies of binding modes compared to free species. <sup>a</sup> Mode 1 is binding through the single, primary H-bond acceptor atom. Mode 2 is bonding through two O acceptor atoms. Mode 3 is binding via fluoride. Mode 4 binding through the nitro functionality. <sup>b</sup> Oxygen except where otherwise specified <sup>c</sup> Fluorine <sup>d</sup> Sulfur.

| Guest | Mode <sup>a</sup> | Total Energy Binding / kJmol <sup>-1</sup> | NBO Charges on H-Bond Acceptors <sup>b</sup> |        |                     |        |        | Evidence of Pi Stacking |
|-------|-------------------|--------------------------------------------|----------------------------------------------|--------|---------------------|--------|--------|-------------------------|
|       |                   |                                            | 1                                            | 2      | 3                   | 4      | 5      |                         |
| sarin | 1                 | -51.2                                      | -1.107                                       | -0.876 | -0.582 <sup>c</sup> |        |        | No                      |
|       | 2                 | -56.3                                      |                                              |        |                     |        |        | No                      |
|       | 3                 | -57.9                                      |                                              |        |                     |        |        | No                      |
| soman | 1                 | -53.0                                      | -1.109                                       | -0.878 | -0.582 <sup>c</sup> |        |        | No                      |
|       | 2                 | -58.0                                      |                                              |        |                     |        |        | No                      |
|       | 3                 | -62.8                                      |                                              |        |                     |        |        | No                      |
| 6     | 1                 | -58.0                                      | -1.116                                       | -0.860 | -0.859              | -0.823 |        | No                      |
|       | 2                 | -84.6                                      |                                              |        |                     |        |        | Yes                     |
| 9     | 1                 | -67.8                                      | -1.138                                       | -0.880 | -0.866              |        |        | No                      |
| 10    | 1                 | -59.6                                      | -1.130                                       | -0.862 | -0.862              | -0.858 |        | Yes                     |
|       | 2                 | -53.7                                      |                                              |        |                     |        |        | No                      |
| 11    | 1                 | -63.0                                      | -1.127                                       | -0.860 | -0.848              |        |        | No                      |
|       | 2                 | -59.0                                      |                                              |        |                     |        |        | No                      |
| 16    | 1                 | -81.5                                      | -0.939                                       | -0.939 | -0.735              |        |        | Yes                     |
|       | 2                 | -69.2                                      |                                              |        |                     |        |        | Yes                     |
| 17    | 1                 | -74.4                                      | -0.937                                       | -0.936 | -0.734              | -0.413 | -0.413 | Yes                     |
|       | 2                 | -70.5                                      |                                              |        |                     |        |        | Yes                     |
|       | 4                 | -37.1                                      |                                              |        |                     |        |        | No                      |
| 18    | 1                 | -84.2                                      | -0.942                                       | -0.942 | -0.737              |        |        | Yes                     |
|       | 2                 | -65.8                                      |                                              |        |                     |        |        | No                      |
| 19    | 1                 | -57.8                                      | -0.962                                       | -0.961 | -0.767              |        |        | No                      |
|       | 2                 | -59.0                                      |                                              |        |                     |        |        | No                      |
| 20    | 1                 | -49.2                                      | -0.959                                       | -0.959 | -0.755              |        |        | No                      |
|       | 2                 | -52.8                                      |                                              |        |                     |        |        | Yes                     |
| 25    | 1                 | -41.1                                      | -0.962                                       | -0.961 | -0.771              |        |        | No                      |
|       | 2                 | -61.0                                      |                                              |        |                     |        |        | No                      |
| 26    | 1                 | -58.9                                      | -0.959                                       | -0.958 | -0.759              |        |        | No                      |
|       | 2                 | -55.5                                      |                                              |        |                     |        |        | No                      |

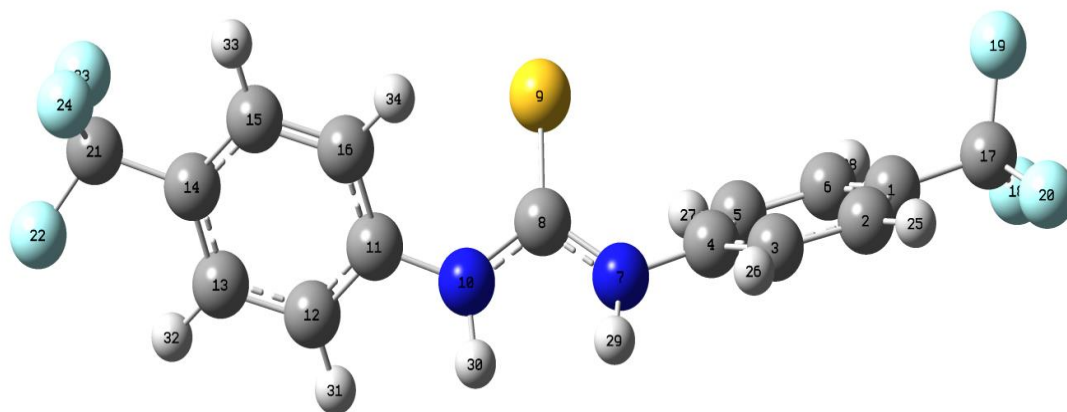

Figure S140: Output from the DFT modelling of **1** only. Total electronic energy (E(RM062X)):-1684.302146 Hartree. NBO Charges at Sulphur: S9 = -0.320 (see Table S5).

Table S5: Output from the DFT modelling of **1** only.

| Center Number | Atomic Number | Atomic Type | Coordinates (Angstroms) |           |           |
|---------------|---------------|-------------|-------------------------|-----------|-----------|
|               |               |             | X                       | Y         | Z         |
| 1             | 6             | 0           | 5.128749                | -0.064558 | -0.263283 |
| 2             | 6             | 0           | 4.691981                | 0.951323  | 0.576343  |
| 3             | 6             | 0           | 3.355510                | 1.003248  | 0.951195  |
| 4             | 6             | 0           | 2.465816                | 0.036024  | 0.491200  |
| 5             | 6             | 0           | 2.912135                | -0.995778 | -0.335707 |
| 6             | 6             | 0           | 4.241929                | -1.037866 | -0.719094 |
| 7             | 7             | 0           | 1.125497                | 0.085992  | 0.941412  |
| 8             | 6             | 0           | -0.001501               | 0.001189  | 0.183006  |
| 9             | 16            | 0           | -0.005021               | -0.033966 | -1.495251 |
| 10            | 7             | 0           | -1.126500               | -0.051586 | 0.946989  |
| 11            | 6             | 0           | -2.467001               | -0.019210 | 0.494180  |
| 12            | 6             | 0           | -3.353617               | -0.978905 | 0.974364  |
| 13            | 6             | 0           | -4.689653               | -0.940421 | 0.595378  |
| 14            | 6             | 0           | -5.127897               | 0.054210  | -0.268308 |
| 15            | 6             | 0           | -4.243537               | 1.019792  | -0.745358 |
| 16            | 6             | 0           | -2.914674               | 0.991144  | -0.358056 |
| 17            | 6             | 0           | 6.552739                | -0.104334 | -0.724534 |
| 18            | 9             | 0           | 7.023559                | -1.359179 | -0.794036 |
| 19            | 9             | 0           | 6.695877                | 0.421530  | -1.954171 |
| 20            | 9             | 0           | 7.370742                | 0.582272  | 0.084454  |
| 21            | 6             | 0           | -6.551244               | 0.080441  | -0.732746 |
| 22            | 9             | 0           | -7.366280               | -0.605705 | 0.079407  |
| 23            | 9             | 0           | -6.687816               | -0.454871 | -1.958981 |
| 24            | 9             | 0           | -7.030417               | 1.331599  | -0.812338 |
| 25            | 1             | 0           | 5.385514                | 1.700782  | 0.935156  |
| 26            | 1             | 0           | 2.999966                | 1.795882  | 1.598415  |
| 27            | 1             | 0           | 2.221377                | -1.759872 | -0.663121 |
| 28            | 1             | 0           | 4.595858                | -1.839397 | -1.355788 |
| 29            | 1             | 0           | 1.005951                | 0.380323  | 1.903055  |
| 30            | 1             | 0           | -1.006293               | -0.304772 | 1.920215  |
| 31            | 1             | 0           | -2.996476               | -1.755362 | 1.639988  |
| 32            | 1             | 0           | -5.381406               | -1.683871 | 0.969697  |
| 33            | 1             | 0           | -4.598815               | 1.804686  | -1.401773 |
| 34            | 1             | 0           | -2.225053               | 1.749216  | -0.701908 |

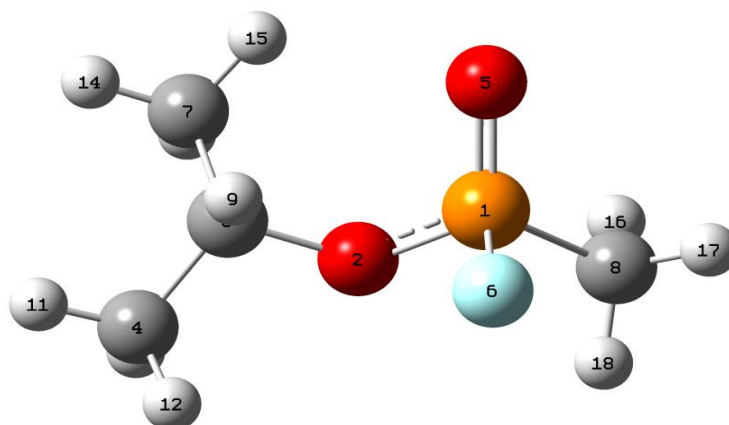

Figure S141: Output from the DFT modelling of sarin only. Total electronic energy (E(RM062X)):-750.131232 Hartree. NBO Charges at Selected Atoms: O2 = -0.876, O5 = -1.107, F6 = -0.582 (see Table S6).

Table S6: Output from the DFT modelling of sarin only.

| Center Number | Atomic Number | Atomic Type | Coordinates (Angstroms) |           |           |
|---------------|---------------|-------------|-------------------------|-----------|-----------|
|               |               |             | X                       | Y         | Z         |
| 1             | 15            | 0           | -0.812702               | 1.423205  | -0.153104 |
| 2             | 8             | 0           | 0.212000                | 0.289626  | 0.252582  |
| 3             | 6             | 0           | -0.135609               | -1.125854 | 0.105888  |
| 4             | 6             | 0           | 0.557633                | -1.848021 | 1.240314  |
| 5             | 8             | 0           | -1.593217               | 1.201822  | -1.381294 |
| 6             | 9             | 0           | -1.785124               | 1.462393  | 1.109958  |
| 7             | 6             | 0           | 0.302882                | -1.589442 | -1.268449 |
| 8             | 6             | 0           | 0.119704                | 2.926719  | 0.014925  |
| 9             | 1             | 0           | -1.220452               | -1.219594 | 0.209435  |
| 10            | 1             | 0           | 1.638665                | -1.716751 | 1.159039  |
| 11            | 1             | 0           | 0.329783                | -2.914047 | 1.192105  |
| 12            | 1             | 0           | 0.224611                | -1.459712 | 2.203119  |
| 13            | 1             | 0           | 1.380772                | -1.451470 | -1.377608 |
| 14            | 1             | 0           | 0.071016                | -2.648837 | -1.392124 |
| 15            | 1             | 0           | -0.211584               | -1.022974 | -2.044862 |
| 16            | 1             | 0           | 0.871692                | 2.964249  | -0.772254 |
| 17            | 1             | 0           | -0.554742               | 3.776097  | -0.087237 |
| 18            | 1             | 0           | 0.604672                | 2.952591  | 0.989567  |



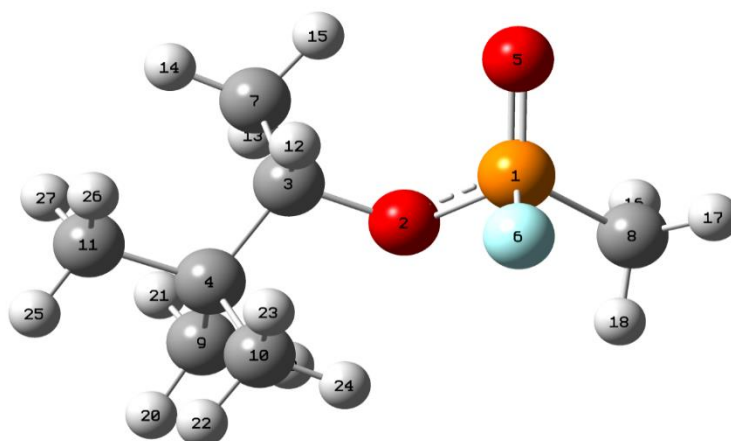

Figure S142: Output from the DFT modelling of soman only. Total electronic energy (E(RM062X)): -868.047449 Hartree. NBO Charges at Selected Atoms: O2 = -0.878, O5 = -1.109, F6 = -0.582 (see Table S7).

Table S7: Output from the DFT modelling of soman only.

| Center Number | Atomic Number | Atomic Type | Coordinates (Angstroms) |           |           |
|---------------|---------------|-------------|-------------------------|-----------|-----------|
|               |               |             | X                       | Y         | Z         |
| 1             | 15            | 0           | -0.937024               | 2.299793  | -0.270997 |
| 2             | 8             | 0           | -0.051833               | 1.003078  | -0.442576 |
| 3             | 6             | 0           | -0.631737               | -0.330935 | -0.276363 |
| 4             | 6             | 0           | 0.372704                | -1.158151 | 0.541279  |
| 5             | 8             | 0           | -2.298321               | 2.245495  | -0.829289 |
| 6             | 9             | 0           | -1.006541               | 2.459323  | 1.314264  |
| 7             | 6             | 0           | -0.981037               | -0.845973 | -1.659328 |
| 8             | 6             | 0           | 0.142925                | 3.625328  | -0.756809 |
| 9             | 6             | 0           | 1.711968                | -1.282894 | -0.191263 |
| 10            | 6             | 0           | 0.589450                | -0.462872 | 1.890770  |
| 11            | 6             | 0           | -0.220636               | -2.550671 | 0.785799  |
| 12            | 1             | 0           | -1.547221               | -0.230529 | 0.318047  |
| 13            | 1             | 0           | -0.090751               | -0.898929 | -2.287717 |
| 14            | 1             | 0           | -1.435817               | -1.835238 | -1.600839 |
| 15            | 1             | 0           | -1.696637               | -0.166426 | -2.123913 |
| 16            | 1             | 0           | 0.314932                | 3.562784  | -1.830647 |
| 17            | 1             | 0           | -0.332178               | 4.576587  | -0.519834 |
| 18            | 1             | 0           | 1.090325                | 3.541219  | -0.226283 |
| 19            | 1             | 0           | 2.118313                | -0.297638 | -0.429517 |
| 20            | 1             | 0           | 2.430783                | -1.804555 | 0.445546  |
| 21            | 1             | 0           | 1.613961                | -1.853324 | -1.117632 |
| 22            | 1             | 0           | 1.248741                | -1.065520 | 2.519891  |
| 23            | 1             | 0           | -0.359741               | -0.332126 | 2.419185  |
| 24            | 1             | 0           | 1.045394                | 0.519736  | 1.758176  |
| 25            | 1             | 0           | 0.429399                | -3.110749 | 1.462111  |
| 26            | 1             | 0           | -1.210153               | -2.484124 | 1.247854  |
| 27            | 1             | 0           | -0.309269               | -3.122690 | -0.139915 |

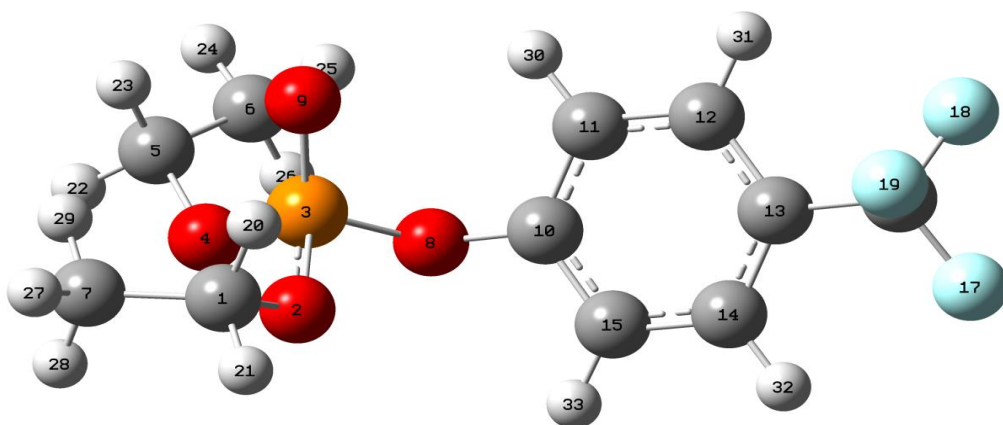

Figure S143: Output from the DFT modelling of **6** only. Total electronic energy (E(RM062X)):-1369.376406 Hartree. NBO Charges at Selected Atoms: O2 = -0.859, O4 = -0.860, O8 = -0.823, O9 = -1.116 (see Table S8).

Table S8: Output from the DFT modelling of **6** only.

| Center Number | Atomic Number | Atomic Type | Coordinates (Angstroms) |           |           |
|---------------|---------------|-------------|-------------------------|-----------|-----------|
|               |               |             | X                       | Y         | Z         |
| 1             | 6             | 0           | 2.234140                | 2.285560  | 0.273295  |
| 2             | 8             | 0           | 1.049410                | 1.730069  | -0.357797 |
| 3             | 15            | 0           | 1.047475                | 0.235577  | -0.870934 |
| 4             | 8             | 0           | 1.415444                | 0.335459  | -2.403231 |
| 5             | 6             | 0           | 1.973992                | -0.809758 | -3.101535 |
| 6             | 6             | 0           | 0.943151                | -1.903123 | -3.283630 |
| 7             | 6             | 0           | 3.365974                | 2.449186  | -0.718692 |
| 8             | 8             | 0           | -0.529389               | -0.073761 | -0.944153 |
| 9             | 8             | 0           | 1.844606                | -0.719439 | -0.082062 |
| 10            | 6             | 0           | -1.273206               | -0.252981 | 0.213422  |
| 11            | 6             | 0           | -1.068773               | -1.377741 | 1.003843  |
| 12            | 6             | 0           | -1.861110               | -1.556117 | 2.128159  |
| 13            | 6             | 0           | -2.840946               | -0.617756 | 2.441023  |
| 14            | 6             | 0           | -3.035362               | 0.503362  | 1.641980  |
| 15            | 6             | 0           | -2.243817               | 0.690030  | 0.516365  |
| 16            | 6             | 0           | -3.656187               | -0.806566 | 3.683576  |
| 17            | 9             | 0           | -4.804035               | -0.116898 | 3.649700  |
| 18            | 9             | 0           | -3.971659               | -2.094816 | 3.886174  |
| 19            | 9             | 0           | -2.994752               | -0.401566 | 4.782218  |
| 20            | 1             | 0           | 2.515504                | 1.634177  | 1.101710  |
| 21            | 1             | 0           | 1.904119                | 3.243741  | 0.667457  |
| 22            | 1             | 0           | 2.305797                | -0.406866 | -4.055459 |
| 23            | 1             | 0           | 2.840015                | -1.162978 | -2.540096 |
| 24            | 1             | 0           | 1.370145                | -2.705178 | -3.887762 |
| 25            | 1             | 0           | 0.642895                | -2.324481 | -2.321902 |
| 26            | 1             | 0           | 0.059118                | -1.514673 | -3.790872 |
| 27            | 1             | 0           | 4.200037                | 2.958557  | -0.233527 |
| 28            | 1             | 0           | 3.041841                | 3.043278  | -1.574031 |
| 29            | 1             | 0           | 3.721869                | 1.480256  | -1.075589 |
| 30            | 1             | 0           | -0.300093               | -2.090227 | 0.735021  |
| 31            | 1             | 0           | -1.723783               | -2.429103 | 2.754295  |
| 32            | 1             | 0           | -3.802102               | 1.225189  | 1.891860  |
| 33            | 1             | 0           | -2.370326               | 1.549586  | -0.128825 |

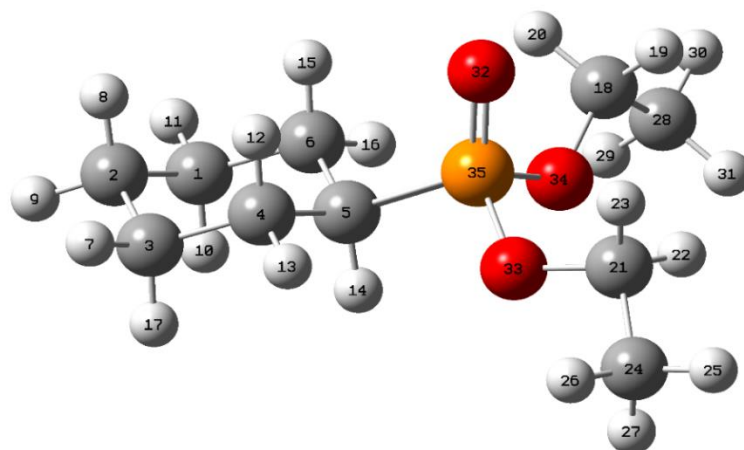

Figure S144: Output from the DFT modelling of **9** only. Total electronic energy (E(RM062X)):- -960.715367 Hartree. NBO Charges at Oxygen: O32 = -1.138, O33 = -0.866, O34 = -0.880 (see Table S9).

Table S9: Output from the DFT modelling of **9** only.

| Center Number | Atomic Number | Atomic Type | Coordinates (Angstroms) |           |           |
|---------------|---------------|-------------|-------------------------|-----------|-----------|
|               |               |             | X                       | Y         | Z         |
| 1             | 6             | 0           | -1.878251               | -2.491138 | -0.487328 |
| 2             | 6             | 0           | -0.370967               | -2.746561 | -0.544167 |
| 3             | 6             | 0           | 0.410302                | -1.432649 | -0.484041 |
| 4             | 6             | 0           | 0.047290                | -0.630391 | 0.767886  |
| 5             | 6             | 0           | -1.467630               | -0.378378 | 0.830317  |
| 6             | 6             | 0           | -2.259563               | -1.695391 | 0.763337  |
| 7             | 1             | 0           | 1.485448                | -1.626808 | -0.496512 |
| 8             | 1             | 0           | -0.080622               | -3.376555 | 0.304932  |
| 9             | 1             | 0           | -0.115947               | -3.296497 | -1.453290 |
| 10            | 1             | 0           | -2.183207               | -1.926776 | -1.376129 |
| 11            | 1             | 0           | -2.427085               | -3.435710 | -0.502474 |
| 12            | 1             | 0           | 0.347627                | -1.191654 | 1.659960  |
| 13            | 1             | 0           | 0.585639                | 0.320373  | 0.783992  |
| 14            | 1             | 0           | -1.765995               | 0.261337  | -0.008921 |
| 15            | 1             | 0           | -2.036761               | -2.293011 | 1.655453  |
| 16            | 1             | 0           | -3.333112               | -1.486933 | 0.766408  |
| 17            | 1             | 0           | 0.180825                | -0.834097 | -1.373224 |
| 18            | 6             | 0           | -4.409000               | 0.107936  | 3.118699  |
| 19            | 1             | 0           | -4.248951               | 0.480540  | 4.131720  |
| 20            | 1             | 0           | -4.200318               | -0.964649 | 3.108727  |
| 21            | 6             | 0           | -1.501563               | 3.028402  | 3.005099  |
| 22            | 1             | 0           | -2.573947               | 3.137535  | 3.186335  |
| 23            | 1             | 0           | -1.012939               | 2.734732  | 3.936365  |
| 24            | 6             | 0           | -0.905984               | 4.296825  | 2.441452  |
| 25            | 1             | 0           | -1.035297               | 5.113622  | 3.153143  |
| 26            | 1             | 0           | 0.160115                | 4.164660  | 2.252485  |
| 27            | 1             | 0           | -1.399535               | 4.566344  | 1.506955  |
| 28            | 6             | 0           | -5.809202               | 0.398510  | 2.631812  |
| 29            | 1             | 0           | -5.946105               | 0.019526  | 1.617869  |
| 30            | 1             | 0           | -6.536002               | -0.084488 | 3.286826  |
| 31            | 1             | 0           | -5.997500               | 1.473020  | 2.634150  |
| 32            | 8             | 0           | -1.496159               | -0.088926 | 3.609548  |
| 33            | 8             | 0           | -1.306675               | 1.979233  | 2.030108  |
| 34            | 8             | 0           | -3.492522               | 0.781809  | 2.228451  |
| 35            | 15            | 0           | -1.906836               | 0.525559  | 2.321321  |

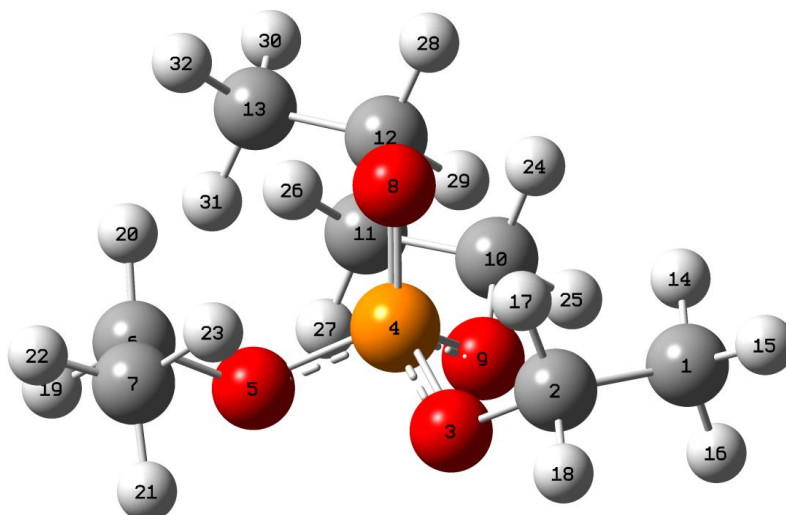

Figure S145: Output from the DFT modelling of **10** only. Total electronic energy (E(RM062X)): -958.536196 Hartree. NBO Charges at Selected Atoms: O3 = -0.862, O5 = -0.862, O8 = -1.130, O9 = -0.858 (see Table S10).

Table S10: Output from the DFT modelling of **10** only.

| Center Number | Atomic Number | Atomic Type | Coordinates (Angstroms) |           |           |
|---------------|---------------|-------------|-------------------------|-----------|-----------|
|               |               |             | X                       | Y         | Z         |
| 1             | 6             | 0           | -1.160942               | 3.370078  | 1.527378  |
| 2             | 6             | 0           | -0.969550               | 3.435646  | 0.026156  |
| 3             | 8             | 0           | -1.256444               | 2.166352  | -0.611048 |
| 4             | 15            | 0           | -0.310149               | 0.917993  | -0.355421 |
| 5             | 8             | 0           | -0.613960               | -0.020894 | -1.598343 |
| 6             | 6             | 0           | 0.222478                | 0.046829  | -2.779573 |
| 7             | 6             | 0           | 0.071349                | 1.368861  | -3.503495 |
| 8             | 8             | 0           | 1.115028                | 1.240328  | -0.139128 |
| 9             | 8             | 0           | -1.026762               | 0.166220  | 0.844959  |
| 10            | 6             | 0           | -0.273992               | -0.747337 | 1.677782  |
| 11            | 6             | 0           | 0.163673                | -1.989392 | 0.924257  |
| 12            | 6             | 0           | 0.837946                | -2.993480 | 1.857773  |
| 13            | 6             | 0           | 1.302385                | -4.243484 | 1.114631  |
| 14            | 1             | 0           | -0.426253               | 2.707744  | 1.989839  |
| 15            | 1             | 0           | -1.034358               | 4.367636  | 1.951227  |
| 16            | 1             | 0           | -2.161689               | 3.010276  | 1.769984  |
| 17            | 1             | 0           | 0.049973                | 3.726415  | -0.233187 |
| 18            | 1             | 0           | -1.665848               | 4.133593  | -0.433618 |
| 19            | 1             | 0           | -0.111075               | -0.784976 | -3.396138 |
| 20            | 1             | 0           | 1.256857                | -0.126028 | -2.477359 |
| 21            | 1             | 0           | -0.977025               | 1.560058  | -3.736210 |
| 22            | 1             | 0           | 0.637662                | 1.336876  | -4.435712 |
| 23            | 1             | 0           | 0.454938                | 2.194118  | -2.900045 |
| 24            | 1             | 0           | 0.587312                | -0.213674 | 2.086983  |
| 25            | 1             | 0           | -0.952672               | -1.001929 | 2.490817  |
| 26            | 1             | 0           | 0.860240                | -1.708104 | 0.126647  |
| 27            | 1             | 0           | -0.710313               | -2.444519 | 0.447991  |
| 28            | 1             | 0           | 1.693124                | -2.516079 | 2.346904  |
| 29            | 1             | 0           | 0.138693                | -3.274111 | 2.651845  |
| 30            | 1             | 0           | 1.780325                | -4.953234 | 1.791929  |
| 31            | 1             | 0           | 0.457385                | -4.746935 | 0.638525  |
| 32            | 1             | 0           | 2.021648                | -3.984845 | 0.333649  |

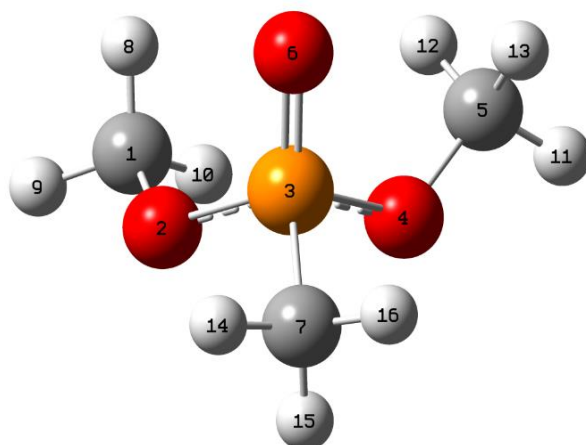

Figure S146: Output from the DFT modelling of **11** only. Total electronic energy (E(RM062X)): -686.773578 Hartree. NBO Charges at Selected Atoms: O2 = -0.848, O4 = -0.860, O6 = -1.127 (see Table S11).

Table S11: Output from the DFT modelling of **11** only.

| Center Number | Atomic Number | Atomic Type | Coordinates (Angstroms) |           |           |
|---------------|---------------|-------------|-------------------------|-----------|-----------|
|               |               |             | X                       | Y         | Z         |
| 1             | 6             | 0           | -0.966108               | 1.997798  | -0.139257 |
| 2             | 8             | 0           | -0.478245               | 1.136913  | 0.901082  |
| 3             | 15            | 0           | 0.518119                | -0.054042 | 0.506522  |
| 4             | 8             | 0           | -0.346257               | -0.959794 | -0.499608 |
| 5             | 6             | 0           | 0.040439                | -1.114483 | -1.874229 |
| 6             | 8             | 0           | 1.809250                | 0.379859  | -0.078066 |
| 7             | 6             | 0           | 0.572405                | -0.994906 | 2.020513  |
| 8             | 1             | 0           | -0.134242               | 2.429399  | -0.698228 |
| 9             | 1             | 0           | -1.531502               | 2.787952  | 0.346505  |
| 10            | 1             | 0           | -1.618214               | 1.434456  | -0.809136 |
| 11            | 1             | 0           | -0.581280               | -1.908934 | -2.278393 |
| 12            | 1             | 0           | -0.137857               | -0.190086 | -2.425298 |
| 13            | 1             | 0           | 1.092931                | -1.385595 | -1.947074 |
| 14            | 1             | 0           | 1.000153                | -0.381147 | 2.812503  |
| 15            | 1             | 0           | -0.435170               | -1.302496 | 2.296963  |
| 16            | 1             | 0           | 1.195577                | -1.874894 | 1.865203  |

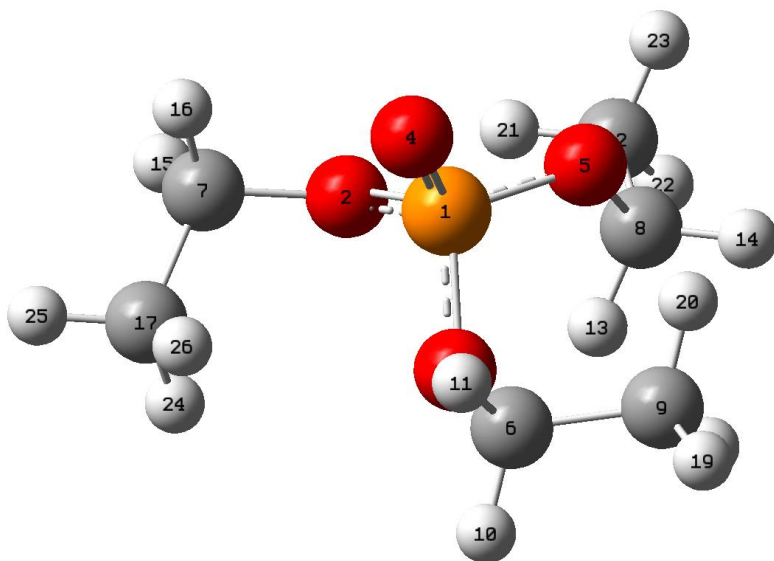

Figure S147: Output from the DFT modelling of **13** only.

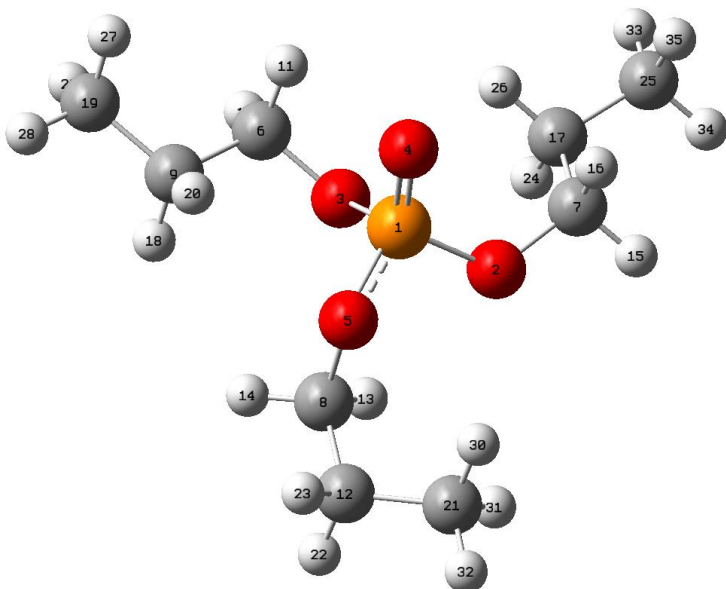

Figure S148: Output from the DFT modelling of **14** only.

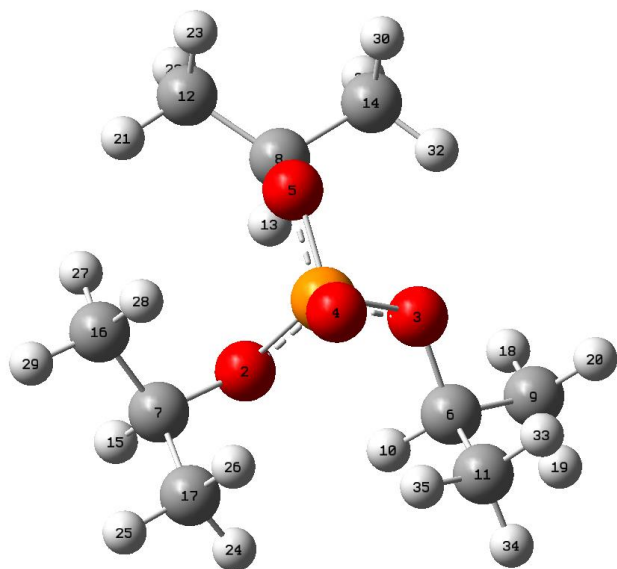

Figure S149: Output from the DFT modelling of **15** only.

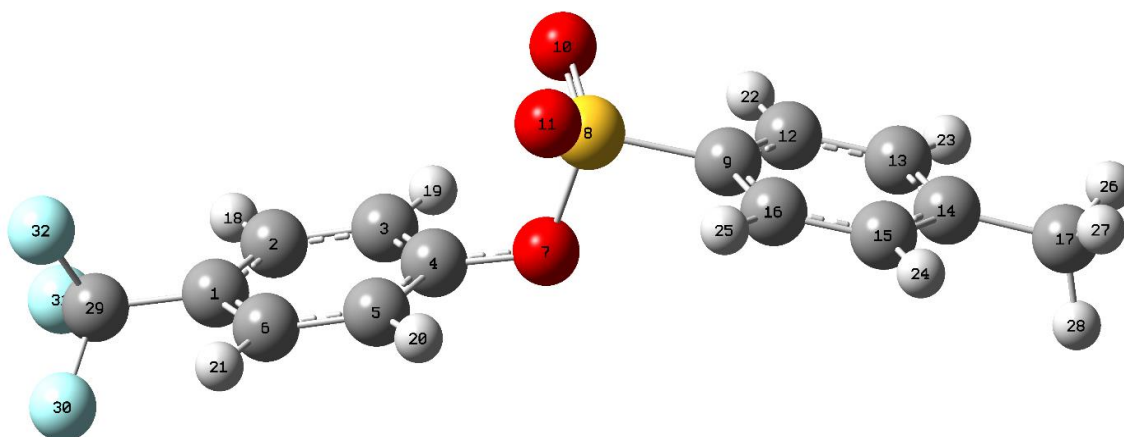

Figure S150: Output from the DFT modelling of **16** only. Total electronic energy (E(RM062X)): -1463.337306 Hartree. NBO Charges at Oxygen: O7 = -0.735, O10 = -0.939, O11 = -0.939 (see Table S12).

Table S12: Output from the DFT modelling of **16** only.

| Center Number | Atomic Number | Atomic Type | Coordinates (Angstroms) |           |           |
|---------------|---------------|-------------|-------------------------|-----------|-----------|
|               |               |             | X                       | Y         | Z         |
| 1             | 6             | 0           | 0.386498                | 0.120093  | 5.251510  |
| 2             | 6             | 0           | 1.111040                | -0.840967 | 4.556164  |
| 3             | 6             | 0           | 1.069173                | -0.859171 | 3.167514  |
| 4             | 6             | 0           | 0.299080                | 0.089258  | 2.512622  |
| 5             | 6             | 0           | -0.432662               | 1.052210  | 3.193992  |
| 6             | 6             | 0           | -0.384499               | 1.065764  | 4.579798  |
| 7             | 8             | 0           | 0.292163                | 0.107880  | 1.116117  |
| 8             | 16            | 0           | -0.832149               | -0.838333 | 0.388067  |
| 9             | 6             | 0           | -0.456595               | -0.431445 | -1.279041 |
| 10            | 8             | 0           | -0.496829               | -2.215771 | 0.670903  |
| 11            | 8             | 0           | -2.135144               | -0.336138 | 0.762016  |
| 12            | 6             | 0           | 0.489071                | -1.190037 | -1.958586 |
| 13            | 6             | 0           | 0.786887                | -0.850704 | -3.270523 |
| 14            | 6             | 0           | 0.159278                | 0.230509  | -3.895301 |
| 15            | 6             | 0           | -0.788197               | 0.969918  | -3.179910 |
| 16            | 6             | 0           | -1.102388               | 0.650281  | -1.867883 |
| 17            | 6             | 0           | 0.510328                | 0.608726  | -5.307884 |
| 18            | 1             | 0           | 1.709696                | -1.566455 | 5.091063  |
| 19            | 1             | 0           | 1.624643                | -1.589060 | 2.593499  |
| 20            | 1             | 0           | -1.016995               | 1.773936  | 2.638557  |
| 21            | 1             | 0           | -0.937609               | 1.812678  | 5.135770  |
| 22            | 1             | 0           | 0.967280                | -2.032471 | -1.474798 |
| 23            | 1             | 0           | 1.514900                | -1.436584 | -3.819241 |
| 24            | 1             | 0           | -1.288032               | 1.803818  | -3.658881 |
| 25            | 1             | 0           | -1.841983               | 1.215308  | -1.314481 |
| 26            | 1             | 0           | 0.907533                | -0.244748 | -5.857023 |
| 27            | 1             | 0           | -0.360494               | 0.995824  | -5.837744 |
| 28            | 1             | 0           | 1.273291                | 1.391833  | -5.305928 |
| 29            | 6             | 0           | 0.389994                | 0.131469  | 6.751006  |
| 30            | 9             | 0           | 0.473026                | 1.377896  | 7.240160  |
| 31            | 9             | 0           | 1.410278                | -0.566446 | 7.264572  |
| 32            | 9             | 0           | -0.737368               | -0.399071 | 7.254338  |



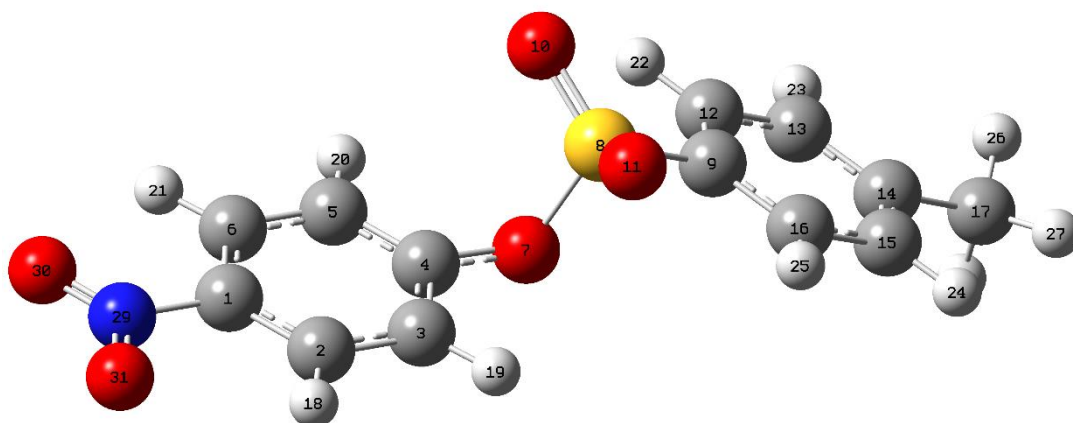

Figure S151: Output from the DFT modelling of **17** only. Total electronic energy (E(RM062X)): -1330.778537 Hartree. NBO Charges at Oxygen: O7 = -0.734, O10 = -0.937, O11 = -0.936, O30 = -0.413, O31 = -0.413 (see Table S13).

Table S13: Output from the DFT modelling of **17** only.

| Center Number | Atomic Number | Atomic Type | Coordinates (Angstroms) |           |           |
|---------------|---------------|-------------|-------------------------|-----------|-----------|
|               |               |             | X                       | Y         | Z         |
| 1             | 6             | 0           | 0.421888                | -0.144978 | 5.224473  |
| 2             | 6             | 0           | 1.051730                | 0.889088  | 4.547061  |
| 3             | 6             | 0           | 0.988616                | 0.905417  | 3.162070  |
| 4             | 6             | 0           | 0.303728                | -0.112144 | 2.510952  |
| 5             | 6             | 0           | -0.327324               | -1.143347 | 3.194543  |
| 6             | 6             | 0           | -0.266726               | -1.162277 | 4.579559  |
| 7             | 8             | 0           | 0.282943                | -0.118859 | 1.119015  |
| 8             | 16            | 0           | -0.988659               | 0.647612  | 0.411669  |
| 9             | 6             | 0           | -0.556567               | 0.350953  | -1.263755 |
| 10            | 8             | 0           | -2.185947               | -0.075739 | 0.774468  |
| 11            | 8             | 0           | -0.882016               | 2.052030  | 0.734340  |
| 12            | 6             | 0           | -1.007583               | -0.813317 | -1.876586 |
| 13            | 6             | 0           | -0.651954               | -1.041583 | -3.196812 |
| 14            | 6             | 0           | 0.145363                | -0.130247 | -3.897007 |
| 15            | 6             | 0           | 0.578986                | 1.028985  | -3.247887 |
| 16            | 6             | 0           | 0.236684                | 1.279617  | -1.926896 |
| 17            | 6             | 0           | 0.544599                | -0.407372 | -5.320067 |
| 18            | 1             | 0           | 1.576242                | 1.657732  | 5.096306  |
| 19            | 1             | 0           | 1.463190                | 1.687482  | 2.584657  |
| 20            | 1             | 0           | -0.850259               | -1.912357 | 2.641928  |
| 21            | 1             | 0           | -0.740103               | -1.945898 | 5.153532  |
| 22            | 1             | 0           | -1.632598               | -1.512231 | -1.334981 |
| 23            | 1             | 0           | -1.001560               | -1.938491 | -3.694684 |
| 24            | 1             | 0           | 1.188565                | 1.746440  | -3.784509 |
| 25            | 1             | 0           | 0.563620                | 2.181146  | -1.424105 |
| 26            | 1             | 0           | -0.256300               | -0.913481 | -5.859947 |
| 27            | 1             | 0           | 0.797583                | 0.513631  | -5.844815 |
| 28            | 1             | 0           | 1.422359                | -1.058863 | -5.341159 |
| 29            | 7             | 0           | 0.488562                | -0.164648 | 6.697019  |
| 30            | 8             | 0           | -0.064977               | -1.074587 | 7.275670  |
| 31            | 8             | 0           | 1.093034                | 0.730287  | 7.247437  |

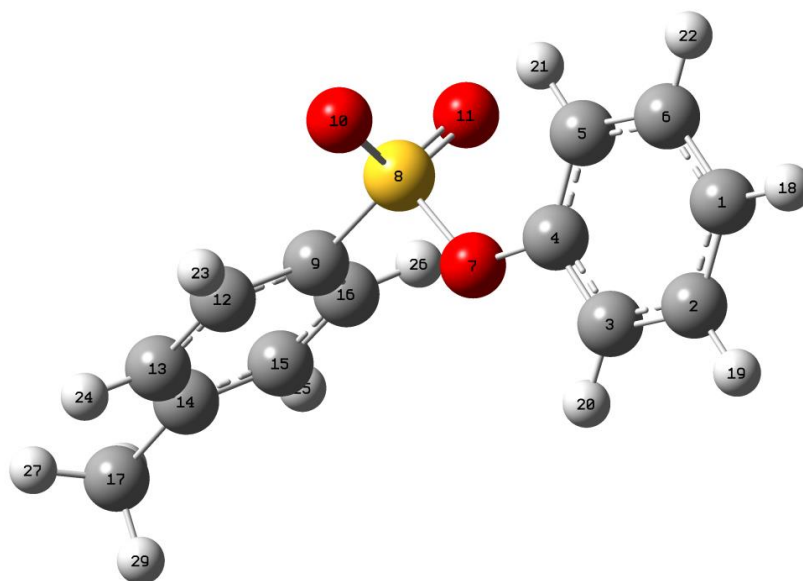

Figure S152: Output from the DFT modelling of **18** only. Total electronic energy (E(RM062X)): -1126.290819 Hartree. NBO Charges at Selected Atoms: O7 = -0.737, O10 = -0.942, O11 = -0.942 (see Table S14).

Table S14: Output from the DFT modelling of **18** only.

| Center Number | Atomic Number | Atomic Type | Coordinates (Angstroms) |           |           |
|---------------|---------------|-------------|-------------------------|-----------|-----------|
|               |               |             | X                       | Y         | Z         |
| 1             | 6             | 0           | 0.546570                | -0.000000 | 5.259903  |
| 2             | 6             | 0           | 1.636621                | -0.000000 | 4.393108  |
| 3             | 6             | 0           | 1.439276                | -0.000000 | 3.019022  |
| 4             | 6             | 0           | 0.142336                | 0.000000  | 2.521959  |
| 5             | 6             | 0           | -0.960858               | 0.000000  | 3.365581  |
| 6             | 6             | 0           | -0.742337               | 0.000000  | 4.741550  |
| 7             | 8             | 0           | 0.063395                | 0.000000  | 1.125332  |
| 8             | 16            | 0           | -1.364887               | 0.000000  | 0.346196  |
| 9             | 6             | 0           | -0.740755               | 0.000000  | -1.297106 |
| 10            | 8             | 0           | -2.034861               | -1.248032 | 0.637028  |
| 11            | 8             | 0           | -2.034861               | 1.248032  | 0.637028  |
| 12            | 6             | 0           | -0.497870               | -1.217178 | -1.923080 |
| 13            | 6             | 0           | 0.000079                | -1.204557 | -3.217614 |
| 14            | 6             | 0           | 0.259288                | -0.000000 | -3.878239 |
| 15            | 6             | 0           | 0.000079                | 1.204557  | -3.217614 |
| 16            | 6             | 0           | -0.497870               | 1.217178  | -1.923080 |
| 17            | 6             | 0           | 0.828005                | -0.000000 | -5.270453 |
| 18            | 1             | 0           | 0.702116                | -0.000000 | 6.331241  |
| 19            | 1             | 0           | 2.646259                | -0.000000 | 4.784916  |
| 20            | 1             | 0           | 2.269224                | -0.000000 | 2.324013  |
| 21            | 1             | 0           | -1.971070               | 0.000000  | 2.979763  |
| 22            | 1             | 0           | -1.596931               | 0.000000  | 5.406748  |
| 23            | 1             | 0           | -0.708963               | -2.148197 | -1.411993 |
| 24            | 1             | 0           | 0.186683                | -2.143695 | -3.725288 |
| 25            | 1             | 0           | 0.186683                | 2.143695  | -3.725288 |
| 26            | 1             | 0           | -0.708963               | 2.148197  | -1.411993 |
| 27            | 1             | 0           | 0.516539                | -0.887085 | -5.822174 |
| 28            | 1             | 0           | 0.516539                | 0.887085  | -5.822174 |
| 29            | 1             | 0           | 1.920534                | 0.000000  | -5.227292 |

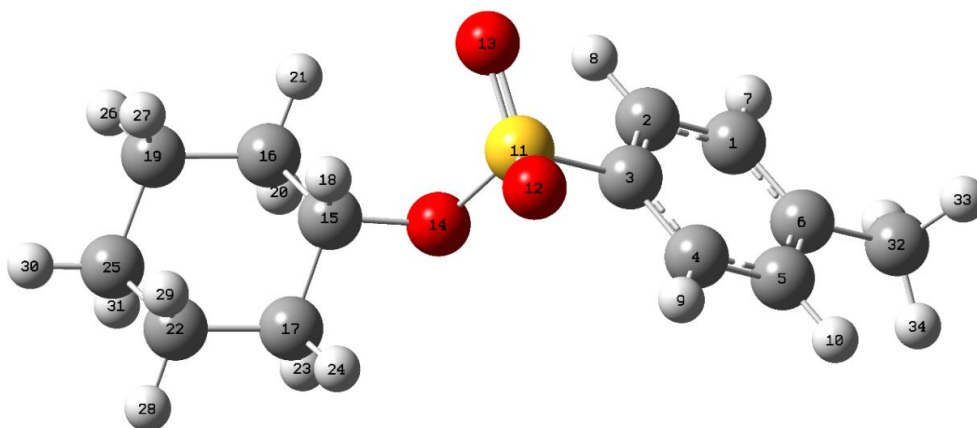

Figure S153: Output from the DFT modelling of **19** only. Total electronic energy (E(RM062X)): -1129.918714 Hartree. NBO Charges at Oxygen: O12 = -0.961, O13 = -0.962, O14 = -0.767 (see Table S15).

Table S15: Output from the DFT modelling of **19** only.

| Center Number | Atomic Number | Atomic Type | Coordinates (Angstroms) |           |           |
|---------------|---------------|-------------|-------------------------|-----------|-----------|
|               |               |             | X                       | Y         | Z         |
| 1             | 6             | 0           | -1.037574               | -0.622530 | -0.313373 |
| 2             | 6             | 0           | 0.332944                | -0.639890 | -0.098466 |
| 3             | 6             | 0           | 0.969687                | 0.553529  | 0.221568  |
| 4             | 6             | 0           | 0.276504                | 1.753819  | 0.324557  |
| 5             | 6             | 0           | -1.093677               | 1.748001  | 0.105583  |
| 6             | 6             | 0           | -1.767192               | 0.565777  | -0.214818 |
| 7             | 1             | 0           | -1.549564               | -1.544874 | -0.562248 |
| 8             | 1             | 0           | 0.899009                | -1.560525 | -0.168194 |
| 9             | 1             | 0           | 0.800094                | 2.666874  | 0.579028  |
| 10            | 1             | 0           | -1.649514               | 2.675304  | 0.183817  |
| 11            | 16            | 0           | 2.714140                | 0.546911  | 0.469445  |
| 12            | 8             | 0           | 3.111195                | 1.699146  | 1.256166  |
| 13            | 8             | 0           | 3.156520                | -0.764234 | 0.906230  |
| 14            | 8             | 0           | 3.182244                | 0.772366  | -1.042096 |
| 15            | 6             | 0           | 4.626849                | 0.709485  | -1.300965 |
| 16            | 6             | 0           | 4.949992                | -0.629199 | -1.940969 |
| 17            | 6             | 0           | 4.962318                | 1.884354  | -2.200623 |
| 18            | 1             | 0           | 5.155301                | 0.812246  | -0.346459 |
| 19            | 6             | 0           | 6.427782                | -0.675818 | -2.343138 |
| 20            | 1             | 0           | 4.318558                | -0.741296 | -2.829097 |
| 21            | 1             | 0           | 4.701595                | -1.435216 | -1.247764 |
| 22            | 6             | 0           | 6.439383                | 1.832256  | -2.604556 |
| 23            | 1             | 0           | 4.329333                | 1.824345  | -3.092602 |
| 24            | 1             | 0           | 4.725056                | 2.817032  | -1.684256 |
| 25            | 6             | 0           | 6.783930                | 0.494211  | -3.263256 |
| 26            | 1             | 0           | 6.643824                | -1.628620 | -2.830789 |
| 27            | 1             | 0           | 7.050338                | -0.630155 | -1.442200 |
| 28            | 1             | 0           | 6.662717                | 2.662026  | -3.278253 |
| 29            | 1             | 0           | 7.063061                | 1.967428  | -1.713515 |
| 30            | 1             | 0           | 7.845555                | 0.463323  | -3.519133 |
| 31            | 1             | 0           | 6.223314                | 0.398905  | -4.200323 |
| 32            | 6             | 0           | -3.257460               | 0.567743  | -0.419531 |
| 33            | 1             | 0           | -3.767526               | 0.425245  | 0.536963  |
| 34            | 1             | 0           | -3.594589               | 1.516524  | -0.837706 |
| 35            | 1             | 0           | -3.563853               | -0.239771 | -1.084638 |

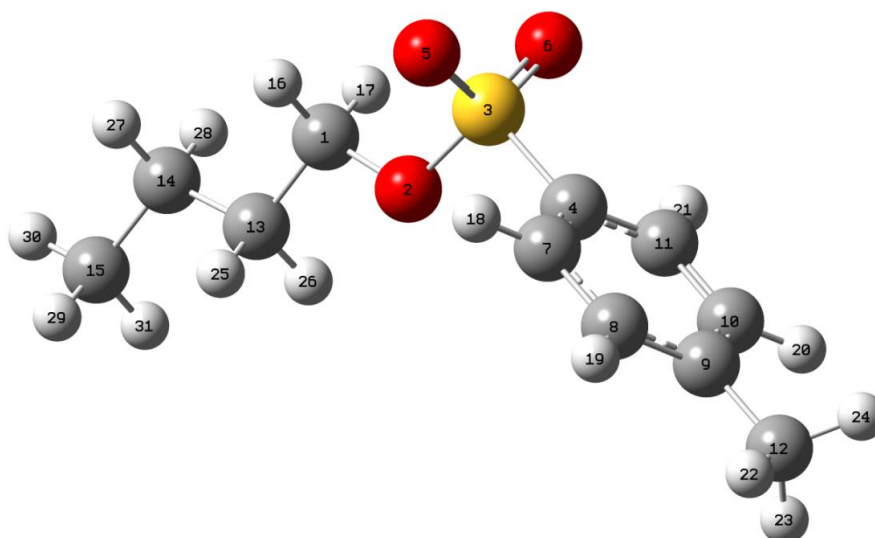

Figure S154: Output from the DFT modelling of **20** only. Total electronic energy (E(RM062X)): -1052.499642 Hartree. NBO Charges at Oxygen: O2 = -0.755, O5 = -0.959, O6 = -0.959 (see Table S16).

Table S16: Output from the DFT modelling of **20** only.

| Center Number | Atomic Number | Atomic Type | Coordinates (Angstroms) |           |           |
|---------------|---------------|-------------|-------------------------|-----------|-----------|
|               |               |             | X                       | Y         | Z         |
| 1             | 6             | 0           | -1.869619               | -0.041811 | -1.515264 |
| 2             | 8             | 0           | -0.638178               | 0.136850  | -0.759025 |
| 3             | 16            | 0           | 0.524511                | 0.964708  | -1.489151 |
| 4             | 6             | 0           | 1.770653                | 0.834945  | -0.251302 |
| 5             | 8             | 0           | 0.095129                | 2.342920  | -1.626068 |
| 6             | 8             | 0           | 0.922788                | 0.244015  | -2.682980 |
| 7             | 6             | 0           | 1.849674                | 1.813478  | 0.730312  |
| 8             | 6             | 0           | 2.827553                | 1.692511  | 1.709746  |
| 9             | 6             | 0           | 3.710835                | 0.611521  | 1.714503  |
| 10            | 6             | 0           | 3.601559                | -0.356771 | 0.709630  |
| 11            | 6             | 0           | 2.634085                | -0.256158 | -0.277132 |
| 12            | 6             | 0           | 4.771687                | 0.480497  | 2.772979  |
| 13            | 6             | 0           | -2.836972               | -0.775554 | -0.614236 |
| 14            | 6             | 0           | -4.168540               | -1.029766 | -1.319699 |
| 15            | 6             | 0           | -5.157347               | -1.763360 | -0.417274 |
| 16            | 1             | 0           | -2.251441               | 0.942929  | -1.795342 |
| 17            | 1             | 0           | -1.640756               | -0.617215 | -2.414930 |
| 18            | 1             | 0           | 1.168570                | 2.655223  | 0.719563  |
| 19            | 1             | 0           | 2.905759                | 2.450835  | 2.479827  |
| 20            | 1             | 0           | 4.286155                | -1.197445 | 0.702055  |
| 21            | 1             | 0           | 2.552941                | -0.998921 | -1.060936 |
| 22            | 1             | 0           | 4.724844                | 1.303764  | 3.484899  |
| 23            | 1             | 0           | 4.652759                | -0.457661 | 3.319266  |
| 24            | 1             | 0           | 5.764992                | 0.471275  | 2.319049  |
| 25            | 1             | 0           | -2.999973               | -0.182484 | 0.290250  |
| 26            | 1             | 0           | -2.387961               | -1.725472 | -0.309847 |
| 27            | 1             | 0           | -4.598238               | -0.075193 | -1.639146 |
| 28            | 1             | 0           | -3.992155               | -1.615138 | -2.227458 |
| 29            | 1             | 0           | -5.365108               | -1.180886 | 0.483622  |
| 30            | 1             | 0           | -6.104025               | -1.941491 | -0.929861 |
| 31            | 1             | 0           | -4.754187               | -2.730144 | -0.106048 |

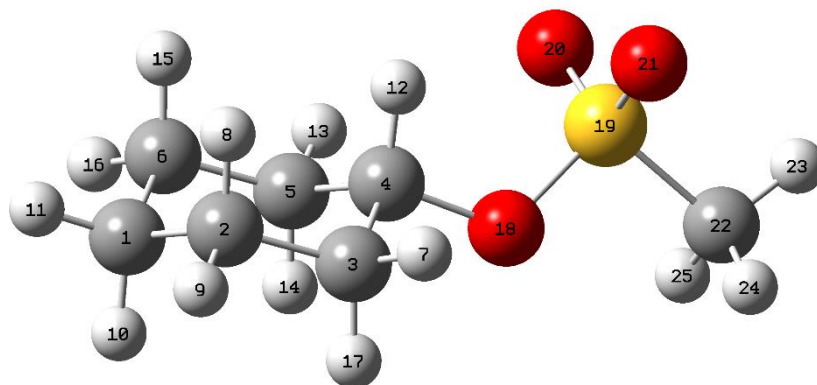

Figure S155: Output from the DFT modelling of **25** only. Total electronic energy (E(RM062X)): -898.910055 Hartree. NBO Charges at Oxygen: O18 = -0.771, O20 = -0.962, O21 = -0.961 (see Table S17).

Table S17: Output from the DFT modelling of **25** only.

| Center Number | Atomic Number | Atomic Type | Coordinates (Angstroms) |           |           |
|---------------|---------------|-------------|-------------------------|-----------|-----------|
|               |               |             | X                       | Y         | Z         |
| 1             | 6             | 0           | -2.501645               | -1.051162 | -0.077932 |
| 2             | 6             | 0           | -0.977116               | -1.181795 | -0.117033 |
| 3             | 6             | 0           | -0.302389               | 0.187621  | 0.012754  |
| 4             | 6             | 0           | -0.776839               | 0.884364  | 1.274289  |
| 5             | 6             | 0           | -2.287087               | 1.036466  | 1.325515  |
| 6             | 6             | 0           | -2.956478               | -0.335879 | 1.196226  |
| 7             | 1             | 0           | 0.785326                | 0.093071  | 0.036780  |
| 8             | 1             | 0           | -0.648570               | -1.826073 | 0.706499  |
| 9             | 1             | 0           | -0.655134               | -1.660958 | -1.043831 |
| 10            | 1             | 0           | -2.836772               | -0.479379 | -0.950979 |
| 11            | 1             | 0           | -2.965527               | -2.038119 | -0.142701 |
| 12            | 1             | 0           | -0.418684               | 0.337853  | 2.154085  |
| 13            | 1             | 0           | -2.573816               | 1.532556  | 2.254647  |
| 14            | 1             | 0           | -2.591065               | 1.679032  | 0.491961  |
| 15            | 1             | 0           | -2.697984               | -0.948923 | 2.067338  |
| 16            | 1             | 0           | -4.041681               | -0.215061 | 1.203524  |
| 17            | 1             | 0           | -0.565783               | 0.816124  | -0.844935 |
| 18            | 8             | 0           | -0.162507               | 2.217259  | 1.276517  |
| 19            | 16            | 0           | 0.431207                | 2.731063  | 2.667345  |
| 20            | 8             | 0           | -0.632869               | 2.791250  | 3.652740  |
| 21            | 8             | 0           | 1.605183                | 1.945920  | 3.001654  |
| 22            | 6             | 0           | 0.899870                | 4.356820  | 2.157341  |
| 23            | 1             | 0           | 1.340335                | 4.837762  | 3.028903  |
| 24            | 1             | 0           | 1.626201                | 4.264000  | 1.353815  |
| 25            | 1             | 0           | 0.004524                | 4.880773  | 1.832515  |

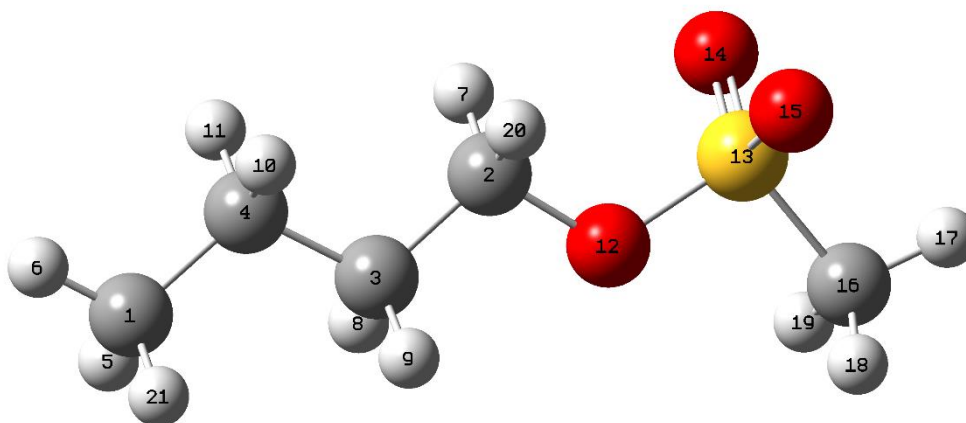

Figure S156: Output from the DFT modelling of **26** only. Total electronic energy (E(RM062X)): -821.490942 Hartree. NBO Charges at Oxygen: O12 = -0.759, O14 = -0.959, O15 = -0.958 (see Table S18).

Table S18: Output from the DFT modelling of **26** only.

| Center Number | Atomic Number | Atomic Type | Coordinates (Angstroms) |           |           |
|---------------|---------------|-------------|-------------------------|-----------|-----------|
|               |               |             | X                       | Y         | Z         |
| 1             | 6             | 0           | -2.127437               | -1.117562 | -1.772035 |
| 2             | 6             | 0           | -0.695308               | 0.866798  | 1.225895  |
| 3             | 6             | 0           | -1.095864               | 0.577392  | -0.202843 |
| 4             | 6             | 0           | -1.718288               | -0.812188 | -0.333441 |
| 5             | 1             | 0           | -2.859579               | -0.389291 | -2.129339 |
| 6             | 1             | 0           | -2.571302               | -2.110924 | -1.854842 |
| 7             | 1             | 0           | -1.557527               | 0.848302  | 1.896362  |
| 8             | 1             | 0           | -1.808913               | 1.338568  | -0.532664 |
| 9             | 1             | 0           | -0.212008               | 0.652935  | -0.842806 |
| 10            | 1             | 0           | -1.003615               | -1.564345 | 0.014985  |
| 11            | 1             | 0           | -2.592231               | -0.880972 | 0.321808  |
| 12            | 8             | 0           | -0.126921               | 2.206157  | 1.245299  |
| 13            | 16            | 0           | 0.381486                | 2.735143  | 2.669069  |
| 14            | 8             | 0           | -0.750642               | 2.823446  | 3.571817  |
| 15            | 8             | 0           | 1.518970                | 1.940130  | 3.090954  |
| 16            | 6             | 0           | 0.902627                | 4.345604  | 2.164364  |
| 17            | 1             | 0           | 1.287692                | 4.837649  | 3.055695  |
| 18            | 1             | 0           | 1.681460                | 4.229848  | 1.414792  |
| 19            | 1             | 0           | 0.038118                | 4.873144  | 1.769358  |
| 20            | 1             | 0           | 0.062429                | 0.164332  | 1.580952  |
| 21            | 1             | 0           | -1.261878               | -1.077411 | -2.437795 |

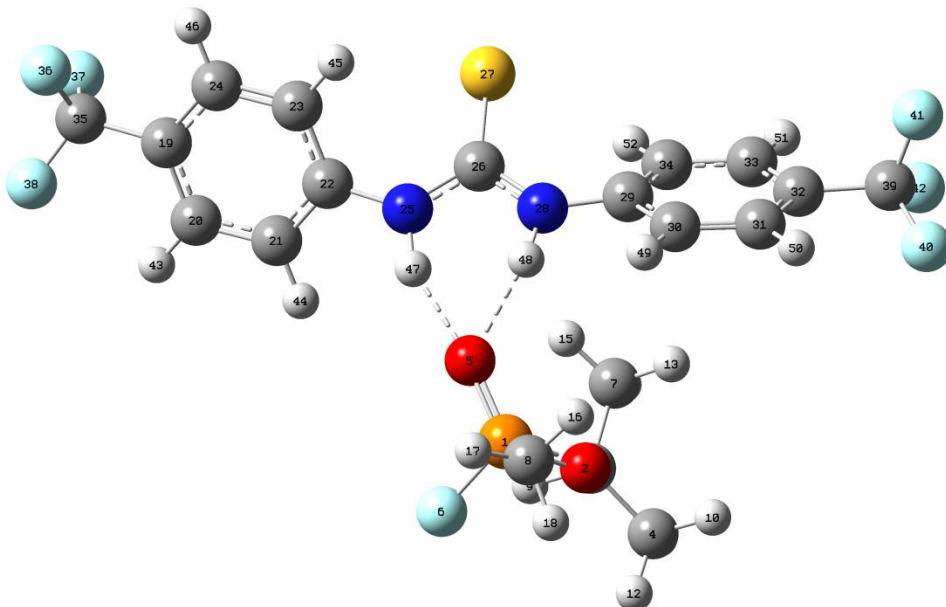

Figure S157: Output from the DFT modelling of 1:sarin initiated with the P=O coordinated to the receptor through the formation of two hydrogen bonds. Total electronic energy (E(RM062X)): -2434.452868 Hartree. Binding mode 1 (see Table S19).

Table S19: Output from the DFT modelling of 1:sarin initiated with the P=O coordinated to the receptor through the formation of two hydrogen bonds.

| Center Number | Atomic Number | Atomic Type | Coordinates (Angstroms) |           |           |
|---------------|---------------|-------------|-------------------------|-----------|-----------|
|               |               |             | X                       | Y         | Z         |
| 1             | 15            | 0           | -0.619303               | 0.332180  | -0.857176 |
| 2             | 8             | 0           | -0.270019               | -0.871439 | 0.091237  |
| 3             | 6             | 0           | -0.541020               | -0.856085 | 1.536786  |
| 4             | 6             | 0           | 0.499898                | -1.762565 | 2.154853  |
| 5             | 8             | 0           | -2.015682               | 0.829554  | -0.811880 |
| 6             | 9             | 0           | 0.351731                | 1.481520  | -0.355122 |
| 7             | 6             | 0           | -1.964589               | -1.314774 | 1.780394  |
| 8             | 6             | 0           | 0.026349                | -0.131747 | -2.441786 |
| 9             | 1             | 0           | -0.401367               | 0.171080  | 1.884677  |
| 10            | 1             | 0           | 0.381540                | -2.778415 | 1.772262  |
| 11            | 1             | 0           | 0.372723                | -1.779310 | 3.238270  |
| 12            | 1             | 0           | 1.504809                | -1.409588 | 1.923101  |
| 13            | 1             | 0           | -2.121451               | -2.299818 | 1.333179  |
| 14            | 1             | 0           | -2.144754               | -1.384822 | 2.854679  |
| 15            | 1             | 0           | -2.682156               | -0.612672 | 1.354634  |
| 16            | 1             | 0           | -0.555350               | -0.970159 | -2.824129 |
| 17            | 1             | 0           | -0.067385               | 0.714496  | -3.121545 |
| 18            | 1             | 0           | 1.071618                | -0.420698 | -2.345532 |
| 19            | 6             | 0           | -6.204981               | 5.611300  | 0.174246  |
| 20            | 6             | 0           | -4.999837               | 5.251209  | 0.764113  |
| 21            | 6             | 0           | -4.534882               | 3.950307  | 0.632698  |
| 22            | 6             | 0           | -5.270583               | 3.011550  | -0.090806 |
| 23            | 6             | 0           | -6.470330               | 3.384316  | -0.700933 |
| 24            | 6             | 0           | -6.937815               | 4.680586  | -0.558258 |
| 25            | 7             | 0           | -4.716608               | 1.724092  | -0.244752 |
| 26            | 6             | 0           | -5.345691               | 0.519761  | -0.164277 |
| 27            | 16            | 0           | -6.952164               | 0.314314  | 0.289757  |
| 28            | 7             | 0           | -4.503916               | -0.491654 | -0.506826 |

|    |   |   |           |           |           |
|----|---|---|-----------|-----------|-----------|
| 29 | 6 | 0 | -4.616143 | -1.881040 | -0.327702 |
| 30 | 6 | 0 | -3.884188 | -2.679362 | -1.212926 |
| 31 | 6 | 0 | -3.847855 | -4.054436 | -1.051059 |
| 32 | 6 | 0 | -4.547161 | -4.641742 | -0.001558 |
| 33 | 6 | 0 | -5.272166 | -3.852653 | 0.885066  |
| 34 | 6 | 0 | -5.304371 | -2.474120 | 0.733032  |
| 35 | 6 | 0 | -6.750257 | 6.993244  | 0.354475  |
| 36 | 9 | 0 | -7.376894 | 7.435583  | -0.746983 |
| 37 | 9 | 0 | -7.652535 | 7.052226  | 1.350932  |
| 38 | 9 | 0 | -5.794050 | 7.884309  | 0.651696  |
| 39 | 6 | 0 | -4.555940 | -6.130563 | 0.143593  |
| 40 | 9 | 0 | -3.413627 | -6.687455 | -0.286742 |
| 41 | 9 | 0 | -5.546663 | -6.701715 | -0.565889 |
| 42 | 9 | 0 | -4.730559 | -6.515597 | 1.416439  |
| 43 | 1 | 0 | -4.426182 | 5.978344  | 1.324344  |
| 44 | 1 | 0 | -3.600148 | 3.655281  | 1.094377  |
| 45 | 1 | 0 | -7.020921 | 2.666286  | -1.290614 |
| 46 | 1 | 0 | -7.864199 | 4.974997  | -1.036118 |
| 47 | 1 | 0 | -3.701527 | 1.691903  | -0.339448 |
| 48 | 1 | 0 | -3.602700 | -0.194053 | -0.881396 |
| 49 | 1 | 0 | -3.340844 | -2.211967 | -2.026272 |
| 50 | 1 | 0 | -3.274663 | -4.666200 | -1.736400 |
| 51 | 1 | 0 | -5.796828 | -4.311728 | 1.713761  |
| 52 | 1 | 0 | -5.841509 | -1.863345 | 1.441921  |

---



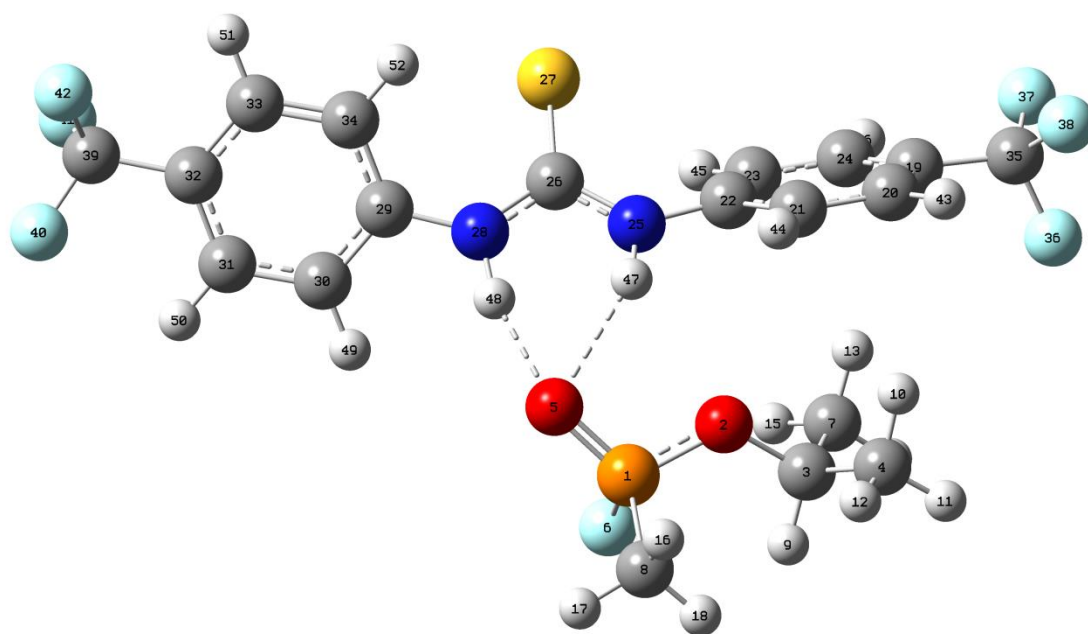

Figure S158: Output from the DFT modelling of **1**:sarin initiated with the O=P=O coordinated to the receptor through the formation of two hydrogen bonds, one to each oxygen atom. Total electronic energy (E(RM062X)): -2434.454821 Hartree. Binding mode 2 (see Table S20).

Table S20: Output from the DFT modelling of **1**:sarin initiated with the O=P=O coordinated to the receptor through the formation of two hydrogen bonds, one to each oxygen atom.

| Center Number | Atomic Number | Atomic Type | Coordinates (Angstroms) |           |           |
|---------------|---------------|-------------|-------------------------|-----------|-----------|
|               |               |             | X                       | Y         | Z         |
| 1             | 15            | 0           | -1.390437               | 1.007444  | 1.118029  |
| 2             | 8             | 0           | -2.119294               | 2.376345  | 0.842181  |
| 3             | 6             | 0           | -1.443118               | 3.563424  | 0.300437  |
| 4             | 6             | 0           | -1.513319               | 4.643750  | 1.357726  |
| 5             | 8             | 0           | -2.368702               | -0.051319 | 1.440752  |
| 6             | 9             | 0           | -0.647806               | 0.717377  | -0.253156 |
| 7             | 6             | 0           | -2.141283               | 3.927115  | -0.992129 |
| 8             | 6             | 0           | -0.051176               | 1.244038  | 2.262139  |
| 9             | 1             | 0           | -0.402792               | 3.295333  | 0.094602  |
| 10            | 1             | 0           | -2.557423               | 4.874098  | 1.579129  |
| 11            | 1             | 0           | -1.024976               | 5.547996  | 0.990677  |
| 12            | 1             | 0           | -1.016895               | 4.327904  | 2.276620  |
| 13            | 1             | 0           | -3.174798               | 4.216280  | -0.792883 |
| 14            | 1             | 0           | -1.626161               | 4.768750  | -1.458780 |
| 15            | 1             | 0           | -2.133247               | 3.082785  | -1.682812 |
| 16            | 1             | 0           | -0.472300               | 1.507757  | 3.232172  |
| 17            | 1             | 0           | 0.511997                | 0.315397  | 2.350011  |
| 18            | 1             | 0           | 0.611624                | 2.039454  | 1.920323  |
| 19            | 6             | 0           | -5.798634               | 5.100277  | -0.538551 |
| 20            | 6             | 0           | -5.435589               | 4.763851  | 0.761152  |
| 21            | 6             | 0           | -5.200381               | 3.436012  | 1.083830  |
| 22            | 6             | 0           | -5.321638               | 2.444311  | 0.108681  |
| 23            | 6             | 0           | -5.678790               | 2.787699  | -1.195845 |
| 24            | 6             | 0           | -5.921054               | 4.115614  | -1.514254 |
| 25            | 7             | 0           | -4.982689               | 1.127206  | 0.476446  |

|    |    |   |           |           |           |
|----|----|---|-----------|-----------|-----------|
| 26 | 6  | 0 | -5.593535 | -0.042107 | 0.141708  |
| 27 | 16 | 0 | -7.054608 | -0.135331 | -0.689829 |
| 28 | 7  | 0 | -4.873838 | -1.112740 | 0.566797  |
| 29 | 6  | 0 | -5.200311 | -2.480627 | 0.488127  |
| 30 | 6  | 0 | -4.171309 | -3.366467 | 0.163335  |
| 31 | 6  | 0 | -4.409145 | -4.732453 | 0.129207  |
| 32 | 6  | 0 | -5.680177 | -5.214864 | 0.417644  |
| 33 | 6  | 0 | -6.706779 | -4.336844 | 0.754787  |
| 34 | 6  | 0 | -6.469876 | -2.972161 | 0.800417  |
| 35 | 6  | 0 | -5.959288 | 6.539999  | -0.910813 |
| 36 | 9  | 0 | -4.788330 | 7.086981  | -1.290629 |
| 37 | 9  | 0 | -6.808088 | 6.711085  | -1.933856 |
| 38 | 9  | 0 | -6.410324 | 7.282612  | 0.110517  |
| 39 | 6  | 0 | -5.967243 | -6.680483 | 0.326167  |
| 40 | 9  | 0 | -4.865519 | -7.426659 | 0.490396  |
| 41 | 9  | 0 | -6.483909 | -7.019211 | -0.869322 |
| 42 | 9  | 0 | -6.857801 | -7.079365 | 1.247670  |
| 43 | 1  | 0 | -5.340544 | 5.532566  | 1.518323  |
| 44 | 1  | 0 | -4.916839 | 3.160312  | 2.092541  |
| 45 | 1  | 0 | -5.748399 | 2.023134  | -1.955396 |
| 46 | 1  | 0 | -6.191737 | 4.385938  | -2.527381 |
| 47 | 1  | 0 | -4.196603 | 1.054542  | 1.115823  |
| 48 | 1  | 0 | -3.918524 | -0.910419 | 0.869737  |
| 49 | 1  | 0 | -3.185796 | -2.977821 | -0.064798 |
| 50 | 1  | 0 | -3.608430 | -5.416355 | -0.121665 |
| 51 | 1  | 0 | -7.688626 | -4.720963 | 1.003097  |
| 52 | 1  | 0 | -7.256589 | -2.291235 | 1.088600  |

---

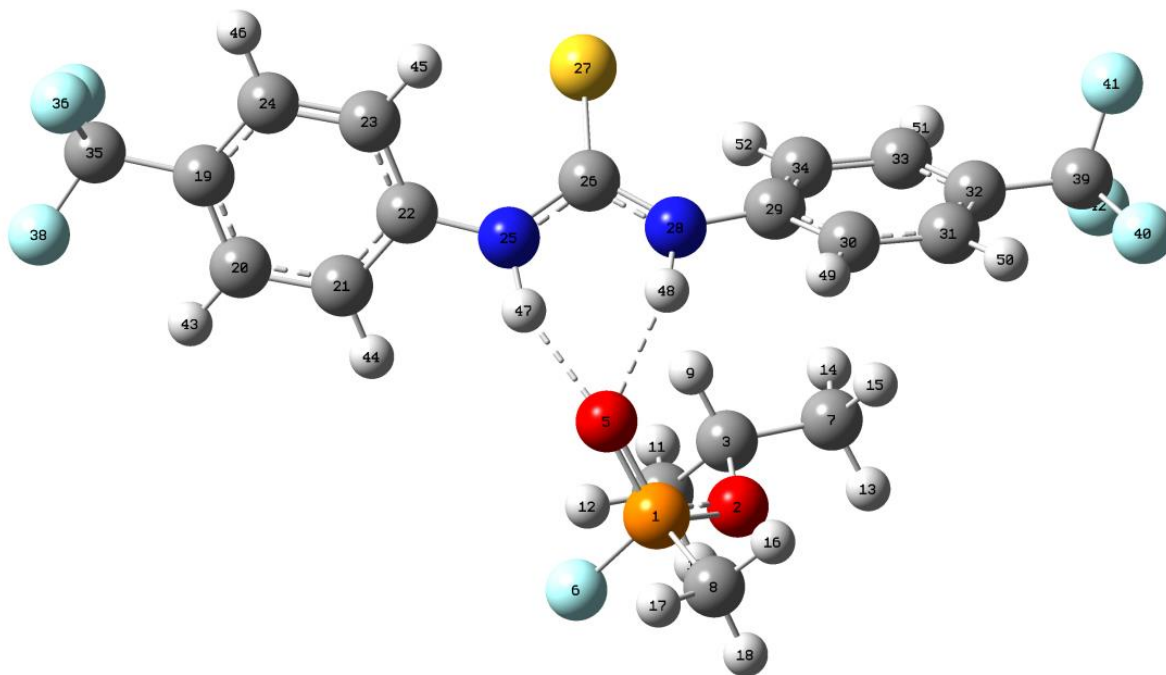

Figure S159: Output from the DFT modelling of **1**:sarin initiated with the F-P=O coordinated to the receptor through the formation of two hydrogen bonds, one to the oxygen and one to the fluorine atom. Total electronic energy (E(RM062X)): -2434.455439 Hartree. Binding mode 3 (see Table S21).

Table S21: Output from the DFT modelling of **1**:sarin initiated with the F-P=O coordinated to the receptor through the formation of two hydrogen bonds, one to the oxygen and one to the fluorine atom.

| Center Number | Atomic Number | Atomic Type | Coordinates (Angstroms) |           |           |
|---------------|---------------|-------------|-------------------------|-----------|-----------|
|               |               |             | X                       | Y         | Z         |
| 1             | 15            | 0           | -0.629546               | 0.675426  | 0.013940  |
| 2             | 8             | 0           | -0.724123               | -0.392551 | 1.164178  |
| 3             | 6             | 0           | -1.780054               | -0.389607 | 2.186169  |
| 4             | 6             | 0           | -1.415514               | 0.606064  | 3.269514  |
| 5             | 8             | 0           | -1.921432               | 1.091712  | -0.584777 |
| 6             | 9             | 0           | 0.050283                | 1.930299  | 0.707791  |
| 7             | 6             | 0           | -1.876563               | -1.815556 | 2.680801  |
| 8             | 6             | 0           | 0.627471                | 0.068399  | -1.078274 |
| 9             | 1             | 0           | -2.708557               | -0.093616 | 1.691163  |
| 10            | 1             | 0           | -0.446735               | 0.347055  | 3.701422  |
| 11            | 1             | 0           | -2.170504               | 0.575762  | 4.056845  |
| 12            | 1             | 0           | -1.367849               | 1.623821  | 2.879457  |
| 13            | 1             | 0           | -0.932239               | -2.115655 | 3.139985  |
| 14            | 1             | 0           | -2.670315               | -1.889362 | 3.426173  |
| 15            | 1             | 0           | -2.108339               | -2.494265 | 1.858168  |
| 16            | 1             | 0           | 0.257297                | -0.827832 | -1.574743 |
| 17            | 1             | 0           | 0.848330                | 0.833412  | -1.821847 |
| 18            | 1             | 0           | 1.525389                | -0.168460 | -0.509511 |
| 19            | 6             | 0           | -6.243253               | 5.805755  | -0.407677 |
| 20            | 6             | 0           | -5.023791               | 5.559463  | 0.209636  |
| 21            | 6             | 0           | -4.527830               | 4.263894  | 0.252966  |
| 22            | 6             | 0           | -5.247009               | 3.216828  | -0.323154 |

|    |    |   |           |           |           |
|----|----|---|-----------|-----------|-----------|
| 23 | 6  | 0 | -6.461974 | 3.473132  | -0.963250 |
| 24 | 6  | 0 | -6.959571 | 4.765325  | -0.995180 |
| 25 | 7  | 0 | -4.661779 | 1.934640  | -0.301782 |
| 26 | 6  | 0 | -5.257824 | 0.739122  | -0.045173 |
| 27 | 16 | 0 | -6.855183 | 0.553706  | 0.443275  |
| 28 | 7  | 0 | -4.387378 | -0.289620 | -0.244447 |
| 29 | 6  | 0 | -4.448298 | -1.633126 | 0.165325  |
| 30 | 6  | 0 | -3.703308 | -2.546973 | -0.585491 |
| 31 | 6  | 0 | -3.626924 | -3.876804 | -0.199507 |
| 32 | 6  | 0 | -4.296713 | -4.298787 | 0.942398  |
| 33 | 6  | 0 | -5.034897 | -3.391929 | 1.698127  |
| 34 | 6  | 0 | -5.108853 | -2.060482 | 1.321477  |
| 35 | 6  | 0 | -6.824590 | 7.184674  | -0.419897 |
| 36 | 9  | 0 | -7.389314 | 7.481798  | -1.601420 |
| 37 | 9  | 0 | -7.790600 | 7.330911  | 0.505170  |
| 38 | 9  | 0 | -5.907699 | 8.129140  | -0.170331 |
| 39 | 6  | 0 | -4.259037 | -5.733043 | 1.365928  |
| 40 | 9  | 0 | -3.284026 | -6.421198 | 0.757390  |
| 41 | 9  | 0 | -5.411675 | -6.370336 | 1.092487  |
| 42 | 9  | 0 | -4.066770 | -5.858716 | 2.689461  |
| 43 | 1  | 0 | -4.463187 | 6.370053  | 0.656872  |
| 44 | 1  | 0 | -3.580861 | 4.058031  | 0.737849  |
| 45 | 1  | 0 | -7.000921 | 2.668205  | -1.440755 |
| 46 | 1  | 0 | -7.898358 | 4.968535  | -1.496289 |
| 47 | 1  | 0 | -3.643274 | 1.915373  | -0.371667 |
| 48 | 1  | 0 | -3.502533 | -0.027337 | -0.676715 |
| 49 | 1  | 0 | -3.183024 | -2.208207 | -1.473889 |
| 50 | 1  | 0 | -3.045953 | -4.578011 | -0.784451 |
| 51 | 1  | 0 | -5.535756 | -3.720391 | 2.601184  |
| 52 | 1  | 0 | -5.658071 | -1.355337 | 1.926252  |

---

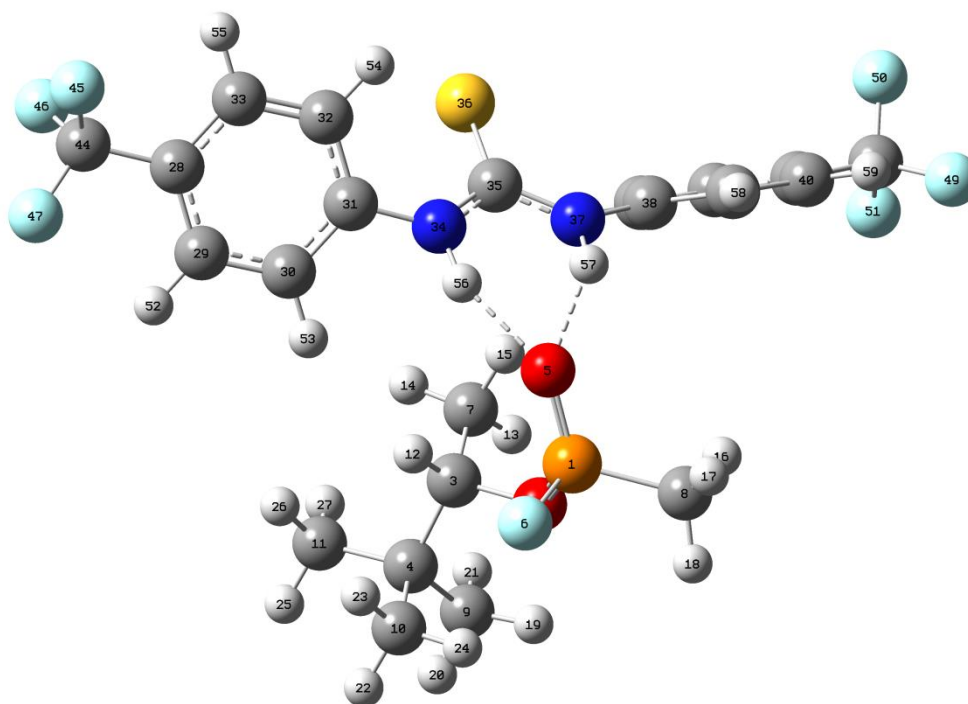

Figure S160: Output from the DFT modelling of **1**:soman initiated with the P=O coordinated to the receptor through the formation of two hydrogen bonds. Total electronic energy (E(RM062X)): -2552.369778 Hartree. Binding mode 1 (see Table S22).

Table S22: Output from the DFT modelling of **1**:soman initiated with the P=O coordinated to the receptor through the formation of two hydrogen bonds.

| Center Number | Atomic Number | Atomic Type | Coordinates (Angstroms) |           |           |
|---------------|---------------|-------------|-------------------------|-----------|-----------|
|               |               |             | X                       | Y         | Z         |
| 1             | 15            | 0           | 0.002840                | 2.455866  | -0.630580 |
| 2             | 8             | 0           | 0.060668                | 0.884377  | -0.639550 |
| 3             | 6             | 0           | -0.906466               | 0.078717  | 0.117251  |
| 4             | 6             | 0           | -0.117216               | -1.036687 | 0.818540  |
| 5             | 8             | 0           | -1.358064               | 3.046659  | -0.603377 |
| 6             | 9             | 0           | 0.760623                | 2.845888  | 0.706936  |
| 7             | 6             | 0           | -1.991934               | -0.350700 | -0.850388 |
| 8             | 6             | 0           | 1.104954                | 2.971868  | -1.918858 |
| 9             | 6             | 0           | 0.604177                | -1.928431 | -0.196608 |
| 10            | 6             | 0           | 0.911193                | -0.391501 | 1.755088  |
| 11            | 6             | 0           | -1.097779               | -1.874307 | 1.648581  |
| 12            | 1             | 0           | -1.337451               | 0.721642  | 0.893125  |
| 13            | 1             | 0           | -1.585381               | -0.988792 | -1.636195 |
| 14            | 1             | 0           | -2.783896               | -0.886751 | -0.325691 |
| 15            | 1             | 0           | -2.431566               | 0.531748  | -1.317154 |
| 16            | 1             | 0           | 0.664609                | 2.704223  | -2.879036 |
| 17            | 1             | 0           | 1.234949                | 4.052056  | -1.864534 |
| 18            | 1             | 0           | 2.066260                | 2.473669  | -1.801405 |
| 19            | 1             | 0           | 1.259156                | -1.336612 | -0.839454 |
| 20            | 1             | 0           | 1.217277                | -2.661370 | 0.333375  |

|    |    |   |           |           |           |
|----|----|---|-----------|-----------|-----------|
| 21 | 1  | 0 | -0.099380 | -2.477928 | -0.825725 |
| 22 | 1  | 0 | 1.436530  | -1.164715 | 2.320228  |
| 23 | 1  | 0 | 0.423851  | 0.279186  | 2.469209  |
| 24 | 1  | 0 | 1.650806  | 0.182321  | 1.193835  |
| 25 | 1  | 0 | -0.541433 | -2.596066 | 2.250843  |
| 26 | 1  | 0 | -1.679971 | -1.245381 | 2.329186  |
| 27 | 1  | 0 | -1.790819 | -2.432160 | 1.015774  |
| 28 | 6  | 0 | -6.321528 | 2.365700  | 3.401157  |
| 29 | 6  | 0 | -5.066349 | 1.778901  | 3.319294  |
| 30 | 6  | 0 | -4.369056 | 1.819683  | 2.118711  |
| 31 | 6  | 0 | -4.922546 | 2.450212  | 1.006443  |
| 32 | 6  | 0 | -6.176748 | 3.058233  | 1.100631  |
| 33 | 6  | 0 | -6.875946 | 3.006388  | 2.294395  |
| 34 | 7  | 0 | -4.147784 | 2.520984  | -0.172122 |
| 35 | 6  | 0 | -4.554789 | 2.279227  | -1.446207 |
| 36 | 16 | 0 | -6.072723 | 1.677905  | -1.858220 |
| 37 | 7  | 0 | -3.581781 | 2.567672  | -2.349253 |
| 38 | 6  | 0 | -3.559398 | 2.277710  | -3.731925 |
| 39 | 6  | 0 | -3.081760 | 3.262282  | -4.594937 |
| 40 | 6  | 0 | -2.973404 | 3.004058  | -5.955146 |
| 41 | 6  | 0 | -3.348669 | 1.761237  | -6.448136 |
| 42 | 6  | 0 | -3.817034 | 0.770551  | -5.587697 |
| 43 | 6  | 0 | -3.914029 | 1.021672  | -4.229026 |
| 44 | 6  | 0 | -7.116249 | 2.294687  | 4.667619  |
| 45 | 9  | 0 | -7.697737 | 3.469031  | 4.961401  |
| 46 | 9  | 0 | -8.111391 | 1.393363  | 4.585607  |
| 47 | 9  | 0 | -6.368435 | 1.948153  | 5.723483  |
| 48 | 6  | 0 | -3.293148 | 1.482002  | -7.917850 |
| 49 | 9  | 0 | -2.459843 | 2.309004  | -8.563730 |
| 50 | 9  | 0 | -4.498050 | 1.617076  | -8.500445 |
| 51 | 9  | 0 | -2.888448 | 0.228570  | -8.176501 |
| 52 | 1  | 0 | -4.633106 | 1.289229  | 4.181694  |
| 53 | 1  | 0 | -3.392779 | 1.356768  | 2.043136  |
| 54 | 1  | 0 | -6.589008 | 3.574445  | 0.245677  |
| 55 | 1  | 0 | -7.846024 | 3.482468  | 2.372553  |
| 56 | 1  | 0 | -3.150952 | 2.703625  | -0.044214 |
| 57 | 1  | 0 | -2.746893 | 3.022830  | -1.982195 |
| 58 | 1  | 0 | -2.801059 | 4.229940  | -4.196998 |
| 59 | 1  | 0 | -2.601415 | 3.768605  | -6.624919 |
| 60 | 1  | 0 | -4.085349 | -0.203918 | -5.977334 |
| 61 | 1  | 0 | -4.254570 | 0.250811  | -3.552395 |

---

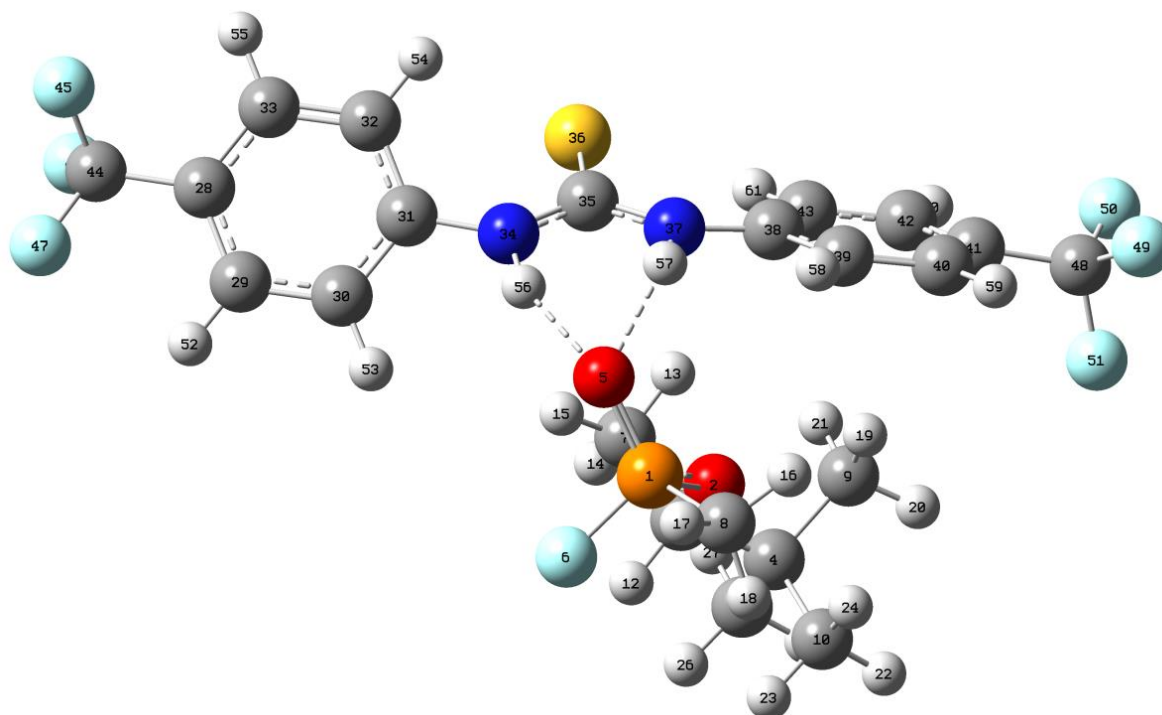

Figure S161: Output from the DFT modelling of **1**:soman initiated with the O-P=O coordinated to the receptor through the formation of two hydrogen bonds, one to each oxygen atom. Total electronic energy (E(RM062X)): -2552.371688 Hartree. Binding mode 2 (see Table S23).

Table S23: Output from the DFT modelling of **1**:soman initiated with the O-P=O coordinated to the receptor through the formation of two hydrogen bonds, one to each oxygen atom.

| Center Number | Atomic Number | Atomic Type | Coordinates (Angstroms) |           |           |
|---------------|---------------|-------------|-------------------------|-----------|-----------|
|               |               |             | X                       | Y         | Z         |
| 1             | 15            | 0           | -0.881646               | 2.587035  | -0.911564 |
| 2             | 8             | 0           | -1.153632               | 1.375080  | -1.872446 |
| 3             | 6             | 0           | -1.527253               | 0.009471  | -1.484278 |
| 4             | 6             | 0           | -1.059774               | -0.903969 | -2.628214 |
| 5             | 8             | 0           | -2.041959               | 3.473041  | -0.647844 |
| 6             | 9             | 0           | -0.422804               | 1.887381  | 0.436074  |
| 7             | 6             | 0           | -3.009150               | -0.016968 | -1.161565 |
| 8             | 6             | 0           | 0.582749                | 3.380096  | -1.523716 |
| 9             | 6             | 0           | -1.809711               | -0.592049 | -3.926757 |
| 10            | 6             | 0           | 0.444766                | -0.692270 | -2.838172 |
| 11            | 6             | 0           | -1.305776               | -2.360791 | -2.216639 |
| 12            | 1             | 0           | -0.944403               | -0.235260 | -0.591434 |
| 13            | 1             | 0           | -3.604839               | 0.248434  | -2.036402 |
| 14            | 1             | 0           | -3.302406               | -1.010742 | -0.821781 |
| 15            | 1             | 0           | -3.237600               | 0.686756  | -0.356942 |
| 16            | 1             | 0           | 0.369963                | 3.783309  | -2.513933 |
| 17            | 1             | 0           | 0.858576                | 4.193046  | -0.853334 |
| 18            | 1             | 0           | 1.392064                | 2.654229  | -1.590581 |
| 19            | 1             | 0           | -1.749107               | 0.472209  | -4.169108 |
| 20            | 1             | 0           | -1.368996               | -1.155904 | -4.752972 |
| 21            | 1             | 0           | -2.864301               | -0.868608 | -3.860744 |
| 22            | 1             | 0           | 0.820390                | -1.405635 | -3.575291 |
| 23            | 1             | 0           | 0.996181                | -0.845399 | -1.905328 |
| 24            | 1             | 0           | 0.652888                | 0.315656  | -3.201172 |

|    |    |   |           |           |           |
|----|----|---|-----------|-----------|-----------|
| 25 | 1  | 0 | -0.891493 | -3.027074 | -2.976774 |
| 26 | 1  | 0 | -0.819397 | -2.591690 | -1.264290 |
| 27 | 1  | 0 | -2.370553 | -2.583808 | -2.125081 |
| 28 | 6  | 0 | -6.852193 | 2.934830  | 3.489884  |
| 29 | 6  | 0 | -5.522841 | 2.541219  | 3.411380  |
| 30 | 6  | 0 | -4.877683 | 2.550441  | 2.182076  |
| 31 | 6  | 0 | -5.559165 | 2.956334  | 1.034908  |
| 32 | 6  | 0 | -6.889518 | 3.373375  | 1.122856  |
| 33 | 6  | 0 | -7.533669 | 3.352630  | 2.348516  |
| 34 | 7  | 0 | -4.834559 | 3.008371  | -0.173188 |
| 35 | 6  | 0 | -5.224621 | 2.575076  | -1.405526 |
| 36 | 16 | 0 | -6.663486 | 1.760273  | -1.697911 |
| 37 | 7  | 0 | -4.283070 | 2.880673  | -2.340771 |
| 38 | 6  | 0 | -4.075088 | 2.462052  | -3.662938 |
| 39 | 6  | 0 | -3.022559 | 3.110876  | -4.329395 |
| 40 | 6  | 0 | -2.664589 | 2.746173  | -5.612673 |
| 41 | 6  | 0 | -3.358734 | 1.724438  | -6.256604 |
| 42 | 6  | 0 | -4.409278 | 1.087423  | -5.612269 |
| 43 | 6  | 0 | -4.776437 | 1.447824  | -4.321298 |
| 44 | 6  | 0 | -7.585262 | 2.884626  | 4.793655  |
| 45 | 9  | 0 | -8.370551 | 3.959532  | 4.970073  |
| 46 | 9  | 0 | -8.393352 | 1.812059  | 4.874909  |
| 47 | 9  | 0 | -6.757010 | 2.822274  | 5.844875  |
| 48 | 6  | 0 | -2.913223 | 1.256986  | -7.603897 |
| 49 | 9  | 0 | -2.371463 | 2.244785  | -8.332268 |
| 50 | 9  | 0 | -3.918485 | 0.736900  | -8.322932 |
| 51 | 9  | 0 | -1.973806 | 0.294747  | -7.513549 |
| 52 | 1  | 0 | -4.991703 | 2.226607  | 4.300348  |
| 53 | 1  | 0 | -3.841396 | 2.241335  | 2.107630  |
| 54 | 1  | 0 | -7.405025 | 3.721308  | 0.239628  |
| 55 | 1  | 0 | -8.563248 | 3.681630  | 2.421785  |
| 56 | 1  | 0 | -3.847192 | 3.252428  | -0.079608 |
| 57 | 1  | 0 | -3.501399 | 3.421126  | -1.975748 |
| 58 | 1  | 0 | -2.486413 | 3.909558  | -3.828868 |
| 59 | 1  | 0 | -1.849073 | 3.254152  | -6.112251 |
| 60 | 1  | 0 | -4.949635 | 0.293354  | -6.113138 |
| 61 | 1  | 0 | -5.589952 | 0.937420  | -3.833878 |

---



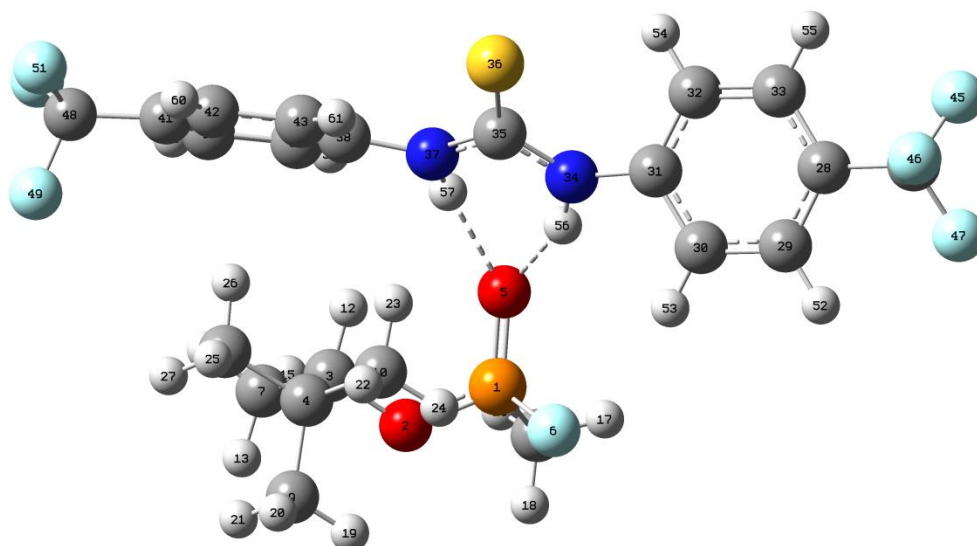

Figure S162: Output from the DFT modelling of **1:soman** initiated with the F-P=O coordinated to the receptor through the formation of two hydrogen bonds, one to the oxygen and one to the fluorine atom. Total electronic energy (E(RM062X)): -2552.373506 Hartree. Binding mode 3 (see Table S24).

Table S24: Output from the DFT modelling of **1:soman** initiated with the F-P=O coordinated to the receptor through the formation of two hydrogen bonds, one to the oxygen and one to the fluorine atom.

| Center Number | Atomic Number | Atomic Type | Coordinates (Angstroms) |           |           |
|---------------|---------------|-------------|-------------------------|-----------|-----------|
|               |               |             | X                       | Y         | Z         |
| 1             | 15            | 0           | -0.744860               | 2.373389  | 1.082010  |
| 2             | 8             | 0           | 0.040977                | 1.129997  | 0.531159  |
| 3             | 6             | 0           | -0.265764               | 0.426559  | -0.719816 |
| 4             | 6             | 0           | -0.815094               | -0.967562 | -0.379521 |
| 5             | 8             | 0           | -1.813416               | 2.900354  | 0.197472  |
| 6             | 9             | 0           | -1.386566               | 1.818775  | 2.423281  |
| 7             | 6             | 0           | 0.994107                | 0.479652  | -1.559522 |
| 8             | 6             | 0           | 0.469399                | 3.523138  | 1.673111  |
| 9             | 6             | 0           | 0.158928                | -1.755313 | 0.500675  |
| 10            | 6             | 0           | -2.149585               | -0.798113 | 0.358323  |
| 11            | 6             | 0           | -1.058788               | -1.718159 | -1.695476 |
| 12            | 1             | 0           | -1.057990               | 0.988013  | -1.221420 |
| 13            | 1             | 0           | 1.807312                | -0.076468 | -1.090936 |
| 14            | 1             | 0           | 0.803113                | 0.064172  | -2.549840 |
| 15            | 1             | 0           | 1.307195                | 1.517549  | -1.680586 |
| 16            | 1             | 0           | 1.000324                | 3.937845  | 0.816740  |
| 17            | 1             | 0           | -0.029746               | 4.322939  | 2.218968  |
| 18            | 1             | 0           | 1.172107                | 3.008281  | 2.327011  |
| 19            | 1             | 0           | 0.358855                | -1.225314 | 1.434095  |
| 20            | 1             | 0           | -0.276196               | -2.727325 | 0.745908  |
| 21            | 1             | 0           | 1.108526                | -1.935911 | -0.007881 |
| 22            | 1             | 0           | -2.601546               | -1.774793 | 0.545187  |
| 23            | 1             | 0           | -2.855851               | -0.206966 | -0.234697 |
| 24            | 1             | 0           | -2.011360               | -0.307495 | 1.324638  |
| 25            | 1             | 0           | -1.609607               | -2.640277 | -1.495502 |
| 26            | 1             | 0           | -1.650275               | -1.116469 | -2.391424 |
| 27            | 1             | 0           | -0.120953               | -1.987301 | -2.186123 |

|    |    |   |           |           |           |
|----|----|---|-----------|-----------|-----------|
| 28 | 6  | 0 | -7.255319 | 4.066572  | 3.243249  |
| 29 | 6  | 0 | -6.038037 | 3.475856  | 3.559628  |
| 30 | 6  | 0 | -5.212606 | 3.021880  | 2.541246  |
| 31 | 6  | 0 | -5.600500 | 3.160691  | 1.207645  |
| 32 | 6  | 0 | -6.815051 | 3.774460  | 0.893706  |
| 33 | 6  | 0 | -7.641778 | 4.217084  | 1.913931  |
| 34 | 7  | 0 | -4.684559 | 2.739336  | 0.222818  |
| 35 | 6  | 0 | -4.926040 | 2.064194  | -0.932191 |
| 36 | 16 | 0 | -6.436673 | 1.497715  | -1.401145 |
| 37 | 7  | 0 | -3.777379 | 1.913312  | -1.652536 |
| 38 | 6  | 0 | -3.482894 | 1.125576  | -2.777299 |
| 39 | 6  | 0 | -2.362536 | 1.520297  | -3.522211 |
| 40 | 6  | 0 | -1.917507 | 0.754787  | -4.585658 |
| 41 | 6  | 0 | -2.600741 | -0.408582 | -4.928237 |
| 42 | 6  | 0 | -3.719561 | -0.800090 | -4.203646 |
| 43 | 6  | 0 | -4.161745 | -0.045597 | -3.124975 |
| 44 | 6  | 0 | -8.183137 | 4.511710  | 4.329837  |
| 45 | 9  | 0 | -8.836422 | 5.638262  | 4.004583  |
| 46 | 9  | 0 | -9.127904 | 3.590886  | 4.594017  |
| 47 | 9  | 0 | -7.542470 | 4.744194  | 5.484002  |
| 48 | 6  | 0 | -2.065785 | -1.286855 | -6.013165 |
| 49 | 9  | 0 | -1.139982 | -2.146243 | -5.544385 |
| 50 | 9  | 0 | -1.469469 | -0.584866 | -6.988145 |
| 51 | 9  | 0 | -3.021165 | -2.032310 | -6.585335 |
| 52 | 1  | 0 | -5.734150 | 3.368588  | 4.592968  |
| 53 | 1  | 0 | -4.263255 | 2.553729  | 2.774590  |
| 54 | 1  | 0 | -7.098706 | 3.914185  | -0.138688 |
| 55 | 1  | 0 | -8.580932 | 4.700490  | 1.673969  |
| 56 | 1  | 0 | -3.700984 | 2.865685  | 0.465127  |
| 57 | 1  | 0 | -2.971149 | 2.414474  | -1.280148 |
| 58 | 1  | 0 | -1.839874 | 2.432579  | -3.255835 |
| 59 | 1  | 0 | -1.046685 | 1.065051  | -5.149903 |
| 60 | 1  | 0 | -4.243141 | -1.711229 | -4.465623 |
| 61 | 1  | 0 | -5.013417 | -0.373637 | -2.551541 |

---



|    |    |   |           |           |           |
|----|----|---|-----------|-----------|-----------|
| 23 | 9  | 0 | -6.690523 | 1.780026  | -1.807758 |
| 24 | 9  | 0 | -6.648370 | 2.754666  | 0.107953  |
| 25 | 1  | 0 | 5.577049  | 0.783459  | 1.175481  |
| 26 | 1  | 0 | 3.171929  | 0.846458  | 1.760058  |
| 27 | 1  | 0 | 2.217002  | -1.165849 | -1.900580 |
| 28 | 1  | 0 | 4.612900  | -1.200192 | -2.504197 |
| 29 | 1  | 0 | 1.041733  | -0.291646 | 1.374402  |
| 30 | 1  | 0 | -0.937048 | -0.566128 | 1.225327  |
| 31 | 1  | 0 | -3.164816 | -1.579084 | 0.568640  |
| 32 | 1  | 0 | -5.523547 | -0.871057 | 0.277349  |
| 33 | 1  | 0 | -4.191855 | 3.054530  | -0.831566 |
| 34 | 1  | 0 | -1.842860 | 2.352989  | -0.508523 |
| 35 | 6  | 0 | 2.222484  | 0.225564  | 4.881706  |
| 36 | 8  | 0 | 0.863052  | -0.054437 | 5.319563  |
| 37 | 15 | 0 | -0.332476 | -0.061623 | 4.298387  |
| 38 | 8  | 0 | -0.916018 | 1.398054  | 4.319481  |
| 39 | 6  | 0 | -1.726382 | 1.909085  | 3.221477  |
| 40 | 6  | 0 | -3.106577 | 1.288269  | 3.226535  |
| 41 | 6  | 0 | 2.377483  | 1.669570  | 4.455612  |
| 42 | 8  | 0 | -1.449472 | -0.900041 | 5.076589  |
| 43 | 8  | 0 | -0.006758 | -0.592521 | 2.951249  |
| 44 | 6  | 0 | -1.312273 | -2.277379 | 5.232306  |
| 45 | 6  | 0 | -1.707663 | -3.118622 | 4.201556  |
| 46 | 6  | 0 | -1.609205 | -4.489825 | 4.387033  |
| 47 | 6  | 0 | -1.119410 | -4.990445 | 5.590248  |
| 48 | 6  | 0 | -0.723753 | -4.135266 | 6.612597  |
| 49 | 6  | 0 | -0.819973 | -2.761282 | 6.434229  |
| 50 | 6  | 0 | -0.975360 | -6.473236 | 5.754954  |
| 51 | 9  | 0 | -0.949920 | -6.841719 | 7.042356  |
| 52 | 9  | 0 | -1.978403 | -7.142616 | 5.168001  |
| 53 | 9  | 0 | 0.161343  | -6.928506 | 5.200302  |
| 54 | 1  | 0 | 2.468092  | -0.469776 | 4.077218  |
| 55 | 1  | 0 | 2.834565  | -0.005052 | 5.749752  |
| 56 | 1  | 0 | -1.765427 | 2.981372  | 3.395371  |
| 57 | 1  | 0 | -1.191817 | 1.719899  | 2.287943  |
| 58 | 1  | 0 | -3.706151 | 1.727100  | 2.425369  |
| 59 | 1  | 0 | -3.059739 | 0.209951  | 3.058327  |
| 60 | 1  | 0 | -3.601516 | 1.472086  | 4.180889  |
| 61 | 1  | 0 | 3.425546  | 1.865707  | 4.221889  |
| 62 | 1  | 0 | 2.068236  | 2.339764  | 5.258355  |
| 63 | 1  | 0 | 1.780584  | 1.891699  | 3.567355  |
| 64 | 1  | 0 | -2.088891 | -2.699877 | 3.278871  |
| 65 | 1  | 0 | -1.919795 | -5.167207 | 3.601406  |
| 66 | 1  | 0 | -0.348552 | -4.536299 | 7.545203  |
| 67 | 1  | 0 | -0.524201 | -2.066426 | 7.209329  |

-----

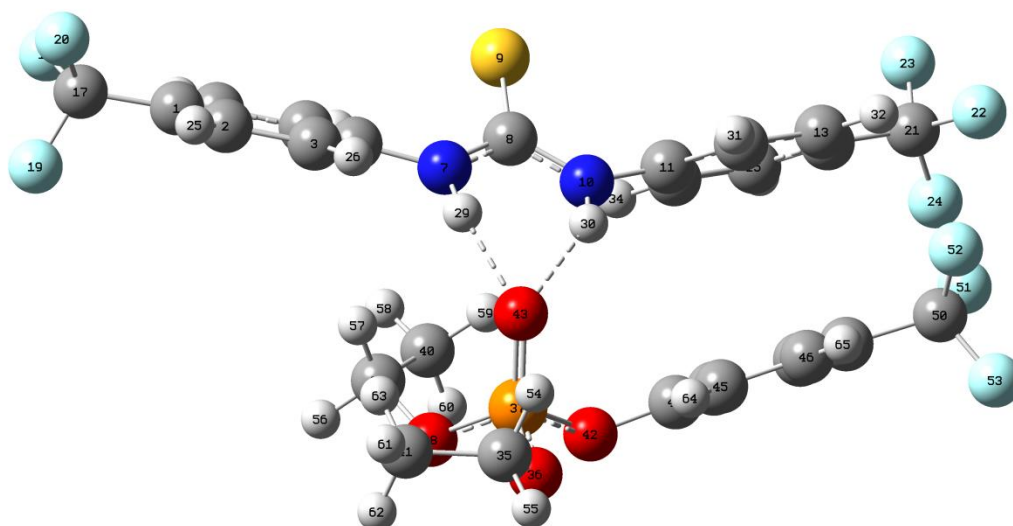

Figure S164: Output from the DFT modelling of **1:6** initiated with the P=O coordinated to the receptor through the formation of two hydrogen bonds, one to each oxygen atom. Total electronic energy (E(RM062X)): -3053.710781 Hartree. Binding mode 2 (see Table S26).

Table S26: Output from the DFT modelling of **1:6** initiated with the P=O coordinated to the receptor through the formation of two hydrogen bonds, one to each oxygen atom.

| Center Number | Atomic Number | Atomic Type | Coordinates (Angstroms) |           |           |
|---------------|---------------|-------------|-------------------------|-----------|-----------|
|               |               |             | X                       | Y         | Z         |
| 1             | 6             | 0           | 4.992622                | 1.637690  | -0.925855 |
| 2             | 6             | 0           | 5.042218                | 0.762561  | 0.155450  |
| 3             | 6             | 0           | 3.879662                | 0.154542  | 0.597959  |
| 4             | 6             | 0           | 2.659581                | 0.421331  | -0.032681 |
| 5             | 6             | 0           | 2.611748                | 1.316953  | -1.101849 |
| 6             | 6             | 0           | 3.781993                | 1.916235  | -1.548291 |
| 7             | 7             | 0           | 1.512934                | -0.171969 | 0.530631  |
| 8             | 6             | 0           | 0.386475                | -0.634256 | -0.071173 |
| 9             | 16            | 0           | 0.146788                | -0.709033 | -1.735393 |
| 10            | 7             | 0           | -0.529588               | -1.070776 | 0.834668  |
| 11            | 6             | 0           | -1.803056               | -1.616951 | 0.531740  |
| 12            | 6             | 0           | -2.116425               | -2.891682 | 0.985884  |
| 13            | 6             | 0           | -3.378452               | -3.425381 | 0.737575  |
| 14            | 6             | 0           | -4.310503               | -2.675728 | 0.037105  |
| 15            | 6             | 0           | -4.001104               | -1.391270 | -0.412725 |
| 16            | 6             | 0           | -2.750501               | -0.858576 | -0.159687 |
| 17            | 6             | 0           | 6.251977                | 2.314010  | -1.369126 |
| 18            | 9             | 0           | 6.144444                | 2.845335  | -2.593912 |
| 19            | 9             | 0           | 6.601180                | 3.316431  | -0.542201 |
| 20            | 9             | 0           | 7.294383                | 1.467983  | -1.392764 |
| 21            | 6             | 0           | -5.672294               | -3.221082 | -0.264728 |
| 22            | 9             | 0           | -5.879593               | -4.426750 | 0.275599  |
| 23            | 9             | 0           | -5.874838               | -3.344935 | -1.588691 |
| 24            | 9             | 0           | -6.644667               | -2.408630 | 0.185254  |
| 25            | 1             | 0           | 5.986004                | 0.546115  | 0.641053  |
| 26            | 1             | 0           | 3.908261                | -0.537659 | 1.431457  |
| 27            | 1             | 0           | 1.669885                | 1.546273  | -1.576242 |
| 28            | 1             | 0           | 3.745834                | 2.608576  | -2.379648 |
| 29            | 1             | 0           | 1.547232                | -0.281796 | 1.545055  |
| 30            | 1             | 0           | -0.238717               | -1.108129 | 1.810552  |

|    |    |   |           |           |           |
|----|----|---|-----------|-----------|-----------|
| 31 | 1  | 0 | -1.373845 | -3.466065 | 1.526666  |
| 32 | 1  | 0 | -3.628395 | -4.417455 | 1.089957  |
| 33 | 1  | 0 | -4.742688 | -0.808228 | -0.946245 |
| 34 | 1  | 0 | -2.497727 | 0.141826  | -0.485759 |
| 35 | 6  | 0 | 1.735967  | 0.157908  | 6.163268  |
| 36 | 8  | 0 | 0.499982  | 0.741478  | 5.652967  |
| 37 | 15 | 0 | 0.264374  | 0.889976  | 4.106488  |
| 38 | 8  | 0 | 0.748760  | 2.341092  | 3.749119  |
| 39 | 6  | 0 | 1.096173  | 2.703074  | 2.380986  |
| 40 | 6  | 0 | -0.089981 | 2.597285  | 1.446247  |
| 41 | 6  | 0 | 2.939468  | 1.008633  | 5.821524  |
| 42 | 8  | 0 | -1.327683 | 1.017165  | 3.987391  |
| 43 | 8  | 0 | 0.833241  | -0.201591 | 3.276540  |
| 44 | 6  | 0 | -2.182331 | -0.072476 | 3.918988  |
| 45 | 6  | 0 | -1.938721 | -1.243087 | 4.630168  |
| 46 | 6  | 0 | -2.860945 | -2.275588 | 4.548397  |
| 47 | 6  | 0 | -4.004368 | -2.126787 | 3.769832  |
| 48 | 6  | 0 | -4.233793 | -0.955370 | 3.058539  |
| 49 | 6  | 0 | -3.311835 | 0.080235  | 3.128209  |
| 50 | 6  | 0 | -4.998699 | -3.246117 | 3.740916  |
| 51 | 9  | 0 | -5.891450 | -3.112647 | 2.751590  |
| 52 | 9  | 0 | -4.402421 | -4.440206 | 3.578451  |
| 53 | 9  | 0 | -5.695754 | -3.327992 | 4.886274  |
| 54 | 1  | 0 | 1.822273  | -0.849561 | 5.754285  |
| 55 | 1  | 0 | 1.573900  | 0.098497  | 7.236242  |
| 56 | 1  | 0 | 1.453345  | 3.726419  | 2.461540  |
| 57 | 1  | 0 | 1.924515  | 2.066222  | 2.065251  |
| 58 | 1  | 0 | 0.218668  | 2.909278  | 0.446348  |
| 59 | 1  | 0 | -0.460406 | 1.571349  | 1.379330  |
| 60 | 1  | 0 | -0.902944 | 3.242768  | 1.780749  |
| 61 | 1  | 0 | 3.820385  | 0.591112  | 6.311311  |
| 62 | 1  | 0 | 2.797521  | 2.032497  | 6.169045  |
| 63 | 1  | 0 | 3.125845  | 1.020220  | 4.745204  |
| 64 | 1  | 0 | -1.059007 | -1.342805 | 5.253372  |
| 65 | 1  | 0 | -2.687279 | -3.195745 | 5.092926  |
| 66 | 1  | 0 | -5.116192 | -0.856567 | 2.438619  |
| 67 | 1  | 0 | -3.453545 | 1.002293  | 2.578881  |

---

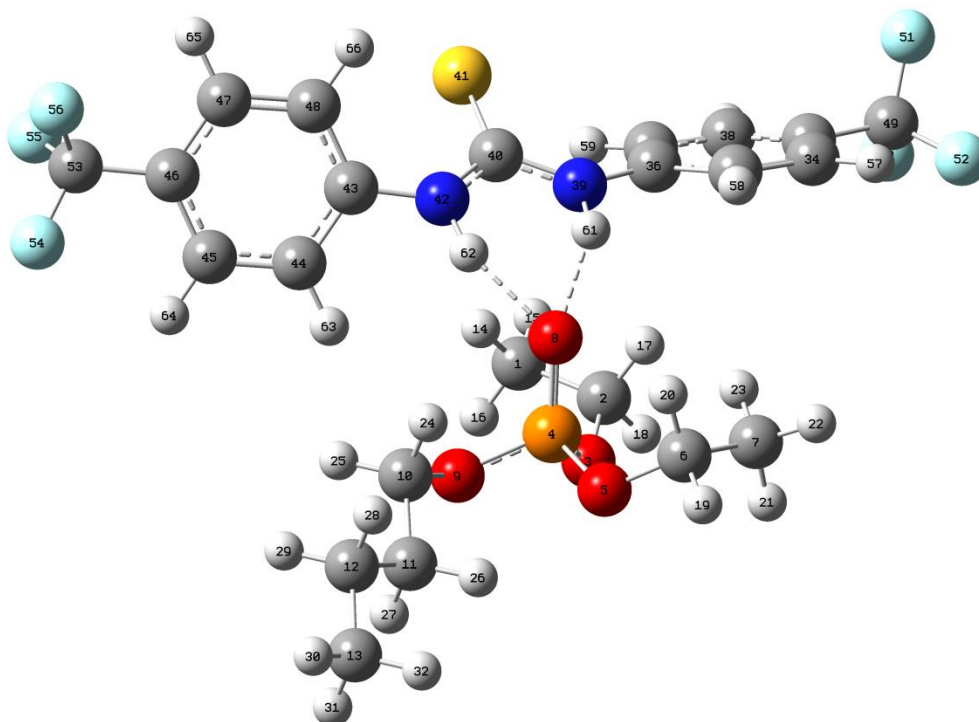

Figure S165: Output from the DFT modelling of **1:10** initiated with the P=O coordinated to the receptor through the formation of two hydrogen bonds. Total electronic energy (E(RM062X)): -2642.861038 Hartree. Binding mode 1 (see Table S27).

Table S27: Output from the DFT modelling of **1:10** initiated with the P=O coordinated to the receptor through the formation of two hydrogen bonds.

| Center Number | Atomic Number | Atomic Type | Coordinates (Angstroms) |           |          |
|---------------|---------------|-------------|-------------------------|-----------|----------|
|               |               |             | X                       | Y         | Z        |
| 1             | 6             | 0           | 0.783689                | -1.744052 | 2.833526 |
| 2             | 6             | 0           | 1.666485                | -0.769225 | 3.581599 |
| 3             | 8             | 0           | 0.940865                | -0.099152 | 4.645567 |
| 4             | 15            | 0           | -0.162826               | 0.990194  | 4.351733 |
| 5             | 8             | 0           | 0.041669                | 2.127624  | 5.428999 |
| 6             | 6             | 0           | 0.891341                | 3.270808  | 5.139843 |
| 7             | 6             | 0           | 2.333733                | 2.860190  | 4.929388 |
| 8             | 8             | 0           | -0.162798               | 1.497962  | 2.951251 |
| 9             | 8             | 0           | -1.490307               | 0.274644  | 4.813016 |
| 10            | 6             | 0           | -2.741004               | 1.014466  | 4.876049 |
| 11            | 6             | 0           | -3.046698               | 1.421377  | 6.302302 |
| 12            | 6             | 0           | -4.394440               | 2.135445  | 6.397013 |
| 13            | 6             | 0           | -4.725347               | 2.538906  | 7.831710 |
| 14            | 1             | 0           | -0.044786               | -1.230429 | 2.341359 |
| 15            | 1             | 0           | 1.372363                | -2.248710 | 2.064299 |
| 16            | 1             | 0           | 0.379351                | -2.494595 | 3.513703 |
| 17            | 1             | 0           | 2.088273                | -0.011604 | 2.918071 |
| 18            | 1             | 0           | 2.482020                | -1.276688 | 4.091404 |
| 19            | 1             | 0           | 0.780911                | 3.912619  | 6.010442 |
| 20            | 1             | 0           | 0.486005                | 3.778771  | 4.264013 |
| 21            | 1             | 0           | 2.695183                | 2.276272  | 5.776715 |
| 22            | 1             | 0           | 2.950806                | 3.754501  | 4.830746 |
| 23            | 1             | 0           | 2.449592                | 2.271336  | 4.016038 |

|    |    |   |           |           |           |
|----|----|---|-----------|-----------|-----------|
| 24 | 1  | 0 | -2.684585 | 1.881546  | 4.211294  |
| 25 | 1  | 0 | -3.499095 | 0.333414  | 4.489821  |
| 26 | 1  | 0 | -2.248795 | 2.072670  | 6.669337  |
| 27 | 1  | 0 | -3.054960 | 0.523661  | 6.927961  |
| 28 | 1  | 0 | -4.380660 | 3.024077  | 5.757810  |
| 29 | 1  | 0 | -5.180784 | 1.480913  | 6.007512  |
| 30 | 1  | 0 | -5.688354 | 3.049030  | 7.888243  |
| 31 | 1  | 0 | -4.769479 | 1.660555  | 8.480278  |
| 32 | 1  | 0 | -3.962295 | 3.211844  | 8.230424  |
| 33 | 6  | 0 | 5.129620  | 0.295450  | -0.056155 |
| 34 | 6  | 0 | 4.564523  | 1.477161  | 0.408962  |
| 35 | 6  | 0 | 3.188816  | 1.567956  | 0.550958  |
| 36 | 6  | 0 | 2.369639  | 0.480384  | 0.232195  |
| 37 | 6  | 0 | 2.944985  | -0.712622 | -0.214515 |
| 38 | 6  | 0 | 4.321346  | -0.794425 | -0.364197 |
| 39 | 7  | 0 | 0.995085  | 0.635650  | 0.491113  |
| 40 | 6  | 0 | -0.087818 | 0.083485  | -0.120341 |
| 41 | 16 | 0 | -0.030480 | -0.850396 | -1.517360 |
| 42 | 7  | 0 | -1.232252 | 0.379826  | 0.551981  |
| 43 | 6  | 0 | -2.548557 | -0.027969 | 0.245580  |
| 44 | 6  | 0 | -3.316534 | -0.556769 | 1.281823  |
| 45 | 6  | 0 | -4.639770 | -0.913558 | 1.059115  |
| 46 | 6  | 0 | -5.187558 | -0.746420 | -0.205966 |
| 47 | 6  | 0 | -4.425222 | -0.213022 | -1.243396 |
| 48 | 6  | 0 | -3.108821 | 0.155621  | -1.019747 |
| 49 | 6  | 0 | 6.607545  | 0.197726  | -0.268997 |
| 50 | 9  | 0 | 7.080465  | -1.021681 | 0.032240  |
| 51 | 9  | 0 | 6.948738  | 0.429023  | -1.549708 |
| 52 | 9  | 0 | 7.288380  | 1.081923  | 0.473575  |
| 53 | 6  | 0 | -6.595332 | -1.170289 | -0.488080 |
| 54 | 9  | 0 | -7.313626 | -1.338245 | 0.630158  |
| 55 | 9  | 0 | -6.643267 | -2.336074 | -1.157365 |
| 56 | 9  | 0 | -7.246353 | -0.274572 | -1.247488 |
| 57 | 1  | 0 | 5.191826  | 2.323101  | 0.659234  |
| 58 | 1  | 0 | 2.738289  | 2.486331  | 0.909493  |
| 59 | 1  | 0 | 2.324325  | -1.567651 | -0.432861 |
| 60 | 1  | 0 | 4.767968  | -1.721134 | -0.703628 |
| 61 | 1  | 0 | 0.785158  | 1.241722  | 1.284258  |
| 62 | 1  | 0 | -1.111153 | 0.813461  | 1.469398  |
| 63 | 1  | 0 | -2.868184 | -0.696548 | 2.259091  |
| 64 | 1  | 0 | -5.235471 | -1.322774 | 1.864780  |
| 65 | 1  | 0 | -4.867729 | -0.067284 | -2.221477 |
| 66 | 1  | 0 | -2.518311 | 0.593489  | -1.811404 |

---



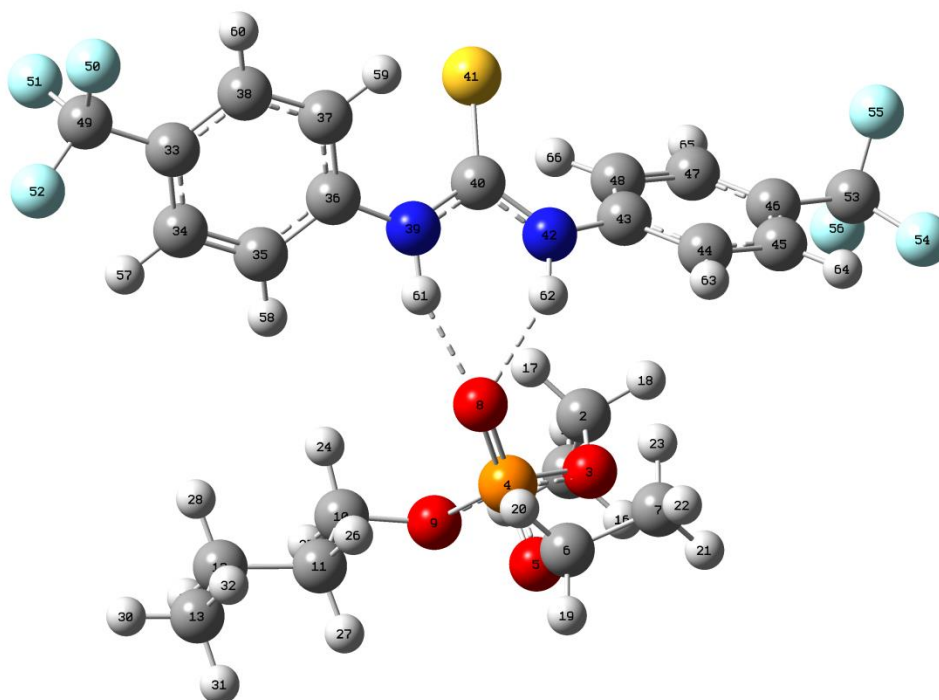

Figure S166: Output from the DFT modelling of **1:10** initiated with the P=O coordinated to the receptor through the formation of two hydrogen bonds, one to each oxygen atom. Total electronic energy (E(RM062X)): -2642.858794 Hartree. Binding mode 2 (see Table S28).

Table S28: Output from the DFT modelling of **1:10** initiated with the P=O coordinated to the receptor through the formation of two hydrogen bonds, one to each oxygen atom.

| Center Number | Atomic Number | Atomic Type | Coordinates (Angstroms) |           |          |
|---------------|---------------|-------------|-------------------------|-----------|----------|
|               |               |             | X                       | Y         | Z        |
| 1             | 6             | 0           | -2.857173               | 2.151301  | 4.196413 |
| 2             | 6             | 0           | -2.388341               | 1.008785  | 3.325136 |
| 3             | 8             | 0           | -1.896175               | -0.082668 | 4.154667 |
| 4             | 15            | 0           | -0.348864               | -0.281481 | 4.396444 |
| 5             | 8             | 0           | -0.294138               | -1.331016 | 5.572503 |
| 6             | 6             | 0           | 0.001780                | -2.731396 | 5.323662 |
| 7             | 6             | 0           | -1.161381               | -3.424292 | 4.648857 |
| 8             | 8             | 0           | 0.434508                | -0.684337 | 3.196147 |
| 9             | 8             | 0           | 0.102591                | 1.092932  | 5.032003 |
| 10            | 6             | 0           | 1.491017                | 1.511290  | 4.995600 |
| 11            | 6             | 0           | 2.400296                | 0.560745  | 5.750899 |
| 12            | 6             | 0           | 3.827421                | 1.101959  | 5.828796 |
| 13            | 6             | 0           | 4.757687                | 0.148954  | 6.574981 |
| 14            | 1             | 0           | -2.027382               | 2.565993  | 4.768607 |
| 15            | 1             | 0           | -3.279475               | 2.936053  | 3.566157 |
| 16            | 1             | 0           | -3.629309               | 1.805790  | 4.884914 |
| 17            | 1             | 0           | -1.600762               | 1.318948  | 2.632038 |
| 18            | 1             | 0           | -3.205127               | 0.579980  | 2.745481 |
| 19            | 1             | 0           | 0.199707                | -3.142968 | 6.310464 |
| 20            | 1             | 0           | 0.909783                | -2.787833 | 4.721690 |
| 21            | 1             | 0           | -2.071731               | -3.303866 | 5.237344 |
| 22            | 1             | 0           | -0.944007               | -4.489183 | 4.552547 |
| 23            | 1             | 0           | -1.329028               | -3.019577 | 3.648782 |
| 24            | 1             | 0           | 1.789741                | 1.603332  | 3.949238 |
| 25            | 1             | 0           | 1.488322                | 2.500170  | 5.451058 |

|    |    |   |           |           |           |
|----|----|---|-----------|-----------|-----------|
| 26 | 1  | 0 | 2.408782  | -0.415082 | 5.251802  |
| 27 | 1  | 0 | 1.999766  | 0.410079  | 6.758106  |
| 28 | 1  | 0 | 4.209441  | 1.272164  | 4.817010  |
| 29 | 1  | 0 | 3.817000  | 2.075642  | 6.328434  |
| 30 | 1  | 0 | 5.772441  | 0.546630  | 6.627452  |
| 31 | 1  | 0 | 4.405267  | -0.014884 | 7.596237  |
| 32 | 1  | 0 | 4.800400  | -0.821749 | 6.075026  |
| 33 | 6  | 0 | 5.518967  | 0.214417  | -0.475976 |
| 34 | 6  | 0 | 5.046060  | 0.669086  | 0.750491  |
| 35 | 6  | 0 | 3.704139  | 0.524162  | 1.062371  |
| 36 | 6  | 0 | 2.827496  | -0.077518 | 0.155321  |
| 37 | 6  | 0 | 3.312426  | -0.553444 | -1.064808 |
| 38 | 6  | 0 | 4.654319  | -0.396521 | -1.378443 |
| 39 | 7  | 0 | 1.494672  | -0.247296 | 0.571323  |
| 40 | 6  | 0 | 0.348281  | -0.173472 | -0.157734 |
| 41 | 16 | 0 | 0.254019  | 0.318207  | -1.764091 |
| 42 | 7  | 0 | -0.725460 | -0.556212 | 0.583515  |
| 43 | 6  | 0 | -2.099225 | -0.429565 | 0.296555  |
| 44 | 6  | 0 | -2.937762 | -1.460647 | 0.717196  |
| 45 | 6  | 0 | -4.315224 | -1.342065 | 0.581378  |
| 46 | 6  | 0 | -4.849717 | -0.192670 | 0.016160  |
| 47 | 6  | 0 | -4.014750 | 0.839480  | -0.410450 |
| 48 | 6  | 0 | -2.642388 | 0.728715  | -0.267134 |
| 49 | 6  | 0 | 6.954652  | 0.425656  | -0.839737 |
| 50 | 9  | 0 | 7.400007  | -0.493722 | -1.708411 |
| 51 | 9  | 0 | 7.158057  | 1.624537  | -1.416423 |
| 52 | 9  | 0 | 7.759733  | 0.381580  | 0.232859  |
| 53 | 6  | 0 | -6.327661 | -0.038452 | -0.163667 |
| 54 | 9  | 0 | -7.022896 | -1.014237 | 0.433501  |
| 55 | 9  | 0 | -6.677902 | -0.046812 | -1.461775 |
| 56 | 9  | 0 | -6.772011 | 1.127233  | 0.335790  |
| 57 | 1  | 0 | 5.720526  | 1.133154  | 1.459340  |
| 58 | 1  | 0 | 3.325036  | 0.879248  | 2.013026  |
| 59 | 1  | 0 | 2.648568  | -1.052929 | -1.753769 |
| 60 | 1  | 0 | 5.031698  | -0.770792 | -2.321885 |
| 61 | 1  | 0 | 1.363151  | -0.342306 | 1.580039  |
| 62 | 1  | 0 | -0.511036 | -0.954200 | 1.496876  |
| 63 | 1  | 0 | -2.507568 | -2.353322 | 1.154963  |
| 64 | 1  | 0 | -4.963972 | -2.141596 | 0.914305  |
| 65 | 1  | 0 | -4.440352 | 1.740971  | -0.835529 |
| 66 | 1  | 0 | -1.993286 | 1.538685  | -0.566539 |

---

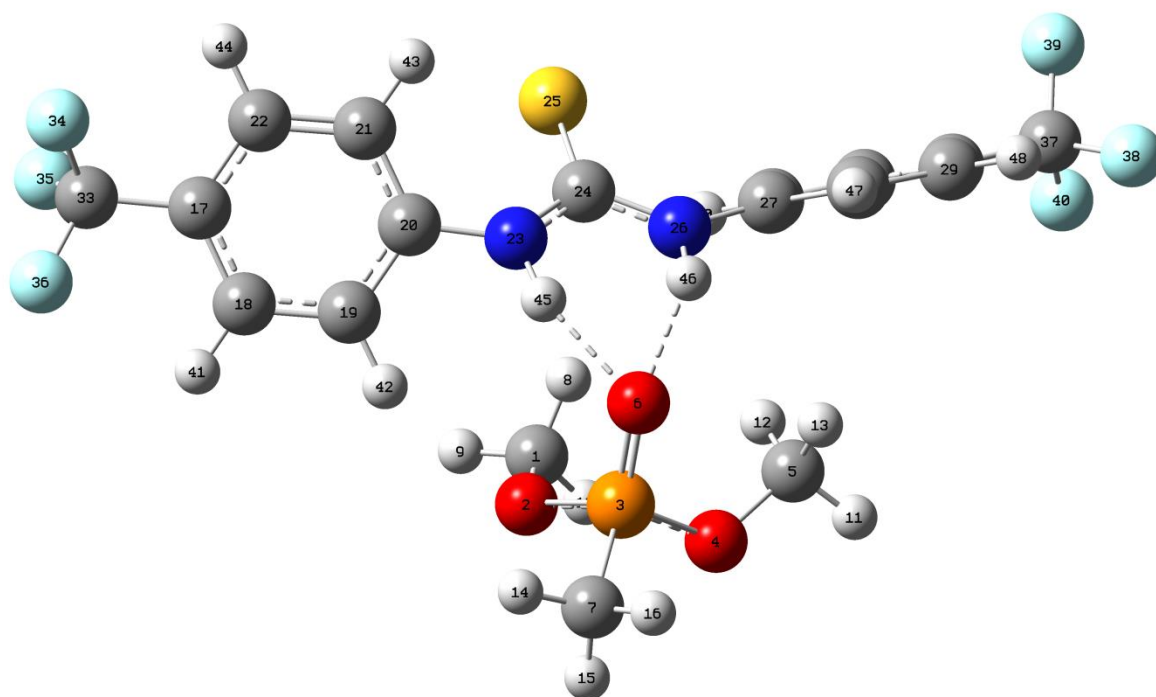

Figure S167: Output from the DFT modelling of **1:11** initiated with the P=O coordinated to the receptor through the formation of two hydrogen bonds. Total electronic energy ( $E(\text{RM062X})$ ): -2371.09972 Hartree. Binding mode 1 (see Table S29).

Table S29: Output from the DFT modelling of **1:11** initiated with the P=O coordinated to the receptor through the formation of two hydrogen bonds.

| Center Number | Atomic Number | Atomic Type | Coordinates (Angstroms) |           |           |
|---------------|---------------|-------------|-------------------------|-----------|-----------|
|               |               |             | X                       | Y         | Z         |
| 1             | 6             | 0           | 0.866223                | 0.760742  | 2.191203  |
| 2             | 8             | 0           | 1.660222                | -0.191590 | 1.458795  |
| 3             | 15            | 0           | 1.037399                | -0.920706 | 0.178258  |
| 4             | 8             | 0           | -0.393671               | -1.449270 | 0.646278  |
| 5             | 6             | 0           | -1.611142               | -0.792775 | 0.245090  |
| 6             | 8             | 0           | 0.946134                | -0.019542 | -1.012065 |
| 7             | 6             | 0           | 2.047396                | -2.371042 | 0.000503  |
| 8             | 1             | 0           | 0.414184                | 1.490090  | 1.514204  |
| 9             | 1             | 0           | 1.541665                | 1.270159  | 2.872802  |
| 10            | 1             | 0           | 0.090808                | 0.236652  | 2.750211  |
| 11            | 1             | 0           | -2.422092               | -1.451462 | 0.541756  |
| 12            | 1             | 0           | -1.711119               | 0.167297  | 0.755125  |
| 13            | 1             | 0           | -1.623945               | -0.645606 | -0.835227 |
| 14            | 1             | 0           | 3.081784                | -2.065872 | -0.155271 |
| 15            | 1             | 0           | 1.974099                | -2.981058 | 0.899599  |
| 16            | 1             | 0           | 1.698221                | -2.936520 | -0.862585 |
| 17            | 6             | 0           | 5.355448                | 4.274899  | 0.511941  |
| 18            | 6             | 0           | 4.975829                | 3.000650  | 0.915010  |
| 19            | 6             | 0           | 3.725998                | 2.513912  | 0.557812  |
| 20            | 6             | 0           | 2.861264                | 3.299136  | -0.205080 |
| 21            | 6             | 0           | 3.254871                | 4.570219  | -0.626650 |
| 22            | 6             | 0           | 4.498609                | 5.057668  | -0.258031 |
| 23            | 7             | 0           | 1.629335                | 2.724511  | -0.586961 |
| 24            | 6             | 0           | 0.388167                | 3.272481  | -0.505315 |
| 25            | 16            | 0           | 0.069510                | 4.829647  | 0.046633  |

|    |   |   |           |          |           |
|----|---|---|-----------|----------|-----------|
| 26 | 7 | 0 | -0.570372 | 2.393629 | -0.906115 |
| 27 | 6 | 0 | -1.973564 | 2.557406 | -0.898933 |
| 28 | 6 | 0 | -2.682058 | 2.118500 | -2.016262 |
| 29 | 6 | 0 | -4.069813 | 2.174501 | -2.029061 |
| 30 | 6 | 0 | -4.744675 | 2.675660 | -0.924063 |
| 31 | 6 | 0 | -4.041376 | 3.107683 | 0.198430  |
| 32 | 6 | 0 | -2.657981 | 3.041514 | 0.218739  |
| 33 | 6 | 0 | 6.675067  | 4.839199 | 0.936911  |
| 34 | 9 | 0 | 7.235772  | 5.589091 | -0.024706 |
| 35 | 9 | 0 | 6.557378  | 5.635017 | 2.015289  |
| 36 | 9 | 0 | 7.557997  | 3.884174 | 1.260725  |
| 37 | 6 | 0 | -6.237268 | 2.792370 | -0.932198 |
| 38 | 9 | 0 | -6.804810 | 2.032417 | -1.878059 |
| 39 | 9 | 0 | -6.640195 | 4.055590 | -1.157444 |
| 40 | 9 | 0 | -6.774726 | 2.430471 | 0.243711  |
| 41 | 1 | 0 | 5.647517  | 2.391037 | 1.505629  |
| 42 | 1 | 0 | 3.412311  | 1.523947 | 0.871267  |
| 43 | 1 | 0 | 2.595469  | 5.160731 | -1.245549 |
| 44 | 1 | 0 | 4.811934  | 6.040845 | -0.587385 |
| 45 | 1 | 0 | 1.658989  | 1.723822 | -0.794993 |
| 46 | 1 | 0 | -0.234724 | 1.507450 | -1.284886 |
| 47 | 1 | 0 | -2.142338 | 1.736053 | -2.874386 |
| 48 | 1 | 0 | -4.618743 | 1.831644 | -2.896467 |
| 49 | 1 | 0 | -4.576664 | 3.474905 | 1.065733  |
| 50 | 1 | 0 | -2.107492 | 3.349342 | 1.096036  |

---

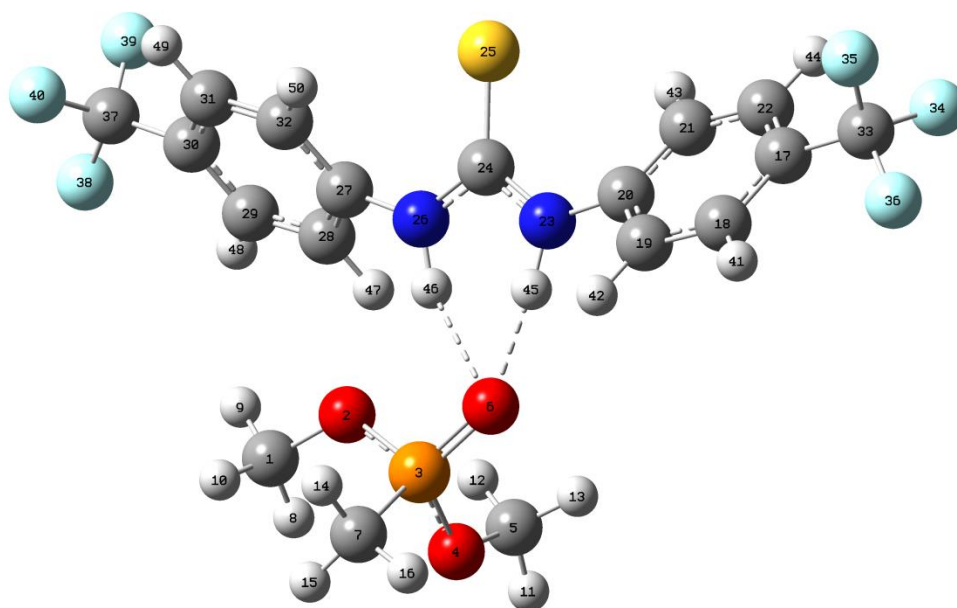

Figure S168: Output from the DFT modelling of **1:11** initiated with the P=O coordinated to the receptor through the formation of two hydrogen bonds, one to each oxygen atom. Total electronic energy (E(RM062X)): -2371.098193 Hartree. Binding mode 2 (see Table S30).

Table S30: Output from the DFT modelling of **1:11** initiated with the P=O coordinated to the receptor through the formation of two hydrogen bonds, one to each oxygen atom.

| Center Number | Atomic Number | Atomic Type | Coordinates (Angstroms) |           |           |
|---------------|---------------|-------------|-------------------------|-----------|-----------|
|               |               |             | X                       | Y         | Z         |
| 1             | 6             | 0           | -2.369719               | -0.788938 | 0.859147  |
| 2             | 8             | 0           | -1.156091               | -0.033390 | 0.699994  |
| 3             | 15            | 0           | 0.287788                | -0.721886 | 0.820974  |
| 4             | 8             | 0           | 0.276706                | -1.928487 | -0.218636 |
| 5             | 6             | 0           | 0.264422                | -1.638195 | -1.630757 |
| 6             | 8             | 0           | 1.298658                | 0.332928  | 0.541949  |
| 7             | 6             | 0           | 0.396124                | -1.551272 | 2.392275  |
| 8             | 1             | 0           | -2.349179               | -1.678517 | 0.227845  |
| 9             | 1             | 0           | -3.180448               | -0.132959 | 0.553231  |
| 10            | 1             | 0           | -2.498962               | -1.069582 | 1.904932  |
| 11            | 1             | 0           | 0.221715                | -2.596552 | -2.139063 |
| 12            | 1             | 0           | -0.614767               | -1.042524 | -1.883362 |
| 13            | 1             | 0           | 1.172457                | -1.103126 | -1.906593 |
| 14            | 1             | 0           | 0.266010                | -0.816301 | 3.186300  |
| 15            | 1             | 0           | -0.370952               | -2.321339 | 2.471707  |
| 16            | 1             | 0           | 1.379417                | -2.011997 | 2.481038  |
| 17            | 6             | 0           | 5.731584                | 4.412201  | -0.229731 |
| 18            | 6             | 0           | 5.382645                | 3.424570  | 0.683964  |
| 19            | 6             | 0           | 4.061727                | 3.012145  | 0.774670  |
| 20            | 6             | 0           | 3.086547                | 3.583149  | -0.046073 |
| 21            | 6             | 0           | 3.447279                | 4.557428  | -0.980083 |
| 22            | 6             | 0           | 4.766721                | 4.974141  | -1.061132 |
| 23            | 7             | 0           | 1.779945                | 3.069075  | 0.059537  |
| 24            | 6             | 0           | 0.595999                | 3.730588  | 0.022072  |
| 25            | 16            | 0           | 0.432444                | 5.403792  | -0.109274 |
| 26            | 7             | 0           | -0.454154               | 2.870214  | 0.108106  |

|    |   |   |           |          |           |
|----|---|---|-----------|----------|-----------|
| 27 | 6 | 0 | -1.834183 | 3.159083 | 0.134064  |
| 28 | 6 | 0 | -2.672668 | 2.366623 | -0.650801 |
| 29 | 6 | 0 | -4.046532 | 2.560944 | -0.621910 |
| 30 | 6 | 0 | -4.581108 | 3.552382 | 0.192033  |
| 31 | 6 | 0 | -3.749338 | 4.339313 | 0.984394  |
| 32 | 6 | 0 | -2.377907 | 4.139934 | 0.965445  |
| 33 | 6 | 0 | 7.140550  | 4.910695 | -0.298028 |
| 34 | 9 | 0 | 7.502096  | 5.234175 | -1.549477 |
| 35 | 9 | 0 | 7.319923  | 6.018772 | 0.444469  |
| 36 | 9 | 0 | 8.023740  | 4.006091 | 0.148337  |
| 37 | 6 | 0 | -6.054567 | 3.814894 | 0.194589  |
| 38 | 9 | 0 | -6.761854 | 2.758379 | -0.229782 |
| 39 | 9 | 0 | -6.383508 | 4.844303 | -0.606730 |
| 40 | 9 | 0 | -6.507998 | 4.130678 | 1.417824  |
| 41 | 1 | 0 | 6.135145  | 2.979372 | 1.322252  |
| 42 | 1 | 0 | 3.775685  | 2.245724 | 1.485347  |
| 43 | 1 | 0 | 2.702872  | 4.972425 | -1.642417 |
| 44 | 1 | 0 | 5.049725  | 5.724530 | -1.789197 |
| 45 | 1 | 0 | 1.727166  | 2.072298 | 0.290844  |
| 46 | 1 | 0 | -0.237330 | 1.878958 | 0.053818  |
| 47 | 1 | 0 | -2.240294 | 1.597829 | -1.280442 |
| 48 | 1 | 0 | -4.694996 | 1.943918 | -1.230930 |
| 49 | 1 | 0 | -4.175179 | 5.094667 | 1.633563  |
| 50 | 1 | 0 | -1.730626 | 4.729124 | 1.597944  |

---

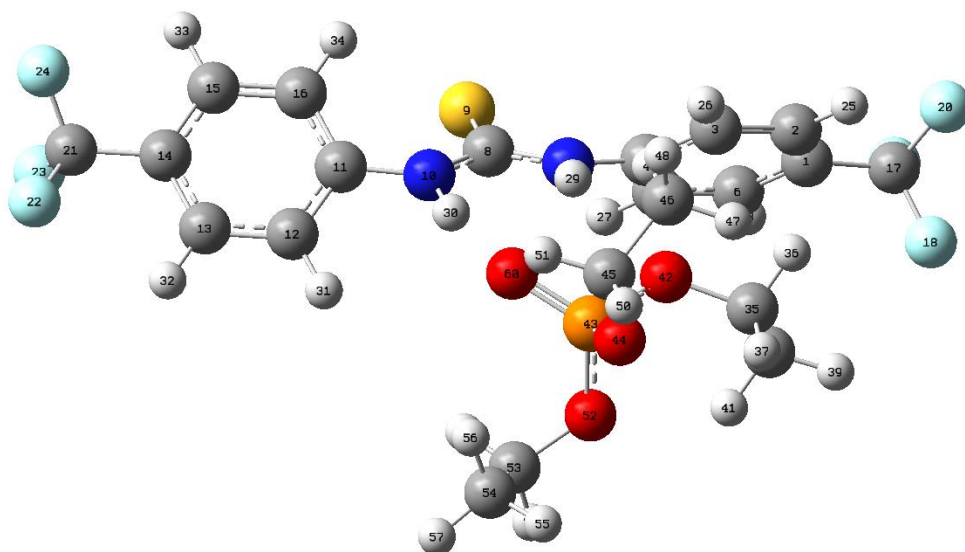

Figure S169: Output from the DFT modelling of **1:13** initiated with the P=O coordinated to the receptor.

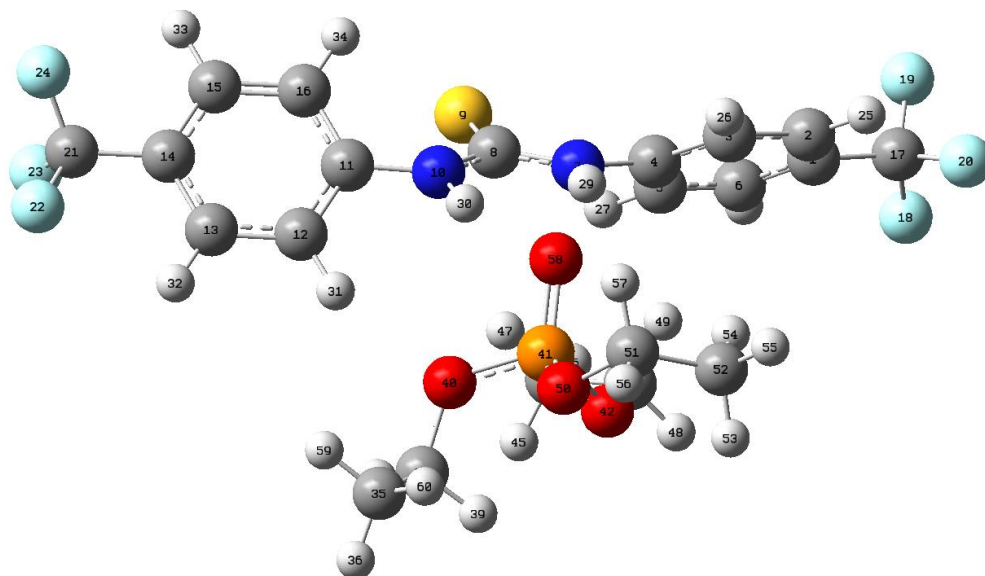

Figure S170: Output from the DFT modelling of **1:13** initiated with the P=O coordinated to the receptor.

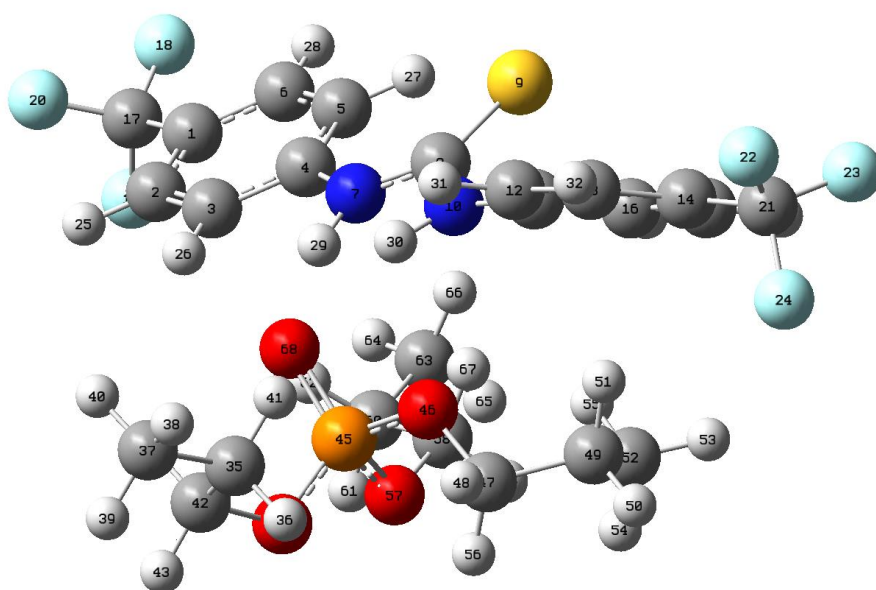

Figure S171: Output from the DFT modelling of **1:14** initiated with the P=O coordinated to the receptor.

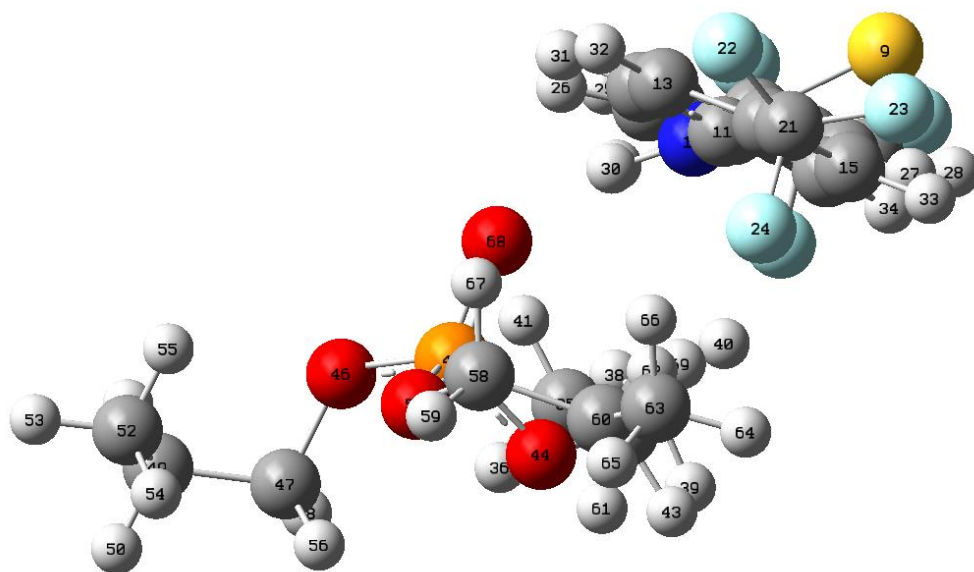

Figure S172: Output from the DFT modelling of **1:14** initiated with the P=O coordinated to the receptor.

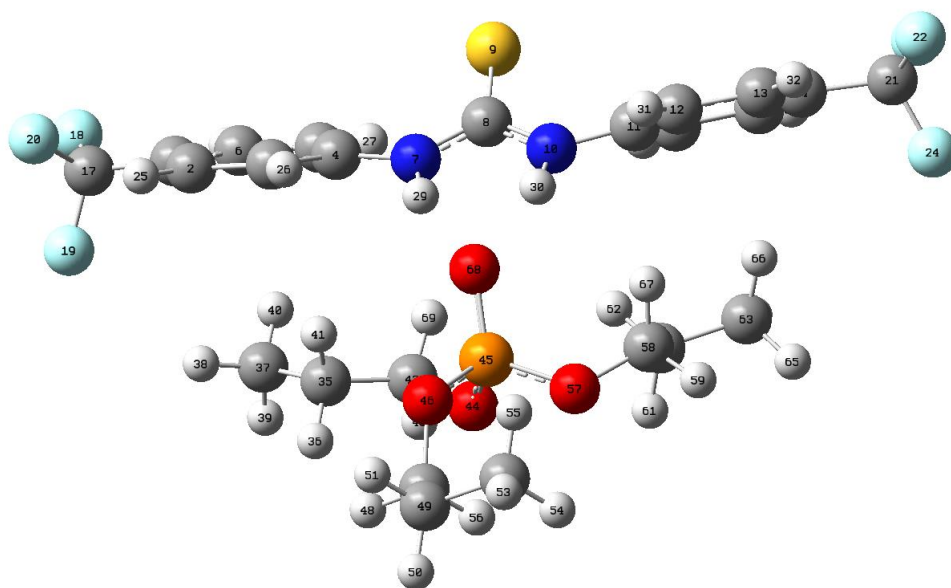

Figure S173: Output from the DFT modelling of **1:14** initiated with the P=O coordinated to the receptor.



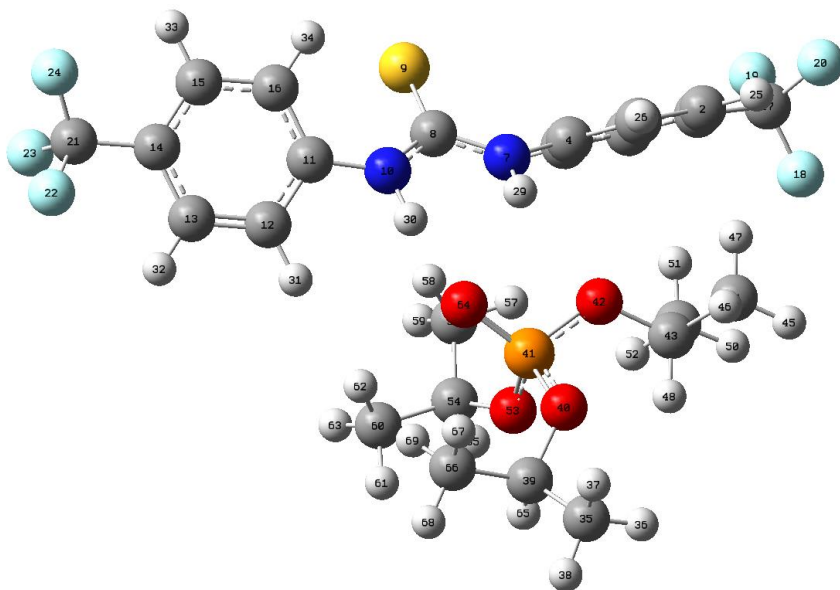

Figure S174: Output from the DFT modelling of **1:15** initiated with the P=O coordinated to the receptor.

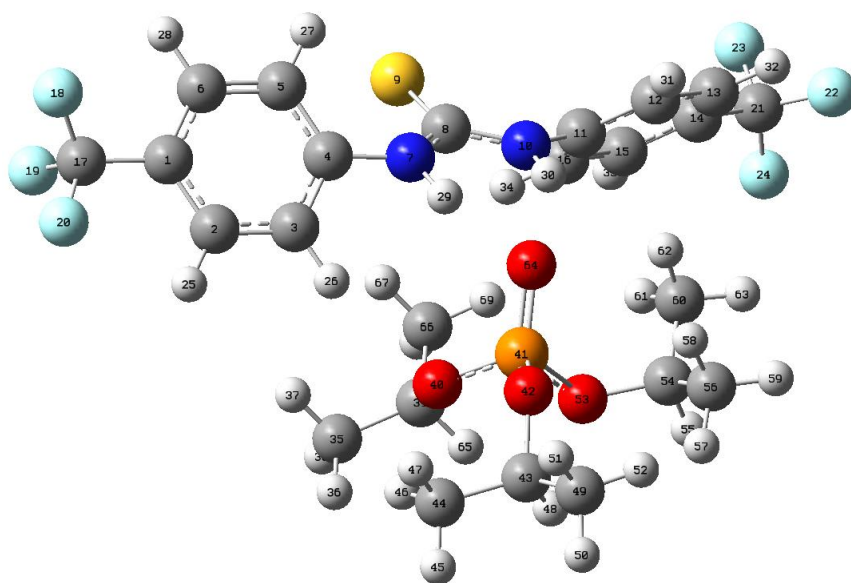

Figure S175: Output from the DFT modelling of **1:11** initiated with the P=O coordinated to the receptor.

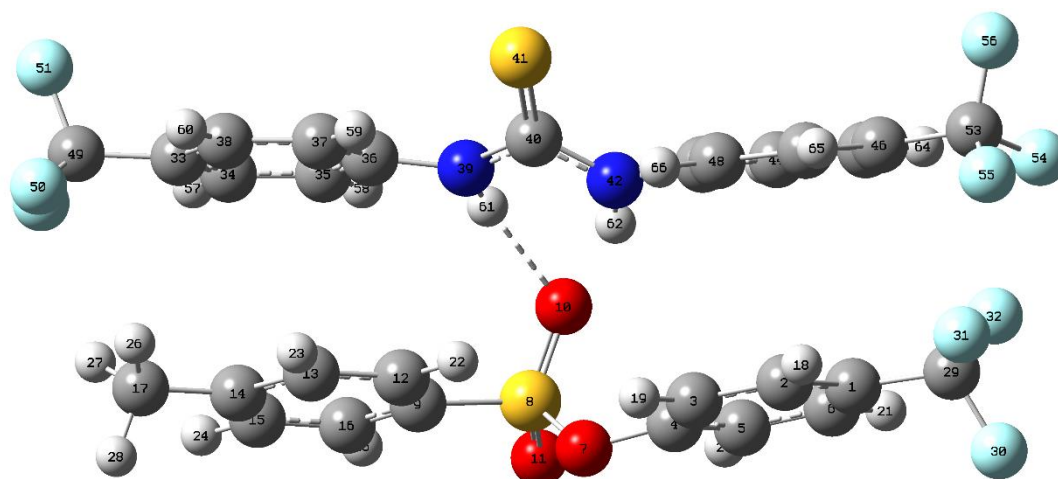

Figure S176: Output from the DFT modelling of **1:16** initiated with the S=O coordinated to the receptor through the formation of one hydrogen bonds, one to each oxygen atom. Total electronic energy (E(RM062X)): -3147.670507 Hartree. Binding mode 1 (see Table S31).

Table S31: Output from the DFT modelling of **1:16** initiated with the S=O coordinated to the receptor through the formation of one hydrogen bond.

| Center Number | Atomic Number | Atomic Type | Coordinates (Angstroms) |           |           |
|---------------|---------------|-------------|-------------------------|-----------|-----------|
|               |               |             | X                       | Y         | Z         |
| 1             | 6             | 0           | -4.433401               | -0.508940 | -0.408878 |
| 2             | 6             | 0           | -3.562075               | -1.504940 | -0.828731 |
| 3             | 6             | 0           | -2.224738               | -1.449718 | -0.450896 |
| 4             | 6             | 0           | -1.804193               | -0.408651 | 0.358886  |
| 5             | 6             | 0           | -2.661505               | 0.599061  | 0.782790  |
| 6             | 6             | 0           | -3.987835               | 0.546816  | 0.383983  |
| 7             | 8             | 0           | -0.476041               | -0.453156 | 0.797376  |
| 8             | 16            | 0           | 0.479822                | 0.848991  | 0.629275  |
| 9             | 6             | 0           | 2.026510                | 0.040290  | 0.428088  |
| 10            | 8             | 0           | 0.078833                | 1.510382  | -0.609694 |
| 11            | 8             | 0           | 0.452864                | 1.630526  | 1.839102  |
| 12            | 6             | 0           | 2.124078                | -1.057062 | -0.421911 |
| 13            | 6             | 0           | 3.377665                | -1.604860 | -0.647198 |
| 14            | 6             | 0           | 4.519932                | -1.060525 | -0.053221 |
| 15            | 6             | 0           | 4.381788                | 0.039480  | 0.798606  |
| 16            | 6             | 0           | 3.138209                | 0.598927  | 1.051097  |
| 17            | 6             | 0           | 5.874562                | -1.661127 | -0.305668 |
| 18            | 1             | 0           | -3.915811               | -2.314598 | -1.453965 |
| 19            | 1             | 0           | -1.517535               | -2.207752 | -0.762873 |
| 20            | 1             | 0           | -2.302287               | 1.395179  | 1.423207  |
| 21            | 1             | 0           | -4.676632               | 1.320628  | 0.700110  |
| 22            | 1             | 0           | 1.243035                | -1.476448 | -0.893122 |
| 23            | 1             | 0           | 3.472312                | -2.459726 | -1.306413 |
| 24            | 1             | 0           | 5.260716                | 0.466685  | 1.267421  |
| 25            | 1             | 0           | 3.028563                | 1.447820  | 1.714300  |
| 26            | 1             | 0           | 5.885233                | -2.228769 | -1.236366 |
| 27            | 1             | 0           | 6.639968                | -0.885460 | -0.358173 |
| 28            | 1             | 0           | 6.142340                | -2.338709 | 0.509631  |
| 29            | 6             | 0           | -5.892706               | -0.576308 | -0.746949 |

|    |    |   |           |           |           |
|----|----|---|-----------|-----------|-----------|
| 30 | 9  | 0 | -6.630723 | -0.916872 | 0.322864  |
| 31 | 9  | 0 | -6.158493 | -1.475614 | -1.702807 |
| 32 | 9  | 0 | -6.363877 | 0.607934  | -1.167175 |
| 33 | 6  | 0 | 5.546855  | 0.137987  | -3.218494 |
| 34 | 6  | 0 | 4.961285  | 1.210135  | -2.553873 |
| 35 | 6  | 0 | 3.584542  | 1.354581  | -2.568803 |
| 36 | 6  | 0 | 2.778829  | 0.429321  | -3.241700 |
| 37 | 6  | 0 | 3.371440  | -0.649241 | -3.904622 |
| 38 | 6  | 0 | 4.751937  | -0.783203 | -3.892917 |
| 39 | 7  | 0 | 1.393753  | 0.598652  | -3.085288 |
| 40 | 6  | 0 | 0.333941  | 0.122794  | -3.800150 |
| 41 | 16 | 0 | 0.440105  | -0.545656 | -5.336487 |
| 42 | 7  | 0 | -0.832699 | 0.312055  | -3.126760 |
| 43 | 6  | 0 | -2.153895 | 0.051426  | -3.552952 |
| 44 | 6  | 0 | -3.116834 | 1.023058  | -3.285420 |
| 45 | 6  | 0 | -4.447964 | 0.791117  | -3.603318 |
| 46 | 6  | 0 | -4.811156 | -0.415580 | -4.187838 |
| 47 | 6  | 0 | -3.853776 | -1.393115 | -4.446456 |
| 48 | 6  | 0 | -2.525292 | -1.167720 | -4.122280 |
| 49 | 6  | 0 | 7.034918  | -0.004187 | -3.256610 |
| 50 | 9  | 0 | 7.420543  | -1.290943 | -3.244952 |
| 51 | 9  | 0 | 7.570663  | 0.539650  | -4.363427 |
| 52 | 9  | 0 | 7.630104  | 0.594925  | -2.212395 |
| 53 | 6  | 0 | -6.231125 | -0.658011 | -4.597482 |
| 54 | 9  | 0 | -7.098598 | 0.093060  | -3.906901 |
| 55 | 9  | 0 | -6.592514 | -1.939625 | -4.434725 |
| 56 | 9  | 0 | -6.428505 | -0.373214 | -5.898531 |
| 57 | 1  | 0 | 5.573821  | 1.924531  | -2.018064 |
| 58 | 1  | 0 | 3.122325  | 2.182438  | -2.042312 |
| 59 | 1  | 0 | 2.762437  | -1.387157 | -4.401864 |
| 60 | 1  | 0 | 5.209014  | -1.627157 | -4.395675 |
| 61 | 1  | 0 | 1.149647  | 1.156400  | -2.271928 |
| 62 | 1  | 0 | -0.772261 | 0.815863  | -2.245463 |
| 63 | 1  | 0 | -2.819927 | 1.959227  | -2.826820 |
| 64 | 1  | 0 | -5.196572 | 1.543236  | -3.390731 |
| 65 | 1  | 0 | -4.149780 | -2.339848 | -4.881608 |
| 66 | 1  | 0 | -1.781974 | -1.932789 | -4.291888 |

---

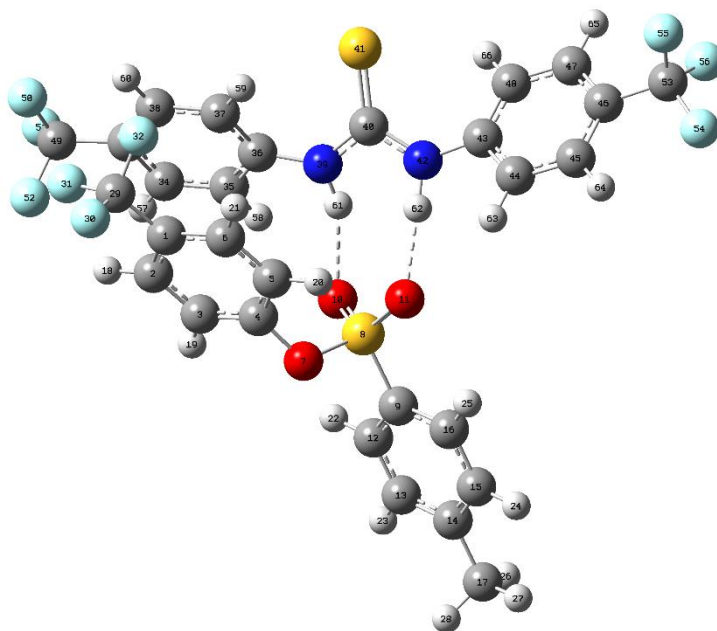

Figure S177: Output from the DFT modelling of **1:16** initiated with the O=S=O coordinated to the receptor through the formation of two hydrogen bonds, one to each oxygen atom. Total electronic energy (E(RM062X)): -3147.665792 Hartree. Binding mode 2 (see Table S32).

Table S32: Output from the DFT modelling of **1:16** initiated with the O=S=O coordinated to the receptor through the formation of two hydrogen bonds, one to each oxygen atom.

| Center Number | Atomic Number | Atomic Type | Coordinates (Angstroms) |           |           |
|---------------|---------------|-------------|-------------------------|-----------|-----------|
|               |               |             | X                       | Y         | Z         |
| 1             | 6             | 0           | -3.476662               | -0.557210 | -1.547362 |
| 2             | 6             | 0           | -2.537005               | -1.570726 | -1.683480 |
| 3             | 6             | 0           | -1.328520               | -1.476972 | -1.001966 |
| 4             | 6             | 0           | -1.107014               | -0.376490 | -0.192908 |
| 5             | 6             | 0           | -2.030187               | 0.652439  | -0.055782 |
| 6             | 6             | 0           | -3.228386               | 0.555999  | -0.746761 |
| 7             | 8             | 0           | 0.078073                | -0.343983 | 0.559844  |
| 8             | 16            | 0           | 1.249059                | 0.651773  | 0.041761  |
| 9             | 6             | 0           | 2.538734                | 0.181329  | 1.126710  |
| 10            | 8             | 0           | 1.550375                | 0.303676  | -1.336124 |
| 11            | 8             | 0           | 0.827365                | 2.018973  | 0.297624  |
| 12            | 6             | 0           | 3.293729                | -0.948301 | 0.819529  |
| 13            | 6             | 0           | 4.304574                | -1.313983 | 1.691337  |
| 14            | 6             | 0           | 4.562354                | -0.572235 | 2.851303  |
| 15            | 6             | 0           | 3.782703                | 0.553099  | 3.124338  |
| 16            | 6             | 0           | 2.761390                | 0.941401  | 2.267536  |
| 17            | 6             | 0           | 5.676277                | -0.984652 | 3.772640  |
| 18            | 1             | 0           | -2.737208               | -2.420177 | -2.324264 |
| 19            | 1             | 0           | -0.569734               | -2.244379 | -1.084723 |
| 20            | 1             | 0           | -1.812505               | 1.495283  | 0.587137  |
| 21            | 1             | 0           | -3.969526               | 1.340944  | -0.658565 |
| 22            | 1             | 0           | 3.098657                | -1.515746 | -0.082125 |
| 23            | 1             | 0           | 4.907239                | -2.187504 | 1.470978  |
| 24            | 1             | 0           | 3.975864                | 1.135157  | 4.017388  |
| 25            | 1             | 0           | 2.157969                | 1.816545  | 2.472517  |
| 26            | 1             | 0           | 6.641728                | -0.856510 | 3.277414  |
| 27            | 1             | 0           | 5.676339                | -0.390083 | 4.685220  |

|    |    |   |           |           |           |
|----|----|---|-----------|-----------|-----------|
| 28 | 1  | 0 | 5.582560  | -2.038738 | 4.040172  |
| 29 | 6  | 0 | -4.812502 | -0.666587 | -2.221094 |
| 30 | 9  | 0 | -5.777042 | -1.010253 | -1.352094 |
| 31 | 9  | 0 | -4.824024 | -1.586292 | -3.195409 |
| 32 | 9  | 0 | -5.195116 | 0.499011  | -2.767825 |
| 33 | 6  | 0 | -2.271048 | -1.043819 | -5.072848 |
| 34 | 6  | 0 | -0.944527 | -1.190895 | -4.674252 |
| 35 | 6  | 0 | -0.306497 | -0.151872 | -4.022448 |
| 36 | 6  | 0 | -0.990628 | 1.041083  | -3.752474 |
| 37 | 6  | 0 | -2.319076 | 1.183381  | -4.155385 |
| 38 | 6  | 0 | -2.947677 | 0.142061  | -4.825403 |
| 39 | 7  | 0 | -0.291733 | 2.004333  | -3.004622 |
| 40 | 6  | 0 | -0.418109 | 3.362599  | -2.968086 |
| 41 | 16 | 0 | -1.316705 | 4.271791  | -4.054441 |
| 42 | 7  | 0 | 0.291553  | 3.885483  | -1.929313 |
| 43 | 6  | 0 | 0.524735  | 5.238665  | -1.615941 |
| 44 | 6  | 0 | 0.478049  | 5.599598  | -0.268919 |
| 45 | 6  | 0 | 0.759189  | 6.902964  | 0.115652  |
| 46 | 6  | 0 | 1.085227  | 7.846700  | -0.849635 |
| 47 | 6  | 0 | 1.146682  | 7.487431  | -2.194417 |
| 48 | 6  | 0 | 0.876224  | 6.185480  | -2.581485 |
| 49 | 6  | 0 | -2.963249 | -2.208435 | -5.704066 |
| 50 | 9  | 0 | -4.194932 | -1.910218 | -6.132628 |
| 51 | 9  | 0 | -2.283126 | -2.694016 | -6.756639 |
| 52 | 9  | 0 | -3.089499 | -3.236137 | -4.839694 |
| 53 | 6  | 0 | 1.345720  | 9.269968  | -0.468386 |
| 54 | 9  | 0 | 1.582930  | 9.414455  | 0.842264  |
| 55 | 9  | 0 | 0.303455  | 10.068307 | -0.762729 |
| 56 | 9  | 0 | 2.403085  | 9.779248  | -1.121357 |
| 57 | 1  | 0 | -0.413424 | -2.115821 | -4.866870 |
| 58 | 1  | 0 | 0.720834  | -0.260749 | -3.695635 |
| 59 | 1  | 0 | -2.866718 | 2.084827  | -3.929427 |
| 60 | 1  | 0 | -3.983088 | 0.247524  | -5.121898 |
| 61 | 1  | 0 | 0.502007  | 1.616477  | -2.501281 |
| 62 | 1  | 0 | 0.519201  | 3.241065  | -1.174161 |
| 63 | 1  | 0 | 0.219975  | 4.853856  | 0.474060  |
| 64 | 1  | 0 | 0.721888  | 7.179454  | 1.161327  |
| 65 | 1  | 0 | 1.425805  | 8.222669  | -2.939657 |
| 66 | 1  | 0 | 0.948864  | 5.898769  | -3.620042 |

---

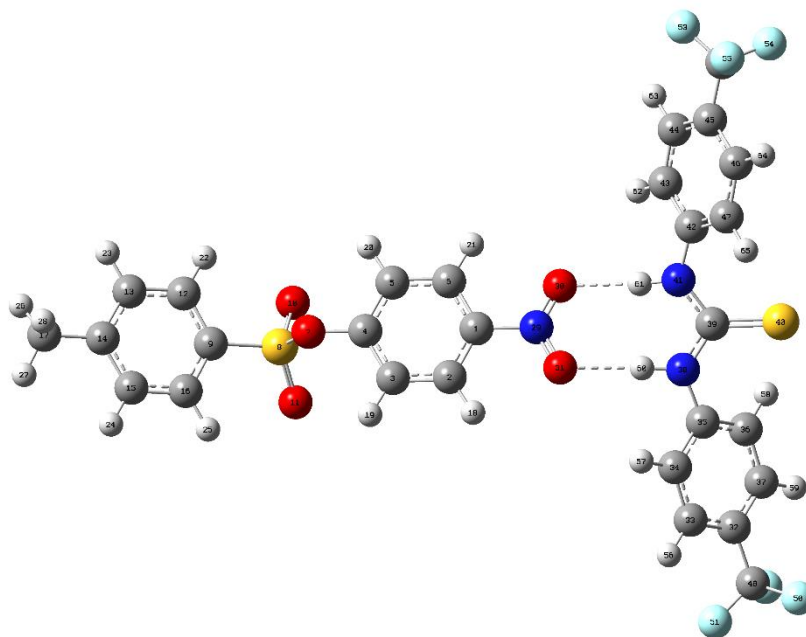

Figure S178: Output from the DFT modelling of **1:17** initiated with the nitro functionality coordinated to the receptor through the formation of two hydrogen bonds, one to each oxygen atom. Total electronic energy (E(RM062X)): -3015.094796 Hartree (see Table S33).

Table S33: Output from the DFT modelling of **1:17** initiated with the nitro functionality coordinated to the receptor through the formation of two hydrogen bonds, one to each oxygen atom.

| Center Number | Atomic Number | Atomic Type | Coordinates (Angstroms) |          |           |
|---------------|---------------|-------------|-------------------------|----------|-----------|
|               |               |             | X                       | Y        | Z         |
| 1             | 6             | 0           | 1.375935                | 3.769671 | 4.892242  |
| 2             | 6             | 0           | 2.355306                | 4.415728 | 4.149499  |
| 3             | 6             | 0           | 2.193498                | 4.488904 | 2.775581  |
| 4             | 6             | 0           | 1.069097                | 3.909616 | 2.200587  |
| 5             | 6             | 0           | 0.093404                | 3.264550 | 2.951178  |
| 6             | 6             | 0           | 0.247243                | 3.191907 | 4.326129  |
| 7             | 8             | 0           | 0.938380                | 3.945847 | 0.818253  |
| 8             | 16            | 0           | 0.057647                | 5.196864 | 0.205532  |
| 9             | 6             | 0           | 0.220420                | 4.802275 | -1.496650 |
| 10            | 8             | 0           | -1.305161               | 5.022428 | 0.651968  |
| 11            | 8             | 0           | 0.762276                | 6.415883 | 0.528533  |
| 12            | 6             | 0           | -0.711118               | 3.948992 | -2.078764 |
| 13            | 6             | 0           | -0.565549               | 3.634674 | -3.420990 |
| 14            | 6             | 0           | 0.493138                | 4.154764 | -4.172864 |
| 15            | 6             | 0           | 1.408725                | 5.009885 | -3.553172 |
| 16            | 6             | 0           | 1.285052                | 5.338792 | -2.211094 |
| 17            | 6             | 0           | 0.652348                | 3.780424 | -5.620480 |
| 18            | 1             | 0           | 3.215778                | 4.849075 | 4.638910  |
| 19            | 1             | 0           | 2.923119                | 4.981676 | 2.147194  |
| 20            | 1             | 0           | -0.763932               | 2.828504 | 2.456438  |
| 21            | 1             | 0           | -0.485055               | 2.698328 | 4.948897  |
| 22            | 1             | 0           | -1.534720               | 3.555561 | -1.496264 |
| 23            | 1             | 0           | -1.286181               | 2.978635 | -3.895191 |
| 24            | 1             | 0           | 2.226533                | 5.426257 | -4.129399 |

|    |    |   |           |           |           |
|----|----|---|-----------|-----------|-----------|
| 25 | 1  | 0 | 1.988025  | 6.007323  | -1.730147 |
| 26 | 1  | 0 | -0.318170 | 3.660691  | -6.102842 |
| 27 | 1  | 0 | 1.225647  | 4.532909  | -6.161545 |
| 28 | 1  | 0 | 1.183962  | 2.828627  | -5.703137 |
| 29 | 7  | 0 | 1.542575  | 3.692322  | 6.345944  |
| 30 | 8  | 0 | 0.649011  | 3.192375  | 7.000796  |
| 31 | 8  | 0 | 2.566719  | 4.132036  | 6.830845  |
| 32 | 6  | 0 | 4.473704  | 8.003412  | 10.921099 |
| 33 | 6  | 0 | 4.905931  | 7.280841  | 9.816555  |
| 34 | 6  | 0 | 4.276347  | 6.087917  | 9.489959  |
| 35 | 6  | 0 | 3.214035  | 5.619687  | 10.263545 |
| 36 | 6  | 0 | 2.767624  | 6.361278  | 11.359972 |
| 37 | 6  | 0 | 3.405420  | 7.545792  | 11.689291 |
| 38 | 7  | 0 | 2.574668  | 4.437294  | 9.840281  |
| 39 | 6  | 0 | 2.120726  | 3.398281  | 10.593219 |
| 40 | 16 | 0 | 2.361343  | 3.247556  | 12.249573 |
| 41 | 7  | 0 | 1.446362  | 2.497794  | 9.827387  |
| 42 | 6  | 0 | 0.918300  | 1.243998  | 10.194435 |
| 43 | 6  | 0 | -0.324683 | 0.893393  | 9.665828  |
| 44 | 6  | 0 | -0.872018 | -0.352767 | 9.935091  |
| 45 | 6  | 0 | -0.176006 | -1.248206 | 10.737387 |
| 46 | 6  | 0 | 1.070157  | -0.907222 | 11.257266 |
| 47 | 6  | 0 | 1.624902  | 0.332016  | 10.981766 |
| 48 | 6  | 0 | 5.169366  | 9.265648  | 11.324021 |
| 49 | 9  | 0 | 4.303178  | 10.213250 | 11.717467 |
| 50 | 9  | 0 | 6.007324  | 9.070099  | 12.358319 |
| 51 | 9  | 0 | 5.901481  | 9.786294  | 10.329883 |
| 52 | 6  | 0 | -0.774041 | -2.574908 | 11.086035 |
| 53 | 9  | 0 | -1.716794 | -2.955150 | 10.212532 |
| 54 | 9  | 0 | -1.356965 | -2.561189 | 12.298630 |
| 55 | 9  | 0 | 0.148719  | -3.549109 | 11.123737 |
| 56 | 1  | 0 | 5.729234  | 7.642068  | 9.214062  |
| 57 | 1  | 0 | 4.607852  | 5.512347  | 8.633657  |
| 58 | 1  | 0 | 1.921812  | 6.017704  | 11.936604 |
| 59 | 1  | 0 | 3.057597  | 8.127045  | 12.534733 |
| 60 | 1  | 0 | 2.590890  | 4.289962  | 8.833557  |
| 61 | 1  | 0 | 1.154035  | 2.818277  | 8.906860  |
| 62 | 1  | 0 | -0.860674 | 1.602278  | 9.045718  |
| 63 | 1  | 0 | -1.835852 | -0.622216 | 9.522799  |
| 64 | 1  | 0 | 1.618351  | -1.619680 | 11.861598 |
| 65 | 1  | 0 | 2.602720  | 0.589112  | 11.360802 |

---

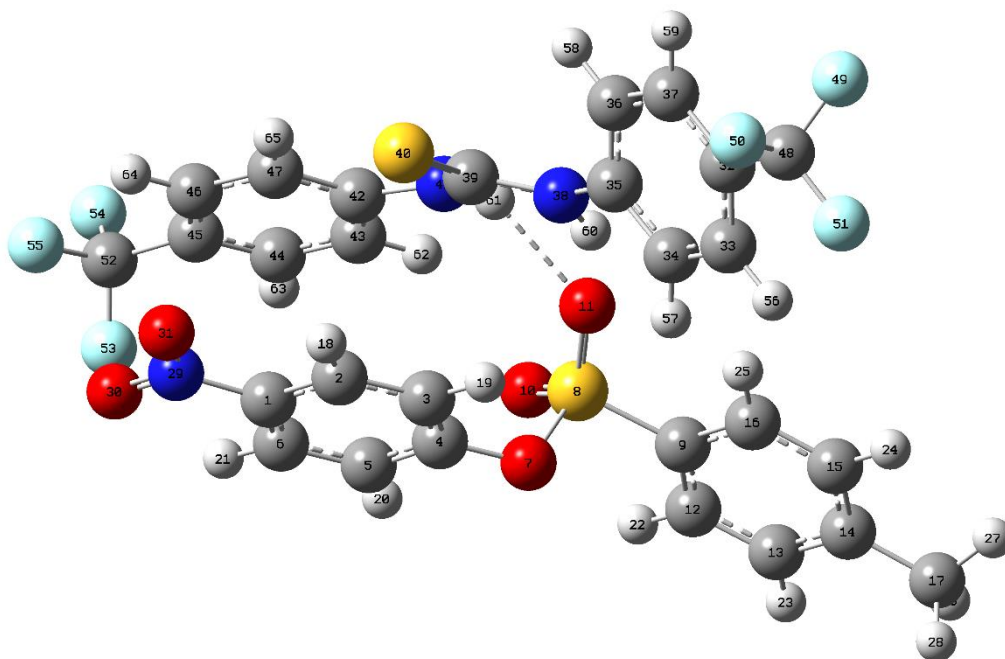

Figure S179: Output from the DFT modelling of **1:17** initiated with the S=O coordinated to the receptor through the formation of one hydrogen bond. Total electronic energy (E(RM062X)): -3015.109021 Hartree. Binding mode 1 (see Table S34).

Table S34: Output from the DFT modelling of **1:17** initiated with the S=O coordinated to the receptor through the formation of one hydrogen bonds.

| Center Number | Atomic Number | Atomic Type | Coordinates (Angstroms) |          |           |
|---------------|---------------|-------------|-------------------------|----------|-----------|
|               |               |             | X                       | Y        | Z         |
| 1             | 6             | 0           | -2.883403               | 8.654768 | 0.134718  |
| 2             | 6             | 0           | -2.477719               | 7.767496 | 1.122026  |
| 3             | 6             | 0           | -1.612860               | 6.742145 | 0.771725  |
| 4             | 6             | 0           | -1.200839               | 6.641281 | -0.550503 |
| 5             | 6             | 0           | -1.632996               | 7.512608 | -1.541047 |
| 6             | 6             | 0           | -2.489553               | 8.546461 | -1.190528 |
| 7             | 8             | 0           | -0.339258               | 5.595795 | -0.894844 |
| 8             | 16            | 0           | 1.249979                | 5.972199 | -0.960497 |
| 9             | 6             | 0           | 1.892608                | 4.404037 | -1.398812 |
| 10            | 8             | 0           | 1.440368                | 6.941295 | -2.013484 |
| 11            | 8             | 0           | 1.660217                | 6.338971 | 0.387239  |
| 12            | 6             | 0           | 1.985573                | 4.080047 | -2.748463 |
| 13            | 6             | 0           | 2.481624                | 2.831379 | -3.089421 |
| 14            | 6             | 0           | 2.874362                | 1.917957 | -2.105906 |
| 15            | 6             | 0           | 2.769550                | 2.282573 | -0.760085 |
| 16            | 6             | 0           | 2.275545                | 3.524651 | -0.392029 |
| 17            | 6             | 0           | 3.382251                | 0.556103 | -2.489605 |
| 18            | 1             | 0           | -2.812368               | 7.895589 | 2.141570  |
| 19            | 1             | 0           | -1.261387               | 6.027235 | 1.505363  |
| 20            | 1             | 0           | -1.285712               | 7.388226 | -2.558002 |
| 21            | 1             | 0           | -2.829212               | 9.270208 | -1.918591 |
| 22            | 1             | 0           | 1.690362                | 4.792925 | -3.508187 |
| 23            | 1             | 0           | 2.570277                | 2.562615 | -4.135397 |
| 24            | 1             | 0           | 3.083035                | 1.586371 | 0.008765  |
| 25            | 1             | 0           | 2.204466                | 3.812972 | 0.649037  |
| 26            | 1             | 0           | 3.880384                | 0.581236 | -3.458797 |



|    |    |   |           |           |           |
|----|----|---|-----------|-----------|-----------|
| 27 | 1  | 0 | 4.077423  | 0.171441  | -1.743392 |
| 28 | 1  | 0 | 2.546517  | -0.145229 | -2.561467 |
| 29 | 7  | 0 | -3.743670 | 9.785192  | 0.522714  |
| 30 | 8  | 0 | -4.078117 | 10.565472 | -0.343437 |
| 31 | 8  | 0 | -4.051389 | 9.887034  | 1.690750  |
| 32 | 6  | 0 | 1.100043  | 4.050410  | 6.442115  |
| 33 | 6  | 0 | 0.822117  | 3.605494  | 5.158262  |
| 34 | 6  | 0 | 0.780700  | 4.518810  | 4.110800  |
| 35 | 6  | 0 | 1.026651  | 5.867535  | 4.351009  |
| 36 | 6  | 0 | 1.325585  | 6.308534  | 5.642593  |
| 37 | 6  | 0 | 1.353386  | 5.400526  | 6.685501  |
| 38 | 7  | 0 | 1.041834  | 6.755727  | 3.252191  |
| 39 | 6  | 0 | 0.402294  | 7.958368  | 3.162925  |
| 40 | 16 | 0 | -0.719167 | 8.487083  | 4.292565  |
| 41 | 7  | 0 | 0.773857  | 8.627978  | 2.036358  |
| 42 | 6  | 0 | 0.168817  | 9.682349  | 1.329680  |
| 43 | 6  | 0 | 0.508923  | 9.756974  | -0.030080 |
| 44 | 6  | 0 | -0.069199 | 10.707389 | -0.847924 |
| 45 | 6  | 0 | -1.000600 | 11.599019 | -0.319643 |
| 46 | 6  | 0 | -1.299132 | 11.568988 | 1.034651  |
| 47 | 6  | 0 | -0.714853 | 10.621192 | 1.868534  |
| 48 | 6  | 0 | 1.132817  | 3.099823  | 7.598124  |
| 49 | 9  | 0 | 2.302753  | 3.155329  | 8.257412  |
| 50 | 9  | 0 | 0.180086  | 3.381437  | 8.503753  |
| 51 | 9  | 0 | 0.952386  | 1.827213  | 7.223941  |
| 52 | 6  | 0 | -1.656696 | 12.577964 | -1.240228 |
| 53 | 9  | 0 | -2.208092 | 11.964466 | -2.303523 |
| 54 | 9  | 0 | -0.778277 | 13.466291 | -1.740676 |
| 55 | 9  | 0 | -2.624658 | 13.281389 | -0.643158 |
| 56 | 1  | 0 | 0.630298  | 2.557103  | 4.971494  |
| 57 | 1  | 0 | 0.552140  | 4.184676  | 3.105796  |
| 58 | 1  | 0 | 1.540774  | 7.353514  | 5.817330  |
| 59 | 1  | 0 | 1.587063  | 5.737353  | 7.688616  |
| 60 | 1  | 0 | 1.427204  | 6.378234  | 2.390452  |
| 61 | 1  | 0 | 1.462609  | 8.138119  | 1.473435  |
| 62 | 1  | 0 | 1.208282  | 9.042897  | -0.451989 |
| 63 | 1  | 0 | 0.178684  | 10.732710 | -1.902874 |
| 64 | 1  | 0 | -2.011481 | 12.271696 | 1.449229  |
| 65 | 1  | 0 | -0.961366 | 10.604192 | 2.916430  |

---

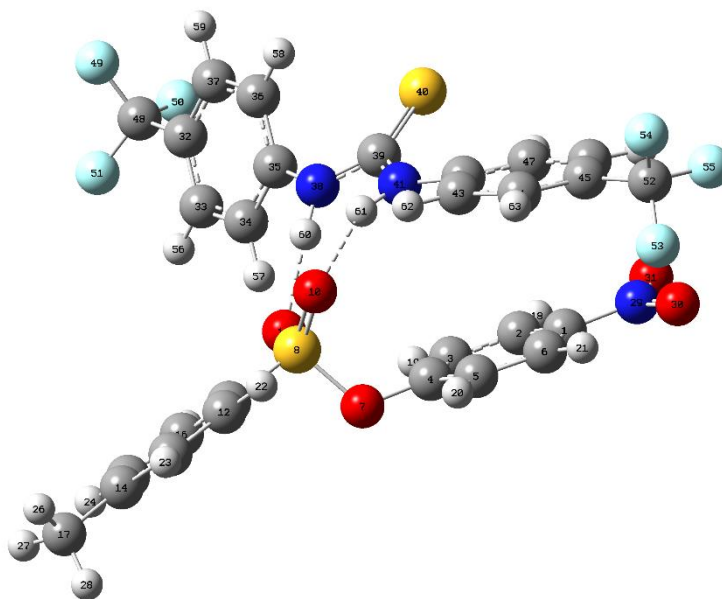

Figure S180: Output from the DFT modelling of **1:17** initiated with the O=S=O coordinated to the receptor through the formation of two hydrogen bonds, one to each oxygen atom. Total electronic energy (E(RM062X)): -3015.107536 Hartree. Binding mode 2 (see Table S35).

Table S35: Output from the DFT modelling of **1:17** initiated with the O=S=O coordinated to the receptor through the formation of two hydrogen bonds, one to each oxygen atom.

| Center Number | Atomic Number | Atomic Type | Coordinates (Angstroms) |          |           |
|---------------|---------------|-------------|-------------------------|----------|-----------|
|               |               |             | X                       | Y        | Z         |
| 1             | 6             | 0           | -0.621739               | 3.281951 | 4.678722  |
| 2             | 6             | 0           | -0.040539               | 4.492593 | 4.326415  |
| 3             | 6             | 0           | 0.377878                | 4.669129 | 3.017274  |
| 4             | 6             | 0           | 0.183896                | 3.629938 | 2.113973  |
| 5             | 6             | 0           | -0.400765               | 2.424651 | 2.468654  |
| 6             | 6             | 0           | -0.806938               | 2.240566 | 3.783041  |
| 7             | 8             | 0           | 0.627876                | 3.768367 | 0.794593  |
| 8             | 16            | 0           | -0.227080               | 4.773243 | -0.159521 |
| 9             | 6             | 0           | 0.462087                | 4.360506 | -1.712745 |
| 10            | 8             | 0           | -1.622768               | 4.383192 | -0.061677 |
| 11            | 8             | 0           | 0.103200                | 6.138085 | 0.212619  |
| 12            | 6             | 0           | 0.009919                | 3.213537 | -2.361107 |
| 13            | 6             | 0           | 0.567819                | 2.895491 | -3.587087 |
| 14            | 6             | 0           | 1.561168                | 3.699912 | -4.160020 |
| 15            | 6             | 0           | 1.984892                | 4.843178 | -3.479700 |
| 16            | 6             | 0           | 1.443390                | 5.185026 | -2.247965 |
| 17            | 6             | 0           | 2.165199                | 3.319963 | -5.482974 |
| 18            | 1             | 0           | 0.078026                | 5.273442 | 5.064297  |
| 19            | 1             | 0           | 0.849623                | 5.588912 | 2.697081  |
| 20            | 1             | 0           | -0.533144               | 1.652736 | 1.722107  |
| 21            | 1             | 0           | -1.279437               | 1.323198 | 4.106479  |
| 22            | 1             | 0           | -0.765148               | 2.597727 | -1.921594 |
| 23            | 1             | 0           | 0.227395                | 2.011467 | -4.113437 |
| 24            | 1             | 0           | 2.746032                | 5.477076 | -3.918382 |
| 25            | 1             | 0           | 1.763871                | 6.073673 | -1.719339 |
| 26            | 1             | 0           | 1.390215                | 3.024292 | -6.191658 |
| 27            | 1             | 0           | 2.736683                | 4.143795 | -5.908743 |
| 28            | 1             | 0           | 2.837336                | 2.467518 | -5.355637 |

|    |    |   |           |           |           |
|----|----|---|-----------|-----------|-----------|
| 29 | 7  | 0 | -1.092360 | 3.107837  | 6.062541  |
| 30 | 8  | 0 | -1.524674 | 2.020914  | 6.381207  |
| 31 | 8  | 0 | -1.044986 | 4.068806  | 6.800521  |
| 32 | 6  | 0 | -1.219085 | 11.836188 | 0.675105  |
| 33 | 6  | 0 | -0.189006 | 10.904228 | 0.649330  |
| 34 | 6  | 0 | -0.456979 | 9.578600  | 0.958373  |
| 35 | 6  | 0 | -1.753783 | 9.183726  | 1.290212  |
| 36 | 6  | 0 | -2.790979 | 10.119016 | 1.292017  |
| 37 | 6  | 0 | -2.517033 | 11.443715 | 0.993055  |
| 38 | 7  | 0 | -1.970182 | 7.811853  | 1.527378  |
| 39 | 6  | 0 | -2.747108 | 7.228115  | 2.483227  |
| 40 | 16 | 0 | -3.509318 | 8.067169  | 3.718526  |
| 41 | 7  | 0 | -2.817748 | 5.878578  | 2.292269  |
| 42 | 6  | 0 | -3.322353 | 4.852455  | 3.108595  |
| 43 | 6  | 0 | -3.665733 | 3.662792  | 2.450575  |
| 44 | 6  | 0 | -4.082638 | 2.559023  | 3.170440  |
| 45 | 6  | 0 | -4.169683 | 2.631677  | 4.558843  |
| 46 | 6  | 0 | -3.856678 | 3.813614  | 5.215262  |
| 47 | 6  | 0 | -3.421102 | 4.922970  | 4.500524  |
| 48 | 6  | 0 | -0.938385 | 13.280016 | 0.399947  |
| 49 | 9  | 0 | -1.936593 | 13.867085 | -0.278698 |
| 50 | 9  | 0 | -0.785609 | 13.988466 | 1.533738  |
| 51 | 9  | 0 | 0.182710  | 13.454753 | -0.313656 |
| 52 | 6  | 0 | -4.570204 | 1.405712  | 5.315632  |
| 53 | 9  | 0 | -3.735064 | 0.378408  | 5.069514  |
| 54 | 9  | 0 | -5.796427 | 0.976031  | 4.967262  |
| 55 | 9  | 0 | -4.582639 | 1.594438  | 6.639384  |
| 56 | 1  | 0 | 0.817203  | 11.207785 | 0.390397  |
| 57 | 1  | 0 | 0.336991  | 8.840977  | 0.942379  |
| 58 | 1  | 0 | -3.801303 | 9.807230  | 1.511654  |
| 59 | 1  | 0 | -3.319907 | 12.170803 | 0.987070  |
| 60 | 1  | 0 | -1.311562 | 7.204554  | 1.043846  |
| 61 | 1  | 0 | -2.545202 | 5.547435  | 1.370049  |
| 62 | 1  | 0 | -3.576677 | 3.607125  | 1.371903  |
| 63 | 1  | 0 | -4.327843 | 1.638499  | 2.653408  |
| 64 | 1  | 0 | -3.908300 | 3.864298  | 6.296095  |
| 65 | 1  | 0 | -3.138462 | 5.820559  | 5.026659  |

---

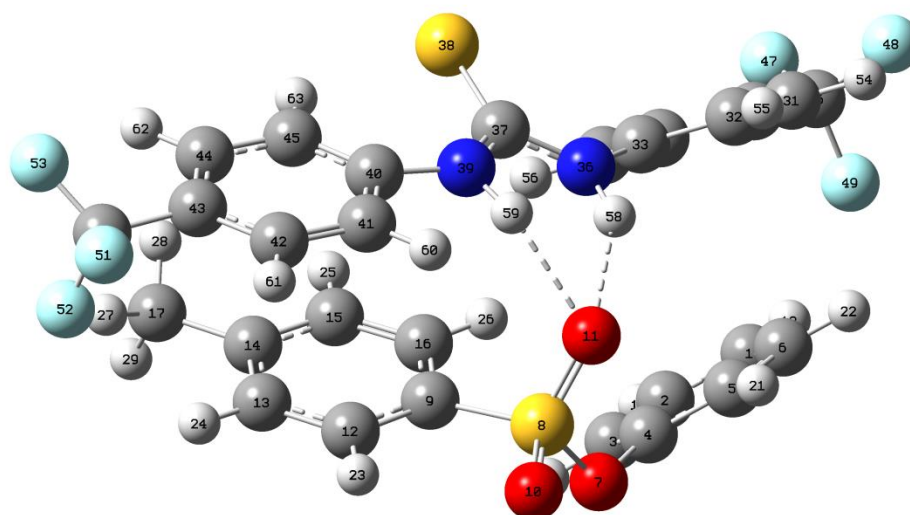

Figure S181: Output from the DFT modelling of **1:18** initiated with the S=O coordinated to the receptor through the formation of two hydrogen bonds. Total electronic energy (E(RM062X)): -2810.625018 Hartree. Binding mode 1 (see Table S36).

Table S36: Output from the DFT modelling of **1:18** initiated with the S=O coordinated to the receptor through the formation of two hydrogen bonds.

| Center Number | Atomic Number | Atomic Type | Coordinates (Angstroms) |           |          |
|---------------|---------------|-------------|-------------------------|-----------|----------|
|               |               |             | X                       | Y         | Z        |
| 1             | 6             | 0           | 4.678130                | 1.625594  | 3.580050 |
| 2             | 6             | 0           | 4.487505                | 0.285162  | 3.904676 |
| 3             | 6             | 0           | 3.354841                | -0.111393 | 4.607632 |
| 4             | 6             | 0           | 2.428122                | 0.854738  | 4.970798 |
| 5             | 6             | 0           | 2.595247                | 2.196642  | 4.662514 |
| 6             | 6             | 0           | 3.733778                | 2.575581  | 3.957278 |
| 7             | 8             | 0           | 1.338397                | 0.446550  | 5.759663 |
| 8             | 16            | 0           | -0.171621               | 0.440152  | 5.177414 |
| 9             | 6             | 0           | -0.345959               | -1.111047 | 4.363105 |
| 10            | 8             | 0           | -1.013739               | 0.492002  | 6.342667 |
| 11            | 8             | 0           | -0.264852               | 1.498682  | 4.179331 |
| 12            | 6             | 0           | -1.383230               | -1.946925 | 4.753837 |
| 13            | 6             | 0           | -1.623994               | -3.097200 | 4.011974 |
| 14            | 6             | 0           | -0.836246               | -3.416817 | 2.906891 |
| 15            | 6             | 0           | 0.221375                | -2.566450 | 2.556643 |
| 16            | 6             | 0           | 0.466455                | -1.404541 | 3.267080 |
| 17            | 6             | 0           | -1.121571               | -4.649790 | 2.096629 |
| 18            | 1             | 0           | 5.559299                | 1.929540  | 3.028518 |
| 19            | 1             | 0           | 5.221581                | -0.455961 | 3.613624 |
| 20            | 1             | 0           | 3.185303                | -1.144915 | 4.883835 |
| 21            | 1             | 0           | 1.855475                | 2.920953  | 4.977731 |
| 22            | 1             | 0           | 3.882476                | 3.618884  | 3.707819 |
| 23            | 1             | 0           | -2.004280               | -1.687087 | 5.601821 |
| 24            | 1             | 0           | -2.453472               | -3.740388 | 4.282548 |
| 25            | 1             | 0           | 0.836485                | -2.801906 | 1.695086 |
| 26            | 1             | 0           | 1.258685                | -0.731146 | 2.960334 |
| 27            | 1             | 0           | -2.159616               | -4.961672 | 2.218134 |
| 28            | 1             | 0           | -0.929333               | -4.470354 | 1.037454 |
| 29            | 1             | 0           | -0.478005               | -5.472959 | 2.418508 |
| 30            | 6             | 0           | 4.704026                | 2.408792  | 0.180310 |

|    |    |   |           |           |           |
|----|----|---|-----------|-----------|-----------|
| 31 | 6  | 0 | 3.803895  | 3.417753  | 0.496941  |
| 32 | 6  | 0 | 2.508340  | 3.083939  | 0.872469  |
| 33 | 6  | 0 | 2.130519  | 1.747191  | 0.943437  |
| 34 | 6  | 0 | 3.039136  | 0.736797  | 0.631802  |
| 35 | 6  | 0 | 4.326075  | 1.069601  | 0.242833  |
| 36 | 7  | 0 | 0.830722  | 1.431830  | 1.420968  |
| 37 | 6  | 0 | -0.097856 | 0.660262  | 0.796077  |
| 38 | 16 | 0 | 0.146017  | -0.005192 | -0.726110 |
| 39 | 7  | 0 | -1.235254 | 0.538337  | 1.539062  |
| 40 | 6  | 0 | -2.276933 | -0.404473 | 1.519340  |
| 41 | 6  | 0 | -3.258702 | -0.229219 | 2.506270  |
| 42 | 6  | 0 | -4.270988 | -1.156576 | 2.672277  |
| 43 | 6  | 0 | -4.326428 | -2.269612 | 1.839683  |
| 44 | 6  | 0 | -3.385977 | -2.427916 | 0.829920  |
| 45 | 6  | 0 | -2.362616 | -1.506277 | 0.661327  |
| 46 | 6  | 0 | 6.123159  | 2.748053  | -0.155939 |
| 47 | 9  | 0 | 6.636956  | 1.921159  | -1.077441 |
| 48 | 9  | 0 | 6.255669  | 3.996612  | -0.620844 |
| 49 | 9  | 0 | 6.924179  | 2.654165  | 0.924553  |
| 50 | 6  | 0 | -5.342027 | -3.339811 | 2.071772  |
| 51 | 9  | 0 | -6.418682 | -2.893888 | 2.732548  |
| 52 | 9  | 0 | -4.836177 | -4.353430 | 2.807775  |
| 53 | 9  | 0 | -5.774734 | -3.891049 | 0.928135  |
| 54 | 1  | 0 | 4.105152  | 4.456192  | 0.444467  |
| 55 | 1  | 0 | 1.789510  | 3.856440  | 1.117134  |
| 56 | 1  | 0 | 2.736963  | -0.299895 | 0.702362  |
| 57 | 1  | 0 | 5.039428  | 0.290797  | 0.002124  |
| 58 | 1  | 0 | 0.594770  | 1.821645  | 2.330316  |
| 59 | 1  | 0 | -1.239829 | 1.095403  | 2.388666  |
| 60 | 1  | 0 | -3.212021 | 0.634950  | 3.160510  |
| 61 | 1  | 0 | -5.008902 | -1.017028 | 3.452099  |
| 62 | 1  | 0 | -3.437226 | -3.287214 | 0.171510  |
| 63 | 1  | 0 | -1.629208 | -1.657986 | -0.112113 |

---

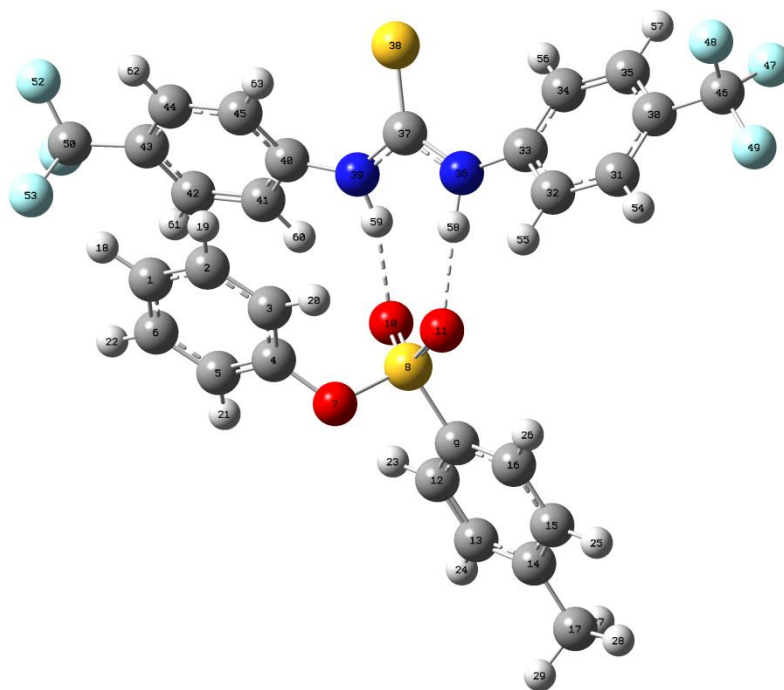

Figure S182: Output from the DFT modelling of **1:18** initiated with the O=S=O coordinated to the receptor through the formation of two hydrogen bonds, one to each oxygen atom. Total electronic energy (E(RM062X)): -2810.618042 Hartree. Binding mode 2 (see Table S37).

Table S37: Output from the DFT modelling of **1:18** initiated with the O=S=O coordinated to the receptor through the formation of two hydrogen bonds, one to each oxygen atom.

| Center Number | Atomic Number | Atomic Type | Coordinates (Angstroms) |           |          |
|---------------|---------------|-------------|-------------------------|-----------|----------|
|               |               |             | X                       | Y         | Z        |
| 1             | 6             | 0           | -3.042031               | 3.073065  | 3.177894 |
| 2             | 6             | 0           | -1.660989               | 3.113220  | 3.013253 |
| 3             | 6             | 0           | -0.853721               | 2.142288  | 3.598733 |
| 4             | 6             | 0           | -1.466877               | 1.139030  | 4.333100 |
| 5             | 6             | 0           | -2.838984               | 1.070426  | 4.507484 |
| 6             | 6             | 0           | -3.628548               | 2.056483  | 3.926190 |
| 7             | 8             | 0           | -0.681626               | 0.162397  | 4.981351 |
| 8             | 16            | 0           | 0.072705                | -0.916088 | 4.043868 |
| 9             | 6             | 0           | 0.426727                | -2.149292 | 5.236476 |
| 10            | 8             | 0           | -0.878195               | -1.387974 | 3.049096 |
| 11            | 8             | 0           | 1.299306                | -0.320306 | 3.539520 |
| 12            | 6             | 0           | -0.621652               | -2.934912 | 5.712077 |
| 13            | 6             | 0           | -0.333889               | -3.910031 | 6.649783 |
| 14            | 6             | 0           | 0.975099                | -4.105788 | 7.110917 |
| 15            | 6             | 0           | 1.997704                | -3.300271 | 6.609434 |
| 16            | 6             | 0           | 1.735276                | -2.311582 | 5.668594 |
| 17            | 6             | 0           | 1.257133                | -5.174902 | 8.129528 |
| 18            | 1             | 0           | -3.665572               | 3.826772  | 2.713136 |
| 19            | 1             | 0           | -1.205618               | 3.902355  | 2.427619 |
| 20            | 1             | 0           | 0.224593                | 2.162906  | 3.498235 |
| 21            | 1             | 0           | -3.263983               | 0.261295  | 5.088044 |
| 22            | 1             | 0           | -4.704807               | 2.021461  | 4.044567 |
| 23            | 1             | 0           | -1.632063               | -2.788694 | 5.349680 |
| 24            | 1             | 0           | -1.133337               | -4.533752 | 7.032744 |
| 25            | 1             | 0           | 3.013550                | -3.445180 | 6.956934 |

|    |    |   |           |           |           |
|----|----|---|-----------|-----------|-----------|
| 26 | 1  | 0 | 2.525276  | -1.685197 | 5.274454  |
| 27 | 1  | 0 | 0.961209  | -6.153543 | 7.745669  |
| 28 | 1  | 0 | 2.314871  | -5.208220 | 8.387118  |
| 29 | 1  | 0 | 0.682522  | -4.993160 | 9.040304  |
| 30 | 6  | 0 | 5.567593  | -0.654024 | -0.514743 |
| 31 | 6  | 0 | 5.256027  | -0.168126 | 0.749132  |
| 32 | 6  | 0 | 3.930081  | 0.057610  | 1.088468  |
| 33 | 6  | 0 | 2.914565  | -0.203372 | 0.166899  |
| 34 | 6  | 0 | 3.230555  | -0.714656 | -1.094041 |
| 35 | 6  | 0 | 4.556724  | -0.929566 | -1.432164 |
| 36 | 7  | 0 | 1.587775  | -0.012581 | 0.598326  |
| 37 | 6  | 0 | 0.533170  | 0.508026  | -0.090814 |
| 38 | 16 | 0 | 0.649408  | 1.207325  | -1.611774 |
| 39 | 7  | 0 | -0.621380 | 0.376125  | 0.621921  |
| 40 | 6  | 0 | -1.893739 | 0.938587  | 0.424139  |
| 41 | 6  | 0 | -2.969207 | 0.232662  | 0.974456  |
| 42 | 6  | 0 | -4.251186 | 0.749212  | 0.909437  |
| 43 | 6  | 0 | -4.469616 | 1.975302  | 0.290881  |
| 44 | 6  | 0 | -3.405737 | 2.680488  | -0.259752 |
| 45 | 6  | 0 | -2.117205 | 2.171269  | -0.194913 |
| 46 | 6  | 0 | 6.995012  | -0.848264 | -0.919153 |
| 47 | 9  | 0 | 7.155946  | -1.930816 | -1.696434 |
| 48 | 9  | 0 | 7.464722  | 0.196084  | -1.626009 |
| 49 | 9  | 0 | 7.809184  | -0.992957 | 0.135682  |
| 50 | 6  | 0 | -5.834222 | 2.581181  | 0.325062  |
| 51 | 9  | 0 | -6.805805 | 1.658792  | 0.254745  |
| 52 | 9  | 0 | -6.037353 | 3.451145  | -0.674057 |
| 53 | 9  | 0 | -6.046684 | 3.262830  | 1.471194  |
| 54 | 1  | 0 | 6.041143  | 0.034771  | 1.466128  |
| 55 | 1  | 0 | 3.673874  | 0.437694  | 2.070584  |
| 56 | 1  | 0 | 2.444161  | -0.952912 | -1.794524 |
| 57 | 1  | 0 | 4.804414  | -1.332330 | -2.406703 |
| 58 | 1  | 0 | 1.463166  | -0.112267 | 1.604295  |
| 59 | 1  | 0 | -0.608605 | -0.321820 | 1.362585  |
| 60 | 1  | 0 | -2.786273 | -0.714231 | 1.469225  |
| 61 | 1  | 0 | -5.077825 | 0.201690  | 1.345612  |
| 62 | 1  | 0 | -3.577141 | 3.641227  | -0.729496 |
| 63 | 1  | 0 | -1.293419 | 2.736518  | -0.600829 |

-----

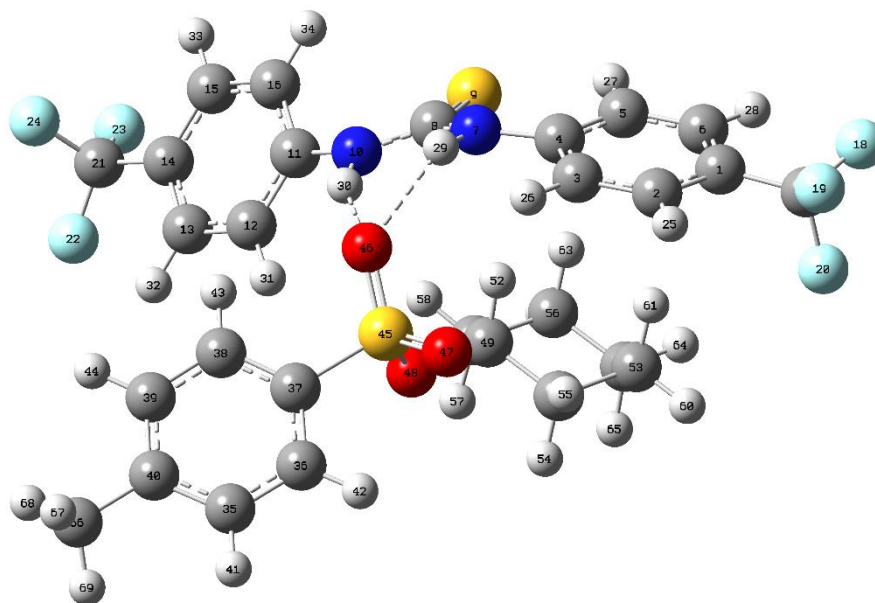

Figure S183: Output from the DFT modelling of **1:19** initiated with the S=O coordinated to the receptor through the formation of two hydrogen bonds. Total electronic energy (E(RM062X)): -2814.242885 Hartree. Binding mode 1 (see Table S38).

Table S38: Output from the DFT modelling of **1:19** initiated with the S=O coordinated to the receptor through the formation of two hydrogen bonds.

| Center Number | Atomic Number | Atomic Type | Coordinates (Angstroms) |           |           |
|---------------|---------------|-------------|-------------------------|-----------|-----------|
|               |               |             | X                       | Y         | Z         |
| 1             | 6             | 0           | 5.406743                | -0.478411 | 1.046336  |
| 2             | 6             | 0           | 4.811977                | 0.624079  | 0.436641  |
| 3             | 6             | 0           | 3.545051                | 0.504925  | -0.101301 |
| 4             | 6             | 0           | 2.851441                | -0.715596 | -0.040344 |
| 5             | 6             | 0           | 3.468765                | -1.827089 | 0.537349  |
| 6             | 6             | 0           | 4.739946                | -1.694570 | 1.086017  |
| 7             | 7             | 0           | 1.548934                | -0.687526 | -0.573243 |
| 8             | 6             | 0           | 0.433393                | -1.421536 | -0.269922 |
| 9             | 16            | 0           | 0.427456                | -2.950170 | 0.412120  |
| 10            | 7             | 0           | -0.698545               | -0.730397 | -0.583597 |
| 11            | 6             | 0           | -2.034037               | -1.173435 | -0.460402 |
| 12            | 6             | 0           | -2.938882               | -0.331297 | 0.182325  |
| 13            | 6             | 0           | -4.277722               | -0.690139 | 0.277312  |
| 14            | 6             | 0           | -4.700452               | -1.897047 | -0.261877 |
| 15            | 6             | 0           | -3.798502               | -2.738805 | -0.911538 |
| 16            | 6             | 0           | -2.466569               | -2.377473 | -1.019128 |
| 17            | 6             | 0           | 6.729545                | -0.316799 | 1.723655  |
| 18            | 9             | 0           | 7.384677                | -1.478439 | 1.852768  |
| 19            | 9             | 0           | 7.537379                | 0.525798  | 1.062283  |
| 20            | 9             | 0           | 6.593738                | 0.187095  | 2.965633  |
| 21            | 6             | 0           | -6.141009               | -2.299774 | -0.197654 |
| 22            | 9             | 0           | -6.843096               | -1.557331 | 0.667873  |
| 23            | 9             | 0           | -6.286102               | -3.582874 | 0.170517  |
| 24            | 9             | 0           | -6.747624               | -2.181228 | -1.392392 |
| 25            | 1             | 0           | 5.330647                | 1.573904  | 0.392559  |
| 26            | 1             | 0           | 3.072109                | 1.369326  | -0.556949 |
| 27            | 1             | 0           | 2.967838                | -2.780065 | 0.562405  |
| 28            | 1             | 0           | 5.211667                | -2.556080 | 1.541963  |



|    |    |   |           |           |           |
|----|----|---|-----------|-----------|-----------|
| 29 | 1  | 0 | 1.345630  | 0.196825  | -1.030565 |
| 30 | 1  | 0 | -0.592575 | 0.275243  | -0.703957 |
| 31 | 1  | 0 | -2.589216 | 0.600543  | 0.613223  |
| 32 | 1  | 0 | -4.980337 | -0.038238 | 0.779620  |
| 33 | 1  | 0 | -4.140277 | -3.674067 | -1.338660 |
| 34 | 1  | 0 | -1.763384 | -3.015161 | -1.535881 |
| 35 | 6  | 0 | -1.857367 | 6.293514  | 0.815815  |
| 36 | 6  | 0 | -0.812381 | 5.388243  | 0.911811  |
| 37 | 6  | 0 | -0.924236 | 4.175079  | 0.239500  |
| 38 | 6  | 0 | -2.041636 | 3.850170  | -0.519876 |
| 39 | 6  | 0 | -3.074016 | 4.774301  | -0.603028 |
| 40 | 6  | 0 | -2.997975 | 6.001440  | 0.060291  |
| 41 | 1  | 0 | -1.788046 | 7.242905  | 1.333876  |
| 42 | 1  | 0 | 0.074171  | 5.618134  | 1.490043  |
| 43 | 1  | 0 | -2.096605 | 2.902802  | -1.041228 |
| 44 | 1  | 0 | -3.951952 | 4.538243  | -1.192800 |
| 45 | 16 | 0 | 0.391293  | 3.018543  | 0.379820  |
| 46 | 8  | 0 | 0.268189  | 2.001651  | -0.665706 |
| 47 | 8  | 0 | 1.669294  | 3.690790  | 0.484508  |
| 48 | 8  | 0 | 0.019673  | 2.344086  | 1.774587  |
| 49 | 6  | 0 | 0.932245  | 1.294436  | 2.265223  |
| 50 | 6  | 0 | 1.985181  | 1.898706  | 3.177586  |
| 51 | 6  | 0 | 0.070606  | 0.255584  | 2.957518  |
| 52 | 1  | 0 | 1.412988  | 0.841757  | 1.394891  |
| 53 | 6  | 0 | 2.866556  | 0.782010  | 3.749385  |
| 54 | 1  | 0 | 1.475498  | 2.428370  | 3.989754  |
| 55 | 1  | 0 | 2.583323  | 2.623732  | 2.622641  |
| 56 | 6  | 0 | 0.960861  | -0.842499 | 3.551530  |
| 57 | 1  | 0 | -0.501141 | 0.749642  | 3.750418  |
| 58 | 1  | 0 | -0.641173 | -0.168236 | 2.242886  |
| 59 | 6  | 0 | 2.021962  | -0.259260 | 4.485492  |
| 60 | 1  | 0 | 3.619393  | 1.214157  | 4.412008  |
| 61 | 1  | 0 | 3.406930  | 0.292557  | 2.929143  |
| 62 | 1  | 0 | 0.336737  | -1.571031 | 4.073591  |
| 63 | 1  | 0 | 1.457440  | -1.378930 | 2.735274  |
| 64 | 1  | 0 | 2.659594  | -1.058066 | 4.871541  |
| 65 | 1  | 0 | 1.534594  | 0.211280  | 5.347263  |
| 66 | 6  | 0 | -4.108808 | 7.007864  | -0.060226 |
| 67 | 1  | 0 | -3.892225 | 7.707782  | -0.871712 |
| 68 | 1  | 0 | -5.058388 | 6.521197  | -0.282389 |
| 69 | 1  | 0 | -4.214139 | 7.586629  | 0.857781  |

---

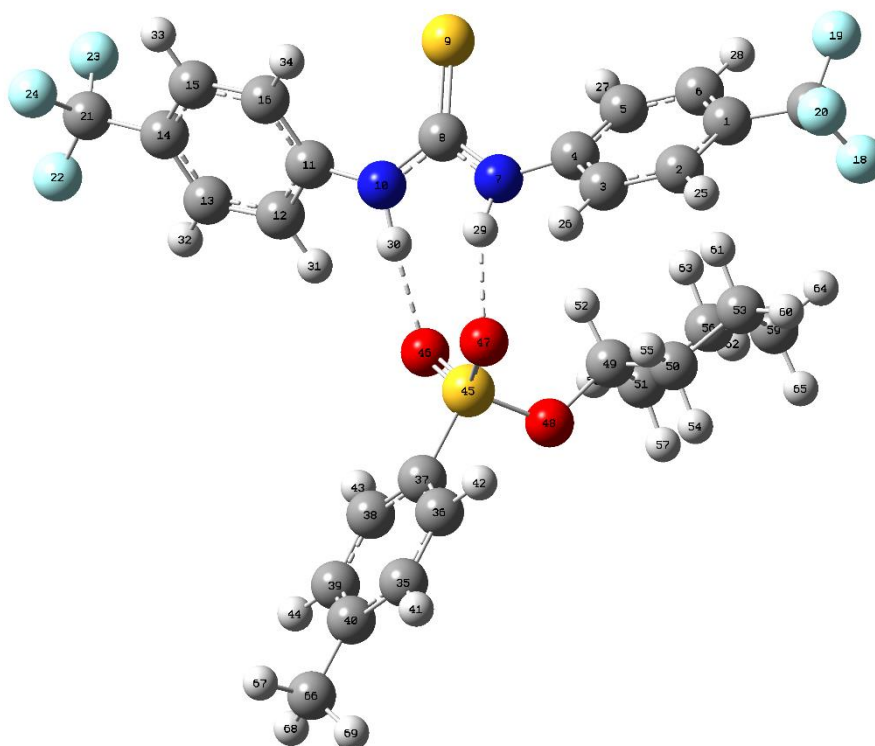

Figure S184: Output from the DFT modelling of **1:19** initiated with the O=S=O coordinated to the receptor through the formation of two hydrogen bonds, one to each oxygen atom. Total electronic energy (E(RM062X)): -2814.243328 Hartree. Binding mode 2 (see Table S39).

Table S39: Output from the DFT modelling of **1:19** initiated with the O=S=O coordinated to the receptor through the formation of two hydrogen bonds, one to each oxygen atom.

| Center Number | Atomic Number | Atomic Type | Coordinates (Angstroms) |           |           |
|---------------|---------------|-------------|-------------------------|-----------|-----------|
|               |               |             | X                       | Y         | Z         |
| 1             | 6             | 0           | 5.330103                | -1.411139 | 0.767772  |
| 2             | 6             | 0           | 4.990278                | -0.419689 | -0.145353 |
| 3             | 6             | 0           | 3.656226                | -0.195010 | -0.448875 |
| 4             | 6             | 0           | 2.656028                | -0.954862 | 0.165163  |
| 5             | 6             | 0           | 3.001566                | -1.931488 | 1.103825  |
| 6             | 6             | 0           | 4.338369                | -2.161747 | 1.391876  |
| 7             | 7             | 0           | 1.324279                | -0.626246 | -0.145676 |
| 8             | 6             | 0           | 0.228924                | -1.437694 | -0.242881 |
| 9             | 16            | 0           | 0.282676                | -3.113783 | -0.240237 |
| 10            | 7             | 0           | -0.909168               | -0.698546 | -0.346424 |
| 11            | 6             | 0           | -2.223684               | -1.138013 | -0.594345 |
| 12            | 6             | 0           | -3.251195               | -0.508005 | 0.108835  |
| 13            | 6             | 0           | -4.574288               | -0.850366 | -0.131445 |
| 14            | 6             | 0           | -4.869091               | -1.825646 | -1.075246 |
| 15            | 6             | 0           | -3.847156               | -2.446762 | -1.790091 |
| 16            | 6             | 0           | -2.525866               | -2.101595 | -1.559998 |
| 17            | 6             | 0           | 6.758240                | -1.603132 | 1.166079  |
| 18            | 9             | 0           | 7.072781                | -0.878207 | 2.257843  |
| 19            | 9             | 0           | 7.034132                | -2.879917 | 1.470149  |
| 20            | 9             | 0           | 7.612193                | -1.228933 | 0.203137  |
| 21            | 6             | 0           | -6.283208               | -2.248993 | -1.319571 |
| 22            | 9             | 0           | -7.172238               | -1.373352 | -0.832032 |
| 23            | 9             | 0           | -6.558054               | -3.436607 | -0.750040 |

|    |    |   |           |           |           |
|----|----|---|-----------|-----------|-----------|
| 24 | 9  | 0 | -6.545381 | -2.392781 | -2.628987 |
| 25 | 1  | 0 | 5.761414  | 0.171096  | -0.623715 |
| 26 | 1  | 0 | 3.379198  | 0.572657  | -1.162085 |
| 27 | 1  | 0 | 2.233208  | -2.499713 | 1.605380  |
| 28 | 1  | 0 | 4.607388  | -2.920549 | 2.116597  |
| 29 | 1  | 0 | 1.213077  | 0.323142  | -0.496933 |
| 30 | 1  | 0 | -0.846660 | 0.262194  | -0.010202 |
| 31 | 1  | 0 | -3.006581 | 0.250035  | 0.843867  |
| 32 | 1  | 0 | -5.368978 | -0.360267 | 0.415867  |
| 33 | 1  | 0 | -4.085706 | -3.188918 | -2.542527 |
| 34 | 1  | 0 | -1.733983 | -2.563048 | -2.130954 |
| 35 | 6  | 0 | 0.298931  | 6.514845  | -1.171984 |
| 36 | 6  | 0 | 0.744036  | 5.256171  | -0.801174 |
| 37 | 6  | 0 | -0.111672 | 4.445785  | -0.061294 |
| 38 | 6  | 0 | -1.384277 | 4.856727  | 0.314987  |
| 39 | 6  | 0 | -1.807008 | 6.121827  | -0.069242 |
| 40 | 6  | 0 | -0.976967 | 6.963807  | -0.813111 |
| 41 | 1  | 0 | 0.949874  | 7.160526  | -1.749904 |
| 42 | 1  | 0 | 1.727984  | 4.903765  | -1.085302 |
| 43 | 1  | 0 | -2.026735 | 4.199033  | 0.886784  |
| 44 | 1  | 0 | -2.797083 | 6.459519  | 0.213505  |
| 45 | 16 | 0 | 0.449255  | 2.858166  | 0.432615  |
| 46 | 8  | 0 | -0.680524 | 2.005041  | 0.783934  |
| 47 | 8  | 0 | 1.380820  | 2.306338  | -0.545129 |
| 48 | 8  | 0 | 1.246126  | 3.227989  | 1.750936  |
| 49 | 6  | 0 | 2.033632  | 2.144630  | 2.375893  |
| 50 | 6  | 0 | 3.502092  | 2.394020  | 2.090166  |
| 51 | 6  | 0 | 1.707678  | 2.159981  | 3.856440  |
| 52 | 1  | 0 | 1.717128  | 1.190345  | 1.937136  |
| 53 | 6  | 0 | 4.349336  | 1.351114  | 2.825325  |
| 54 | 1  | 0 | 3.752498  | 3.400681  | 2.441989  |
| 55 | 1  | 0 | 3.678155  | 2.356496  | 1.012506  |
| 56 | 6  | 0 | 2.566870  | 1.121201  | 4.586021  |
| 57 | 1  | 0 | 1.921353  | 3.161247  | 4.245329  |
| 58 | 1  | 0 | 0.642635  | 1.964429  | 3.997940  |
| 59 | 6  | 0 | 4.056501  | 1.359535  | 4.326830  |
| 60 | 1  | 0 | 5.408820  | 1.531313  | 2.631049  |
| 61 | 1  | 0 | 4.118213  | 0.358508  | 2.425186  |
| 62 | 1  | 0 | 2.348480  | 1.154832  | 5.655155  |
| 63 | 1  | 0 | 2.296543  | 0.118372  | 4.234496  |
| 64 | 1  | 0 | 4.652572  | 0.593911  | 4.829029  |
| 65 | 1  | 0 | 4.347969  | 2.327057  | 4.751332  |
| 66 | 6  | 0 | -1.453174 | 8.321475  | -1.250354 |
| 67 | 1  | 0 | -1.824196 | 8.274345  | -2.277635 |
| 68 | 1  | 0 | -2.264124 | 8.678236  | -0.615864 |
| 69 | 1  | 0 | -0.639510 | 9.047130  | -1.225596 |

---

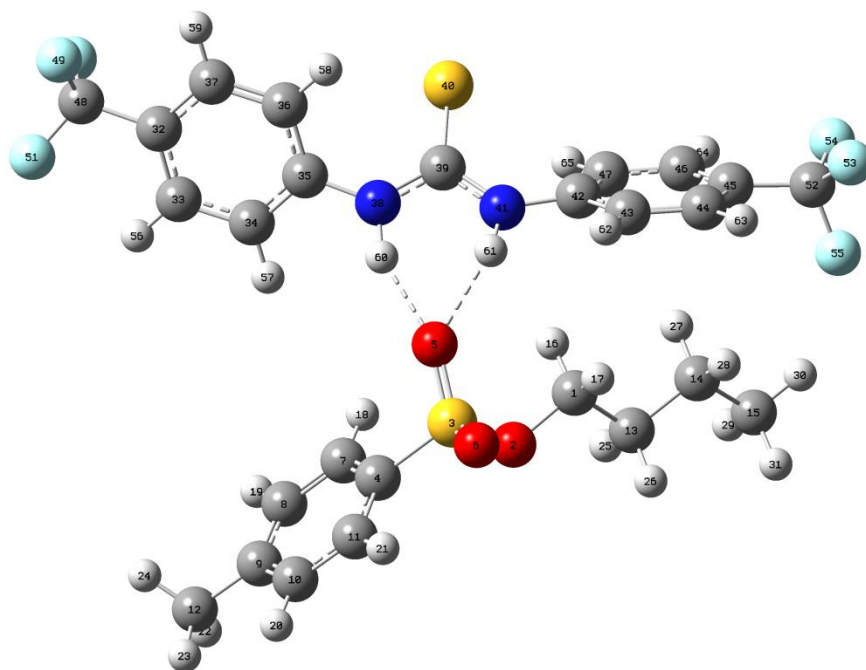

Figure S185: Output from the DFT modelling of **1:20** initiated with the S=O coordinated to the receptor through the formation of two hydrogen bonds. Total electronic energy ( $E(\text{RM062X})$ ): -2736.820519 Hartree. Binding mode 1 (see Table S40).

Table S40: Output from the DFT modelling of **1:20** initiated with the S=O coordinated to the receptor through the formation of two hydrogen bonds.

| Center Number | Atomic Number | Atomic Type | Coordinates (Angstroms) |           |          |
|---------------|---------------|-------------|-------------------------|-----------|----------|
|               |               |             | X                       | Y         | Z        |
| 1             | 6             | 0           | -1.657252               | 0.753602  | 4.165715 |
| 2             | 8             | 0           | -0.679808               | 0.109686  | 5.037747 |
| 3             | 16            | 0           | -0.033967               | -1.250056 | 4.507392 |
| 4             | 6             | 0           | 1.421335                | -1.303039 | 5.490394 |
| 5             | 8             | 0           | 0.318988                | -1.048246 | 3.102686 |
| 6             | 8             | 0           | -0.903506               | -2.361547 | 4.819549 |
| 7             | 6             | 0           | 2.424625                | -0.365449 | 5.253190 |
| 8             | 6             | 0           | 3.573149                | -0.422416 | 6.022426 |
| 9             | 6             | 0           | 3.729908                | -1.399247 | 7.015385 |
| 10            | 6             | 0           | 2.704983                | -2.321584 | 7.223475 |
| 11            | 6             | 0           | 1.540131                | -2.282448 | 6.464934 |
| 12            | 6             | 0           | 4.992940                | -1.443369 | 7.830389 |
| 13            | 6             | 0           | -2.305914               | 1.868437  | 4.951394 |
| 14            | 6             | 0           | -3.329026               | 2.605897  | 4.086635 |
| 15            | 6             | 0           | -3.943282               | 3.795369  | 4.819020 |
| 16            | 1             | 0           | -1.121121               | 1.142196  | 3.297846 |
| 17            | 1             | 0           | -2.393451               | 0.010525  | 3.845740 |
| 18            | 1             | 0           | 2.305494                | 0.389288  | 4.484852 |
| 19            | 1             | 0           | 4.364496                | 0.299068  | 5.853949 |
| 20            | 1             | 0           | 2.814959                | -3.081558 | 7.987831 |
| 21            | 1             | 0           | 0.742343                | -2.997123 | 6.622120 |
| 22            | 1             | 0           | 5.174639                | -0.478199 | 8.307420 |
| 23            | 1             | 0           | 4.939374                | -2.209224 | 8.603154 |
| 24            | 1             | 0           | 5.850847                | -1.658485 | 7.189209 |
| 25            | 1             | 0           | -1.530237               | 2.562439  | 5.288265 |
| 26            | 1             | 0           | -2.789223               | 1.452768  | 5.839707 |

|    |    |   |           |           |           |
|----|----|---|-----------|-----------|-----------|
| 27 | 1  | 0 | -2.845498 | 2.947430  | 3.164715  |
| 28 | 1  | 0 | -4.118033 | 1.911250  | 3.781014  |
| 29 | 1  | 0 | -3.172610 | 4.517071  | 5.100809  |
| 30 | 1  | 0 | -4.673847 | 4.305647  | 4.190183  |
| 31 | 1  | 0 | -4.448308 | 3.470299  | 5.732076  |
| 32 | 6  | 0 | 5.439508  | -1.090094 | -0.859790 |
| 33 | 6  | 0 | 5.269863  | -0.682989 | 0.456967  |
| 34 | 6  | 0 | 3.998437  | -0.370330 | 0.919206  |
| 35 | 6  | 0 | 2.899991  | -0.470388 | 0.067216  |
| 36 | 6  | 0 | 3.072382  | -0.902170 | -1.249582 |
| 37 | 6  | 0 | 4.342944  | -1.201713 | -1.711809 |
| 38 | 7  | 0 | 1.619416  | -0.203449 | 0.599791  |
| 39 | 6  | 0 | 0.621234  | 0.530721  | 0.038758  |
| 40 | 16 | 0 | 0.783511  | 1.425658  | -1.374954 |
| 41 | 7  | 0 | -0.527888 | 0.442983  | 0.763539  |
| 42 | 6  | 0 | -1.728200 | 1.169141  | 0.628641  |
| 43 | 6  | 0 | -2.919824 | 0.482512  | 0.877164  |
| 44 | 6  | 0 | -4.130172 | 1.157107  | 0.859789  |
| 45 | 6  | 0 | -4.153223 | 2.519623  | 0.582793  |
| 46 | 6  | 0 | -2.971180 | 3.207241  | 0.330388  |
| 47 | 6  | 0 | -1.755643 | 2.538687  | 0.360246  |
| 48 | 6  | 0 | 6.808936  | -1.375047 | -1.392812 |
| 49 | 9  | 0 | 6.811803  | -2.412961 | -2.243844 |
| 50 | 9  | 0 | 7.310682  | -0.328317 | -2.072849 |
| 51 | 9  | 0 | 7.687025  | -1.656928 | -0.420524 |
| 52 | 6  | 0 | -5.452484 | 3.256640  | 0.654100  |
| 53 | 9  | 0 | -6.477586 | 2.524736  | 0.193265  |
| 54 | 9  | 0 | -5.432670 | 4.399998  | -0.042976 |
| 55 | 9  | 0 | -5.766205 | 3.586788  | 1.923287  |
| 56 | 1  | 0 | 6.121805  | -0.607072 | 1.120246  |
| 57 | 1  | 0 | 3.856030  | -0.044286 | 1.942330  |
| 58 | 1  | 0 | 2.214350  | -1.012676 | -1.896718 |
| 59 | 1  | 0 | 4.479808  | -1.543437 | -2.730473 |
| 60 | 1  | 0 | 1.469070  | -0.516935 | 1.556067  |
| 61 | 1  | 0 | -0.544729 | -0.279977 | 1.479093  |
| 62 | 1  | 0 | -2.890775 | -0.581730 | 1.080999  |
| 63 | 1  | 0 | -5.051846 | 0.622755  | 1.055274  |
| 64 | 1  | 0 | -2.994239 | 4.270634  | 0.127608  |
| 65 | 1  | 0 | -0.834639 | 3.076105  | 0.191161  |

---

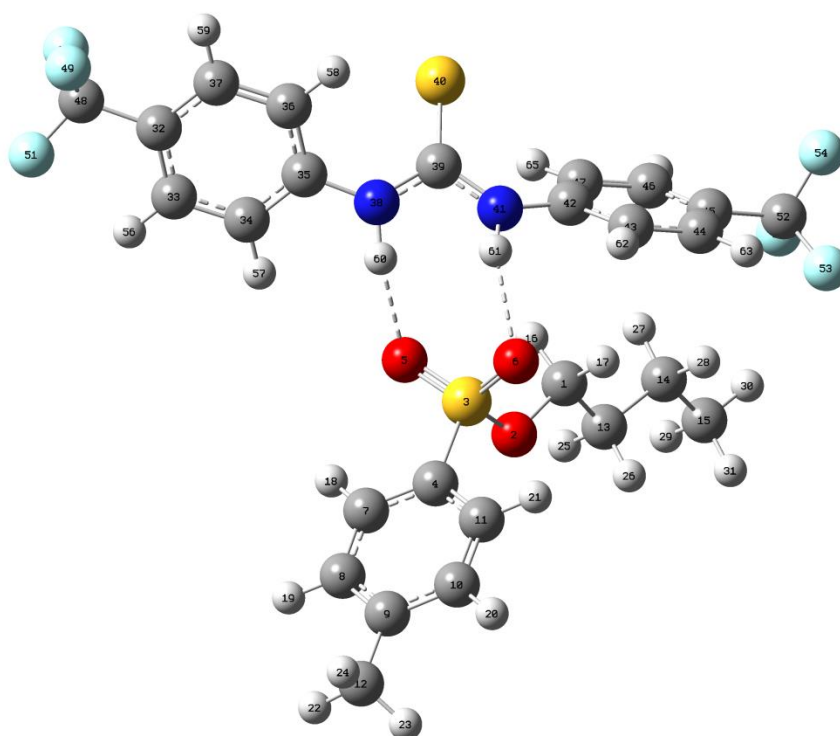

Figure S186: Output from the DFT modelling of **1:20** initiated with the O=S=O coordinated to the receptor through the formation of two hydrogen bonds, one to each oxygen atom. Total electronic energy (E(RM062X)): -2736.821915 Hartree. Binding mode 2 (see Table S41).

Table S41: Output from the DFT modelling of **1:20** initiated with the O=S=O coordinated to the receptor through the formation of two hydrogen bonds, one to each oxygen atom.

| Center Number | Atomic Number | Atomic Type | Coordinates (Angstroms) |           |          |
|---------------|---------------|-------------|-------------------------|-----------|----------|
|               |               |             | X                       | Y         | Z        |
| 1             | 6             | 0           | -1.721592               | 1.759875  | 3.637641 |
| 2             | 8             | 0           | -0.880823               | 1.016306  | 4.576316 |
| 3             | 16            | 0           | -0.109933               | -0.249629 | 3.995356 |
| 4             | 6             | 0           | 0.376090                | -1.032806 | 5.489566 |
| 5             | 8             | 0           | 1.063398                | 0.200137  | 3.257688 |
| 6             | 8             | 0           | -1.059270               | -1.073763 | 3.259135 |
| 7             | 6             | 0           | 1.647042                | -0.792641 | 5.995174 |
| 8             | 6             | 0           | 2.009303                | -1.409575 | 7.185459 |
| 9             | 6             | 0           | 1.121271                | -2.249212 | 7.860766 |
| 10            | 6             | 0           | -0.151703               | -2.466247 | 7.320259 |
| 11            | 6             | 0           | -0.536608               | -1.862583 | 6.134625 |
| 12            | 6             | 0           | 1.526624                | -2.935657 | 9.135841 |
| 13            | 6             | 0           | -2.366194               | 2.889012  | 4.408190 |
| 14            | 6             | 0           | -3.381932               | 3.622030  | 3.531082 |
| 15            | 6             | 0           | -4.033432               | 4.794411  | 4.257858 |
| 16            | 1             | 0           | -1.089508               | 2.129049  | 2.825574 |
| 17            | 1             | 0           | -2.469545               | 1.072374  | 3.237793 |
| 18            | 1             | 0           | 2.335257                | -0.145684 | 5.465988 |
| 19            | 1             | 0           | 2.997442                | -1.235484 | 7.594564 |
| 20            | 1             | 0           | -0.847203               | -3.117575 | 7.836792 |
| 21            | 1             | 0           | -1.517856               | -2.036090 | 5.710341 |
| 22            | 1             | 0           | 2.400609                | -2.460397 | 9.580177 |
| 23            | 1             | 0           | 0.711130                | -2.922309 | 9.860239 |

|    |    |   |           |           |           |
|----|----|---|-----------|-----------|-----------|
| 24 | 1  | 0 | 1.773495  | -3.981605 | 8.936050  |
| 25 | 1  | 0 | -1.595339 | 3.581280  | 4.757631  |
| 26 | 1  | 0 | -2.866084 | 2.475008  | 5.288711  |
| 27 | 1  | 0 | -2.890199 | 3.978177  | 2.619910  |
| 28 | 1  | 0 | -4.152961 | 2.913779  | 3.210126  |
| 29 | 1  | 0 | -3.285406 | 5.534133  | 4.552937  |
| 30 | 1  | 0 | -4.766731 | 5.289384  | 3.618882  |
| 31 | 1  | 0 | -4.545469 | 4.454793  | 5.161525  |
| 32 | 6  | 0 | 5.478874  | -1.112665 | -0.871789 |
| 33 | 6  | 0 | 5.233644  | -0.525837 | 0.362729  |
| 34 | 6  | 0 | 3.924911  | -0.295061 | 0.763356  |
| 35 | 6  | 0 | 2.864047  | -0.653312 | -0.067931 |
| 36 | 6  | 0 | 3.114031  | -1.262777 | -1.299841 |
| 37 | 6  | 0 | 4.421071  | -1.482687 | -1.700135 |
| 38 | 7  | 0 | 1.557577  | -0.451220 | 0.416622  |
| 39 | 6  | 0 | 0.479509  | 0.039751  | -0.256281 |
| 40 | 16 | 0 | 0.524104  | 0.685064  | -1.803219 |
| 41 | 7  | 0 | -0.652257 | -0.070144 | 0.496080  |
| 42 | 6  | 0 | -1.871677 | 0.619969  | 0.375191  |
| 43 | 6  | 0 | -3.027884 | -0.042293 | 0.792817  |
| 44 | 6  | 0 | -4.236492 | 0.636529  | 0.851645  |
| 45 | 6  | 0 | -4.291192 | 1.975613  | 0.482925  |
| 46 | 6  | 0 | -3.146312 | 2.630853  | 0.037437  |
| 47 | 6  | 0 | -1.935068 | 1.961014  | -0.011961 |
| 48 | 6  | 0 | 6.880470  | -1.328300 | -1.349253 |
| 49 | 9  | 0 | 7.034188  | -2.529979 | -1.928928 |
| 50 | 9  | 0 | 7.243131  | -0.418228 | -2.271526 |
| 51 | 9  | 0 | 7.777715  | -1.249849 | -0.357400 |
| 52 | 6  | 0 | -5.584900 | 2.724057  | 0.557630  |
| 53 | 9  | 0 | -6.408372 | 2.214816  | 1.486606  |
| 54 | 9  | 0 | -6.258537 | 2.705434  | -0.604792 |
| 55 | 9  | 0 | -5.396353 | 4.018102  | 0.866568  |
| 56 | 1  | 0 | 6.055586  | -0.247394 | 1.009389  |
| 57 | 1  | 0 | 3.719109  | 0.166626  | 1.722189  |
| 58 | 1  | 0 | 2.290206  | -1.570307 | -1.927439 |
| 59 | 1  | 0 | 4.619430  | -1.960990 | -2.651798 |
| 60 | 1  | 0 | 1.476161  | -0.427752 | 1.432150  |
| 61 | 1  | 0 | -0.630737 | -0.734797 | 1.265193  |
| 62 | 1  | 0 | -2.966330 | -1.079152 | 1.100932  |
| 63 | 1  | 0 | -5.126491 | 0.128200  | 1.200662  |
| 64 | 1  | 0 | -3.192154 | 3.678473  | -0.234163 |
| 65 | 1  | 0 | -1.037594 | 2.481036  | -0.313916 |

---

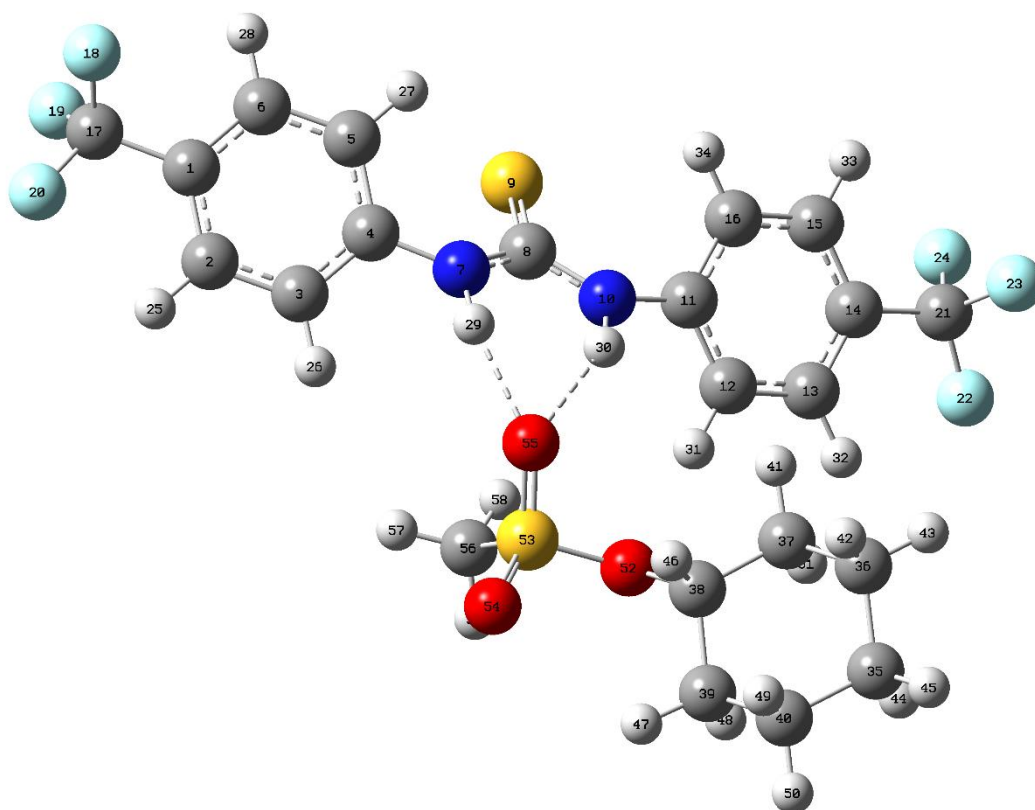

Figure S187: Output from the DFT modelling of **1:25** initiated with the S=O coordinated to the receptor through the formation of two hydrogen bonds. Total electronic energy (E(RM062X)): -2583.227849 Hartree. Binding mode 1 (see Table S42).

Table S42: Output from the DFT modelling of **1:25** initiated with the S=O coordinated to the receptor through the formation of two hydrogen bonds.

| Center Number | Atomic Number | Atomic Type | Coordinates (Angstroms) |          |           |
|---------------|---------------|-------------|-------------------------|----------|-----------|
|               |               |             | X                       | Y        | Z         |
| 1             | 6             | 0           | 4.587660                | 4.474057 | -1.742846 |
| 2             | 6             | 0           | 4.302453                | 4.660770 | -0.396992 |
| 3             | 6             | 0           | 3.079903                | 4.239788 | 0.107943  |
| 4             | 6             | 0           | 2.145205                | 3.630734 | -0.728952 |
| 5             | 6             | 0           | 2.446451                | 3.423094 | -2.077502 |
| 6             | 6             | 0           | 3.662855                | 3.853408 | -2.580179 |
| 7             | 7             | 0           | 0.950919                | 3.164861 | -0.141944 |
| 8             | 6             | 0           | -0.318972               | 3.249992 | -0.623846 |
| 9             | 16            | 0           | -0.743561               | 4.035856 | -2.049751 |
| 10            | 7             | 0           | -1.215836               | 2.667057 | 0.216755  |
| 11            | 6             | 0           | -2.622026               | 2.612753 | 0.077108  |
| 12            | 6             | 0           | -3.403123               | 2.967691 | 1.174508  |
| 13            | 6             | 0           | -4.787354               | 2.867150 | 1.106829  |
| 14            | 6             | 0           | -5.383706               | 2.423209 | -0.064904 |
| 15            | 6             | 0           | -4.605010               | 2.059009 | -1.162324 |
| 16            | 6             | 0           | -3.224894               | 2.144392 | -1.092101 |
| 17            | 6             | 0           | 5.879381                | 4.954312 | -2.326124 |
| 18            | 9             | 0           | 6.445222                | 4.030047 | -3.119881 |
| 19            | 9             | 0           | 5.709847                | 6.049477 | -3.088706 |
| 20            | 9             | 0           | 6.779408                | 5.273251 | -1.386735 |
| 21            | 6             | 0           | -6.871241               | 2.285162 | -0.162984 |



|    |    |   |           |           |           |
|----|----|---|-----------|-----------|-----------|
| 22 | 9  | 0 | -7.509969 | 2.871556  | 0.857509  |
| 23 | 9  | 0 | -7.254829 | 0.996076  | -0.172814 |
| 24 | 9  | 0 | -7.350293 | 2.826829  | -1.294622 |
| 25 | 1  | 0 | 5.024879  | 5.132846  | 0.255928  |
| 26 | 1  | 0 | 2.846509  | 4.382265  | 1.156407  |
| 27 | 1  | 0 | 1.738458  | 2.918567  | -2.717821 |
| 28 | 1  | 0 | 3.901962  | 3.687757  | -3.623917 |
| 29 | 1  | 0 | 1.040053  | 2.883142  | 0.831670  |
| 30 | 1  | 0 | -0.861616 | 2.385574  | 1.127693  |
| 31 | 1  | 0 | -2.927788 | 3.319217  | 2.083194  |
| 32 | 1  | 0 | -5.393686 | 3.145078  | 1.959269  |
| 33 | 1  | 0 | -5.077882 | 1.700276  | -2.068888 |
| 34 | 1  | 0 | -2.612344 | 1.843884  | -1.929773 |
| 35 | 6  | 0 | -3.619825 | 0.426064  | 6.559241  |
| 36 | 6  | 0 | -3.344276 | 0.062633  | 5.098391  |
| 37 | 6  | 0 | -2.931048 | 1.296664  | 4.288604  |
| 38 | 6  | 0 | -1.735915 | 1.963522  | 4.941577  |
| 39 | 6  | 0 | -1.990174 | 2.345633  | 6.387930  |
| 40 | 6  | 0 | -2.403620 | 1.107533  | 7.190382  |
| 41 | 1  | 0 | -2.684605 | 1.025398  | 3.259314  |
| 42 | 1  | 0 | -2.541194 | -0.681818 | 5.056031  |
| 43 | 1  | 0 | -4.224858 | -0.392181 | 4.640609  |
| 44 | 1  | 0 | -4.478771 | 1.105183  | 6.606417  |
| 45 | 1  | 0 | -3.886144 | -0.469645 | 7.124851  |
| 46 | 1  | 0 | -0.859390 | 1.311198  | 4.866674  |
| 47 | 1  | 0 | -1.094477 | 2.808208  | 6.806952  |
| 48 | 1  | 0 | -2.795368 | 3.087938  | 6.406307  |
| 49 | 1  | 0 | -1.567356 | 0.399897  | 7.222224  |
| 50 | 1  | 0 | -2.615432 | 1.396590  | 8.221634  |
| 51 | 1  | 0 | -3.756830 | 2.016679  | 4.257802  |
| 52 | 8  | 0 | -1.457713 | 3.196469  | 4.177205  |
| 53 | 16 | 0 | 0.063437  | 3.495669  | 3.822765  |
| 54 | 8  | 0 | 0.885927  | 3.394005  | 5.008471  |
| 55 | 8  | 0 | 0.434227  | 2.644726  | 2.691223  |
| 56 | 6  | 0 | -0.093749 | 5.172727  | 3.291595  |
| 57 | 1  | 0 | 0.906328  | 5.503712  | 3.016446  |
| 58 | 1  | 0 | -0.764433 | 5.206088  | 2.435497  |
| 59 | 1  | 0 | -0.479964 | 5.751942  | 4.126845  |

---

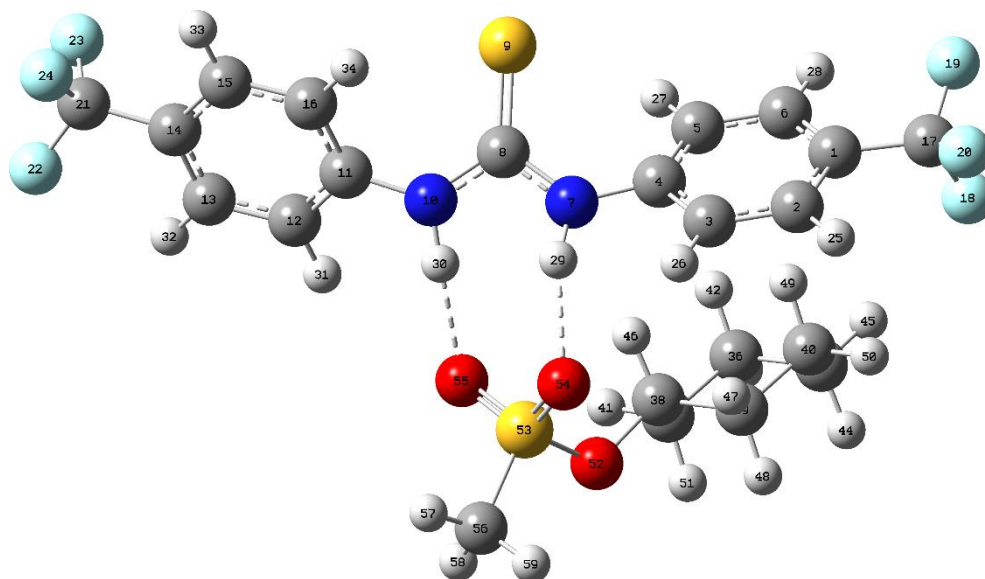

Figure S188: Output from the DFT modelling of **1:25** initiated with the O=S=O coordinated to the receptor through the formation of two hydrogen bonds, one to each oxygen atom. Total electronic energy (E(RM062X)): -2583.235441 Hartree. Binding mode 2 (see Table S43).

Table S43: Output from the DFT modelling of **1:25** initiated with the O=S=O coordinated to the receptor through the formation of two hydrogen bonds, one to each oxygen atom.

| Center Number | Atomic Number | Atomic Type | Coordinates (Angstroms) |           |           |
|---------------|---------------|-------------|-------------------------|-----------|-----------|
|               |               |             | X                       | Y         | Z         |
| 1             | 6             | 0           | 3.558243                | 1.463774  | 0.179305  |
| 2             | 6             | 0           | 3.358702                | 2.805926  | 0.481451  |
| 3             | 6             | 0           | 2.076604                | 3.332917  | 0.447012  |
| 4             | 6             | 0           | 0.988968                | 2.518230  | 0.119117  |
| 5             | 6             | 0           | 1.191969                | 1.163618  | -0.159082 |
| 6             | 6             | 0           | 2.478077                | 0.645608  | -0.137693 |
| 7             | 7             | 0           | -0.288458               | 3.104572  | 0.170438  |
| 8             | 6             | 0           | -1.380546               | 2.868926  | -0.615901 |
| 9             | 16            | 0           | -1.358634               | 1.960388  | -2.025876 |
| 10            | 7             | 0           | -2.484211               | 3.476423  | -0.101272 |
| 11            | 6             | 0           | -3.768696               | 3.593219  | -0.665377 |
| 12            | 6             | 0           | -4.858505               | 3.465476  | 0.197708  |
| 13            | 6             | 0           | -6.150194               | 3.630746  | -0.279805 |
| 14            | 6             | 0           | -6.353004               | 3.922726  | -1.623224 |
| 15            | 6             | 0           | -5.268132               | 4.064470  | -2.484713 |
| 16            | 6             | 0           | -3.975754               | 3.909469  | -2.010019 |
| 17            | 6             | 0           | 4.923169                | 0.866286  | 0.302163  |
| 18            | 9             | 0           | 5.135433                | 0.359398  | 1.532990  |
| 19            | 9             | 0           | 5.116232                | -0.143251 | -0.559100 |
| 20            | 9             | 0           | 5.895420                | 1.764004  | 0.089121  |
| 21            | 6             | 0           | -7.741126               | 4.048612  | -2.167417 |
| 22            | 9             | 0           | -8.635969               | 4.353512  | -1.216975 |
| 23            | 9             | 0           | -8.163921               | 2.906507  | -2.739705 |
| 24            | 9             | 0           | -7.827735               | 4.997261  | -3.113207 |
| 25            | 1             | 0           | 4.198672                | 3.439945  | 0.736660  |
| 26            | 1             | 0           | 1.907723                | 4.378810  | 0.676128  |
| 27            | 1             | 0           | 0.352126                | 0.523537  | -0.383546 |
| 28            | 1             | 0           | 2.637592                | -0.403540 | -0.354701 |

|    |    |   |           |           |           |
|----|----|---|-----------|-----------|-----------|
| 29 | 1  | 0 | -0.337835 | 3.920638  | 0.778315  |
| 30 | 1  | 0 | -2.442317 | 3.705972  | 0.891768  |
| 31 | 1  | 0 | -4.685723 | 3.236887  | 1.243038  |
| 32 | 1  | 0 | -6.993238 | 3.532213  | 0.391955  |
| 33 | 1  | 0 | -5.431932 | 4.316654  | -3.525293 |
| 34 | 1  | 0 | -3.132309 | 4.045706  | -2.670302 |
| 35 | 6  | 0 | 2.019478  | 0.240383  | 4.411682  |
| 36 | 6  | 0 | 0.508435  | 0.014119  | 4.319666  |
| 37 | 6  | 0 | -0.263931 | 1.268225  | 4.744341  |
| 38 | 6  | 0 | 0.182003  | 2.452014  | 3.908796  |
| 39 | 6  | 0 | 1.674865  | 2.707097  | 3.994394  |
| 40 | 6  | 0 | 2.434030  | 1.447191  | 3.568213  |
| 41 | 1  | 0 | -1.341135 | 1.128001  | 4.632955  |
| 42 | 1  | 0 | 0.245240  | -0.238891 | 3.285737  |
| 43 | 1  | 0 | 0.203161  | -0.828840 | 4.942616  |
| 44 | 1  | 0 | 2.297597  | 0.411623  | 5.457903  |
| 45 | 1  | 0 | 2.554142  | -0.651809 | 4.077242  |
| 46 | 1  | 0 | -0.121613 | 2.303313  | 2.865092  |
| 47 | 1  | 0 | 1.939023  | 3.559212  | 3.363894  |
| 48 | 1  | 0 | 1.918150  | 2.961999  | 5.031547  |
| 49 | 1  | 0 | 2.212947  | 1.236610  | 2.516789  |
| 50 | 1  | 0 | 3.509878  | 1.622538  | 3.635593  |
| 51 | 1  | 0 | -0.060235 | 1.493916  | 5.796493  |
| 52 | 8  | 0 | -0.527085 | 3.636613  | 4.433187  |
| 53 | 16 | 0 | -1.174255 | 4.610576  | 3.367699  |
| 54 | 8  | 0 | -0.161029 | 5.027238  | 2.404203  |
| 55 | 8  | 0 | -2.355887 | 3.979113  | 2.789307  |
| 56 | 6  | 0 | -1.631845 | 5.939538  | 4.430520  |
| 57 | 1  | 0 | -2.121118 | 6.681432  | 3.802131  |
| 58 | 1  | 0 | -2.314740 | 5.546956  | 5.180311  |
| 59 | 1  | 0 | -0.724668 | 6.337170  | 4.878998  |

-----

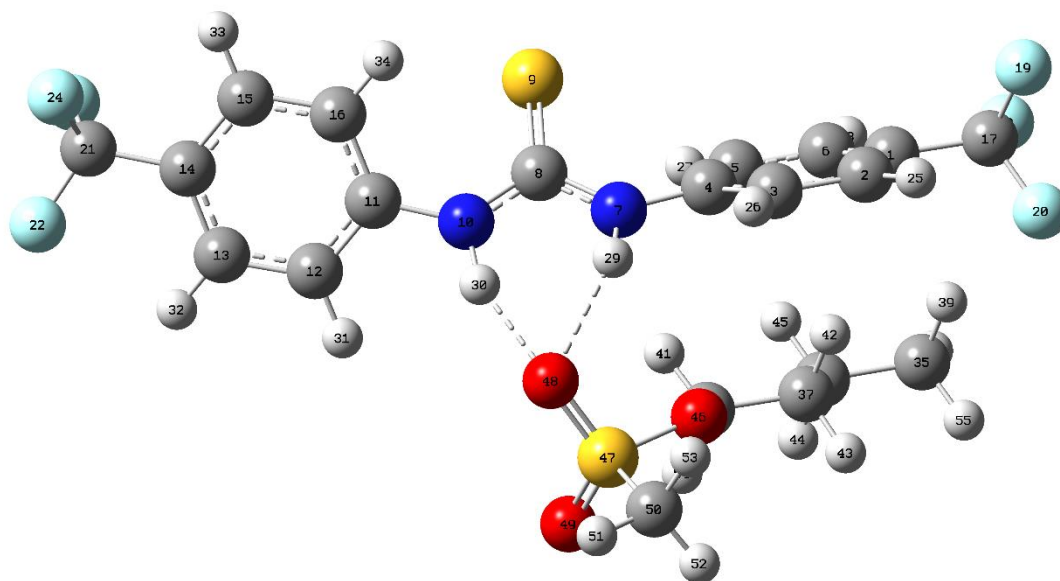

Figure S189: Output from the DFT modelling of **1:26** initiated with the S=O coordinated to the receptor through the formation of two hydrogen bonds. Total electronic energy (E(RM062X)): -2505.815519 Hartree. Binding mode 1 (see Table S44).

Table S44: Output from the DFT modelling of **1:26** initiated with the O=S=O coordinated to the receptor through the formation of two hydrogen bonds.

| Center Number | Atomic Number | Atomic Type | Coordinates (Angstroms) |          |           |
|---------------|---------------|-------------|-------------------------|----------|-----------|
|               |               |             | X                       | Y        | Z         |
| 1             | 6             | 0           | 4.112487                | 2.182030 | 0.312863  |
| 2             | 6             | 0           | 3.937873                | 3.453413 | 0.854444  |
| 3             | 6             | 0           | 2.658344                | 3.933747 | 1.076707  |
| 4             | 6             | 0           | 1.547390                | 3.145322 | 0.761444  |
| 5             | 6             | 0           | 1.727775                | 1.868005 | 0.230925  |
| 6             | 6             | 0           | 3.012239                | 1.393169 | 0.000615  |
| 7             | 7             | 0           | 0.276275                | 3.654541 | 1.091767  |
| 8             | 6             | 0           | -0.898696               | 3.545260 | 0.407731  |
| 9             | 16            | 0           | -1.036290               | 2.908166 | -1.141076 |
| 10            | 7             | 0           | -1.941839               | 4.019219 | 1.137788  |
| 11            | 6             | 0           | -3.285723               | 4.169354 | 0.731538  |
| 12            | 6             | 0           | -4.282737               | 3.754108 | 1.612142  |
| 13            | 6             | 0           | -5.620452               | 3.936290 | 1.286664  |
| 14            | 6             | 0           | -5.955986               | 4.529721 | 0.077181  |
| 15            | 6             | 0           | -4.961871               | 4.956459 | -0.801186 |
| 16            | 6             | 0           | -3.627286               | 4.786373 | -0.473923 |
| 17            | 6             | 0           | 5.506660                | 1.680456 | 0.102008  |
| 18            | 9             | 0           | 5.536101                | 0.433443 | -0.385584 |
| 19            | 9             | 0           | 6.200768                | 2.454164 | -0.747484 |
| 20            | 9             | 0           | 6.205178                | 1.665862 | 1.252651  |
| 21            | 6             | 0           | -7.389948               | 4.691152 | -0.320693 |
| 22            | 9             | 0           | -8.227002               | 4.567418 | 0.717695  |
| 23            | 9             | 0           | -7.764101               | 3.773954 | -1.230942 |
| 24            | 9             | 0           | -7.624151               | 5.889955 | -0.878665 |
| 25            | 1             | 0           | 4.796864                | 4.065660 | 1.102395  |
| 26            | 1             | 0           | 2.510660                | 4.921820 | 1.495936  |
| 27            | 1             | 0           | 0.872508                | 1.245037 | 0.013499  |
| 28            | 1             | 0           | 3.152446                | 0.398035 | -0.402452 |

|    |    |   |           |           |           |
|----|----|---|-----------|-----------|-----------|
| 29 | 1  | 0 | 0.252057  | 4.239622  | 1.922324  |
| 30 | 1  | 0 | -1.764293 | 4.171067  | 2.129098  |
| 31 | 1  | 0 | -4.007584 | 3.284754  | 2.549108  |
| 32 | 1  | 0 | -6.394018 | 3.613955  | 1.971441  |
| 33 | 1  | 0 | -5.231715 | 5.440499  | -1.732056 |
| 34 | 1  | 0 | -2.851047 | 5.138556  | -1.137638 |
| 35 | 6  | 0 | 3.862396  | -0.882332 | 2.800719  |
| 36 | 6  | 0 | 1.060493  | 1.604317  | 3.760383  |
| 37 | 6  | 0 | 2.463817  | 1.084878  | 3.544984  |
| 38 | 6  | 0 | 2.449193  | -0.356507 | 3.038015  |
| 39 | 1  | 0 | 4.388789  | -0.263039 | 2.070072  |
| 40 | 1  | 0 | 3.847265  | -1.906988 | 2.425883  |
| 41 | 1  | 0 | 0.463473  | 1.561611  | 2.845640  |
| 42 | 1  | 0 | 2.978252  | 1.725644  | 2.823397  |
| 43 | 1  | 0 | 3.012355  | 1.145683  | 4.489504  |
| 44 | 1  | 0 | 1.932936  | -0.995003 | 3.761747  |
| 45 | 1  | 0 | 1.875118  | -0.406813 | 2.107036  |
| 46 | 8  | 0 | 1.190393  | 3.007361  | 4.151181  |
| 47 | 16 | 0 | -0.065175 | 3.753547  | 4.796492  |
| 48 | 8  | 0 | -0.721313 | 4.518862  | 3.738860  |
| 49 | 8  | 0 | -0.874447 | 2.809709  | 5.535763  |
| 50 | 6  | 0 | 0.779663  | 4.868415  | 5.872342  |
| 51 | 1  | 0 | 0.017054  | 5.496676  | 6.328891  |
| 52 | 1  | 0 | 1.306234  | 4.278766  | 6.618725  |
| 53 | 1  | 0 | 1.465170  | 5.459518  | 5.269451  |
| 54 | 1  | 0 | 0.546643  | 1.068642  | 4.559490  |
| 55 | 1  | 0 | 4.441939  | -0.868157 | 3.726996  |

---

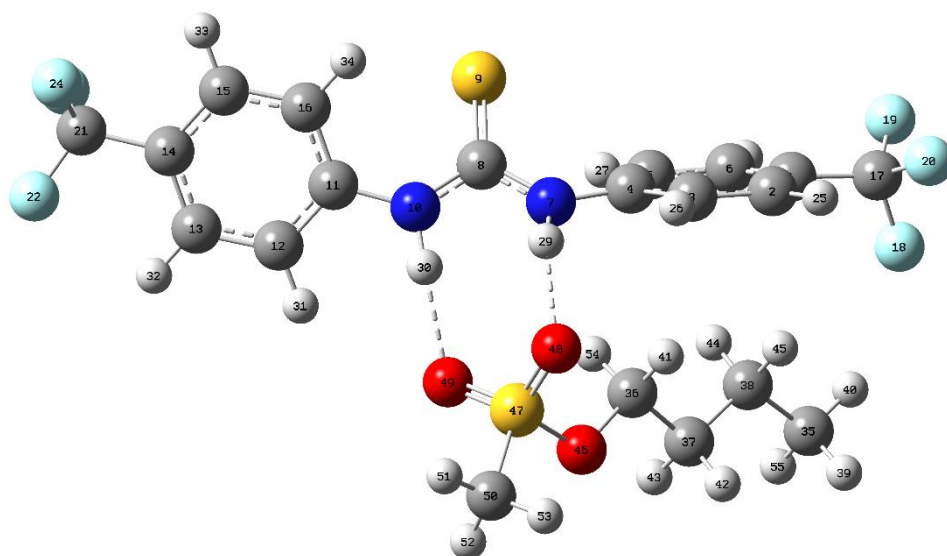

Figure S190: Output from the DFT modelling of **1:26** initiated with the O=S=O coordinated to the receptor through the formation of two hydrogen bonds, one to each oxygen atom. Total electronic energy (E(RM062X)): -2505.814231 Hartree. Binding mode 2 (see Table S45).

Table S45: Output from the DFT modelling of **1:26** initiated with the O=S=O coordinated to the receptor through the formation of two hydrogen bonds, one to each oxygen atom.

| Center Number | Atomic Number | Atomic Type | Coordinates (Angstroms) |          |           |
|---------------|---------------|-------------|-------------------------|----------|-----------|
|               |               |             | X                       | Y        | Z         |
| 1             | 6             | 0           | 4.054197                | 2.119673 | 0.307702  |
| 2             | 6             | 0           | 3.922147                | 3.298130 | 1.031698  |
| 3             | 6             | 0           | 2.664335                | 3.859456 | 1.204170  |
| 4             | 6             | 0           | 1.537315                | 3.235057 | 0.666524  |
| 5             | 6             | 0           | 1.674624                | 2.044615 | -0.052522 |
| 6             | 6             | 0           | 2.933437                | 1.497194 | -0.236073 |
| 7             | 7             | 0           | 0.278816                | 3.782345 | 0.977501  |
| 8             | 6             | 0           | -0.839920               | 3.851050 | 0.197087  |
| 9             | 16            | 0           | -0.850535               | 3.596670 | -1.460241 |
| 10            | 7             | 0           | -1.934690               | 4.156486 | 0.946508  |
| 11            | 6             | 0           | -3.240153               | 4.449886 | 0.509137  |
| 12            | 6             | 0           | -4.297596               | 3.924223 | 1.252494  |
| 13            | 6             | 0           | -5.608307               | 4.224588 | 0.910232  |
| 14            | 6             | 0           | -5.860663               | 5.050380 | -0.177834 |
| 15            | 6             | 0           | -4.807219               | 5.588072 | -0.914200 |
| 16            | 6             | 0           | -3.497269               | 5.298187 | -0.570732 |
| 17            | 6             | 0           | 5.387137                | 1.453823 | 0.177197  |
| 18            | 9             | 0           | 5.531931                | 0.451138 | 1.067317  |
| 19            | 9             | 0           | 5.562515                | 0.905593 | -1.034491 |
| 20            | 9             | 0           | 6.405750                | 2.298234 | 0.384398  |
| 21            | 6             | 0           | -7.265272               | 5.349204 | -0.597925 |
| 22            | 9             | 0           | -8.155994               | 5.084018 | 0.367237  |
| 23            | 9             | 0           | -7.633901               | 4.627320 | -1.671919 |
| 24            | 9             | 0           | -7.424048               | 6.637908 | -0.940974 |
| 25            | 1             | 0           | 4.793673                | 3.780712 | 1.455234  |
| 26            | 1             | 0           | 2.547872                | 4.778824 | 1.766232  |
| 27            | 1             | 0           | 0.800964                | 1.546567 | -0.447101 |
| 28            | 1             | 0           | 3.041337                | 0.571283 | -0.788366 |

|    |    |   |           |           |           |
|----|----|---|-----------|-----------|-----------|
| 29 | 1  | 0 | 0.242973  | 4.269447  | 1.871089  |
| 30 | 1  | 0 | -1.869202 | 3.914869  | 1.934988  |
| 31 | 1  | 0 | -4.085316 | 3.279709  | 2.097806  |
| 32 | 1  | 0 | -6.426724 | 3.815672  | 1.488443  |
| 33 | 1  | 0 | -5.010761 | 6.250604  | -1.746861 |
| 34 | 1  | 0 | -2.678307 | 5.733140  | -1.124325 |
| 35 | 6  | 0 | 3.553361  | -1.376263 | 3.389512  |
| 36 | 6  | 0 | 1.125288  | 1.613273  | 3.625251  |
| 37 | 6  | 0 | 1.826875  | 0.353477  | 4.072411  |
| 38 | 6  | 0 | 2.778895  | -0.128351 | 2.977104  |
| 39 | 1  | 0 | 4.144818  | -1.185991 | 4.288514  |
| 40 | 1  | 0 | 4.235056  | -1.690673 | 2.597536  |
| 41 | 1  | 0 | 1.843674  | 2.397362  | 3.379271  |
| 42 | 1  | 0 | 2.387142  | 0.566197  | 4.987572  |
| 43 | 1  | 0 | 1.087973  | -0.418329 | 4.303932  |
| 44 | 1  | 0 | 2.210348  | -0.329817 | 2.063286  |
| 45 | 1  | 0 | 3.481084  | 0.674908  | 2.731952  |
| 46 | 8  | 0 | 0.306187  | 2.090068  | 4.738625  |
| 47 | 16 | 0 | -0.528038 | 3.415317  | 4.464299  |
| 48 | 8  | 0 | 0.350154  | 4.419870  | 3.877793  |
| 49 | 8  | 0 | -1.714708 | 3.086575  | 3.683509  |
| 50 | 6  | 0 | -0.965605 | 3.831514  | 6.119339  |
| 51 | 1  | 0 | -1.581342 | 4.726907  | 6.057088  |
| 52 | 1  | 0 | -1.526033 | 2.997885  | 6.536120  |
| 53 | 1  | 0 | -0.048448 | 4.019049  | 6.672093  |
| 54 | 1  | 0 | 0.470178  | 1.431113  | 2.768197  |
| 55 | 1  | 0 | 2.873984  | -2.205087 | 3.602839  |

---

## Exhaustive parameter search

R Studio was used to compile all possible parameter combinations for of both two (models 1-10) and three (models 11–20) parameter combinations. The top 10 models for both parameters combinations are shown in Figures S191 – S210. Where  $K_{ass} < 10$ , these data were excluded from this exhaustive parameter search as these values were defined to be beyond the limitations of our experimental  $^1\text{H}$  NMR titration methodology.

Table S46: Table of all the parameters used within this study. <sup>a</sup> SWF is determined by the area that is within  $1/8^{\text{th}}$  of the  $E_{\text{min}}$ , <sup>b</sup> SAF is determined by the area that is within  $1/8^{\text{th}}$  of the  $E_{\text{max}}$  at the electrophilic centre, <sup>c</sup> The positive surface area is the area within  $1/8^{\text{th}}$  of the  $E_{\text{max}}$  across the whole molecule.

| Parameter | Parameter description                                | Parameter definition                                                                |
|-----------|------------------------------------------------------|-------------------------------------------------------------------------------------|
| P0        | Association constant ( $\text{M}^{-1}$ )             | Association constant derived using a 1:1 binding isotherm.                          |
| P1        | $E_{\text{min}}$ (kJ/mol)                            | Electrostatic surface energy minimum                                                |
| P2        | $E_{\text{max}}$ (kJ/mol)                            | Electrostatic surface energy maximum                                                |
| P3        | Molecular Volume ( $\text{\AA}^3$ )                  | Total volume the molecule occupies                                                  |
| P4        | Molecular Area ( $\text{\AA}^2$ )                    | Total molecular area of the molecule.                                               |
| P5        | Solvent accessible area ( $\text{\AA}^2$ )           | Area accessible with a 1.4 $\text{\AA}$ radius probe.                               |
| P6        | Polar surface area ( $\text{\AA}^2$ )                | The area due to nitrogen and oxygen and any attached hydrogens.                     |
| P7        | % Polar surface area ( $\text{\AA}^2$ )              | The percentage polar surface area of the total surface area.                        |
| P8        | Polarizability                                       | How easily an electron cloud is distorted by an electric field                      |
| P9        | Steric weighting factor (SWF) ( $\text{\AA}^2$ )     | Area within $1/8^{\text{th}}$ of the $E_{\text{min}}$                               |
| P10       | Steric accessibility factor (SAF) ( $\text{\AA}^2$ ) | Area within $1/8^{\text{th}}$ of the $E_{\text{max}}$                               |
| P11       | HOMO (eV)                                            | Highest occupied molecular orbital                                                  |
| P12       | LUMO (eV)                                            | Lowest unoccupied molecular orbital                                                 |
| P13       | Energy (kJ)                                          | Total energy                                                                        |
| P14       | Electrostatic charge                                 | The electrostatic charge of the HBA oxygen atom of the simulant.                    |
| P15       | Additive N..O Bond length ( $\text{\AA}$ )           | The N..O bond lengths from both N atoms of the receptor added together.             |
| P16       | Log P                                                | Octanol water partition coefficient                                                 |
| P17       | Dipole moment (D)                                    | Separation of charge across the molecule.                                           |
| P18       | Additive NH..O bond length                           | Sum of both NH..O bond lengths between receptor and simulant.                       |
| P19       | Additive angle difference from $180^\circ$           | Sum of the N.H..O angles difference from $180^\circ$ between receptor and simulant. |



## Two Parameter Fits

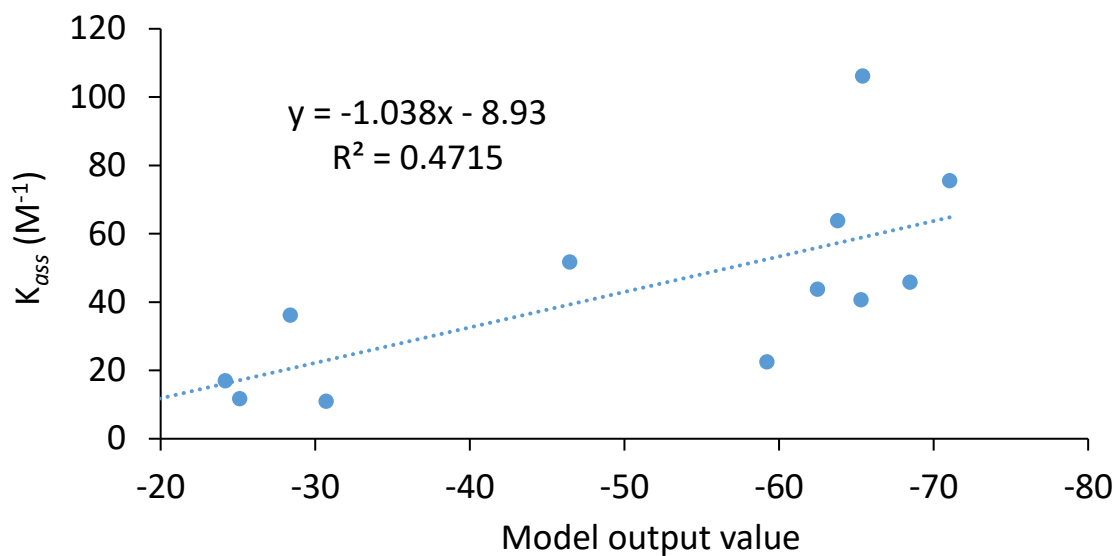

Figure S191: Model 1 vs  $K_{ass}$ . Model:  $P0 = P10 * P11$ . Linear trend line:  $R^2 = 0.4715$ , intercept = -8.9333 and slope = -1.0380.

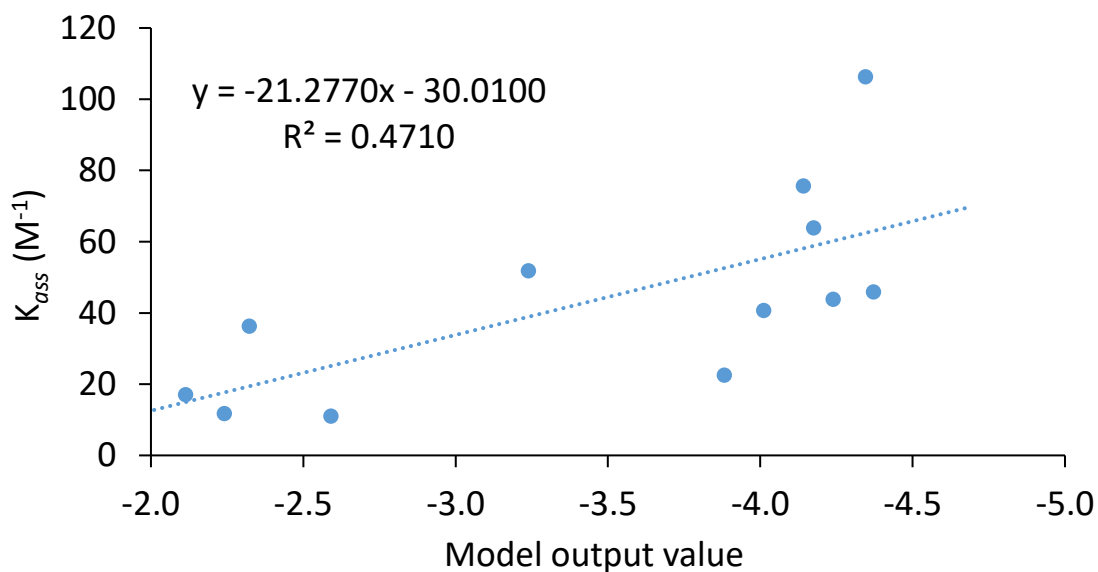

Figure S192: Model 2 vs  $K_{ass}$ . Model:  $P0 = P10 * P14$ . Linear trend line:  $R^2 = 0.4710$ , intercept = -30.0112 and slope = -21.2774.

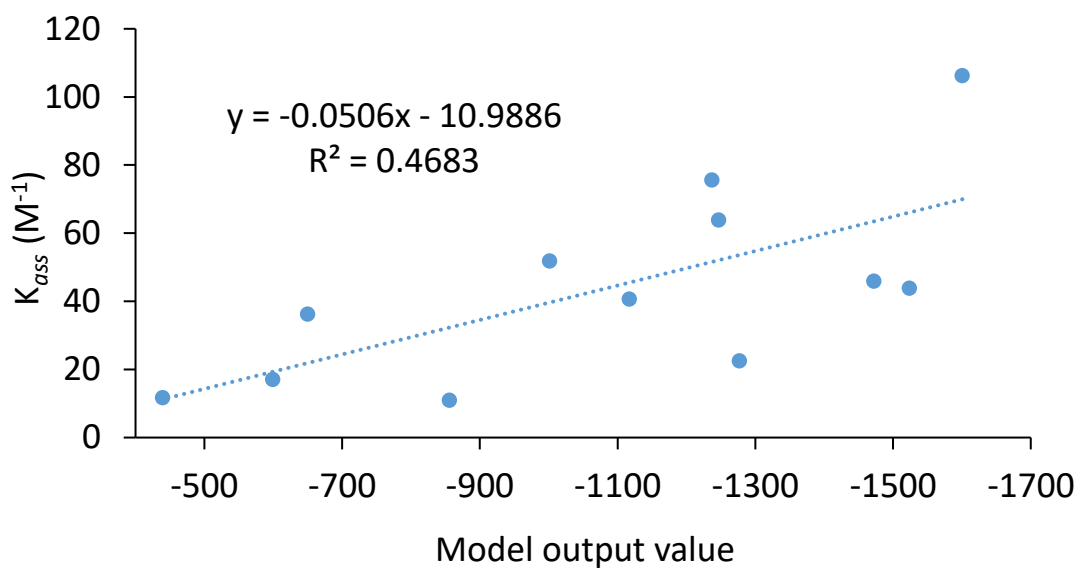

Figure S193: Model 3 vs  $K_{ass}$ . Model:  $P0 = P1 * P10$ . Linear trend line:  $R^2 = 0.4683$ , intercept = -10.9886 and slope = -0.0506.

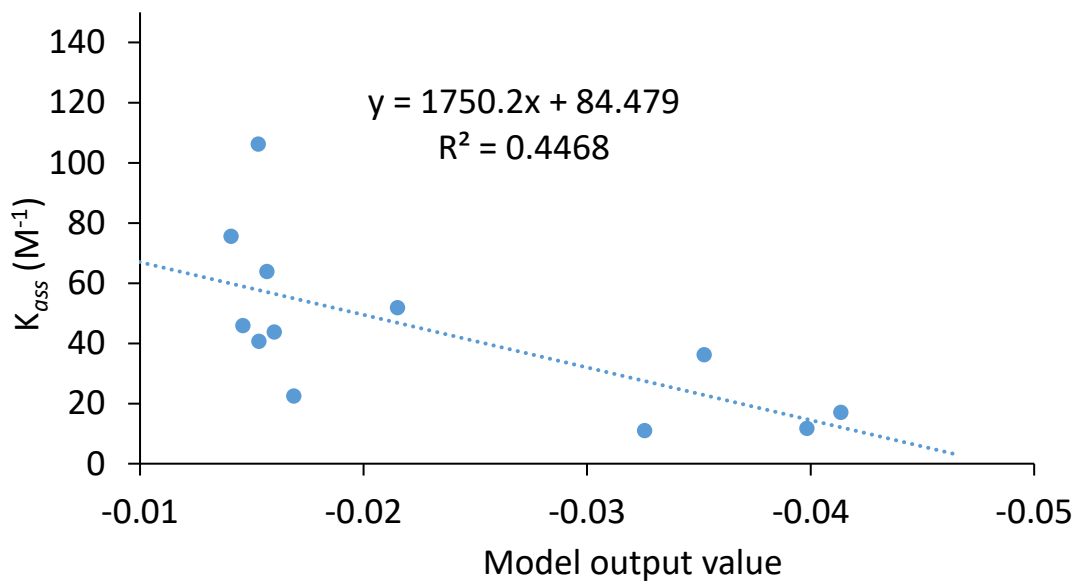

Figure S194: Model 4 vs  $K_{ass}$ . Model:  $P0 = (P11 * P10)^{-1}$ . Linear trend line:  $R^2 = 0.4468$ , intercept = 84.4793 and slope = 1750.1617

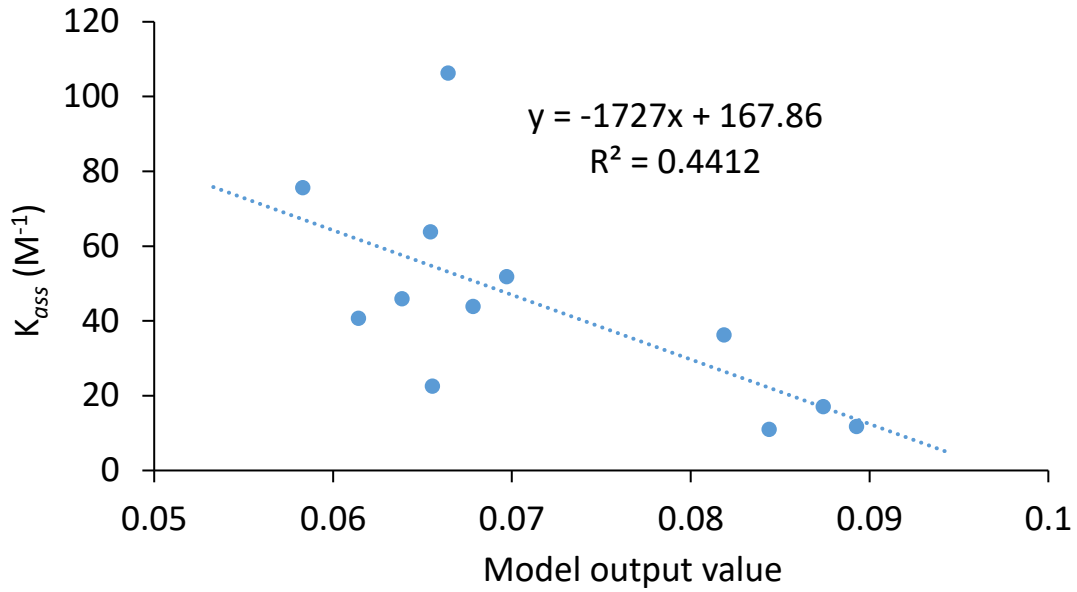

Figure S195: Model 5 vs  $K_{ass}$ . Model:  $P0 = P14 * (P11)^{-1}$ . Linear trend line:  $R^2 = 0.4412$ , intercept = 167.8598 and slope = -1726.9849.

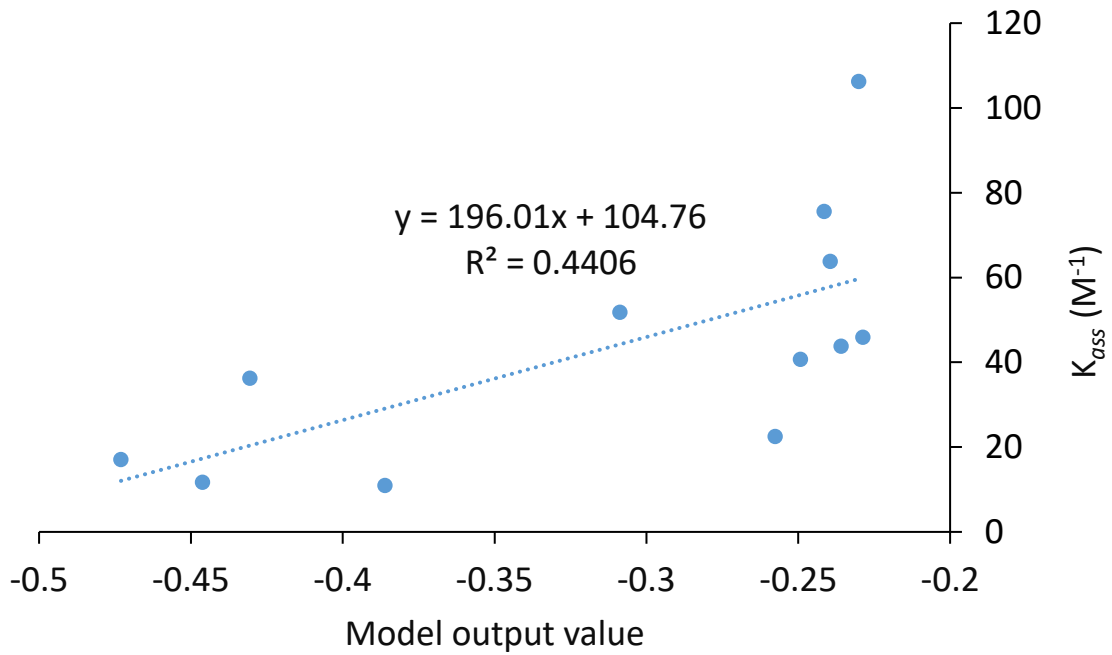

Figure S196: Model 6 vs  $K_{ass}$ . Model:  $P0 = (P14 * P10)^{-1}$ . Linear trend line:  $R^2 = 0.4406$ , intercept = 104.7600 and slope = 196.0087.

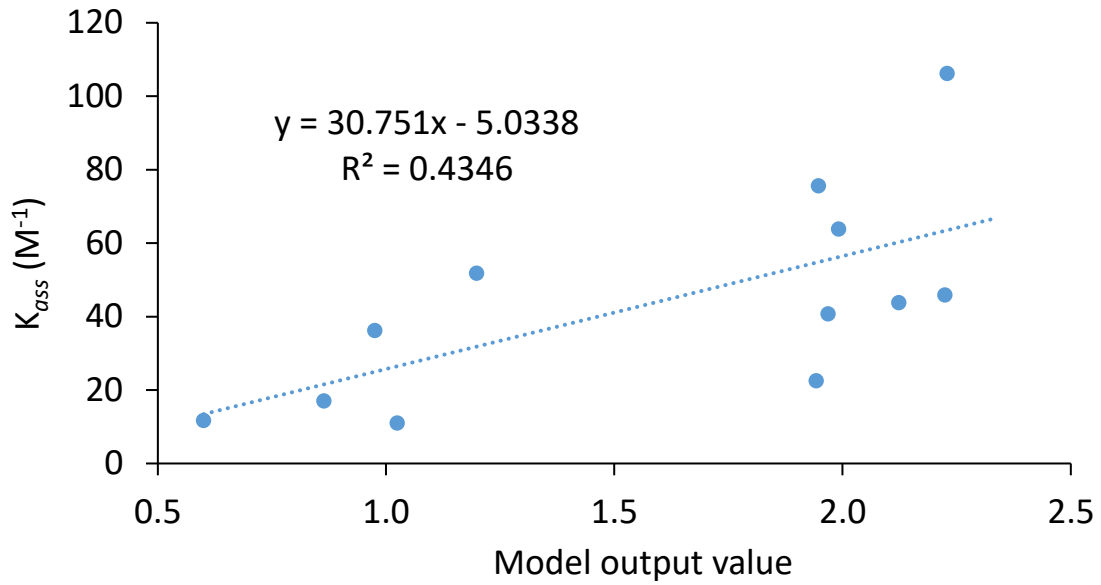

Figure S197: Model 7 vs  $K_{ass}$ . Model:  $P0 = P10 * (P18)^{-1}$ . Linear trend line:  $R^2 = 0.4346$ , intercept = -5.0338 and slope = 30.7510.

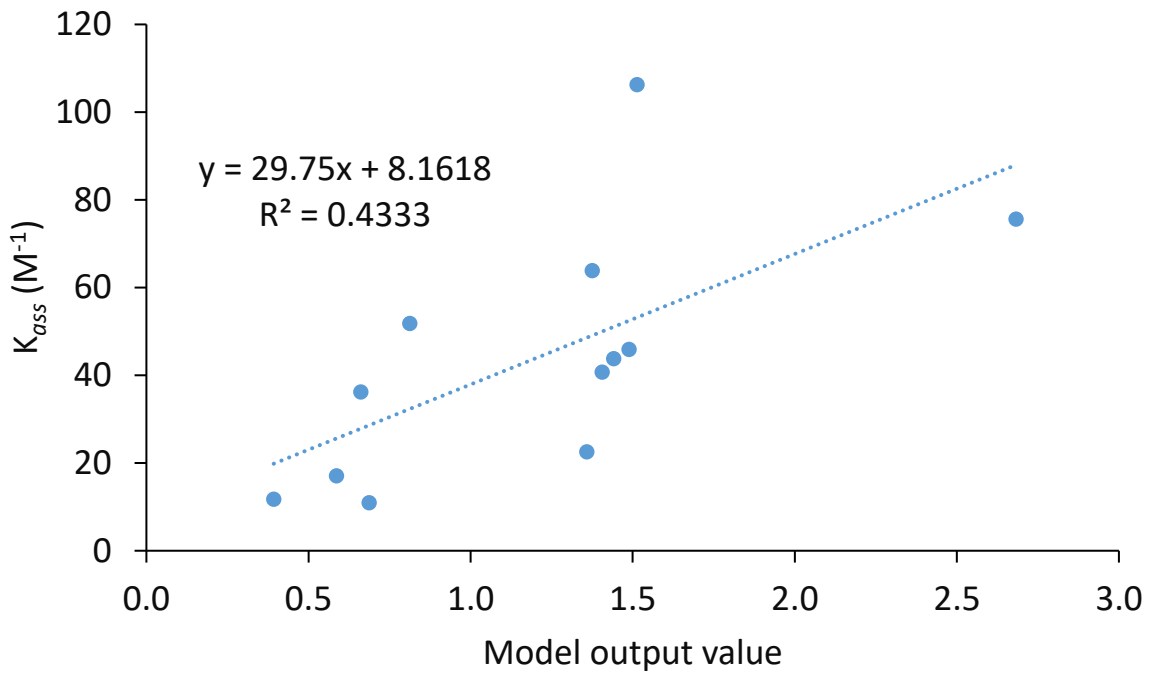

Figure S198: Model 8 vs  $K_{ass}$ . Model:  $P0 = P10 * (P15)^{-1}$ . Linear trend line:  $R^2 = 0.4333$ , intercept = 8.1618 and slope = 29.7500.

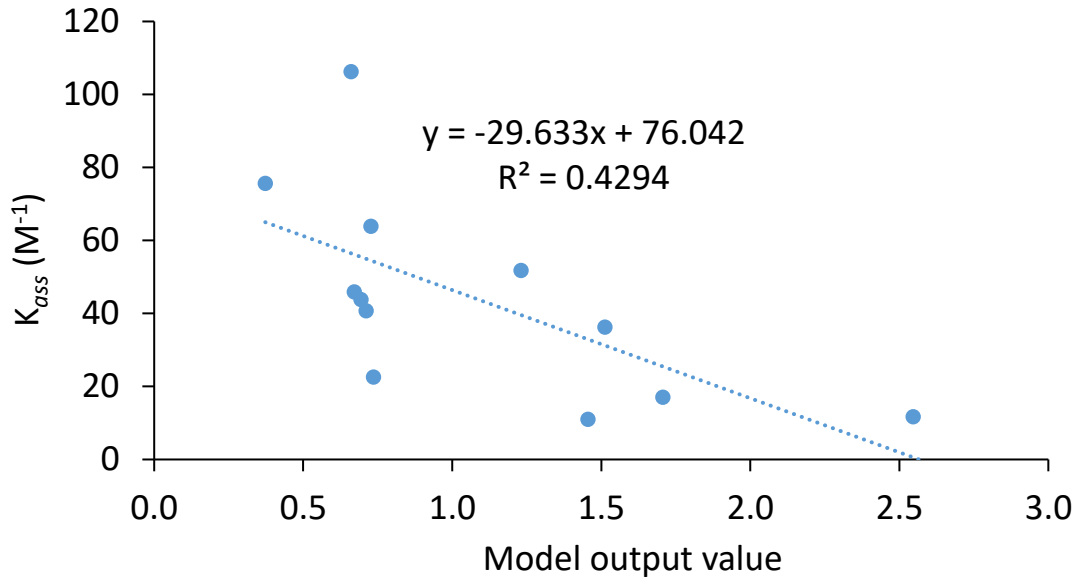

Figure S199: Model 9 vs  $K_{ass}$ . Model:  $P0 = P15 * (P10)^{-1}$ . Linear trend line:  $R^2 = 0.4294$ , intercept = 76.0419 and slope = -29.6332.

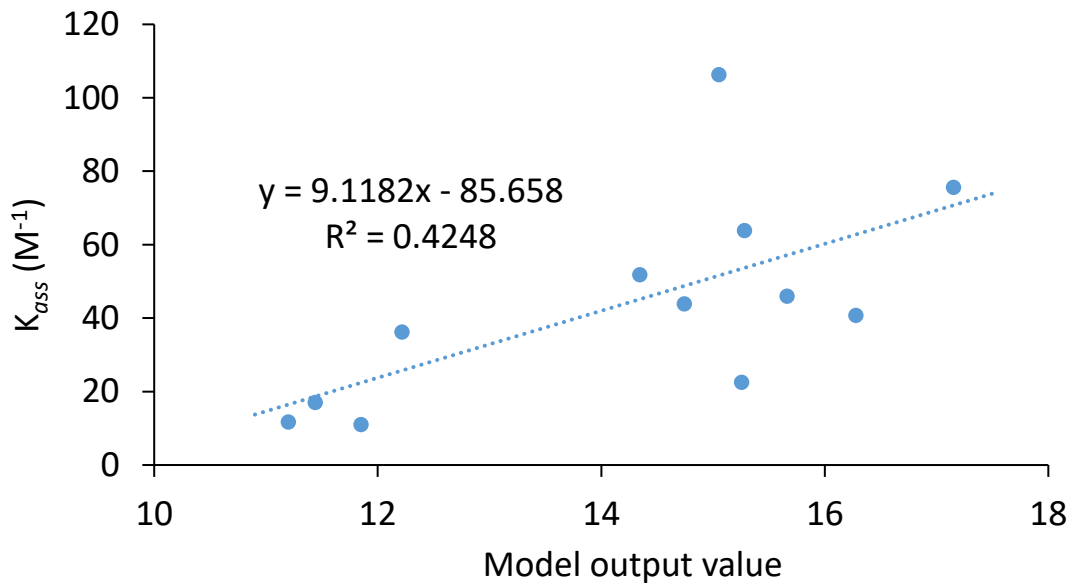

Figure S200: Model 10 vs  $K_{ass}$ . Model:  $P0 = P11 * (P14)^{-1}$ . Linear trend line:  $R^2 = 0.4248$ , intercept = -85.6579 and slope = 9.1182.

Table S47: Summary of the parameters and equations used within the top 10 models, identified through ranking of  $R^2$  values, for the two parameter fits.

| Parameter | Model Number           |                   |                   |                          |                          |                          |                          |                          |                          |                          | Total |
|-----------|------------------------|-------------------|-------------------|--------------------------|--------------------------|--------------------------|--------------------------|--------------------------|--------------------------|--------------------------|-------|
|           | 1                      | 2                 | 3                 | 4                        | 5                        | 6                        | 7                        | 8                        | 9                        | 10                       |       |
| $R^2$     | 0.4714                 | 0.4710            | 0.4683            | 0.4468                   | 0.4412                   | 0.4406                   | 0.4346                   | 0.4333                   | 0.4294                   | 0.4248                   |       |
| Equation  | $P_0 = P_x * P_y^{-1}$ | $P_0 = P_x * P_y$ | $P_0 = P_x * P_y$ | $P_0 = (P_x * P_y)^{-1}$ | $P_0 = P_x * (P_y)^{-1}$ | $P_0 = (P_x * P_y)^{-1}$ | $P_0 = P_x * (P_y)^{-1}$ |       |
| Slope     | -1.0380                | -21.2774          | -0.0506           | 1750.1617                | -1726.9849               | 196.0087                 | 30.7510                  | 29.7500                  | -29.6332                 | 9.1182                   |       |
| Intercept | -8.9333                | -30.0112          | -10.9886          | 84.4793                  | 167.8598                 | 104.7600                 | -5.0338                  | 8.1618                   | 76.04120                 | -85.6579                 |       |
| $P_1$     |                        |                   | x                 |                          |                          |                          |                          |                          |                          |                          | 1     |
| $P_2$     |                        |                   |                   |                          |                          |                          |                          |                          |                          |                          | 0     |
| $P_3$     |                        |                   |                   |                          |                          |                          |                          |                          |                          |                          | 0     |
| $P_4$     |                        |                   |                   |                          |                          |                          |                          |                          |                          |                          | 0     |
| $P_5$     |                        |                   |                   |                          |                          |                          |                          |                          |                          |                          | 0     |
| $P_6$     |                        |                   |                   |                          |                          |                          |                          |                          |                          |                          | 0     |
| $P_7$     |                        |                   |                   |                          |                          |                          |                          |                          |                          |                          | 0     |
| $P_8$     |                        |                   |                   |                          |                          |                          |                          |                          |                          |                          | 0     |
| $P_9$     |                        |                   |                   |                          |                          |                          |                          |                          |                          |                          | 0     |
| $P_{10}$  | x                      | x                 | x                 | x                        |                          | x                        | x                        | x                        | x                        |                          | 8     |
| $P_{11}$  | x                      |                   |                   | x                        | x                        |                          |                          |                          |                          | x                        | 4     |
| $P_{12}$  |                        |                   |                   |                          |                          |                          |                          |                          |                          |                          | 0     |
| $P_{13}$  |                        |                   |                   |                          |                          |                          |                          |                          |                          |                          | 0     |
| $P_{14}$  |                        | x                 |                   |                          | x                        | x                        |                          |                          |                          | x                        | 4     |
| $P_{15}$  |                        |                   |                   |                          |                          |                          |                          | x                        | x                        |                          | 2     |
| $P_{16}$  |                        |                   |                   |                          |                          |                          |                          |                          |                          |                          | 0     |
| $P_{17}$  |                        |                   |                   |                          |                          |                          |                          |                          |                          |                          | 0     |
| $P_{18}$  |                        |                   |                   |                          |                          |                          | x                        |                          |                          |                          | 1     |
| $P_{19}$  |                        |                   |                   |                          |                          |                          |                          |                          |                          |                          | 0     |

It can be seen that several fits are reciprocal e.g. Model 8 is  $1/(\text{Model } 9)$ ; the gradients change sign as a result. This is understandable as, when fitting to a simplistic linear model, both linear and inverse fits will be found.

Three Parameter Fits

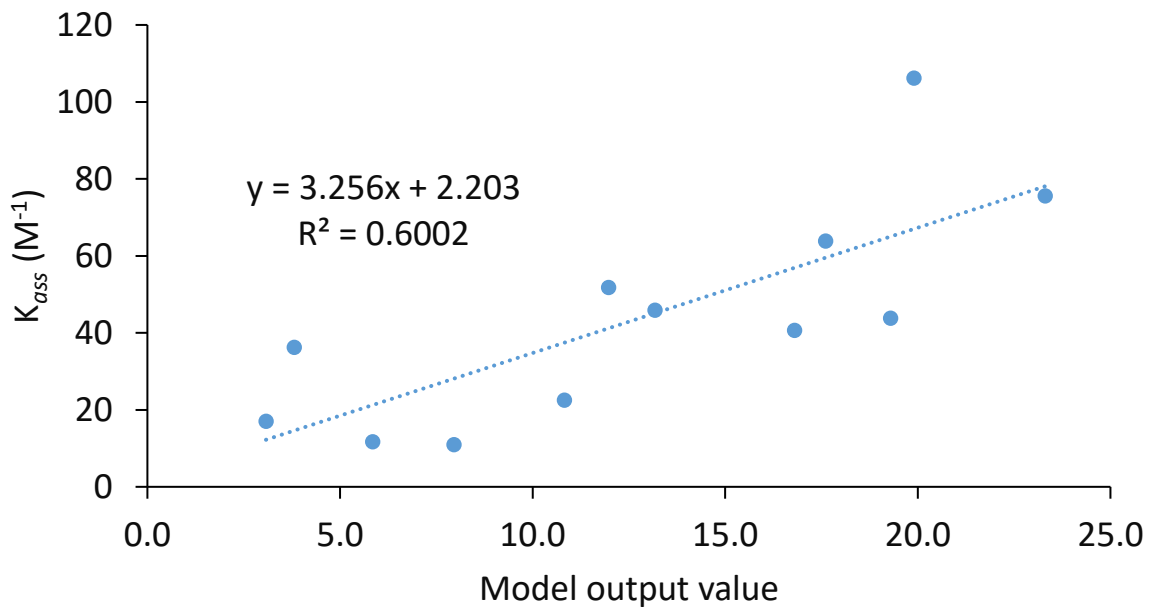

Figure S201: Model 11 vs  $K_{ass}$ . Model:  $P0 = P10 * P10 * (P17)^{-1}$ . Linear trend line:  $R^2 = 0.6002$ , intercept = 2.2030 and slope = 3.2560.

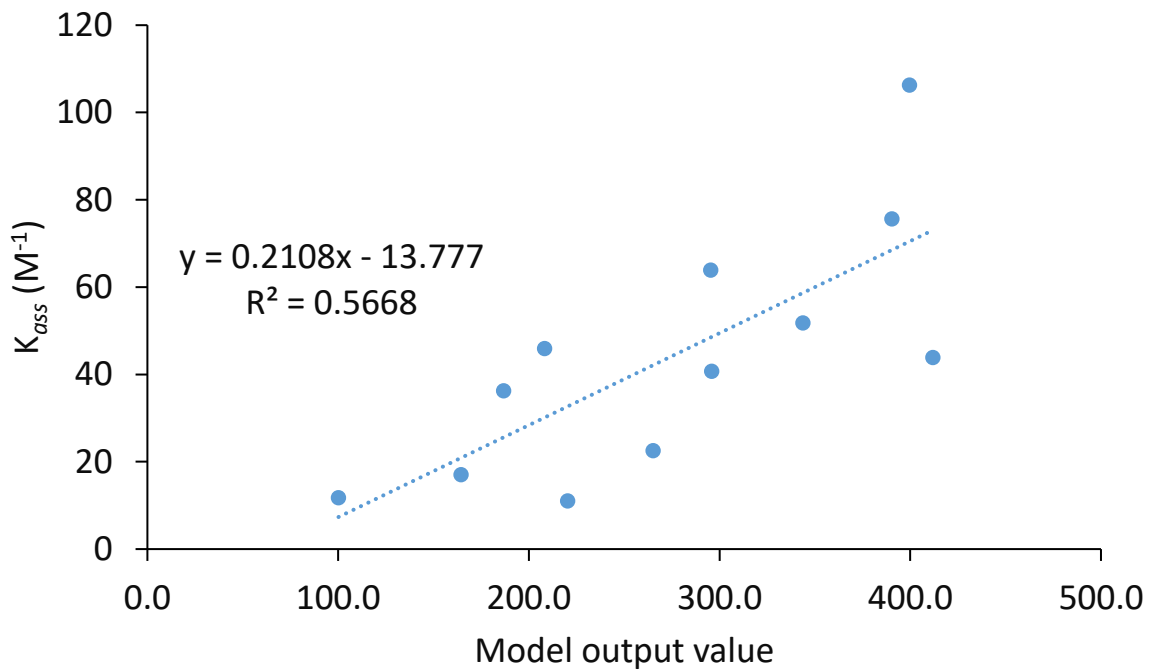

Figure S202: Model 12 vs  $K_{ass}$ . Model:  $P0 = P6 * P10 * (P17)^{-1}$ . Linear trend line:  $R^2 = 0.5668$ , intercept = -13.7771 and slope = 0.2108.

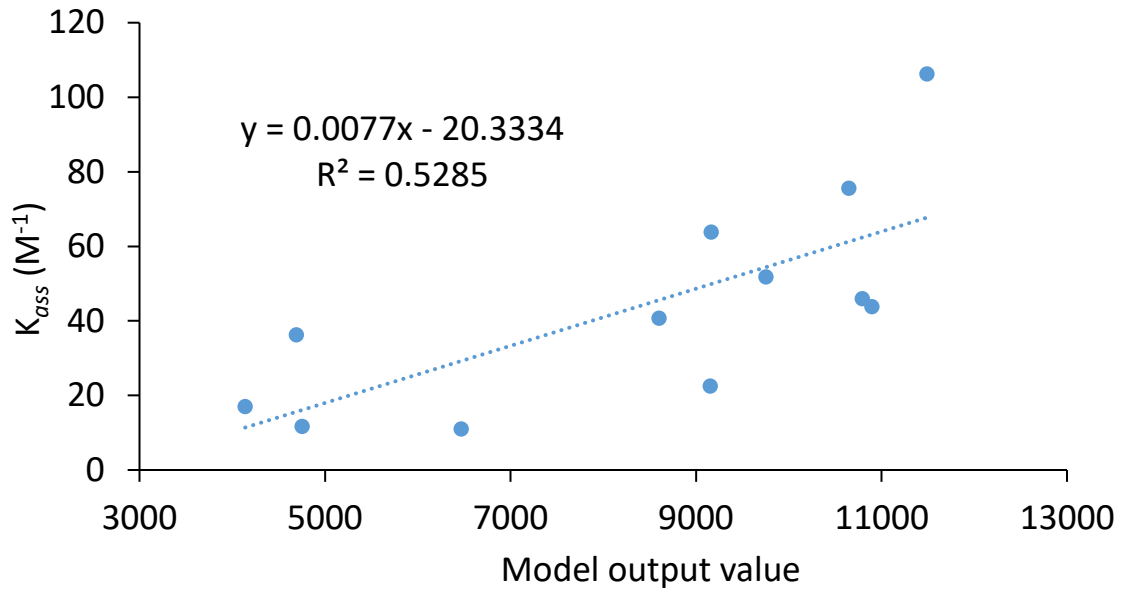

Figure S203: Model 13 vs  $K_{ass}$ . Model:  $P_0 = P_1 * P_{10} * P_{11}$ . Linear trend line:  $R^2 = 0.5285$ , intercept = -20.3334 and slope = 0.0077.

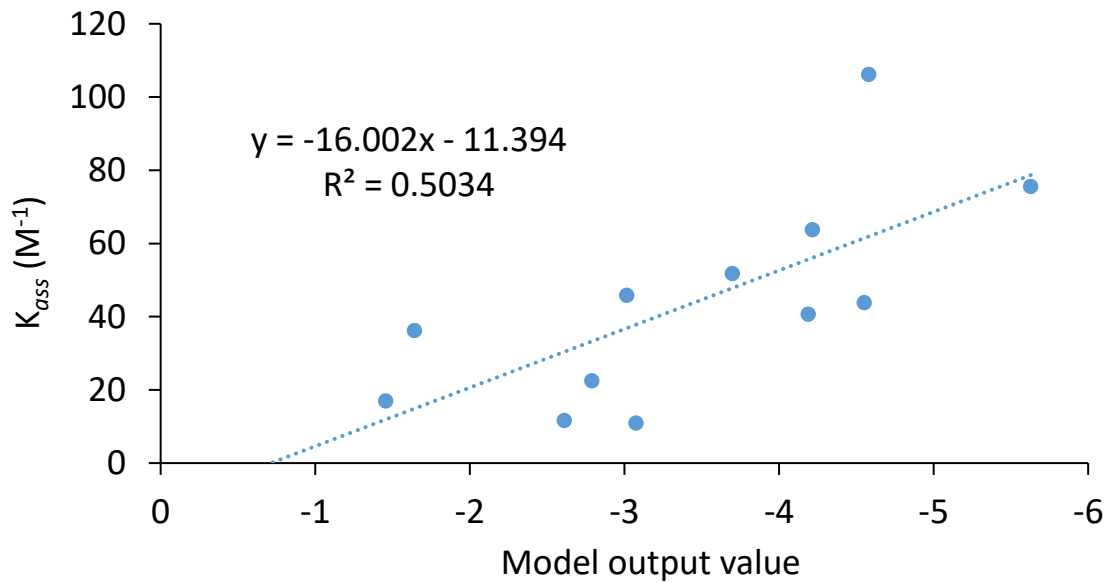

Figure S204: Model 14 vs  $K_{ass}$ . Model:  $P_0 = P_{10} * (P_{14} * P_{17})^{-1}$ . Linear trend line:  $R^2 = 0.5034$ , intercept = -11.3939 and slope = -16.0023.



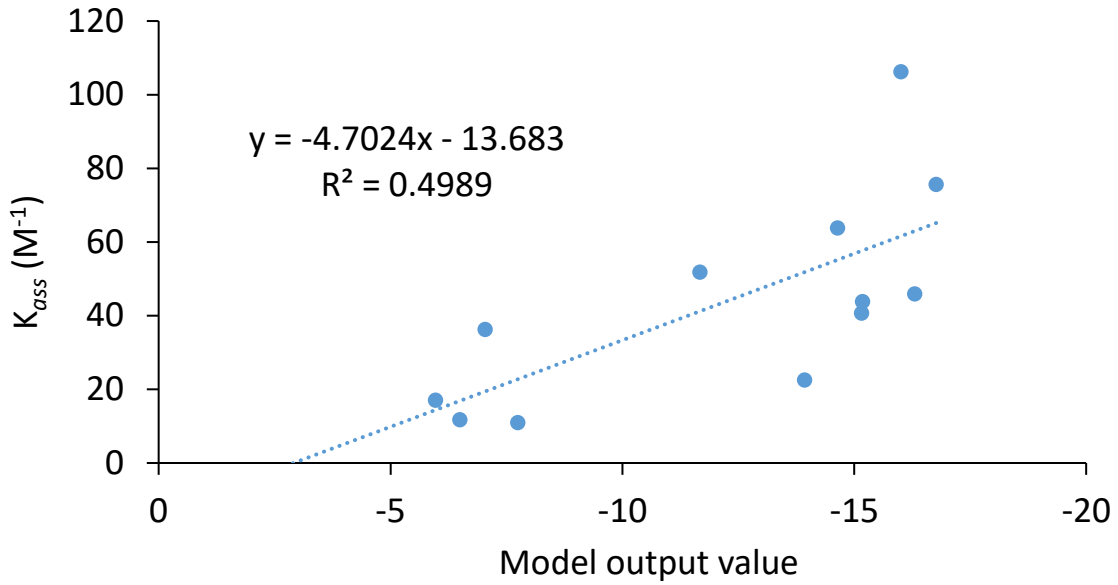

Figure S205: Model 15 vs  $K_{ass}$ . Model:  $P0 = P10 * P11 * (P18)^{-1}$ . Linear trend line:  $R^2 = 0.4989$ , intercept = -13.6827 and slope = -4.7024.

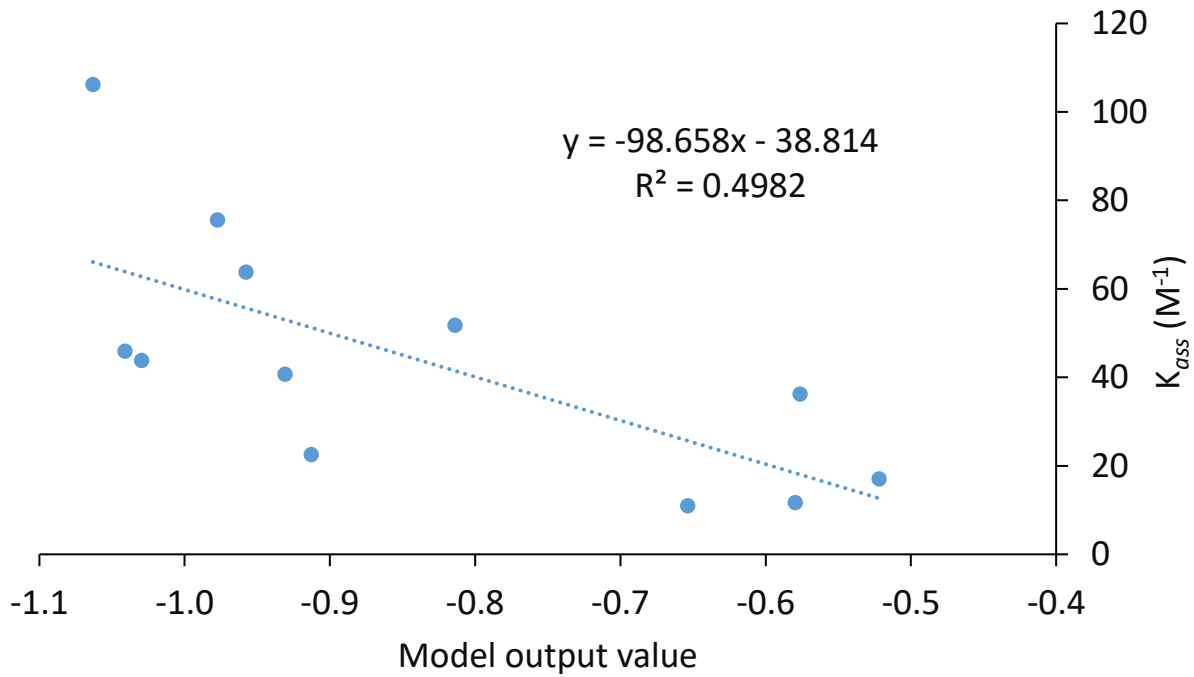

Figure S206: Model 16 vs  $K_{ass}$ . Model:  $P0 = P10 * P14 * (P18)^{-1}$ . Linear trend line:  $R^2 = 0.4982$ , intercept = -38.8140 and slope = -98.6581.

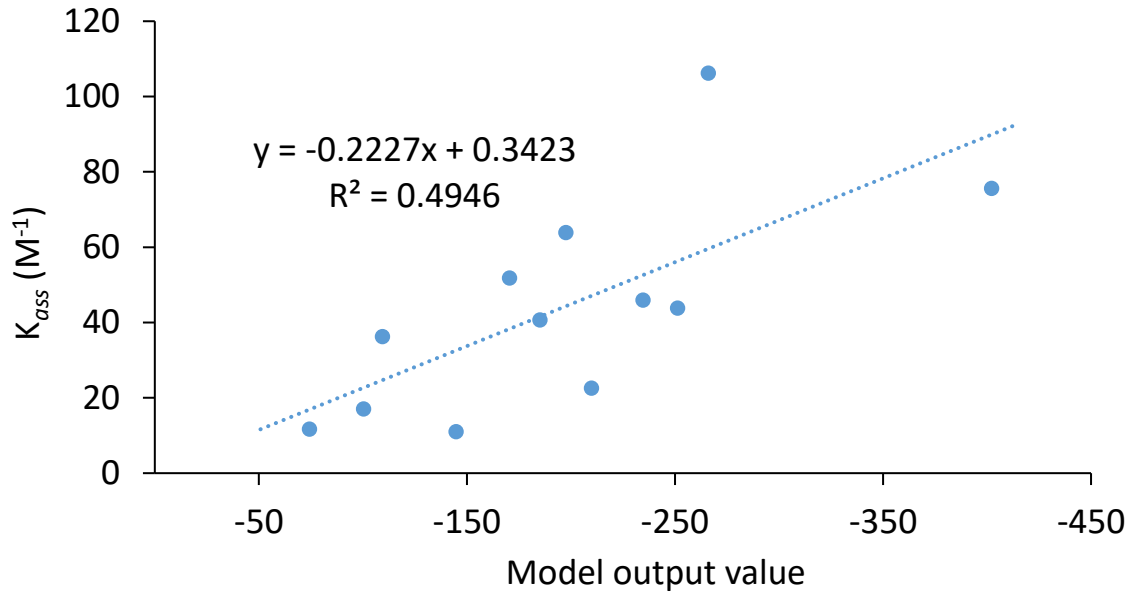

Figure S207: Model 17 vs  $K_{ass}$ . Model:  $P_0 = P_1 * P_{10} * (P_{15})^{-1}$ . Linear trend line:  $R^2 = 0.4946$ , intercept = 0.3424 and slope = -0.2227.

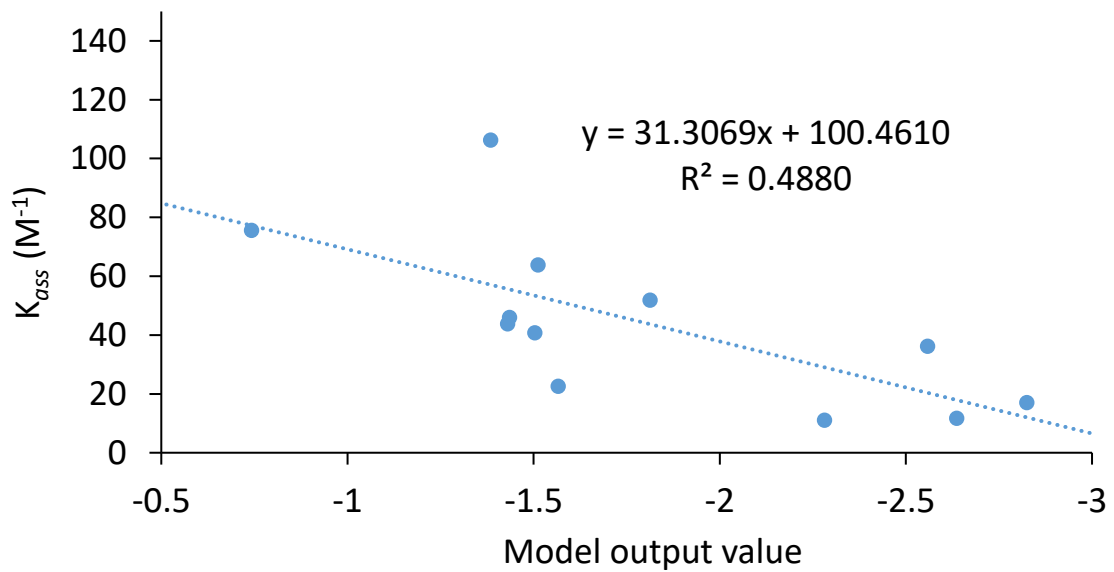

Figure S208: Model 18 vs  $K_{ass}$ . Model:  $P_0 = P_{15} * (P_{14} * P_{10})^{-1}$ . Linear trend line:  $R^2 = 0.4880$ , intercept = 100.4610 and slope = 31.3069.

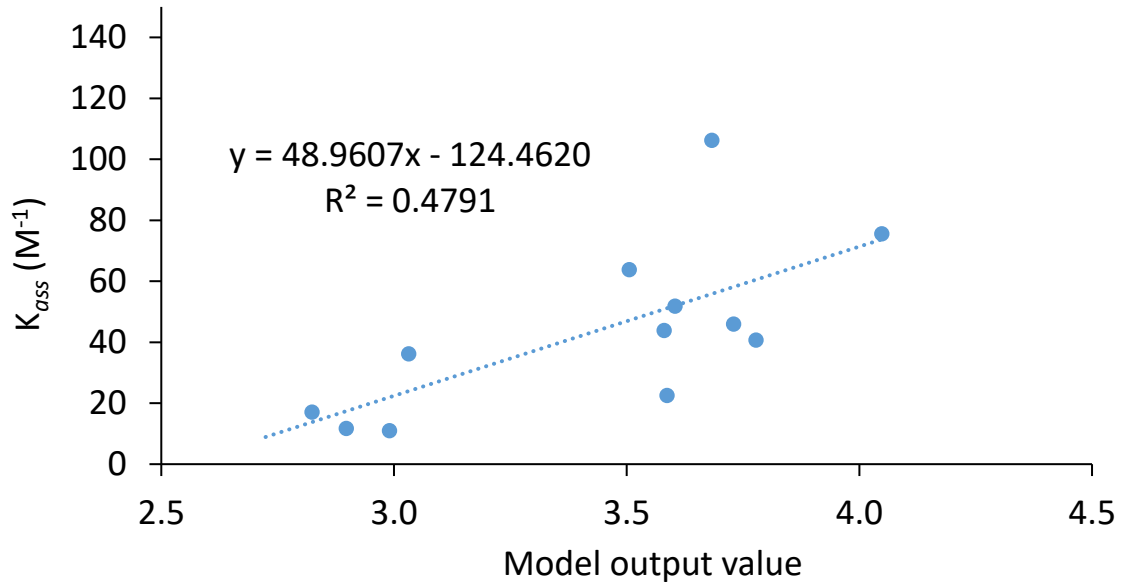

Figure S209: Model 19 vs  $K_{ass}$ . Model:  $P_0 = P_{11} * (P_{14} * P_{18})^{-1}$ . Linear trend line:  $R^2 = 0.4791$ , intercept = -124.4620 and slope = 48.9607.

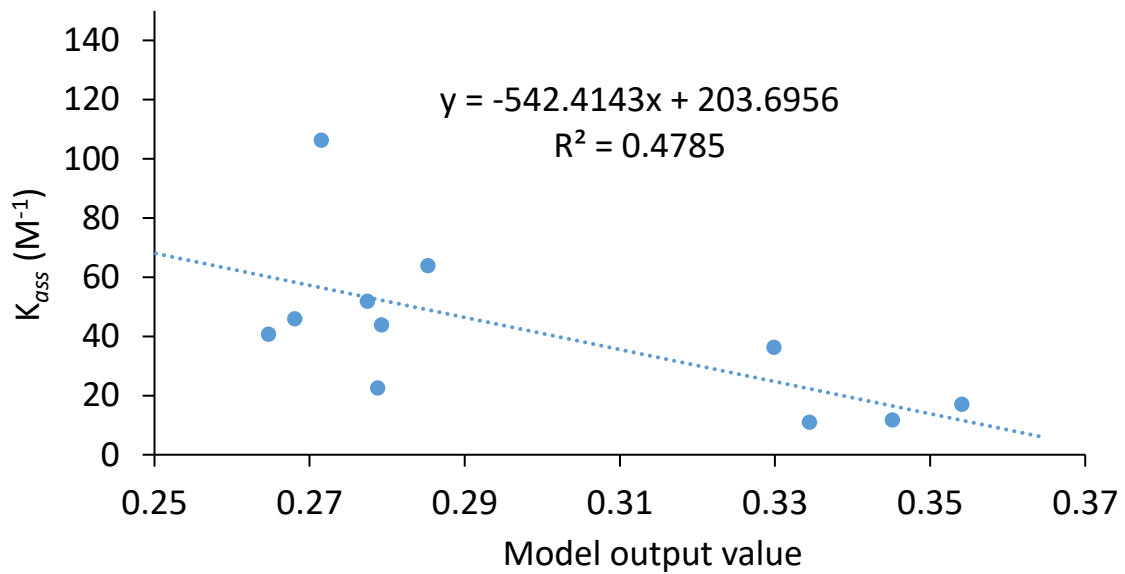

Figure S210: Model 20 vs  $K_{ass}$ . Model:  $P_0 = P_{18} * P_{14} * (P_{11})^{-1}$ . Linear trend line:  $R^2 = 0.4785$ , intercept = 203.6956 and slope = -542.4144.

Table S48: Summary of the parameters and equations used within the top 10 models, identified through ranking of  $R^2$  values, for the three parameter fits.

| Parameter | Model Number                   |                                |                         |                                |                                |                                |                                |                                |                                |                                | Total                          |
|-----------|--------------------------------|--------------------------------|-------------------------|--------------------------------|--------------------------------|--------------------------------|--------------------------------|--------------------------------|--------------------------------|--------------------------------|--------------------------------|
|           | 11                             | 12                             | 13                      | 14                             | 15                             | 16                             | 17                             | 18                             | 19                             | 20                             |                                |
| $R^2$     | 0.6002                         | 0.5667                         | 0.5286                  | 0.5034                         | 0.4989                         | 0.4982                         | 0.4946                         | 0.4880                         | 0.4790                         | 0.4785                         |                                |
| Equation  | $P_0 = P_x * P_x * (P_y)^{-1}$ | $P_0 = P_x * P_y * (P_z)^{-1}$ | $P_0 = P_x * P_y * P_z$ | $P_0 = P_x * (P_y * P_z)^{-1}$ | $P_0 = P_x * P_y * (P_z)^{-1}$ | $P_0 = P_x * P_y * (P_z)^{-1}$ | $P_0 = P_x * P_y * (P_z)^{-1}$ | $P_0 = P_x * (P_y * P_z)^{-1}$ | $P_0 = P_x * (P_y * P_z)^{-1}$ | $P_0 = P_x * (P_y * P_z)^{-1}$ | $P_0 = P_x * P_y * (P_z)^{-1}$ |
| Slope     | 3.2560                         | 0.2108                         | -20.3334                | -16.0023                       | -4.7024                        | -98.6581                       | -0.2227                        | 31.3069                        | 48.9607                        | -542.4140                      |                                |
| Intercept | 2.2030                         | -13.7771                       | 0.0077                  | -11.3939                       | -13.6827                       | -38.8140                       | 0.3424                         | 100.4610                       | -124.4620                      | 203.6956                       |                                |
| $P_1$     |                                |                                | x                       |                                |                                |                                | x                              |                                |                                |                                | 2                              |
| $P_2$     |                                |                                |                         |                                |                                |                                |                                |                                |                                |                                | 0                              |
| $P_3$     |                                |                                |                         |                                |                                |                                |                                |                                |                                |                                | 0                              |
| $P_4$     |                                |                                |                         |                                |                                |                                |                                |                                |                                |                                | 0                              |
| $P_5$     |                                |                                |                         |                                |                                |                                |                                |                                |                                |                                | 0                              |
| $P_6$     |                                | x                              |                         |                                |                                |                                |                                |                                |                                |                                | 1                              |
| $P_7$     |                                |                                |                         |                                |                                |                                |                                |                                |                                |                                | 0                              |
| $P_8$     |                                |                                |                         |                                |                                |                                |                                |                                |                                |                                | 0                              |
| $P_9$     |                                |                                |                         |                                |                                |                                |                                |                                |                                |                                | 0                              |
| $P_{10}$  | xx                             | x                              | x                       | x                              | x                              | x                              | x                              | x                              |                                |                                | 9                              |
| $P_{11}$  |                                |                                | x                       |                                | x                              |                                |                                |                                | x                              | x                              | 4                              |
| $P_{12}$  |                                |                                |                         |                                |                                |                                |                                |                                |                                |                                | 0                              |
| $P_{13}$  |                                |                                |                         |                                |                                |                                |                                |                                |                                |                                | 0                              |
| $P_{14}$  |                                |                                |                         | x                              |                                | x                              |                                | x                              | x                              | x                              | 5                              |
| $P_{15}$  |                                |                                |                         |                                |                                |                                | x                              | x                              |                                |                                | 2                              |
| $P_{16}$  |                                |                                |                         |                                |                                |                                |                                |                                |                                |                                | 0                              |
| $P_{17}$  | x                              | x                              |                         | x                              |                                |                                |                                |                                |                                |                                | 3                              |
| $P_{18}$  |                                |                                |                         |                                | x                              | x                              |                                |                                | x                              | x                              | 4                              |
| $P_{19}$  |                                |                                |                         |                                |                                |                                |                                |                                |                                |                                | 0                              |

### Free energy contributions and Parametric fitting

The well-known relationship between free energy and equilibrium constant is given by:

$$\Delta G = -RT \ln K$$

As a result of this, additive contributions to free energy will have a multiplicative contribution to equilibrium constant. Thus for any given contribution to  $K$ , such that:

$$\text{Equation 1: } K_{ass} = P_x^a \times P_y^b$$

$$|a| + |b| = 2$$

$$\text{Equation 2: } K_{ass} = P_x^a \times P_y^b \times P_z^c$$

$$|a| + |b| + |c| = 3$$

It can be seen that:

$$\begin{aligned} \Delta G &= -RT \ln K \\ &= -RT \ln P_x - RT \ln P_y - RT \ln P_z \end{aligned}$$

Crucially, the same is true for any constants of proportionality required to relate a given parameter to the energetic contribution (*e.g.* charge and energy linked *via* Coulomb's law) as these give rise to constant contributions to energy and so do not affect the gradient of the correlation.

## References

1. P. Job, *Anal. Chim. Appl.*, 1928, **9**, 113–203.
2. N. Busschaert, I. L. Kirby, S. Young, S. J. Coles, P. N. Horton, M. E. Light and P. A. Gale, *Angew. Chemie - Int. Ed.*, 2012, **51**, 4426–4430.
3. C. M. Chau, T. J. Chuan and K. M. Liu, *RSC Adv.*, 2014, **4**, 1276–1282.
4. S. M. S. Chauhan, B. Garg and T. Bisht, *Molecules*, 2007, **12**, 2458–2466.
5. Y. F. Chen, C. L. Kao, W. K. Lee, P. C. Huang, C. Y. Hsu and C. H. Kuei, *J. Chinese Chem. Soc.*, 2016, **63**, 751–757.
6. D. S. Panmand, A. D. Tiwari, S. S. Panda, J. C. M. Monbaliu, L. K. Beagle, A. M. Asiri, C. V. Stevens, P. J. Steel, C. D. Hall and A. R. Katritzky, *Tetrahedron Lett.*, 2014, **55**, 5898–5901.
7. H. Huang and J. Y. Kang, *Org. Lett.*, 2018, **20**, 4938–4941.
8. S. Feng, J. Li and J. Wei, *New J. Chem.*, 2017, **41**, 4743–4746.
9. D. V. Schoonover and H. W. Gibson, *Tetrahedron Lett.*, 2017, **58**, 242–244.
10. J. W. W. Chang, E. Y. Chia, C. L. L. Chai and J. Seayad, *Org. Biomol. Chem.*, 2012, **10**, 2289–2299.
11. T. Noji, H. Fujiwara, K. Okano and H. Tokuyama, *Org. Lett.*, 2013, **15**, 1946–1949.
12. N. Ortega, A. Feher-Voelger, M. Brovetto, J. I. Padrón, V. S. Martín and T. Martín, *Adv. Synth. Catal.*, 2011, **353**, 963–972.
13. J. Wang, Y. Zhao, W. Zhao, P. Wang and J. Li, *J. Carbohydr. Chem.*, 2017, **35**, 445–454.
14. C. A. Hunter, *Angew. Chem. Int. Ed.*, 2004, **43**, 5310–5324.
15. J. J. P. Stewart, *J Mol Model*, 2007, **13**, 1173–1213.
16. Y. Zhao and D. G. Truhlar, *Theor. Chem. Acc.*, 2008, **120**, 215–241.
17. A. D. McLean and G. S. Chandler, *J. Chem. Phys.*, 1980, **72**, 5639–5648.
18. M. J. Frisch, G. W. Trucks, H. B. Schlegel, G. E. Scuseria, M. A. Robb, J. R. Cheeseman, G. Scalmani, V. Barone, G. A. Petersson, H. Nakatsuji, X. Li, M. Caricato, A. V. Marenich, J. Bloino, B. G. Janesko, R. Gomperts, B. Mennucci, H. P. Hratchian, J. V. Ortiz, A. F. Izmaylov, J. L. Sonnenberg, Williams, F. Ding, F. Lipparini, F. Egidi, J. Goings, B. Peng, A. Petrone, T. Henderson, D. Ranasinghe, V. G. Zakrzewski, J. Gao, N. Rega, G. Zheng, W. Liang, M. Hada, M. Ehara, K. Toyota, R. Fukuda, J. Hasegawa, M. Ishida, T. Nakajima, Y. Honda, O. Kitao, H. Nakai, T. Vreven, K. Throssell, J. A. Montgomery Jr., J. E. Peralta, F. Ogliaro, M. J. Bearpark, J. J. Heyd, E. N. Brothers, K. N. Kudin, V. N. Staroverov, T. A. Keith, R. Kobayashi, J. Normand, K. Raghavachari, A. P. Rendell, J. C. Burant, S. S. Iyengar, J. Tomasi, M. Cossi, J. M. Millam, M. Klene, C. Adamo, R. Cammi, J. W. Ochterski, R. L. Martin, K. Morokuma, O. Farkas, J. B. Foresman and D. J. Fox, Gaussian 16; Revision A.03; Gaussian Inc.; Wallingford CT; 2016.
19. M. Walker, A. J. A. Harvey, A. Sen and C. E. H. Dessent, *J. Phys. Chem. A*, 2013, **117**, 12590–12600.
